# Supplementary material for: Inequalities in caries among pre-school Italian children with different background
Source: Research Square preprint supplement (doi:10.21203/rs.3.rs-1117983/v2), 2022-01-28
Supplement: Supplementary file 1 [file 30749ae141ff26860180a6df.xlsx]

## Sheet: raw european 
id	sex	areas	Immigrants	households	breastfeeding	pacifiernight	Fatheroccprofile	motheroccprofile	smokinghabits	cariogenicdiet	brushingteeth	lowedulevelfatather	lowedulevelmother	nkids	enamel	precavitated	cavitated	teethpresent	filled	bleeding	cariestotal	fatherocc2	motherocc2	fathered	mothered	parentsed	cariesEx
1	1	2	0	2	4	1	2	1	1	1	1	2	2	1	0	1	0	20	0	0	1	2	1	2	2	4	1
2	1	3	0	1	0	0	2	1	0	0	2	2	2	1	0	0	0	20	0	0	0	2	1	2	2	4	0
3	1	3	0	1	0	0	2	1	0	0	2	2	2	1	0	0	0	20	0	0	0	2	1	2	2	4	0
4	1	2	0	2	4	1	2	1	1	1	1	2	2	1	0	1	0	20	0	0	1	2	1	2	2	4	1
5	1	3	0	1	0	0	2	1	0	0	2	2	2	1	0	0	0	20	0	0	0	2	1	2	2	4	0
6	1	3	0	1	0	0	2	1	0	0	2	2	2	1	0	0	0	20	0	0	0	2	1	2	2	4	0
7	1	3	0	1	0	0	2	1	0	0	2	2	2	1	0	0	0	20	0	0	0	2	1	2	2	4	0
8	1	3	0	1	0	0	2	1	0	0	2	2	2	1	0	0	0	20	0	0	0	2	1	2	2	4	0
9	0	1	0	1	4	1	2	1	1	1	1	2	2	1	0	1	0	20	0	0	1	2	1	2	2	4	1
10	1	3	0	1	0	0	2	1	0	0	2	2	2	1	0	0	0	20	0	0	0	2	1	2	2	4	0
11	1	3	0	1	0	0	2	1	0	0	2	2	2	1	0	0	0	20	0	0	0	2	1	2	2	4	0
12	1	3	0	1	0	0	2	2	0	0	2	2	1	1	0	0	0	20	0	0	0	2	2	2	1	3	0
13	1	3	0	1	0	0	2	1	0	0	2	2	2	1	0	0	0	20	0	0	0	2	1	2	2	4	0
14	1	3	0	1	0	0	2	1	0	0	2	2	2	1	0	0	0	20	0	0	0	2	1	2	2	4	0
15	1	3	0	1	0	0	2	1	0	0	2	2	2	1	0	0	0	20	0	0	0	2	1	2	2	4	0
16	1	3	0	1	0	0	2	2	0	0	2	2	2	1	0	0	0	20	0	0	0	2	2	2	2	4	0
17	1	3	0	1	0	0	2	1	0	0	2	2	2	1	0	0	0	20	0	0	0	2	1	2	2	4	0
18	1	3	0	1	0	0	2	1	0	0	2	2	2	1	0	0	0	20	0	0	0	2	1	2	2	4	0
19	1	3	0	1	0	0	2	1	0	0	2	2	2	1	0	0	0	20	0	0	0	2	1	2	2	4	0
20	0	2	0	1	4	1	2	1	1	1	2	2	2	1	0	1	0	20	0	0	1	2	1	2	2	4	1
21	1	3	0	1	0	0	2	1	0	0	2	2	2	1	0	0	0	20	0	0	0	2	1	2	2	4	0
22	0	2	0	2	4	0	2	1	1	1	2	2	2	1	0	1	0	20	0	0	1	2	1	2	2	4	1
23	1	3	0	1	0	0	2	1	0	0	2	2	2	1	0	0	0	20	0	0	0	2	1	2	2	4	0
24	0	2	0	2	4	1	2	1	1	1	2	2	2	1	0	1	0	20	0	0	1	2	1	2	2	4	1
25	0	2	0	2	4	1	2	1	1	1	2	2	2	1	0	1	0	20	0	0	1	2	1	2	2	4	1
26	1	2	0	2	4	1	2	1	1	1	1	2	2	1	0	1	0	20	0	0	1	2	1	2	2	4	1
27	0	2	0	3	1	1	3	1	1	1	1	3	2	1	0	0	1	20	0	1	1	3	1	3	2	5	1
28	1	1	0	3	0	0	3	2	0	0	2	2	2	1	0	0	0	20	0	1	0	3	2	2	2	4	0
29	1	3	0	4	0	0	3	3	0	0	2	3	3	1	0	0	0	20	0	1	0	3	3	3	3	6	0
30	0	1	0	2	0	0	2	2	0	1	2	3	3	1	1	0	0	20	0	1	1	2	2	3	3	6	1
31	0	4	0	2	3	1		1	1	1	1	3	3	1	0	0	1	20	0	1	1		1	3	3	6	1
32	0	2	0	3	3	1	3	3	1	1	2	3	3	1	1	0	0	20	0	1	1	3	3	3	3	6	1
33	1	3	0	2	3	0	1	1	0	0	2	1	1	1	0	0	0	20	0	1	0	1	1	1	1	2	0
34	1	2	0	4	0	0	3	3	0	0	2	3	3	1	0	0	0	20	0	1	0	3	3	3	3	6	0
35	0	2	0	3	1	1	3	3	0	1	2	2	2	1	0	0	0	20	0	1	0	3	3	2	2	4	0
36	0	4	0	1	3	0		2	0	1	2	3	3	1	0	0	1	20	0	1	1		2	3	3	6	1
37	1	3	0	2	2	0		2	1	1	2	3	3	1	0	0	1	20	0	1	1		2	3	3	6	1
38	0	4	0	2	0	1		1	1	1	1	3	3	1	0	0	1	20	0	1	1		1	3	3	6	1
39	1	2	0	3	2	0	3	2	0	0	2	2	2	1	0	0	0	20	0	1	0	3	2	2	2	4	0
40	1	2	0	3	3	0	3	2	0	0	2	3	3	1	0	0	0	20	0	1	0	3	2	3	3	6	0
41	0	1	0	3	3	0	3	3	1	0	2	3	3	1	1	0	0	20	0	1	1	3	3	3	3	6	1
42	0	5	0	1	3	1	2	1	0	1	1	2	2	1	0	0	1	20	0	1	1	2	1	2	2	4	1
43	1	5	0	2	3	0	2	1	0	0	2	1	2	1	0	0	0	20	0	1	0	2	1	1	2	3	0
44	0	2	0	2	0	1	3	2	1	1	1	3	3	1	0	0	1	20	0	1	1	3	2	3	3	6	1
45	1	1	0	2	4	1	2	2	1	1	1	2	2	1	0	1	0	20	0	1	1	2	2	2	2	4	1
46	1	3	0	2	0	0	1	2	0	0	2	1	2	1	0	0	0	20	0	1	0	1	2	1	2	3	0
47	1	5	0	3	0	1	3	2	1	1	2	3	3	1	0	0	0	20	0	1	0	3	2	3	3	6	0
48	0	5	0	2	4	1	3	2	0	1	1	1	2	1	0	0	1	20	0	1	1	3	2	1	2	3	1
49	0	2	0	3	3	0	3	2	0	0	2	3	3	1	0	0	0	20	0	1	0	3	2	3	3	6	0
50	1	1	0	2	2	0	2	2	0	0	2	2	2	1	0	0	0	20	0	1	0	2	2	2	2	4	0
51	1	5	0	3	1	0	3	2	1	1	2	3	3	1	0	0	0	20	0	1	0	3	2	3	3	6	0
52	0	5	0	1	1	0	3	3	1	0	2	3	3	1	0	0	0	20	0	1	0	3	3	3	3	6	0
53	0	4	0	3	3	1		2	0	1	2	3	3	1	0	0	0	20	0	1	0		2	3	3	6	0
54	1	3	0	2	0	0	2	1	0	0	2	2	2	1	0	0	0	20	0	1	0	2	1	2	2	4	0
55	0	4	0	2	0	1		1	1	1	1	3	3	1	0	0	1	20	0	1	1		1	3	3	6	1
56	1	3	0	3	2	0	3	3	1	0	2	3	3	1	0	0	0	20	0	1	0	3	3	3	3	6	0
57	0	2	0	3	3	0	2	1	0	1	2	2	2	1	0	0	1	20	0	1	1	2	1	2	2	4	1
58	1	1	0	2	2	0	2	2	0	0	2	2	2	1	0	0	0	20	0	1	0	2	2	2	2	4	0
59	1	1	0	4	0	0	3	2	0	0	2	2	2	1	0	0	0	20	0	1	0	3	2	2	2	4	0
60	0	1	0	1	3	0	3	2	1	0	2	3	3	1	0	0	0	20	0	1	0	3	2	3	3	6	0
61	0	1	0	3	4	0	3	2	1	1	2	3	1	1	1	0	0	20	0	1	1	3	2	3	1	4	1
62	1	5	0	2	1	0	3	2	1	1	2	2	2	1	0	0	0	20	0	1	0	3	2	2	2	4	0
63	1	2	0	3	0	0	3	2	0	0	2	2	2	1	0	0	0	20	0	1	0	3	2	2	2	4	0
64	0	5	0	2	0	1	3	2	1	1	1	2	2	1	0	0	0	20	0	1	0	3	2	2	2	4	0
65	0	4	0	2	3	1		1	1	1	1	3	3	1	0	0	1	20	0	1	1		1	3	3	6	1
66	1	1	0	3	0	0	3	2	0	0	2	2	2	1	0	0	0	20	0	1	0	3	2	2	2	4	0
67	1	1	0	3	0	0	3	3	0	1	2	3	3	1	0	0	0	20	0	1	0	3	3	3	3	6	0
68	1	1	0	4	2	0	3	2	0	1	2	2	2	1	0	0	0	20	0	1	0	3	2	2	2	4	0
69	0	5	0	2	3	0	2	1	0	0	2	2	1	1	0	0	0	20	0	1	0	2	1	2	1	3	0
70	0	5	0	1	1	0	3	3	1	0	2	3	3	1	0	0	0	20	0	1	0	3	3	3	3	6	0
71	0	4	0	3	3	0		1	1	1	1	3	3	1	0	0	1	20	0	1	1		1	3	3	6	1
72	1	3	0	2	1	1	2	2	0	1	1	2	2	1	0	0	1	20	0	1	1	2	2	2	2	4	1
73	1	3	0	3	1	0	4	1	0	0	2	4	3	1	0	0	0	20	0	1	0	3	1	3	3	6	0
74	1	3	0	3	4	0	3	3	0	0	2	3	2	1	0	0	0	20	0	1	0	3	3	3	2	5	0
75	1	4	0	3	1	0	3	2	0	1	2	3	3	1	0	0	0	20	0	1	0	3	2	3	3	6	0
76	0	1	0	4	1	0	3	3	0	0	2	3	3	1	0	0	0	20	0	1	0	3	3	3	3	6	0
77	0	4	0	3	0	0	3	2	0	0	2	3	2	1	0	0	0	20	0	1	0	3	2	3	2	5	0
78	0	3	0	1	0	1	1	2	1	1	1	1	2	1	0	0	1	20	0	1	1	1	2	1	2	3	1
79	1	4	0	1	2	0	2	1	0	0	2	2	2	1	0	0	0	20	0	1	0	2	1	2	2	4	0
80	0	5	0	2	1	0	2	1	1	0	2	2	2	1	0	0	0	20	0	1	0	2	1	2	2	4	0
81	1	3	0	3	0	1	3	3	0	0	2	3	2	1	0	0	0	20	0	1	0	3	3	3	2	5	0
82	1	5	0	3	1	0	3	3	1	1	2	3	3	1	0	0	0	20	0	1	0	3	3	3	3	6	0
83	0	2	0	2	3	0	3	2	0	1	2	3	2	1	0	0	1	20	0	1	1	3	2	3	2	5	1
84	1	2	0	3	2	0	3	3	1	0	2	3	3	1	0	0	0	20	0	1	0	3	3	3	3	6	0
85	0	3	0	3	1	0	3	3	0	0	2	3	2	1	0	0	0	20	0	1	0	3	3	3	2	5	0
86	0	2	0	1	3	1	3	2	0	1	1	3	2	1	0	0	1	20	0	1	1	3	2	3	2	5	1
87	0	1	0	2	1	1	2	2	0	1	0	2	2	1	1	0	0	20	0	1	1	2	2	2	2	4	1
88	0	3	0	2	0	1		2	0	1	2	3	3	1	1	0	0	20	0	1	1		2	3	3	6	1
89	0	2	0	2	3	1	3	2	1	1	1	3	3	1	0	0	1	20	0	1	1	3	2	3	3	6	1
90	0	5	0	1	0	1	2	1	0	0	2	2	2	1	0	0	0	20	0	1	0	2	1	2	2	4	0
91	1	2	0	3	0	0	3	2	1	0	2	3	3	1	0	0	0	20	0	1	0	3	2	3	3	6	0
92	0	4	0	3	3	1		1	1	1	2	3	3	1	1	0	0	20	1	1	1		1	3	3	6	2
93	1	2	0	4	0	0	3	3	0	0	2	3	3	1	0	0	0	20	0	1	0	3	3	3	3	6	0
94	1	1	0	2	2	0	2	2	0	0	2	2	2	1	0	0	0	20	0	1	0	2	2	2	2	4	0
95	0	5	0	2	0	1	3	2	1	1	1	2	2	1	0	0	0	20	0	1	0	3	2	2	2	4	0
96	1	1	0	3	0	0	3	2	0	0	2	2	2	1	0	0	0	20	0	1	0	3	2	2	2	4	0
97	0	3	0	2	0	0	3	1	1	0	2	3	2	1	0	0	1	20	0	1	1	3	1	3	2	5	1
98	1	3	0	2	2	0		2	0	0	2	3	3	1	0	0	0	20	0	1	0		2	3	3	6	0
99	1	4	0	1	1	1		2	1	1	1	3	3	1	0	0	1	20	0	1	1		2	3	3	6	1
100	1	1	0	3	0	0	3	2	0	0	2	2	2	1	0	0	0	20	0	1	0	3	2	2	2	4	0
101	1	1	0	3	0	0	3	3	0	1	2	3	3	1	0	0	0	20	0	1	0	3	3	3	3	6	0
102	1	1	0	4	2	0	3	2	0	0	2	3	3	1	0	0	0	20	0	1	0	3	2	3	3	6	0
103	1	3	0	4	0	1	3	3	0	0	2	3	3	1	0	0	0	20	0	1	0	3	3	3	3	6	0
104	1	2	0	2	1	1	1	2	1	1	1	2	2	1	0	0	1	20	0	1	1	1	2	2	2	4	1
105	1	1	0	3	2	0	3	2	0	0	2	3	3	1	0	0	0	20	0	1	0	3	2	3	3	6	0
106	1	5	0	2	4	0	3	3	0	0	2	3	2	1	0	0	0	20	0	1	0	3	3	3	2	5	0
107	1	1	0	3	2	0	3	2	0	0	2	3	3	1	0	0	0	20	0	1	0	3	2	3	3	6	0
108	0	5	0	1	3	1	2	1	0	1	1	2	2	1	0	0	1	20	0	1	1	2	1	2	2	4	1
109	1	1	0	3	0	0	3	3	0	1	2	3	3	1	0	0	0	20	0	1	0	3	3	3	3	6	0
110	0	2	0	3	0	1	3	3	1	1	1	3	3	1	0	0	1	20	0	1	1	3	3	3	3	6	1
111	0	5	0	2	3	0	3	2	1	0	1	2	2	1	1	0	0	20	0	1	1	3	2	2	2	4	1
112	0	1	0	2	3	0	3	1	0	1	2	3	3	1	1	0	0	20	0	1	1	3	1	3	3	6	1
113	1	4	0	2	2	0	2	2	1	1	2	2	2	1	1	0	0	20	0	1	1	2	2	2	2	4	1
114	1	1	0	3	0	0	3	3	0	1	2	3	3	1	0	0	0	20	0	1	0	3	3	3	3	6	0
115	1	1	0	3	0	0	3	2	0	0	2	3	3	1	0	0	0	20	0	1	0	3	2	3	3	6	0
116	0	2	0	3	3	1	2	2	1	1	2	3	3	1	1	0	0	20	0	1	1	2	2	3	3	6	1
117	1	5	0	3	1	0	3	3	1	1	2	3	2	1	0	0	0	20	0	1	0	3	3	3	2	5	0
118	0	3	0	3	1	0	3	3	0	0	2	3	3	1	1	0	0	20	0	1	1	3	3	3	3	6	1
119	1	2	0	3	4	0	3	3	0	0	2	3	3	1	0	0	0	20	0	1	0	3	3	3	3	6	0
120	1	1	0	4	2	0	3	2	0	0	2	3	2	1	0	0	0	20	0	1	0	3	2	3	2	5	0
121	0	5	0	2	0	1	3	2	1	1	1	2	2	1	0	0	0	20	0	1	0	3	2	2	2	4	0
122	0	4	0	2	0	0	3	1	0	0	2	3	2	1	0	0	0	20	0	1	0	3	1	3	2	5	0
123	0	5	0	3	4	0	3	3	0	1	2	3	3	1	0	0	0	20	0	1	0	3	3	3	3	6	0
124	1	2	0	3	0	0	3	2	0	0	2	2	2	1	0	0	0	20	0	1	0	3	2	2	2	4	0
125	0	4	0	2	1	0	2	1	0	0	2	2	1	1	0	0	0	20	0	1	0	2	1	2	1	3	0
126	1	4	0	1	2	0	2	1	0	0	2	2	2	1	0	0	0	20	0	1	0	2	1	2	2	4	0
127	1	5	0	3	1	0	3	2	1	1	2	1	2	1	0	0	0	20	0	1	0	3	2	1	2	3	0
128	1	4	0	1	1	1		2	1	1	1	3	3	1	0	0	1	20	0	1	1		2	3	3	6	1
129	0	5	0	3	1	0	3	3	1	1	2	3	3	1	0	0	0	20	0	1	0	3	3	3	3	6	0
130	0	5	0	2	0	1	3	2	1	1	1	2	2	1	0	0	0	20	0	1	0	3	2	2	2	4	0
131	0	3	0	1	0	0	1	2	0	0	2	1	2	1	0	0	0	20	0	1	0	1	2	1	2	3	0
132	1	3	0	2	0	0	2	1	0	0	2	2	2	1	0	0	0	20	0	1	0	2	1	2	2	4	0
133	0	5	0	3	0	1	2	1	0	1	2	1	2	1	0	0	0	20	1	1	0	2	1	1	2	3	1
134	1	1	0	3	0	0	3	2	1	0	2	3	3	1	0	0	0	20	0	1	0	3	2	3	3	6	0
135	1	3	0	2	2	0		2	1	1	2	3	3	1	0	0	1	20	0	1	1		2	3	3	6	1
136	0	4	0	2	0	0	3	1	0	0	2	3	3	1	0	0	0	20	0	1	0	3	1	3	3	6	0
137	0	5	0	2	0	1	3	2	0	1	1	2	2	1	0	0	0	20	0	1	0	3	2	2	2	4	0
138	0	5	0	1	3	1	2	2	0	1	1	2	2	1	0	0	1	20	0	1	1	2	2	2	2	4	1
139	0	4	0	1	0	1	2	1	1	1	1	3	2	1	0	0	0	20	1	1	0	2	1	3	2	5	1
140	0	2	0	1	3	0	2	2	1	0	2	2	2	1	0	0	0	20	0	1	0	2	2	2	2	4	0
141	1	2	0	3	0	0	3	2	0	0	2	2	2	1	0	0	0	20	0	1	0	3	2	2	2	4	0
142	0	1	0	1	0	0	2	2	0	1	2	2	2	1	0	0	0	20	0	1	0	2	2	2	2	4	0
143	1	1	0	3	0	0	3	2	0	0	2	2	2	1	0	0	0	20	0	1	0	3	2	2	2	4	0
144	0	1	0	3	1	1	3	2	1	1	1	3	3	1	0	0	1	20	0	1	1	3	2	3	3	6	1
145	1	1	0	3	0	0	3	2	0	0	2	3	3	1	0	0	0	20	0	1	0	3	2	3	3	6	0
146	1	1	0	3	1	0	3	2	0	1	2	3	3	1	0	0	0	20	0	1	0	3	2	3	3	6	0
147	0	3	0	2	0	0	3	2	1	0	2	3	2	1	0	0	1	20	0	1	1	3	2	3	2	5	1
148	0	5	0	3	0	1	3	2	0	1	1	3	2	1	0	0	0	20	0	1	0	3	2	3	2	5	0
149	0	3	0	3	0	1	3	3	0	0	2	3	3	1	0	0	0	20	0	1	0	3	3	3	3	6	0
150	0	1	0	3	3	0	3	2	0	1	2	3	3	1	0	0	0	20	0	1	0	3	2	3	3	6	0
151	0	1	0	4	1	0	3	3	0	0	2	3	3	1	0	0	0	20	0	1	0	3	3	3	3	6	0
152	1	1	0	2	4	1	2	2	1	1	1	2	1	1	0	1	0	20	0	1	1	2	2	2	1	3	1
153	0	5	0	3	3	0	3	2	1	1	1	3	2	1	1	0	0	20	0	1	1	3	2	3	2	5	1
154	1	1	0	3	0	0	3	3	0	0	2	3	3	1	0	0	0	20	0	1	0	3	3	3	3	6	0
155	1	4	0	1	0	1	2	1	1	1	1	3	2	1	0	0	0	20	1	1	0	2	1	3	2	5	1
156	0	1	0	1	1	0	2	2	1	0	2	2	2	1	0	0	0	20	0	1	0	2	2	2	2	4	0
157	0	4	0	2	0	0	3	1	0	0	2	3	3	1	0	0	0	20	0	1	0	3	1	3	3	6	0
158	0	1	0	1	4	1	2	1	1	1	1	2	2	1	0	1	0	20	0	1	1	2	1	2	2	4	1
159	1	3	0	3	2	0	3	3	0	0	2	3	3	1	0	0	0	20	0	1	0	3	3	3	3	6	0
160	0	4	0	2	0	1		1	1	1	1	3	3	1	0	0	1	20	0	1	1		1	3	3	6	1
161	0	1	0	3	0	0	3	3	0	0	2	3	3	1	1	0	0	20	0	1	1	3	3	3	3	6	1
162	1	3	0	4	0	0	3	3	0	0	2	3	3	1	0	0	0	20	0	1	0	3	3	3	3	6	0
163	0	4	0	1	0	0	2	1	0	1	2	2	2	1	0	0	0	20	0	1	0	2	1	2	2	4	0
164	1	1	0	3	0	0	3	2	0	1	2	3	3	1	0	0	0	20	0	1	0	3	2	3	3	6	0
165	0	2	0	2	0	0	2	1	0	0	2	2	2	1	1	0	0	20	0	1	1	2	1	2	2	4	1
166	0	2	0	2	3	0	3	1	1	1	1	3	3	1	0	0	1	20	0	1	1	3	1	3	3	6	1
167	0	3	0	1	3	0	1	2	1	0	2	1	2	1	1	0	0	20	0	1	1	1	2	1	2	3	1
168	1	2	0	3	0	0	3	2	0	0	2	2	2	1	0	0	0	20	0	1	0	3	2	2	2	4	0
169	1	5	0	2	1	0	3	2	1	0	2	3	3	1	0	0	0	20	0	1	0	3	2	3	3	6	0
170	0	2	0	2	0	1	2	1	0	1	0	2	2	1	1	0	0	20	0	1	1	2	1	2	2	4	1
171	0	4	0	1	3	0		2	1	1	1	3	3	1	1	0	0	20	0	1	1		2	3	3	6	1
172	0	5	0	1	3	1	2	1	0	1	1	2	2	1	0	0	1	20	0	1	1	2	1	2	2	4	1
173	0	4	0	2	0	0	2	2	1	1	1	2	2	1	0	0	1	20	0	1	1	2	2	2	2	4	1
174	0	1	0	2	0	1	2	2	1	1	1	3	3	1	0	0	1	20	0	1	1	2	2	3	3	6	1
175	0	5	0	2	0	1	3	2	1	1	1	2	2	1	0	0	0	20	0	1	0	3	2	2	2	4	0
176	1	2	0	3	2	0	3	2	0	0	2	2	2	1	0	0	0	20	0	1	0	3	2	2	2	4	0
177	0	1	0	4	0	0	3	2	0	0	2	2	2	1	0	0	0	20	0	1	0	3	2	2	2	4	0
178	0	2	0	3	3	1	2	2	1	1	2	3	3	1	1	0	0	20	0	1	1	2	2	3	3	6	1
179	1	5	0	2	1	0	3	2	1	0	2	3	3	1	0	0	0	20	0	1	0	3	2	3	3	6	0
180	0	4	0	3	0	0		2	0	0	2	3	3	1	0	0	0	20	0	1	0		2	3	3	6	0
181	0	4	0	1	0	1	3	1	1	1	1	3	3	1	0	0	0	20	1	1	0	3	1	3	3	6	1
182	0	4	0	4	0	0	2	1	0	1	2	2	2	1	0	0	1	20	0	1	1	2	1	2	2	4	1
183	1	3	0	3	2	0	3	3	0	0	2	3	3	1	0	0	0	20	0	1	0	3	3	3	3	6	0
184	0	1	0	1	3	0	2	2	1	0	2	2	2	1	1	0	0	20	0	1	1	2	2	2	2	4	1
185	1	5	0	2	2	1	3	2	0	1	1	3	2	1	1	0	0	20	0	1	1	3	2	3	2	5	1
186	0	5	0	2	0	1	3	2	0	0	1	2	2	1	0	0	0	20	0	1	0	3	2	2	2	4	0
187	0	2	0	4	3	0	2	1	1	1	2	2	2	1	0	1	0	20	0	1	1	2	1	2	2	4	1
188	1	5	0	4	1	0	3	3	1	1	2	3	3	1	0	0	0	20	0	1	0	3	3	3	3	6	0
189	0	2	0	4	3	0	1	2	1	1	1	1	2	1	1	0	0	20	0	1	1	1	2	1	2	3	1
190	0	2	0	1	3	0	1	2	1	1	2	2	2	1	1	0	0	19	0	1	1	1	2	2	2	4	1
191	0	5	0	4	1	0	3	3	1	1	2	3	3	1	0	0	0	20	0	1	0	3	3	3	3	6	0
192	0	4	0	3	3	0		1	1	1	1	3	3	1	0	0	1	20	0	1	1		1	3	3	6	1
193	1	1	0	3	0	0	3	3	0	0	2	3	3	1	0	0	0	20	0	1	0	3	3	3	3	6	0
194	1	2	0	3	2	0	3	2	0	0	2	2	2	1	0	0	0	20	0	1	0	3	2	2	2	4	0
195	1	1	0	4	1	0	3	2	0	0	2	2	2	1	0	0	0	20	0	1	0	3	2	2	2	4	0
196	1	1	0	1	0	0	2	2	1	0	1	2	2	1	0	0	1	20	0	1	1	2	2	2	2	4	1
197	0	5	0	2	0	1	2	1	0	0	1	1	2	1	0	0	0	20	0	1	0	2	1	1	2	3	0
198	0	4	0	1	3	0		1	1	0	2	3	3	1	0	0	0	20	0	1	0		1	3	3	6	0
199	0	1	0	4	1	0	3	1	0	0	2	3	2	1	0	0	0	20	0	1	0	3	1	3	2	5	0
200	0	5	0	2	0	1	3	2	0	1	2	2	2	1	0	0	0	20	1	1	0	3	2	2	2	4	1
201	1	2	0	3	0	0	3	2	0	0	2	3	3	1	0	0	0	20	0	1	0	3	2	3	3	6	0
202	1	2	0	3	0	0	3	2	0	1	2	2	2	1	0	0	0	20	0	1	0	3	2	2	2	4	0
203	0	3	0	1	0	1	1	2	1	1	1	1	2	1	0	0	1	20	0	1	1	1	2	1	2	3	1
204	0	1	0	4	1	0	3	3	0	0	2	3	3	1	0	0	0	20	0	1	0	3	3	3	3	6	0
205	0	2	0	4	0	0	3	3	0	0	2	3	3	1	0	0	0	20	0	1	0	3	3	3	3	6	0
206	0	5	0	2	1	0	3	2	1	0	2	3	3	1	0	0	0	20	0	1	0	3	2	3	3	6	0
207	0	2	0	4	3	0	2	1	1	1	2	2	2	1	0	1	0	20	0	1	1	2	1	2	2	4	1
208	1	1	0	1	1	1	2	2	0	1	1	2	2	1	0	0	1	20	0	1	1	2	2	2	2	4	1
209	1	3	0	2	2	0	3	1	0	0	2	3	3	1	0	0	0	20	0	1	0	3	1	3	3	6	0
210	0	4	0	2	0	0	3	1	0	0	2	3	3	1	0	0	0	20	0	1	0	3	1	3	3	6	0
211	1	1	0	1	0	1	2	2	0	0	2	2	2	1	1	0	0	20	0	1	1	2	2	2	2	4	1
212	0	2	0	3	4	0	3	3	0	0	2	3	3	1	0	0	0	20	0	1	0	3	3	3	3	6	0
213	0	4	0	1	0	0		2	0	1	2	3	3	1	0	0	1	20	0	1	1		2	3	3	6	1
214	1	5	0	2	1	0	2	1	1	0	2	2	2	1	0	0	0	20	0	1	0	2	1	2	2	4	0
215	1	2	0	3	0	0	3	2	0	0	2	2	2	1	0	0	0	20	0	1	0	3	2	2	2	4	0
216	0	4	0	3	3	1		1	1	1	2	3	3	1	1	0	0	20	0	1	1		1	3	3	6	1
217	1	4	0	1	2	0	2	1	0	0	2	2	2	1	0	0	0	20	0	1	0	2	1	2	2	4	0
218	1	3	0	2	2	0		2	1	1	2	3	3	1	0	0	1	20	0	1	1		2	3	3	6	1
219	1	5	0	2	3	0	1	2	1	1	1	2	2	1	1	0	0	20	0	1	1	1	2	2	2	4	1
220	1	3	0	1	0	0	2	1	0	0	2	2	2	1	0	0	0	20	0	1	0	2	1	2	2	4	0
221	1	2	0	3	3	0	3	2	0	0	2	3	3	1	0	0	0	20	0	1	0	3	2	3	3	6	0
222	0	3	0	1	3	0	1	2	1	0	2	1	2	1	1	0	0	20	0	1	1	1	2	1	2	3	1
223	1	1	0	2	2	0	2	2	0	0	2	2	2	1	0	0	0	20	0	1	0	2	2	2	2	4	0
224	1	3	0	2	2	0		2	0	0	2	3	3	1	0	0	0	20	0	1	0		2	3	3	6	0
225	1	2	0	3	0	0	3	2	0	0	2	2	2	1	0	0	0	20	0	1	0	3	2	2	2	4	0
226	1	1	0	3	0	0	3	2	0	0	2	3	3	1	0	0	0	20	0	1	0	3	2	3	3	6	0
227	1	3	0	1	1	1	1	2	1	1	1	1	2	1	0	0	1	20	0	1	1	1	2	1	2	3	1
228	1	2	0	4	0	0	3	2	0	0	2	3	2	1	0	0	0	20	0	1	0	3	2	3	2	5	0
229	1	1	0	3	1	0	3	2	0	1	2	3	3	1	0	0	0	20	0	1	0	3	2	3	3	6	0
230	0	1	0	1	3	0	2	2	1	0	2	2	2	1	0	0	0	20	0	1	0	2	2	2	2	4	0
231	0	5	0	1	3	1	2	1	0	1	1	2	2	1	0	0	1	20	0	1	1	2	1	2	2	4	1
232	0	5	0	1	3	1	2	2	0	1	1	2	2	1	0	0	1	20	0	1	1	2	2	2	2	4	1
233	0	5	0	3	1	0	3	3	1	1	2	3	3	1	0	0	0	20	0	1	0	3	3	3	3	6	0
234	0	1	0	3	0	0	3	3	0	1	2	3	3	1	0	0	0	20	0	1	0	3	3	3	3	6	0
235	0	5	0	1	3	1	2	1	0	1	1	2	2	1	0	0	1	20	0	1	1	2	1	2	2	4	1
236	1	1	0	3	0	0	3	3	0	1	2	3	3	1	0	0	0	20	0	1	0	3	3	3	3	6	0
237	0	1	0	4	0	0	3	2	0	0	2	2	2	1	0	0	0	20	0	1	0	3	2	2	2	4	0
238	1	3	0	1	0	0	2	1	0	0	2	2	2	1	0	0	0	20	0	1	0	2	1	2	2	4	0
239	0	2	0	2	3	0	3	2	0	1	2	3	2	1	0	0	1	20	0	1	1	3	2	3	2	5	1
240	1	3	0	1	2	0	1	1	1	0	2	1	1	1	0	0	0	20	0	1	0	1	1	1	1	2	0
241	0	2	0	3	1	0	3	2	0	1	2	2	2	1	0	0	0	20	0	1	0	3	2	2	2	4	0
242	1	1	0	3	2	0	3	2	0	0	2	3	3	1	0	0	0	20	0	1	0	3	2	3	3	6	0
243	0	1	0	4	0	0	3	2	0	0	2	2	2	1	0	0	0	20	0	1	0	3	2	2	2	4	0
244	1	1	0	3	4	0	3	3	0	1	2	3	3	1	0	0	0	20	0	1	0	3	3	3	3	6	0
245	1	2	0	4	0	0	3	3	0	0	2	3	3	1	0	0	0	20	0	1	0	3	3	3	3	6	0
246	1	3	0	2	2	0		2	1	1	2	3	3	1	0	0	1	20	0	1	1		2	3	3	6	1
247	0	3	0	3	4	0	3	3	0	0	2	3	2	1	0	0	0	20	0	1	0	3	3	3	2	5	0
248	1	2	0	2	2	1	3	2	1	1	1	2	2	1	0	0	1	20	0	1	1	3	2	2	2	4	1
249	1	3	0	4	0	0	3	3	0	0	2	3	3	1	0	0	0	20	0	1	0	3	3	3	3	6	0
250	1	1	0	3	2	0	3	1	0	1	2	3	3	1	0	0	0	20	0	1	0	3	1	3	3	6	0
251	0	1	0	3	3	0	3	2	1	0	2	3	3	1	0	0	0	20	0	1	0	3	2	3	3	6	0
252	1	3	0	3	0	0	3	3	0	1	2	3	2	1	1	0	0	20	0	1	1	3	3	3	2	5	1
253	0	1	0	3	0	0	3	2	0	1	2	3	3	1	0	0	0	20	0	1	0	3	2	3	3	6	0
254	0	5	0	2	1	0	2	1	1	0	2	2	2	1	0	0	0	20	0	1	0	2	1	2	2	4	0
255	1	4	0	3	1	0		2	0	1	2	3	3	1	0	0	0	20	0	1	0		2	3	3	6	0
256	1	3	0	3	2	0	3	3	1	0	2	3	3	1	0	0	0	20	0	1	0	3	3	3	3	6	0
257	0	3	0	1	3	0	1	2	1	0	2	1	2	1	1	0	0	20	0	1	1	1	2	1	2	3	1
258	0	2	0	4	0	0	3	3	0	0	2	3	3	1	0	0	0	20	0	1	0	3	3	3	3	6	0
259	1	4	0	3	2	0	3	2	1	1	2	3	3	1	0	0	0	20	0	1	0	3	2	3	3	6	0
260	0	1	0	3	4	0	3	3	0	1	2	3	3	1	0	0	0	20	0	1	0	3	3	3	3	6	0
261	0	5	0	1	1	0	3	3	1	0	2	3	3	1	0	0	0	20	0	1	0	3	3	3	3	6	0
262	0	4	0	2	1	0	2	1	0	0	2	2	1	1	0	0	0	20	0	1	0	2	1	2	1	3	0
263	0	2	0	1	3	0	1	2	1	1	1	2	2	1	1	0	0	20	0	1	1	1	2	2	2	4	1
264	0	4	0	2	3	1	2	1	1	1	1	2	2	1	0	1	0	20	0	1	1	2	1	2	2	4	1
265	1	2	0	3	0	0	3	2	0	1	2	2	2	1	0	0	0	20	0	1	0	3	2	2	2	4	0
266	0	5	0	1	0	1	2	1	0	1	2	2	2	1	0	0	0	20	0	1	0	2	1	2	2	4	0
267	0	5	0	2	0	1	3	2	0	0	1	2	2	1	0	0	0	20	0	1	0	3	2	2	2	4	0
268	1	2	0	3	0	0	3	3	0	0	2	3	3	1	0	0	0	20	0	1	0	3	3	3	3	6	0
269	1	2	0	3	2	0	3	2	0	0	2	2	2	1	0	0	0	20	0	1	0	3	2	2	2	4	0
270	1	3	0	2	2	0	3	1	0	0	2	3	3	1	0	0	0	20	0	1	0	3	1	3	3	6	0
271	0	3	0	1	3	0	1	2	1	1	2	1	2	1	1	0	0	20	0	1	1	1	2	1	2	3	1
272	0	4	0	1	0	1	2	1	0	1	1	3	3	1	0	0	0	20	1	1	0	2	1	3	3	6	1
273	1	4	0	2	2	0	2	2	1	1	2	2	2	1	1	0	0	20	0	1	1	2	2	2	2	4	1
274	0	1	0	2	4	0	2	2	0	0	2	2	2	1	0	0	1	20	0	1	1	2	2	2	2	4	1
275	1	2	0	4	0	0	3	3	0	0	2	3	3	1	0	0	0	20	0	1	0	3	3	3	3	6	0
276	0	1	0	2	3	1	2	2	1	1	2	3	3	1	1	0	0	20	0	1	1	2	2	3	3	6	1
277	0	2	0	2	0	1	3	2	1	1	1	3	2	1	0	0	1	20	0	1	1	3	2	3	2	5	1
278	0	2	0	1	3	0	1	2	1	1	2	2	2	1	1	0	0	20	0	1	1	1	2	2	2	4	1
279	1	2	0	3	2	0	3	3	0	0	2	3	3	1	0	0	0	20	0	1	0	3	3	3	3	6	0
280	1	2	0	4	0	0	3	3	0	0	2	3	3	1	0	0	0	20	0	1	0	3	3	3	3	6	0
281	0	3	0	1	0	0	3	2	1	0	2	3	2	1	1	0	0	20	0	1	1	3	2	3	2	5	1
282	1	5	0	3	1	0	3	2	1	1	2	3	3	1	0	0	0	20	0	1	0	3	2	3	3	6	0
283	0	5	0	1	3	1	2	2	0	1	1	2	2	1	0	0	1	20	0	1	1	2	2	2	2	4	1
284	1	4	0	3	0	0	3	3	0	1	2	3	2	1	1	0	0	20	0	1	1	3	3	3	2	5	1
285	0	2	0	3	0	1	3	3	1	1	1	3	3	1	0	0	1	20	0	1	1	3	3	3	3	6	1
286	0	5	0	1	3	1	2	1	0	1	1	2	2	1	0	0	1	20	0	1	1	2	1	2	2	4	1
287	0	4	0	3	3	1		1	1	1	2	3	3	1	1	0	0	20	0	1	1		1	3	3	6	1
288	1	3	0	3	0	1	3	3	1	1	1	3	3	1	0	0	0	20	1	1	0	3	3	3	3	6	1
289	1	2	0	4	0	0	3	3	0	0	2	3	3	1	0	0	0	20	0	1	0	3	3	3	3	6	0
290	1	4	0	3	2	0	3	2	0	0	2	3	2	1	0	0	0	20	0	1	0	3	2	3	2	5	0
291	0	1	0	2	3	1	2	2	1	1	2	3	3	1	1	0	0	20	0	1	1	2	2	3	3	6	1
292	0	1	0	2	4	0	2	2	0	0	2	2	2	1	0	0	1	20	0	1	1	2	2	2	2	4	1
293	1	4	0	2	0	1	2	1	1	0	2	2	1	1	0	0	0	20	0	1	0	2	1	2	1	3	0
294	0	3	0	3	0	1	3	2	1	1	1	3	2	1	0	0	0	20	1	1	0	3	2	3	2	5	1
295	1	3	0	3	2	0	3	3	0	0	2	3	3	1	0	0	0	20	0	1	0	3	3	3	3	6	0
296	1	1	0	4	0	0	3	3	0	0	2	3	3	1	0	0	0	20	0	1	0	3	3	3	3	6	0
297	1	4	0	3	2	0	3	2	0	1	2	3	3	1	0	0	0	20	0	1	0	3	2	3	3	6	0
298	1	2	0	4	0	0	3	3	0	0	2	3	3	1	0	0	0	20	0	1	0	3	3	3	3	6	0
299	0	2	0	3	3	1	3	2	1	1	2	3	3	1	1	0	0	20	0	1	1	3	2	3	3	6	1
300	1	3	0	2	1	1	2	1	0	1	1	2	1	1	0	0	1	20	0	1	1	2	1	2	1	3	1
301	0	5	0	2	0	1	3	2	0	1	2	2	2	1	0	0	0	20	1	1	0	3	2	2	2	4	1
302	0	2	0	2	0	1	3	2	1	1	1	3	2	1	0	0	1	20	0	1	1	3	2	3	2	5	1
303	0	2	0	3	3	1	3	2	1	1	2	3	3	1	1	0	0	20	0	1	1	3	2	3	3	6	1
304	0	1	0	1	3	0	4	2	1	0	2	3	3	1	0	0	0	20	0	1	0	3	2	3	3	6	0
305	1	5	0	3	1	0	3	3	1	1	2	3	3	1	0	0	0	20	0	1	0	3	3	3	3	6	0
306	0	5	0	1	0	1	2	1	0	0	2	2	2	1	0	0	0	20	0	1	0	2	1	2	2	4	0
307	0	2	0	4	0	0	3	3	0	0	2	3	3	1	0	0	0	20	0	1	0	3	3	3	3	6	0
308	0	4	0	1	3	0		1	1	0	2	3	3	1	0	0	0	20	0	1	0		1	3	3	6	0
309	1	3	0	1	0	0	2	1	0	0	2	2	2	1	0	0	0	20	0	1	0	2	1	2	2	4	0
310	1	4	0	3	2	1	3	2	0	1	2	3	2	1	0	0	0	20	0	1	0	3	2	3	2	5	0
311	0	2	0	4	3	0	2	1	1	1	2	2	2	1	0	1	0	20	0	1	1	2	1	2	2	4	1
312	0	4	0	2	3	1		1	1	1	1	3	3	1	0	0	1	20	0	1	1		1	3	3	6	1
313	1	4	0	2	0	1	2	1	1	0	2	2	1	1	0	0	0	20	0	1	0	2	1	2	1	3	0
314	1	1	0	4	2	0	3	2	1	0	2	2	2	1	0	0	0	20	0	1	0	3	2	2	2	4	0
315	1	5	0	3	0	1	3	2	1	1	2	3	3	1	0	0	0	20	0	1	0	3	2	3	3	6	0
316	1	2	0	4	0	0	3	3	0	0	2	3	3	1	0	0	0	20	0	1	0	3	3	3	3	6	0
317	1	1	0	4	0	0	3	2	0	0	2	2	2	1	0	0	0	20	0	1	0	3	2	2	2	4	0
318	0	4	0	3	3	1		1	1	1	2	3	3	1	1	0	0	20	0	1	1		1	3	3	6	1
319	0	4	0	1	0	1	2	1	0	1	1	3	2	1	0	0	0	20	1	1	0	2	1	3	2	5	1
320	1	1	0	3	0	0	3	2	0	0	2	3	3	1	0	0	0	20	0	1	0	3	2	3	3	6	0
321	1	4	0	2	1	1		1	1	1	1	3	3	1	0	0	1	20	0	1	1		1	3	3	6	1
322	1	5	0	3	1	0	2	2	1	0	2	2	2	1	0	0	0	20	0	1	0	2	2	2	2	4	0
323	0	4	0	2	0	1		1	1	1	1	3	3	1	0	0	1	20	0	1	1		1	3	3	6	1
324	1	1	0	3	0	0	3	2	0	1	2	3	3	1	0	0	0	20	0	1	0	3	2	3	3	6	0
325	0	4	0	1	0	1	2	1	0	1	1	3	3	1	0	0	0	20	1	1	0	2	1	3	3	6	1
326	0	3	0	2	0	1		2	1	1	1	3	3	1	0	0	1	20	0	1	1		2	3	3	6	1
327	0	4	0	2	3	0		1	1	0	1	3	3	1	1	0	0	20	0	1	1		1	3	3	6	1
328	0	4	0	2	0	0	3	1	0	0	2	3	2	1	0	0	0	20	0	1	0	3	1	3	2	5	0
329	0	5	0	2	4	0	3	2	0	0	2	2	2	1	0	0	0	20	0	1	0	3	2	2	2	4	0
330	0	4	0	2	0	0		1	0	1	2	3	3	1	0	0	1	20	0	1	1		1	3	3	6	1
331	1	3	0	4	0	0	3	3	0	0	2	3	3	1	0	0	0	20	0	1	0	3	3	3	3	6	0
332	0	5	0	2	0	1	3	2	1	1	1	2	2	1	1	0	0	20	0	1	1	3	2	2	2	4	1
333	1	3	0	2	2	0		2	0	0	2	3	3	1	0	0	0	20	0	1	0		2	3	3	6	0
334	1	3	0	3	2	0	3	3	0	0	2	3	3	1	0	0	0	20	0	1	0	3	3	3	3	6	0
335	0	2	0	3	1	1	3	3	1	1	2	2	2	1	0	0	0	20	0	1	0	3	3	2	2	4	0
336	0	2	0	3	1	0	3	2	0	1	2	2	2	1	0	0	0	20	0	1	0	3	2	2	2	4	0
337	0	3	0	3	0	1	3	2	1	1	1	3	2	1	0	0	0	20	1	1	0	3	2	3	2	5	1
338	0	3	0	3	0	0	2	3	0	0	2	3	3	1	0	0	0	20	0	1	0	2	3	3	3	6	0
339	0	4	0	1	3	0		2	0	1	2	3	3	1	0	0	1	20	0	1	1		2	3	3	6	1
340	1	3	0	4	0	0	3	3	0	0	2	3	3	1	0	0	0	20	0	1	0	3	3	3	3	6	0
341	0	2	0	2	3	1	3	2	0	0	2	2	2	1	1	0	0	20	0	1	1	3	2	2	2	4	1
342	1	1	0	2	2	1	2	2	0	0	2	2	2	1	1	0	0	20	0	1	1	2	2	2	2	4	1
343	0	4	0	3	0	1		2	1	1	2	3	3	1	0	0	0	20	0	1	0		2	3	3	6	0
344	0	2	0	4	3	1	1	2	0	0	2	1	2	1	1	0	0	20	0	1	1	1	2	1	2	3	1
345	0	5	0	2	0	1	3	2	1	1	1	2	2	1	0	0	0	20	0	1	0	3	2	2	2	4	0
346	1	1	0	3	0	0	3	1	0	0	2	3	3	1	0	0	0	20	0	1	0	3	1	3	3	6	0
347	0	2	0	2	3	0	2	1	1	1	2	2	2	1	0	1	0	20	0	1	1	2	1	2	2	4	1
348	1	2	0	3	0	0	3	2	0	0	2	2	2	1	0	0	0	20	0	1	0	3	2	2	2	4	0
349	1	3	0	1	2	0	1	1	1	0	2	1	1	1	0	0	0	20	0	1	0	1	1	1	1	2	0
350	1	4	0	1	2	0	2	1	0	0	2	2	2	1	0	0	0	20	0	1	0	2	1	2	2	4	0
351	1	1	0	3	0	0	3	2	1	0	2	3	3	1	0	0	0	20	0	1	0	3	2	3	3	6	0
352	1	4	0	3	2	0	3	2	0	0	2	3	2	1	0	0	0	20	0	1	0	3	2	3	2	5	0
353	1	2	0	3	0	0	3	2	0	0	2	2	2	1	0	0	0	20	0	1	0	3	2	2	2	4	0
354	1	1	0	3	0	0	3	3	0	0	2	3	3	1	0	0	0	20	0	1	0	3	3	3	3	6	0
355	0	4	0	2	0	1		1	1	1	1	3	3	1	0	0	1	20	0	1	1		1	3	3	6	1
356	1	3	0	4	0	1	3	3	0	0	2	3	3	1	0	0	0	20	0	1	0	3	3	3	3	6	0
357	0	1	0	1	3	0	2	2	1	1	2	2	2	1	1	0	0	20	0	1	1	2	2	2	2	4	1
358	1	4	0	3	2	0	3	2	0	1	2	3	3	1	0	0	0	20	0	1	0	3	2	3	3	6	0
359	1	3	0	2	0	0	2	1	0	0	2	2	2	1	0	0	0	20	0	1	0	2	1	2	2	4	0
360	1	1	0	3	0	0	3	3	1	1	2	4	2	1	1	0	0	20	0	1	1	3	3	3	2	5	1
361	0	5	0	1	1	0	2	1	1	0	2	2	2	1	0	0	0	20	0	1	0	2	1	2	2	4	0
362	1	1	0	1	1	1	2	2	0	1	1	2	2	1	0	0	1	20	0	1	1	2	2	2	2	4	1
363	0	4	0	2	3	0		1	1	1	1	3	3	1	1	0	0	20	0	1	1		1	3	3	6	1
364	1	2	0	4	0	0	3	3	0	0	2	3	3	1	0	0	0	20	0	1	0	3	3	3	3	6	0
365	1	2	0	3	2	0	3	2	0	0	2	2	2	1	0	0	0	20	0	1	0	3	2	2	2	4	0
366	0	1	0	3	3	0	3	3	1	0	2	3	3	1	1	0	0	20	0	1	1	3	3	3	3	6	1
367	0	4	0	1	3	0		2	1	0	1	3	3	1	1	0	0	20	0	1	1		2	3	3	6	1
368	1	2	0	3	0	0	3	2	0	0	2	3	3	1	0	0	0	20	0	1	0	3	2	3	3	6	0
369	1	4	0	3	3	0	2	2	0	0	2	2	2	1	0	0	0	20	0	1	0	2	2	2	2	4	0
370	0	3	0	2	0	0	3	3	0	0	2	2	3	1	1	0	0	20	0	1	1	3	3	2	3	5	1
371	0	3	0	1	0	0	3	2	1	0	2	3	2	1	1	0	0	20	0	1	1	3	2	3	2	5	1
372	1	3	0	3	0	0	3	3	0	1	2	3	2	1	1	0	0	20	0	1	1	3	3	3	2	5	1
373	1	3	0	2	0	0	2	1	0	0	2	2	2	1	0	0	0	20	0	1	0	2	1	2	2	4	0
374	0	1	0	1	3	0	2	2	0	1	1	2	2	1	1	0	0	20	0	1	1	2	2	2	2	4	1
375	0	3	0	3	3	1	3	3	1	1	2	3	3	1	1	0	0	20	0	1	1	3	3	3	3	6	1
376	1	4	0	1	2	0	2	1	0	0	2	2	2	1	0	0	0	20	0	1	0	2	1	2	2	4	0
377	1	1	0	4	0	0	3	2	0	0	2	2	2	1	0	0	0	20	0	1	0	3	2	2	2	4	0
378	1	2	0	1	0	1	2	2	0	1	2	2	2	1	1	0	0	20	0	1	1	2	2	2	2	4	1
379	1	3	0	3	1	0	4	1	0	0	2	4	4	1	0	0	0	20	0	1	0	3	1	3	3	6	0
380	0	4	0	1	0	1	3	1	1	1	1	3	3	1	0	0	0	20	1	1	0	3	1	3	3	6	1
381	0	1	0	1	3	0	2	2	0	0	2	2	2	1	1	0	0	20	0	1	1	2	2	2	2	4	1
382	0	2	0	3	3	1	2	3	1	1	2	3	3	1	1	0	0	20	0	1	1	2	3	3	3	6	1
383	0	1	0	3	0	0	4	2	1	1	2	4	2	1	1	0	0	20	0	1	1	3	2	3	2	5	1
384	1	1	0	3	0	0	3	2	1	0	2	3	3	1	0	0	0	20	0	1	0	3	2	3	3	6	0
385	0	4	0	3	1	0	3	2	0	0	2	3	2	1	0	0	0	20	0	1	0	3	2	3	2	5	0
386	0	5	0	2	0	1	2	1	0	0	1	2	2	1	0	0	0	20	0	1	0	2	1	2	2	4	0
387	1	4	0	1	0	0	2	1	0	1	2	2	2	1	0	0	0	20	0	1	0	2	1	2	2	4	0
388	0	1	0	2	0	0	3	1	1	1	1	3	2	1	0	0	1	14	0	1	1	3	1	3	2	5	1
389	1	3	0	2	2	0		2	0	0	2	3	3	1	0	0	0	20	0	1	0		2	3	3	6	0
390	1	4	0	2	2	0	2	1	1	1	2	2	2	1	1	0	0	20	0	1	1	2	1	2	2	4	1
391	1	3	0	2	0	0		2	0	0	2	3	3	1	0	0	0	20	0	1	0		2	3	3	6	0
392	1	1	0	3	2	0	3	2	0	0	2	3	3	1	0	0	0	20	0	1	0	3	2	3	3	6	0
393	1	3	0	2	2	0	3	1	0	0	2	3	3	1	0	0	0	20	0	1	0	3	1	3	3	6	0
394	0	4	0	2	0	0	3	2	0	0	2	3	2	1	0	0	0	20	0	1	0	3	2	3	2	5	0
395	0	1	0	1	3	0	2	2	0	1	1	2	2	1	1	0	0	20	0	1	1	2	2	2	2	4	1
396	0	4	0	1	0	0		2	0	1	2	3	3	1	0	0	1	20	0	1	1		2	3	3	6	1
397	1	3	0	3	1	0	3	3	0	0	2	3	3	1	0	0	0	20	0	1	0	3	3	3	3	6	0
398	0	4	0	2	0	0	3	1	0	0	2	3	2	1	0	0	0	20	0	1	0	3	1	3	2	5	0
399	1	3	0	2	3	0	2	1	0	1	2	2	2	1	0	0	0	20	0	1	0	2	1	2	2	4	0
400	1	4	0	2	2	0	2	1	0	1	2	2	1	1	0	0	1	20	0	1	1	2	1	2	1	3	1
401	1	1	0	1	0	0	2	2	1	0	1	2	2	1	0	0	1	20	0	1	1	2	2	2	2	4	1
402	0	4	0	3	3	1		1	1	1	2	3	3	1	1	0	0	20	0	1	1		1	3	3	6	1
403	1	2	0	1	4	0	3	2	1	1	1	2	1	1	0	1	0	20	0	1	1	3	2	2	1	3	1
404	1	2	0	3	0	0	3	2	0	0	2	2	2	1	0	0	0	20	0	1	0	3	2	2	2	4	0
405	1	2	0	2	2	0	4	2	1	1	2	3	2	1	0	0	1	20	0	1	1	3	2	3	2	5	1
406	1	1	0	3	0	0	3	3	0	0	2	2	2	1	0	0	0	20	0	1	0	3	3	2	2	4	0
407	1	4	0	2	4	1		2	1	1	1	3	3	1	0	1	0	20	0	1	1		2	3	3	6	1
408	0	2	0	3	3	1	3	2	1	1	2	3	3	1	1	0	0	20	0	1	1	3	2	3	3	6	1
409	0	2	0	3	3	1	3	2	1	1	2	3	3	1	1	0	0	20	1	1	1	3	2	3	3	6	2
410	0	2	0	1	3	0	1	2	1	1	1	2	2	1	0	1	0	20	0	1	1	1	2	2	2	4	1
411	1	1	0	3	1	1	2	2	1	1	1	3	3	1	0	0	1	20	0	1	1	2	2	3	3	6	1
412	1	3	0	3	1	0	3	3	0	0	2	3	3	1	0	0	0	20	0	1	0	3	3	3	3	6	0
413	1	2	0	4	0	0	3	3	1	0	2	3	3	1	0	0	0	20	0	1	0	3	3	3	3	6	0
414	1	1	0	4	2	0	3	2	0	0	2	3	2	1	0	0	0	20	0	1	0	3	2	3	2	5	0
415	0	1	0	3	0	0	3	3	0	0	2	3	3	1	1	0	0	20	0	1	1	3	3	3	3	6	1
416	0	5	0	2	1	0	3	2	1	0	2	3	3	1	0	0	0	20	0	1	0	3	2	3	3	6	0
417	1	5	0	3	3	0	3	2	0	1	2	3	3	1	0	0	0	20	0	1	0	3	2	3	3	6	0
418	1	4	0	1	1	1		2	1	1	1	3	3	1	0	0	1	20	0	1	1		2	3	3	6	1
419	1	3	0	1	0	0	2	2	0	0	2	2	2	1	0	0	0	20	0	1	0	2	2	2	2	4	0
420	0	2	0	2	0	0	3	2	1	1	2	3	2	1	0	0	1	20	0	1	1	3	2	3	2	5	1
421	0	1	0	4	1	0	3	3	0	0	2	3	3	1	0	0	0	20	0	1	0	3	3	3	3	6	0
422	1	2	0	3	0	0	3	2	1	0	2	3	3	1	0	0	0	20	0	1	0	3	2	3	3	6	0
423	0	3	0	2	4	1		2	1	1	0	3	3	1	0	1	0	20	0	1	1		2	3	3	6	1
424	1	1	0	3	0	0	3	2	0	1	2	3	3	1	0	0	0	20	0	1	0	3	2	3	3	6	0
425	0	3	0	1	3	0	1	2	1	0	2	1	2	1	1	0	0	20	0	1	1	1	2	1	2	3	1
426	0	4	0	1	1	0	3	2	0	0	2	2	1	1	0	0	0	20	0	1	0	3	2	2	1	3	0
427	1	1	0	4	2	0	3	3	1	0	2	3	3	1	0	0	0	20	0	1	0	3	3	3	3	6	0
428	0	4	0	2	0	0	2	2	1	0	1	2	2	1	0	0	1	20	0	1	1	2	2	2	2	4	1
429	1	2	0	3	0	0	3	2	0	0	2	2	2	1	0	0	0	20	0	1	0	3	2	2	2	4	0
430	0	2	0	1	3	0	2	2	1	0	2	2	2	1	0	0	0	20	0	1	0	2	2	2	2	4	0
431	0	4	0	3	0	1		1	1	1	1	3	3	1	0	0	1	20	0	1	1		1	3	3	6	1
432	0	4	0	1	0	0	3	3	0	1	2	3	2	1	0	0	1	20	0	1	1	3	3	3	2	5	1
433	1	1	0	3	0	1	3	2	0	1	2	3	3	1	0	0	0	20	0	1	0	3	2	3	3	6	0
434	0	4	0	3	3	1		1	1	1	2	3	3	1	1	0	0	20	0	1	1		1	3	3	6	1
435	1	4	0	3	2	0	3	2	0	1	2	3	3	1	0	0	0	20	0	1	0	3	2	3	3	6	0
436	1	4	0	2	2	0	3	2	0	0	2	3	2	1	0	0	0	20	0	1	0	3	2	3	2	5	0
437	0	4	0	3	0	0		2	0	0	2	3	3	1	0	0	0	20	0	1	0		2	3	3	6	0
438	1	4	0	2	2	0	2	1	1	1	2	2	2	1	1	0	0	20	0	1	1	2	1	2	2	4	1
439	1	3	0	3	0	0	3	3	0	0	2	3	3	1	0	0	0	20	0	1	0	3	3	3	3	6	0
440	1	4	0	1	2	0	1	1	0	0	2	2	2	1	0	0	0	20	0	1	0	1	1	2	2	4	0
441	0	4	0	3	4	1	2	1	1	1	1	2	2	1	0	0	1	20	0	1	1	2	1	2	2	4	1
442	0	3	0	1	1	1	1	2	1	1	1	1	2	1	0	0	1	20	0	1	1	1	2	1	2	3	1
443	0	4	0	3	2	0	3	2	0	0	2	3	2	1	0	0	0	20	0	1	0	3	2	3	2	5	0
444	1	2	0	3	0	0	3	2	0	0	2	3	3	1	0	0	0	20	0	1	0	3	2	3	3	6	0
445	0	4	0	3	1	0	2	2	1	0	2	2	2	1	0	0	0	20	0	1	0	2	2	2	2	4	0
446	1	2	0	3	0	0	3	2	0	0	2	3	3	1	0	0	0	20	0	1	0	3	2	3	3	6	0
447	0	3	0	1	3	0	1	2	1	1	2	1	2	1	1	0	0	20	0	1	1	1	2	1	2	3	1
448	1	2	0	3	0	0	3	3	0	0	2	3	2	1	1	0	0	20	0	1	1	3	3	3	2	5	1
449	0	3	0	1	0	0	1	2	0	1	2	1	2	1	1	0	0	20	0	1	1	1	2	1	2	3	1
450	0	4	0	3	3	1		1	1	1	2	3	3	1	1	0	0	20	0	1	1		1	3	3	6	1
451	1	3	0	3	2	0	3	3	0	0	2	3	3	1	0	0	0	20	0	1	0	3	3	3	3	6	0
452	1	4	0	2	2	0	1	2	0	0	2	2	2	1	0	0	0	20	0	1	0	1	2	2	2	4	0
453	0	1	0	2	3	1	2	2	1	1	2	3	3	1	1	0	0	20	0	1	1	2	2	3	3	6	1
454	0	4	0	1	3	0		2	0	1	2	3	3	1	0	0	1	20	0	1	1		2	3	3	6	1
455	0	4	0	3	3	1		1	1	1	2	3	3	1	1	0	0	20	0	1	1		1	3	3	6	1
456	0	4	0	2	0	1		1	1	1	1	3	3	1	0	0	1	20	0	1	1		1	3	3	6	1
457	0	3	0	1	3	0	3	3	1	0	2	3	3	1	1	0	0	20	0	1	1	3	3	3	3	6	1
458	0	4	0	2	0	1		1	1	1	1	3	3	1	0	0	1	20	0	1	1		1	3	3	6	1
459	0	2	0	2	0	1	3	2	0	0	2	2	2	1	1	0	0	20	0	1	1	3	2	2	2	4	1
460	0	1	0	4	1	0	3	1	0	0	2	3	2	1	0	0	0	20	0	1	0	3	1	3	2	5	0
461	0	1	0	4	0	0	3	2	0	0	2	2	2	1	0	0	0	20	0	1	0	3	2	2	2	4	0
462	1	4	0	2	1	1		1	1	1	1	3	3	1	0	0	1	20	0	1	1		1	3	3	6	1
463	0	4	0	1	3	0		2	0	1	2	3	3	1	0	0	1	20	0	1	1		2	3	3	6	1
464	0	1	0	2	0	1	2	2	1	1	1	3	3	1	0	0	1	20	0	1	1	2	2	3	3	6	1
465	1	4	0	2	2	0	2	1	0	1	2	2	1	1	0	0	1	20	0	1	1	2	1	2	1	3	1
466	1	4	0	3	2	0	3	2	0	1	2	3	3	1	0	0	0	20	0	1	0	3	2	3	3	6	0
467	1	4	0	1	2	0	2	1	0	0	2	2	2	1	0	0	0	20	0	1	0	2	1	2	2	4	0
468	1	2	0	2	2	1	3	2	1	1	1	2	2	1	0	0	1	20	0	1	1	3	2	2	2	4	1
469	0	3	0	4	3	1	1	2	0	1	1	2	3	1	0	0	1	20	0	1	1	1	2	2	3	5	1
470	0	2	0	3	0	1	3	3	1	1	1	3	3	1	0	0	1	20	0	1	1	3	3	3	3	6	1
471	1	2	0	3	0	0	3	2	0	0	2	2	2	1	0	0	0	20	0	1	0	3	2	2	2	4	0
472	0	4	0	1	3	0		1	1	0	2	3	3	1	0	0	0	20	0	1	0		1	3	3	6	0
473	1	4	0	2	4	0	2	2	0	0	2	2	1	1	0	0	0	20	0	1	0	2	2	2	1	3	0
474	0	1	0	1	3	0	2	2	1	0	2	2	2	1	1	0	0	20	0	1	1	2	2	2	2	4	1
475	1	3	0	4	0	0	3	3	0	0	2	3	3	1	0	0	0	20	0	1	0	3	3	3	3	6	0
476	1	1	0	4	0	0	3	2	0	0	2	2	2	1	0	0	0	20	0	1	0	3	2	2	2	4	0
477	1	2	0	3	2	0	3	2	0	0	2	2	2	1	0	0	0	20	0	1	0	3	2	2	2	4	0
478	0	4	0	1	0	0		2	0	1	2	3	3	1	0	0	1	20	0	1	1		2	3	3	6	1
479	0	4	0	2	0	1		1	1	1	1	3	3	1	0	0	1	20	0	1	1		1	3	3	6	1
480	1	1	0	3	0	0	3	3	0	1	2	3	3	1	0	0	0	20	0	1	0	3	3	3	3	6	0
481	0	1	0	3	0	0	3	2	0	1	2	3	3	1	0	0	0	20	0	1	0	3	2	3	3	6	0
482	1	1	0	4	2	0	3	2	0	0	2	3	2	1	0	0	0	20	0	1	0	3	2	3	2	5	0
483	1	2	0	4	0	0	3	3	0	0	2	3	3	1	0	0	0	20	0	1	0	3	3	3	3	6	0
484	0	4	0	2	3	1	2	1	1	1	1	2	2	1	0	1	0	20	0	1	1	2	1	2	2	4	1
485	1	3	0	1	2	0	1	1	1	0	2	1	1	1	0	0	0	20	0	1	0	1	1	1	1	2	0
486	0	4	0	3	1	0	3	2	0	1	2	3	3	1	0	0	0	20	0	1	0	3	2	3	3	6	0
487	0	2	0	1	4	0	3	1	1	1	2	3	2	1	0	1	0	20	0	1	1	3	1	3	2	5	1
488	1	4	0	3	3	0	2	2	0	1	2	2	1	1	0	0	0	20	0	1	0	2	2	2	1	3	0
489	0	4	0	1	3	0		1	1	0	1	3	3	1	1	0	0	20	0	1	1		1	3	3	6	1
490	0	2	0	3	3	0	3	2	1	0	2	3	3	1	1	0	0	20	0	1	1	3	2	3	3	6	1
491	0	4	0	3	3	0		1	1	1	1	3	3	1	0	0	1	20	0	1	1		1	3	3	6	1
492	0	4	0	1	0	0	3	1	1	0	2	3	2	1	1	0	0	20	0	1	1	3	1	3	2	5	1
493	0	4	0	3	0	1		1	1	1	1	3	3	1	0	0	1	20	0	1	1		1	3	3	6	1
494	0	4	0	2	0	1		1	1	1	1	3	3	1	0	0	1	20	0	1	1		1	3	3	6	1
495	1	3	0	3	0	0	3	2	0	0	2	4	2	1	0	0	0	20	0	1	0	3	2	3	2	5	0
496	1	1	0	4	2	0	3	1	0	0	2	3	2	1	0	0	0	20	0	1	0	3	1	3	2	5	0
497	0	2	0	1	3	0	1	2	1	0	1	2	2	1	0	1	0	20	0	1	1	1	2	2	2	4	1
498	1	5	0	2	4	0	3	2	0	0	2	3	3	1	0	0	0	20	0	1	0	3	2	3	3	6	0
499	1	1	0	3	0	0	3	2	0	0	2	2	2	1	0	0	0	20	0	1	0	3	2	2	2	4	0
500	1	4	0	2	2	0	1	2	0	0	2	2	2	1	0	0	0	20	0	1	0	1	2	2	2	4	0
501	0	4	0	1	3	0		2	1	0	1	3	3	1	1	0	0	20	0	1	1		2	3	3	6	1
502	1	3	0	3	2	0	3	3	0	0	2	3	3	1	0	0	0	20	0	1	0	3	3	3	3	6	0
503	1	2	0	3	2	0	3	2	0	0	2	2	2	1	0	0	0	20	0	1	0	3	2	2	2	4	0
504	0	2	0	3	1	1	2	1	1	1	1	2	3	1	0	0	1	20	0	1	1	2	1	2	3	5	1
505	0	5	0	3	3	0	3	2	1	1	1	3	2	1	1	0	0	20	0	1	1	3	2	3	2	5	1
506	1	4	0	3	0	0	3	2	0	0	2	3	2	1	0	0	0	20	0	1	0	3	2	3	2	5	0
507	0	4	0	1	0	1	2	1	0	0	1	2	2	1	0	0	0	20	0	1	0	2	1	2	2	4	0
508	0	3	0	3	3	1	3	3	1	1	2	3	3	1	1	0	0	20	0	1	1	3	3	3	3	6	1
509	0	1	0	2	4	0	2	2	0	0	2	2	2	1	0	0	1	20	0	1	1	2	2	2	2	4	1
510	1	4	0	1	2	0	1	1	0	0	2	2	2	1	0	0	0	20	0	1	0	1	1	2	2	4	0
511	1	2	0	3	2	0	3	3	1	0	2	3	3	1	0	0	0	20	0	1	0	3	3	3	3	6	0
512	0	4	0	1	0	1	2	1	0	1	1	2	2	1	0	0	0	20	0	1	0	2	1	2	2	4	0
513	1	4	0	2	2	0	2	1	1	1	1	2	1	1	0	0	1	20	0	1	1	2	1	2	1	3	1
514	1	3	0	1	4	0	1	2	1	1	1	1	2	1	0	1	0	20	0	1	1	1	2	1	2	3	1
515	1	1	0	3	2	0	3	2	0	0	2	3	3	1	0	0	0	20	0	1	0	3	2	3	3	6	0
516	1	4	0	3	2	0	3	2	0	1	2	3	3	1	0	0	0	20	0	1	0	3	2	3	3	6	0
517	1	3	0	4	0	0	3	3	0	0	2	3	3	1	0	0	0	20	0	1	0	3	3	3	3	6	0
518	1	1	0	4	2	0	3	2	1	0	2	2	2	1	0	0	0	20	0	1	0	3	2	2	2	4	0
519	1	4	0	2	3	0	1	2	0	0	2	2	2	1	0	0	0	20	0	1	0	1	2	2	2	4	0
520	1	2	0	2	2	0	4	2	1	1	2	3	2	1	0	0	1	20	0	1	1	3	2	3	2	5	1
521	1	4	0	1	1	1		2	1	1	1	3	3	1	0	0	1	20	0	1	1		2	3	3	6	1
522	0	1	0	4	1	0	4	4	0	0	2	3	3	1	1	0	0	20	0	1	1	3	3	3	3	6	1
523	0	4	0	4	0	0		1	0	1	2	3	3	1	0	0	1	20	0	1	1		1	3	3	6	1
524	0	2	0	2	0	1	3	2	1	1	1	3	2	1	0	0	1	20	0	1	1	3	2	3	2	5	1
525	1	3	0	4	0	0	3	3	0	0	2	3	3	1	0	0	0	20	0	1	0	3	3	3	3	6	0
526	1	5	0	2	1	0	3	2	1	1	2	2	2	1	0	0	0	20	0	1	0	3	2	2	2	4	0
527	1	1	0	3	2	0	3	2	0	0	2	3	3	1	0	0	0	20	0	1	0	3	2	3	3	6	0
528	1	2	0	3	2	0	3	3	1	0	2	3	3	1	0	0	0	20	0	1	0	3	3	3	3	6	0
529	1	4	0	3	3	0	2	2	0	0	2	2	1	1	0	0	0	20	0	1	0	2	2	2	1	3	0
530	0	2	0	4	0	0	3	3	0	0	2	3	3	1	0	0	0	20	0	1	0	3	3	3	3	6	0
531	1	1	0	3	0	0	3	3	0	0	2	2	2	1	0	0	0	20	0	1	0	3	3	2	2	4	0
532	0	4	0	1	0	0		2	0	1	2	3	3	1	0	0	1	20	0	1	1		2	3	3	6	1
533	0	3	0	2	0	0	3	3	0	0	2	3	3	1	1	0	0	20	0	1	1	3	3	3	3	6	1
534	0	4	0	3	3	1		1	1	1	2	3	3	1	1	0	0	20	0	1	1		1	3	3	6	1
535	0	1	0	1	1	0	2	2	0	0	2	2	2	1	0	0	0	20	0	1	0	2	2	2	2	4	0
536	0	4	0	1	3	0		1	1	0	2	3	3	1	0	0	0	20	0	1	0		1	3	3	6	0
537	0	3	0	2	0	1		2	0	1	2	3	3	1	1	0	0	20	0	1	1		2	3	3	6	1
538	0	5	0	3	4	1	1	1	0	1	1	1	2	1	0	0	1	20	0	1	1	1	1	1	2	3	1
539	1	3	0	3	2	0	3	3	0	0	2	3	2	1	0	0	0	20	0	1	0	3	3	3	2	5	0
540	0	4	0	2	0	1		1	1	1	1	3	3	1	0	0	1	20	0	1	1		1	3	3	6	1
541	1	1	0	3	2	0	3	2	0	1	2	3	3	1	0	0	0	20	0	1	0	3	2	3	3	6	0
542	0	1	0	2	4	0	2	2	0	0	2	2	2	1	0	0	1	20	0	1	1	2	2	2	2	4	1
543	1	1	0	3	2	0	3	2	0	0	2	3	3	1	0	0	0	20	0	1	0	3	2	3	3	6	0
544	1	4	0	1	0	0	2	1	0	1	2	2	2	1	0	0	0	20	0	1	0	2	1	2	2	4	0
545	0	1	0	2	0	1	2	2	1	1	1	3	3	1	0	0	1	20	0	1	1	2	2	3	3	6	1
546	0	1	0	2	0	1	2	2	1	1	1	3	3	1	0	0	1	20	0	1	1	2	2	3	3	6	1
547	0	4	0	3	3	0		1	0	1	2	3	3	1	0	0	0	20	0	1	0		1	3	3	6	0
548	1	3	0	3	2	0	3	3	0	0	2	3	3	1	0	0	0	20	0	1	0	3	3	3	3	6	0
549	0	1	0	3	1	0	3	3	0	0	2	3	3	1	0	0	0	20	0	1	0	3	3	3	3	6	0
550	0	4	0	4	0	1		1	1	1	1	3	3	1	0	0	1	20	0	1	1		1	3	3	6	1
551	0	1	0	2	0	1	2	2	1	1	1	3	3	1	0	0	1	20	0	1	1	2	2	3	3	6	1
552	0	5	0	2	0	1	3	2	1	0	1	2	2	1	0	0	0	20	0	1	0	3	2	2	2	4	0
553	1	5	0	2	2	1	3	2	0	1	1	3	2	1	1	0	0	20	0	1	1	3	2	3	2	5	1
554	1	2	0	3	1	1	3	1	1	1	1	3	2	1	0	0	1	20	0	1	1	3	1	3	2	5	1
555	0	4	0	2	3	0		1	1	0	1	3	3	1	1	0	0	20	0	1	1		1	3	3	6	1
556	1	1	0	3	2	0	3	2	0	0	2	3	3	1	0	0	0	20	0	1	0	3	2	3	3	6	0
557	1	1	0	4	2	0	3	1	0	0	2	3	2	1	0	0	0	20	0	1	0	3	1	3	2	5	0
558	0	2	0	3	1	0	3	2	0	1	2	2	2	1	0	0	0	20	0	1	0	3	2	2	2	4	0
559	1	4	0	3	0	0	3	2	0	0	2	3	2	1	0	0	0	20	0	1	0	3	2	3	2	5	0
560	1	2	0	3	4	0	3	3	0	0	2	3	3	1	0	0	0	20	0	1	0	3	3	3	3	6	0
561	1	1	0	3	0	0	3	3	0	1	2	3	3	1	0	0	0	20	0	1	0	3	3	3	3	6	0
562	1	4	0	1	1	1	2	1	1	1	2	3	2	1	0	0	0	20	0	1	0	2	1	3	2	5	0
563	1	4	0	3	2	1	3	2	0	1	2	3	2	1	0	0	0	20	0	1	0	3	2	3	2	5	0
564	1	4	0	2	0	0	2	1	0	1	2	2	1	1	0	0	0	20	0	1	0	2	1	2	1	3	0
565	0	3	0	4	3	0	3	3	0	0	2	3	3	1	1	0	0	20	0	1	1	3	3	3	3	6	1
566	0	4	0	2	3	1	2	1	1	1	1	2	2	1	0	1	0	20	0	1	1	2	1	2	2	4	1
567	0	3	0	3	0	1	3	3	0	0	2	3	3	1	0	0	0	20	0	1	0	3	3	3	3	6	0
568	1	2	0	3	0	0	3	2	0	0	2	2	2	1	0	0	0	20	0	1	0	3	2	2	2	4	0
569	0	1	0	2	1	0	2	1	0	0	2	2	3	1	1	0	0	20	0	1	1	2	1	2	3	5	1
570	0	4	0	2	3	1		1	1	1	1	3	3	1	0	0	1	20	0	1	1		1	3	3	6	1
571	0	4	0	1	0	1	2	1	0	1	1	2	2	1	0	0	0	20	0	1	0	2	1	2	2	4	0
572	0	3	0	3	3	1	3	3	1	1	2	3	3	1	1	0	0	20	0	1	1	3	3	3	3	6	1
573	1	2	0	3	0	0	3	3	0	0	2	3	3	1	0	0	0	20	0	1	0	3	3	3	3	6	0
574	1	1	0	4	2	0	3	2	0	0	2	3	2	1	0	0	0	20	0	1	0	3	2	3	2	5	0
575	1	2	0	4	0	0	3	3	0	0	2	3	3	1	0	0	0	20	0	1	0	3	3	3	3	6	0
576	0	4	0	1	0	1	2	1	0	1	1	3	2	1	0	0	0	20	1	1	0	2	1	3	2	5	1
577	1	2	0	3	3	0	3	2	0	0	2	3	3	1	0	0	0	20	0	1	0	3	2	3	3	6	0
578	0	3	0	1	3	0	1	2	1	1	2	1	2	1	1	0	0	20	0	1	1	1	2	1	2	3	1
579	0	1	0	4	0	0	3	2	0	0	2	2	2	1	0	0	0	20	0	1	0	3	2	2	2	4	0
580	1	1	0	2	1	1	2	2	0	1	0	2	2	1	1	0	0	20	0	1	1	2	2	2	2	4	1
581	0	4	0	1	3	0		2	0	1	2	3	3	1	0	0	1	20	0	1	1		2	3	3	6	1
582	1	5	0	3	0	1	3	2	1	1	2	3	3	1	0	0	0	20	0	1	0	3	2	3	3	6	0
583	0	2	0	1	3	0	1	2	1	1	1	2	2	1	0	1	0	20	0	1	1	1	2	2	2	4	1
584	0	4	0	1	0	1		1	0	1	1	3	3	1	0	0	0	20	0	1	0		1	3	3	6	0
585	1	1	0	3	0	0	3	3	0	0	2	3	3	1	0	0	0	20	0	1	0	3	3	3	3	6	0
586	0	4	0	2	3	1	2	1	1	1	1	2	2	1	0	1	0	20	0	1	1	2	1	2	2	4	1
587	0	2	0	4	0	0	2	1	1	1	1	2	2	1	0	0	1	20	0	1	1	2	1	2	2	4	1
588	1	1	0	4	0	0	3	3	0	0	2	3	3	1	0	0	0	20	0	1	0	3	3	3	3	6	0
589	1	1	0	3	2	0	3	2	0	0	2	3	3	1	0	0	0	20	0	1	0	3	2	3	3	6	0
590	0	4	0	2	0	0	2	2	1	1	1	2	2	1	0	0	1	20	0	1	1	2	2	2	2	4	1
591	1	3	0	3	1	0	4	1	0	0	2	4	3	1	0	0	0	20	0	1	0	3	1	3	3	6	0
592	0	5	0	2	0	1	3	2	1	1	1	3	2	1	1	0	0	20	0	1	1	3	2	3	2	5	1
593	0	4	0	2	3	1	2	1	1	1	1	2	2	1	0	1	0	20	0	1	1	2	1	2	2	4	1
594	0	4	0	3	3	1		1	1	1	2	3	3	1	1	0	0	20	0	1	1		1	3	3	6	1
595	1	2	0	3	4	0	3	3	0	0	2	3	3	1	0	0	0	20	0	1	0	3	3	3	3	6	0
596	0	5	0	1	0	1	2	1	0	0	2	2	2	1	0	0	0	20	0	1	0	2	1	2	2	4	0
597	1	1	0	2	1	1	2	2	0	1	0	2	2	1	1	0	0	20	0	1	1	2	2	2	2	4	1
598	0	3	0	3	0	1	3	3	0	1	2	3	3	1	1	0	0	20	0	1	1	3	3	3	3	6	1
599	0	4	0	2	0	0	2	1	1	0	1	2	2	1	0	0	1	20	0	1	1	2	1	2	2	4	1
600	1	3	0	4	0	0	3	3	0	0	2	3	3	1	0	0	0	20	0	1	0	3	3	3	3	6	0
601	1	3	0	2	3	0		2	0	1	2	3	3	1	0	0	0	20	0	1	0		2	3	3	6	0
602	1	3	0	4	0	0	3	3	0	0	2	3	3	1	0	0	0	20	0	1	0	3	3	3	3	6	0
603	1	4	0	2	4	1		2	1	1	1	3	3	1	0	1	0	20	0	1	1		2	3	3	6	1
604	1	1	0	4	1	0	3	2	0	0	2	2	2	1	0	0	0	20	0	1	0	3	2	2	2	4	0
605	1	3	0	1	2	0	1	1	1	0	2	1	1	1	0	0	0	20	0	1	0	1	1	1	1	2	0
606	0	1	0	1	3	0	2	2	1	0	2	2	2	1	0	0	0	20	0	1	0	2	2	2	2	4	0
607	1	5	0	2	1	0	2	1	1	0	2	2	1	1	0	0	0	20	0	1	0	2	1	2	1	3	0
608	0	1	0	3	0	1	2	2	0	1	2	2	3	1	0	0	0	20	1	1	0	2	2	2	3	5	1
609	0	2	0	1	3	0	1	2	1	1	2	2	2	1	1	0	0	20	0	1	1	1	2	2	2	4	1
610	1	5	0	2	3	0	1	2	1	1	1	2	2	1	1	0	0	20	0	1	1	1	2	2	2	4	1
611	0	1	0	3	0	0	3	3	0	1	2	3	3	1	0	0	0	20	0	1	0	3	3	3	3	6	0
612	1	1	0	4	2	0	3	2	0	0	2	3	3	1	0	0	0	20	0	1	0	3	2	3	3	6	0
613	1	1	0	3	2	0	3	2	0	0	2	3	3	1	0	0	0	20	0	1	0	3	2	3	3	6	0
614	0	5	0	2	3	0	4	1	1	0	1	4	3	1	1	0	0	20	0	1	1	3	1	3	3	6	1
615	1	1	0	3	2	0	3	2	0	1	2	3	3	1	0	0	0	20	0	1	0	3	2	3	3	6	0
616	1	2	0	3	2	0	3	3	1	0	2	3	3	1	0	0	0	20	0	1	0	3	3	3	3	6	0
617	1	4	0	3	2	0	3	2	1	1	2	3	3	1	0	0	0	19	0	1	0	3	2	3	3	6	0
618	1	3	0	2	2	0	2	1	1	0	2	2	1	1	1	0	0	20	0	1	1	2	1	2	1	3	1
619	0	1	0	3	1	0	3	2	0	1	2	3	3	1	0	0	0	20	0	1	0	3	2	3	3	6	0
620	0	5	0	3	0	1	3	2	0	1	1	3	3	1	0	0	0	20	0	1	0	3	2	3	3	6	0
621	0	5	0	3	3	0	2	1	1	0	1	1	2	1	1	0	0	20	0	1	1	2	1	1	2	3	1
622	1	4	0	1	2	0	1	1	0	0	2	2	2	1	0	0	0	20	0	1	0	1	1	2	2	4	0
623	1	2	0	4	0	0	3	3	0	0	2	3	3	1	0	0	0	20	0	1	0	3	3	3	3	6	0
624	1	1	0	2	2	1	2	2	0	0	2	2	2	1	1	0	0	20	0	1	1	2	2	2	2	4	1
625	1	3	0	2	3	0		2	0	1	2	3	3	1	0	0	0	20	0	1	0		2	3	3	6	0
626	1	3	0	2	1	1	2	2	0	1	1	2	2	1	0	0	1	20	0	1	1	2	2	2	2	4	1
627	1	3	0	1	4	0	1	2	1	1	1	1	2	1	0	1	0	20	0	1	1	1	2	1	2	3	1
628	0	1	0	4	0	0	3	2	0	0	2	2	2	1	0	0	0	20	0	1	0	3	2	2	2	4	0
629	1	1	0	3	0	0	3	2	1	0	2	3	3	1	0	0	0	20	0	1	0	3	2	3	3	6	0
630	0	4	0	1	3	0		1	1	0	1	3	3	1	1	0	0	20	0	1	1		1	3	3	6	1
631	0	3	0	3	0	1	3	3	1	0	2	3	3	1	0	0	0	20	0	1	0	3	3	3	3	6	0
632	1	1	0	3	2	0	3	2	0	0	2	3	3	1	0	0	0	20	0	1	0	3	2	3	3	6	0
633	0	2	0	2	1	1	3	3	0	1	1	3	2	1	0	0	1	20	0	1	1	3	3	3	2	5	1
634	1	2	0	3	0	0	3	2	0	0	2	2	2	1	0	0	0	20	0	1	0	3	2	2	2	4	0
635	0	5	0	2	1	0	2	1	1	0	2	2	2	1	0	0	0	20	0	1	0	2	1	2	2	4	0
636	1	2	0	4	2	0	3	3	0	0	2	3	3	1	0	0	0	20	0	1	0	3	3	3	3	6	0
637	1	5	0	2	3	0	3	2	0	0	2	2	2	1	0	0	0	20	0	1	0	3	2	2	2	4	0
638	0	4	0	1	0	1	2	1	0	1	1	2	2	1	0	0	0	20	0	1	0	2	1	2	2	4	0
639	0	1	0	1	0	0	2	2	0	1	2	2	2	1	0	0	0	20	0	1	0	2	2	2	2	4	0
640	0	3	0	3	0	1	3	2	1	1	1	3	2	1	0	0	0	20	1	1	0	3	2	3	2	5	1
641	1	3	0	1	4	0	1	2	1	1	1	1	2	1	0	1	0	20	0	1	1	1	2	1	2	3	1
642	1	1	0	4	2	0	3	2	0	0	2	3	2	1	0	0	0	20	0	1	0	3	2	3	2	5	0
643	1	3	0	2	2	0	3	3	1	0	2	3	4	1	1	0	0	20	0	1	1	3	3	3	3	6	1
644	1	2	0	3	2	0	3	2	0	0	2	2	2	1	0	0	0	20	0	1	0	3	2	2	2	4	0
645	1	3	0	3	2	0	3	3	0	0	2	3	3	1	0	0	0	20	0	1	0	3	3	3	3	6	0
646	1	3	0	3	0	0		2	0	1	2	3	3	1	0	0	0	20	0	1	0		2	3	3	6	0
647	0	1	0	2	0	1	2	2	1	1	1	2	2	1	0	0	1	20	0	1	1	2	2	2	2	4	1
648	1	2	0	4	0	0	3	3	0	0	2	3	3	1	0	0	0	20	0	1	0	3	3	3	3	6	0
649	1	4	0	2	2	0	2	1	1	1	1	2	1	1	0	0	1	20	0	1	1	2	1	2	1	3	1
650	0	2	0	1	3	0	2	2	1	0	2	2	2	1	0	0	0	20	0	1	0	2	2	2	2	4	0
651	0	2	0	3	3	1	3	2	1	1	2	3	3	1	1	0	0	20	0	1	1	3	2	3	3	6	1
652	1	2	0	3	0	0	3	2	0	0	2	2	2	1	0	0	0	20	0	1	0	3	2	2	2	4	0
653	1	5	0	3	1	0	3	2	1	1	2	3	3	1	0	0	0	20	0	1	0	3	2	3	3	6	0
654	1	1	0	3	0	0	3	2	0	0	2	2	2	1	0	0	0	20	0	1	0	3	2	2	2	4	0
655	1	1	0	4	0	0	3	2	0	0	2	2	2	1	0	0	0	20	0	1	0	3	2	2	2	4	0
656	1	4	0	2	2	0	1	2	0	0	2	2	2	1	0	0	0	20	0	1	0	1	2	2	2	4	0
657	0	3	0	1	3	0	1	2	1	0	2	1	2	1	1	0	0	20	0	1	1	1	2	1	2	3	1
658	0	4	0	3	3	0		1	0	1	2	3	3	1	0	0	0	20	0	1	0		1	3	3	6	0
659	1	5	0	3	1	0	3	3	1	1	2	3	2	1	0	0	0	20	0	1	0	3	3	3	2	5	0
660	0	3	0	1	3	0	1	2	1	1	2	1	2	1	1	0	0	20	0	1	1	1	2	1	2	3	1
661	1	4	0	3	1	0	3	1	0	0	2	3	2	1	0	0	0	20	0	1	0	3	1	3	2	5	0
662	1	5	0	3	1	0	3	3	1	1	2	3	3	1	0	0	0	20	0	1	0	3	3	3	3	6	0
663	0	3	0	3	4	0	3	3	1	1	1	3	3	1	0	1	0	20	0	1	1	3	3	3	3	6	1
664	1	4	0	1	1	1		2	1	1	1	3	3	1	0	0	1	20	0	1	1		2	3	3	6	1
665	1	1	0	3	1	0	3	2	0	1	2	3	3	1	0	0	0	20	0	1	0	3	2	3	3	6	0
666	1	3	0	3	0	0		2	0	1	2	3	3	1	0	0	0	20	0	1	0		2	3	3	6	0
667	0	1	0	2	0	0	2	2	0	1	2	3	3	1	1	0	0	20	0	1	1	2	2	3	3	6	1
668	0	2	0	3	0	1	3	3	1	1	1	3	3	1	0	0	1	20	0	1	1	3	3	3	3	6	1
669	0	4	0	2	3	1		1	1	1	1	3	3	1	0	0	1	20	0	1	1		1	3	3	6	1
670	0	2	0	3	3	0	3	2	1	0	2	3	3	1	1	0	0	20	0	1	1	3	2	3	3	6	1
671	1	1	0	2	2	1	2	2	0	0	2	2	2	1	1	0	0	20	0	1	1	2	2	2	2	4	1
672	1	1	0	3	0	0	3	2	0	0	2	2	2	1	0	0	0	20	0	1	0	3	2	2	2	4	0
673	0	3	0	2	1	1	2	1	0	1	1	2	1	1	0	0	1	20	0	1	1	2	1	2	1	3	1
674	1	2	0	3	0	0	3	2	0	0	2	2	2	1	0	0	0	20	0	1	0	3	2	2	2	4	0
675	0	3	0	1	4	1	1	2	0	1	1	1	2	1	0	0	1	20	0	1	1	1	2	1	2	3	1
676	1	3	0	4	0	0	3	3	0	0	2	3	3	1	0	0	0	20	0	1	0	3	3	3	3	6	0
677	1	3	0	2	0	0	1	2	0	0	2	1	2	1	0	0	0	20	0	1	0	1	2	1	2	3	0
678	0	5	0	1	0	1	2	1	0	0	2	2	2	1	0	0	0	20	0	1	0	2	1	2	2	4	0
679	0	4	0	3	0	0	3	2	0	0	2	3	2	1	0	0	0	20	0	1	0	3	2	3	2	5	0
680	1	2	0	3	2	0	3	2	0	0	2	2	2	1	0	0	0	20	0	1	0	3	2	2	2	4	0
681	0	5	0	2	1	0	3	2	1	0	2	3	3	1	0	0	0	20	0	1	0	3	2	3	3	6	0
682	1	3	0	4	0	0	3	3	0	0	2	3	3	1	0	0	0	20	0	1	0	3	3	3	3	6	0
683	0	3	0	3	3	1	3	3	1	1	2	3	3	1	1	0	0	20	0	1	1	3	3	3	3	6	1
684	0	1	0	4	4	0	4	4	0	0	2	3	3	1	1	0	0	20	0	1	1	3	3	3	3	6	1
685	1	3	0	3	0	0	3	3	0	1	2	3	2	1	0	0	0	20	0	1	0	3	3	3	2	5	0
686	0	4	0	3	1	0	3	1	0	0	2	3	2	1	1	0	0	20	0	1	1	3	1	3	2	5	1
687	1	4	0	1	1	1		2	1	1	1	3	3	1	0	0	1	20	0	1	1		2	3	3	6	1
688	0	4	0	2	3	1		1	1	1	1	3	3	1	0	0	1	20	0	1	1		1	3	3	6	1
689	1	1	0	3	2	0	3	2	0	0	2	3	3	1	0	0	0	20	0	1	0	3	2	3	3	6	0
690	1	1	0	3	0	0	3	2	0	0	2	3	3	1	0	0	0	20	0	1	0	3	2	3	3	6	0
691	1	1	0	4	2	0	3	2	0	0	2	3	2	1	0	0	0	20	0	1	0	3	2	3	2	5	0
692	0	3	0	1	0	0	3	2	1	0	2	3	2	1	1	0	0	20	0	1	1	3	2	3	2	5	1
693	1	4	0	2	4	0		2	1	0	1	3	3	1	0	1	0	20	0	1	1		2	3	3	6	1
694	0	3	0	1	3	0	1	2	1	1	1	1	2	1	1	0	0	20	0	1	1	1	2	1	2	3	1
695	1	1	0	3	0	0	3	3	0	0	2	3	3	1	0	0	0	20	0	1	0	3	3	3	3	6	0
696	0	1	0	3	0	0	3	2	0	1	2	3	3	1	0	0	0	20	0	1	0	3	2	3	3	6	0
697	0	4	0	3	3	0		1	0	1	2	3	3	1	0	0	0	20	0	1	0		1	3	3	6	0
698	0	1	0	4	0	0	3	2	0	0	2	2	2	1	0	0	0	20	0	1	0	3	2	2	2	4	0
699	0	1	0	2	0	1	2	2	1	1	1	3	3	1	0	0	1	20	0	1	1	2	2	3	3	6	1
700	1	1	0	4	0	0	3	2	0	0	2	2	2	1	0	0	0	20	0	1	0	3	2	2	2	4	0
701	0	2	0	3	3	1	2	2	1	1	2	3	3	1	1	0	0	20	0	1	1	2	2	3	3	6	1
702	0	2	0	2	3	0	3	2	1	1	1	2	2	1	0	1	0	20	0	1	1	3	2	2	2	4	1
703	1	5	0	2	4	0	3	3	0	0	2	3	2	1	0	0	0	20	0	1	0	3	3	3	2	5	0
704	1	2	0	3	0	0	3	2	0	0	2	2	2	1	0	0	0	20	0	1	0	3	2	2	2	4	0
705	0	1	0	3	0	0	4	2	1	1	2	4	2	1	1	0	0	20	0	1	1	3	2	3	2	5	1
706	1	3	0	2	2	0		2	0	0	2	3	3	1	0	0	0	20	0	1	0		2	3	3	6	0
707	0	1	0	3	0	0	3	2	0	1	2	3	3	1	0	0	0	20	0	1	0	3	2	3	3	6	0
708	0	3	0	3	4	0	3	2	1	0	2	3	3	1	0	1	0	20	0	1	1	3	2	3	3	6	1
709	1	2	0	3	0	0	3	3	0	0	2	3	3	1	0	0	0	20	0	1	0	3	3	3	3	6	0
710	1	3	0	2	2	0		2	0	0	2	3	3	1	0	0	0	20	0	1	0		2	3	3	6	0
711	0	2	0	2	1	1	3	2	1	1	1	2	2	1	0	0	1	20	0	1	1	3	2	2	2	4	1
712	1	2	0	1	0	1	2	2	0	1	2	2	2	1	1	0	0	20	0	1	1	2	2	2	2	4	1
713	0	4	0	2	3	0		1	1	0	1	3	3	1	1	0	0	20	0	1	1		1	3	3	6	1
714	0	4	0	2	0	1		1	1	1	1	3	3	1	0	0	1	20	0	1	1		1	3	3	6	1
715	1	1	0	3	0	0	3	2	0	0	2	3	3	1	0	0	0	20	0	1	0	3	2	3	3	6	0
716	1	1	0	3	2	0	3	2	1	1	2	3	3	1	0	0	0	20	0	1	0	3	2	3	3	6	0
717	1	1	0	4	2	0	3	2	0	0	2	3	3	1	0	0	0	20	0	1	0	3	2	3	3	6	0
718	1	5	0	2	1	0	3	2	1	0	2	2	2	1	0	0	0	20	0	1	0	3	2	2	2	4	0
719	0	3	0	3	0	1	3	2	1	1	1	3	2	1	0	0	0	20	1	1	0	3	2	3	2	5	1
720	1	3	0	4	0	0	3	3	0	0	2	3	3	1	0	0	0	20	0	1	0	3	3	3	3	6	0
721	0	3	0	3	1	0	3	3	0	0	2	3	3	1	0	0	0	20	0	1	0	3	3	3	3	6	0
722	1	3	0	4	0	0	3	3	0	0	2	3	3	1	0	0	0	20	0	1	0	3	3	3	3	6	0
723	0	3	0	3	3	0	3	3	1	1	2	3	3	1	1	0	0	20	0	1	1	3	3	3	3	6	1
724	0	1	0	1	1	1	2	2	0	1	0	2	2	1	1	0	0	20	0	1	1	2	2	2	2	4	1
725	1	4	0	1	0	1	2	1	0	0	2	3	2	1	0	0	0	20	0	1	0	2	1	3	2	5	0
726	1	2	0	4	0	0	3	3	0	0	2	3	3	1	0	0	0	20	0	1	0	3	3	3	3	6	0
727	1	1	0	3	0	1	3	2	0	1	2	3	3	1	0	0	0	20	0	1	0	3	2	3	3	6	0
728	1	1	0	4	0	0	3	2	0	0	2	2	2	1	0	0	0	20	0	1	0	3	2	2	2	4	0
729	0	3	0	3	2	0	3	3	0	0	2	3	3	1	0	0	0	20	0	1	0	3	3	3	3	6	0
730	1	1	0	4	0	0	3	2	0	0	2	2	2	1	0	0	0	20	0	1	0	3	2	2	2	4	0
731	1	3	0	2	0	0	2	1	0	0	2	2	2	1	0	0	0	20	0	1	0	2	1	2	2	4	0
732	0	4	0	1	0	1		2	1	1	1	3	3	1	0	0	1	20	0	1	1		2	3	3	6	1
733	1	1	0	2	2	1	2	2	0	0	2	3	3	1	1	0	0	20	0	1	1	2	2	3	3	6	1
734	0	3	0	3	0	1	3	3	0	0	2	3	3	1	0	0	0	20	0	1	0	3	3	3	3	6	0
735	1	4	0	1	1	1		2	1	1	1	3	3	1	0	0	1	20	0	1	1		2	3	3	6	1
736	1	3	0	2	2	0		2	1	1	2	3	3	1	0	0	1	20	0	1	1		2	3	3	6	1
737	1	5	0	2	4	0	3	2	0	0	2	2	2	1	0	0	0	20	0	1	0	3	2	2	2	4	0
738	1	1	0	4	2	0	3	2	0	0	2	3	3	1	0	0	0	20	0	1	0	3	2	3	3	6	0
739	0	2	0	3	3	1	2	2	1	1	2	3	3	1	1	0	0	20	0	1	1	2	2	3	3	6	1
740	1	5	0	3	1	0	3	3	1	1	2	3	3	1	0	0	0	20	0	1	0	3	3	3	3	6	0
741	1	1	0	4	1	0	3	2	0	0	2	2	2	1	0	0	0	20	0	1	0	3	2	2	2	4	0
742	0	2	0	2	3	1	3	2	1	1	1	3	3	1	0	0	1	20	0	1	1	3	2	3	3	6	1
743	1	1	0	4	2	0	3	2	0	0	2	3	2	1	0	0	0	20	0	1	0	3	2	3	2	5	0
744	1	1	0	3	0	0	3	3	0	1	2	3	3	1	0	0	0	20	0	1	0	3	3	3	3	6	0
745	1	3	0	2	2	0	3	1	1	1	2	3	2	1	0	0	1	20	0	1	1	3	1	3	2	5	1
746	0	1	0	3	0	0	3	3	0	1	2	3	3	1	0	0	0	20	0	1	0	3	3	3	3	6	0
747	0	3	0	2	4	1		2	1	1	0	3	3	1	0	1	0	20	0	1	1		2	3	3	6	1
748	1	4	0	3	2	1	3	2	0	1	2	3	2	1	0	0	0	20	0	1	0	3	2	3	2	5	0
749	1	2	0	3	0	0	3	2	0	0	2	2	2	1	0	0	0	20	0	1	0	3	2	2	2	4	0
750	1	5	0	3	0	1	3	2	1	1	2	3	3	1	0	0	0	20	0	1	0	3	2	3	3	6	0
751	0	1	0	2	4	0	2	2	0	0	2	2	2	1	0	0	1	20	0	1	1	2	2	2	2	4	1
752	1	1	0	4	2	0	3	1	0	0	2	3	2	1	0	0	0	20	0	1	0	3	1	3	2	5	0
753	0	2	0	2	1	1	3	3	0	1	1	3	2	1	0	0	1	20	0	1	1	3	3	3	2	5	1
754	0	1	0	1	0	0	2	2	0	1	2	2	2	1	0	0	0	20	0	1	0	2	2	2	2	4	0
755	0	4	0	2	3	0	3	1	1	1	1	3	2	1	0	0	1	20	0	1	1	3	1	3	2	5	1
756	0	2	0	3	1	1	3	1	1	1	1	3	2	1	0	0	1	20	0	1	1	3	1	3	2	5	1
757	1	5	0	2	1	0	2	1	1	0	2	2	2	1	0	0	0	20	0	1	0	2	1	2	2	4	0
758	0	2	0	4	0	0	3	3	0	0	2	3	3	1	0	0	0	20	0	1	0	3	3	3	3	6	0
759	0	2	0	3	0	1	3	3	1	1	1	3	3	1	0	0	1	20	0	1	1	3	3	3	3	6	1
760	1	1	0	3	0	0	3	2	0	1	2	3	3	1	0	0	0	20	0	1	0	3	2	3	3	6	0
761	1	2	0	3	0	0	3	2	0	0	2	3	3	1	0	0	0	20	0	1	0	3	2	3	3	6	0
762	0	3	0	1	1	1	1	2	1	1	1	1	2	1	0	0	1	20	0	1	1	1	2	1	2	3	1
763	1	3	0	2	2	0		2	1	1	2	3	3	1	0	0	1	20	0	1	1		2	3	3	6	1
764	0	4	0	3	3	1		1	1	1	2	3	3	1	1	0	0	20	0	1	1		1	3	3	6	1
765	1	4	0	3	2	1	3	2	0	1	2	3	2	1	0	0	0	20	0	1	0	3	2	3	2	5	0
766	1	5	0	2	4	0	3	2	0	0	2	3	3	1	0	0	0	20	0	1	0	3	2	3	3	6	0
767	1	3	0	2	1	1	2	2	0	1	1	2	1	1	0	0	1	20	0	1	1	2	2	2	1	3	1
768	1	1	0	3	0	0	3	2	0	1	2	3	3	1	0	0	0	20	0	1	0	3	2	3	3	6	0
769	1	3	0	4	0	0	3	3	0	0	2	3	3	1	0	0	0	20	0	1	0	3	3	3	3	6	0
770	0	3	0	2	3	1	3	3	1	1	1	3	3	1	0	0	1	20	0	1	1	3	3	3	3	6	1
771	0	2	0	3	0	1	3	2	1	1	1	2	2	1	0	0	1	20	0	1	1	3	2	2	2	4	1
772	0	2	0	3	1	1	3	2	0	1	2	2	2	1	0	0	0	20	0	1	0	3	2	2	2	4	0
773	1	5	0	2	3	0	1	2	1	1	1	2	2	1	1	0	0	20	0	1	1	1	2	2	2	4	1
774	0	4	0	2	0	0	3	2	0	0	2	3	2	1	0	0	0	20	0	1	0	3	2	3	2	5	0
775	0	5	0	2	0	1	2	1	1	0	1	1	2	1	0	0	0	20	0	1	0	2	1	1	2	3	0
776	1	5	0	2	4	0	3	2	0	0	2	2	2	1	0	0	0	20	0	1	0	3	2	2	2	4	0
777	1	4	0	2	0	0	2	1	0	1	2	2	2	1	0	0	0	20	0	1	0	2	1	2	2	4	0
778	1	2	0	3	0	0	3	2	0	1	2	2	2	1	0	0	0	20	0	1	0	3	2	2	2	4	0
779	1	4	0	1	2	0	1	1	0	0	2	2	2	1	0	0	0	20	0	1	0	1	1	2	2	4	0
780	0	5	0	3	4	0	3	3	0	1	2	3	3	1	0	0	0	20	0	1	0	3	3	3	3	6	0
781	1	1	0	4	0	0	3	3	0	0	2	3	3	1	0	0	0	20	0	1	0	3	3	3	3	6	0
782	1	3	0	2	3	0	2	2	0	0	2	2	2	1	0	0	0	20	0	1	0	2	2	2	2	4	0
783	1	3	0	3	2	0	3	3	0	0	2	3	3	1	0	0	0	20	0	1	0	3	3	3	3	6	0
784	1	1	0	1	1	1	2	2	0	1	1	2	2	1	0	0	1	20	0	1	1	2	2	2	2	4	1
785	0	3	0	1	3	0	1	2	1	1	2	1	2	1	1	0	0	20	0	1	1	1	2	1	2	3	1
786	0	5	0	1	3	1	2	2	0	1	1	2	2	1	0	0	1	20	0	1	1	2	2	2	2	4	1
787	1	1	0	3	0	0	3	3	1	1	2	4	3	1	1	0	0	20	0	1	1	3	3	3	3	6	1
788	1	3	0	4	0	0	3	3	0	0	2	3	3	1	0	0	0	20	0	1	0	3	3	3	3	6	0
789	1	4	0	2	0	0	2	1	0	1	2	2	2	1	0	0	0	20	0	1	0	2	1	2	2	4	0
790	1	3	0	1	0	0	2	1	0	0	2	2	2	1	0	0	0	20	0	1	0	2	1	2	2	4	0
791	0	3	0	1	0	1	1	2	1	1	1	1	2	1	0	0	1	20	0	1	1	1	2	1	2	3	1
792	1	3	0	1	1	1	1	2	1	1	1	1	2	1	0	0	1	20	0	1	1	1	2	1	2	3	1
793	1	2	0	3	0	0	3	2	0	1	2	2	2	1	0	0	0	20	0	1	0	3	2	2	2	4	0
794	0	4	0	3	1	0	3	1	0	0	2	3	2	1	0	0	0	20	0	1	0	3	1	3	2	5	0
795	0	3	0	3	0	1	3	3	0	0	2	3	3	1	0	0	0	20	0	1	0	3	3	3	3	6	0
796	0	3	0	3	1	0	3	3	0	0	2	3	3	1	0	0	0	20	0	1	0	3	3	3	3	6	0
797	1	2	0	3	2	0	3	3	1	1	2	3	4	1	1	0	0	20	0	1	1	3	3	3	3	6	1
798	1	4	0	3	2	0	3	2	0	1	2	3	3	1	0	0	0	20	0	1	0	3	2	3	3	6	0
799	1	3	0	3	0	0	3	2	0	0	2	3	2	1	0	0	0	20	0	1	0	3	2	3	2	5	0
800	1	1	0	3	2	0	3	1	1	0	2	3	3	1	0	0	0	20	0	1	0	3	1	3	3	6	0
801	0	1	0	4	1	0	3	3	0	0	2	3	3	1	0	0	0	20	0	1	0	3	3	3	3	6	0
802	1	4	0	3	1	0	3	1	0	0	2	3	2	1	0	0	0	20	0	1	0	3	1	3	2	5	0
803	1	1	0	2	2	1	2	2	0	0	2	2	2	1	1	0	0	20	0	1	1	2	2	2	2	4	1
804	0	2	0	2	4	0	3	2	0	1	2	3	2	1	0	0	1	20	0	1	1	3	2	3	2	5	1
805	0	5	0	2	0	1	3	2	0	1	1	2	2	1	0	0	0	20	0	1	0	3	2	2	2	4	0
806	1	3	0	2	1	1	3	3	0	1	2	3	3	1	1	0	0	20	0	1	1	3	3	3	3	6	1
807	1	4	0	3	1	0	3	1	0	0	2	3	2	1	0	0	0	20	0	1	0	3	1	3	2	5	0
808	0	3	0	1	3	0	1	2	1	0	2	1	2	1	0	0	0	20	0	1	0	1	2	1	2	3	0
809	1	5	0	2	1	0	2	1	1	0	2	2	1	1	0	0	0	20	0	1	0	2	1	2	1	3	0
810	1	1	0	3	2	0	3	1	1	0	2	3	3	1	0	0	0	20	0	1	0	3	1	3	3	6	0
811	1	1	0	2	2	0	2	2	0	0	2	2	2	1	0	0	0	20	0	1	0	2	2	2	2	4	0
812	1	1	0	2	2	1	2	2	0	0	2	2	2	1	1	0	0	20	0	1	1	2	2	2	2	4	1
813	0	2	0	4	0	0	3	3	0	0	2	3	3	1	0	0	0	20	0	1	0	3	3	3	3	6	0
814	1	4	0	2	3	0	1	2	0	0	2	2	2	1	0	0	0	20	0	1	0	1	2	2	2	4	0
815	1	4	0	3	1	0	3	1	0	0	2	3	2	1	0	0	0	20	0	1	0	3	1	3	2	5	0
816	0	3	0	2	0	0	3	1	1	0	2	3	2	1	0	0	1	20	0	1	1	3	1	3	2	5	1
817	1	4	0	1	1	0	2	1	0	1	2	2	2	1	0	0	0	20	0	1	0	2	1	2	2	4	0
818	0	3	0	3	0	1	3	3	0	1	2	3	3	1	1	0	0	20	0	1	1	3	3	3	3	6	1
819	0	1	0	4	0	0	3	2	0	0	2	2	2	1	0	0	0	20	0	1	0	3	2	2	2	4	0
820	1	4	0	2	2	0	3	2	0	0	2	3	2	1	0	0	0	20	0	1	0	3	2	3	2	5	0
821	0	1	0	2	3	0	3	1	0	1	2	3	3	1	1	0	0	20	0	1	1	3	1	3	3	6	1
822	1	1	0	3	1	0	3	2	0	1	2	3	3	1	0	0	0	20	0	1	0	3	2	3	3	6	0
823	1	1	0	3	2	0	3	2	0	0	2	3	3	1	0	0	0	20	0	1	0	3	2	3	3	6	0
824	1	1	0	3	2	0	3	2	0	0	2	3	3	1	0	0	0	20	0	1	0	3	2	3	3	6	0
825	1	5	0	2	4	0	3	2	0	0	2	3	3	1	0	0	0	20	0	1	0	3	2	3	3	6	0
826	1	3	0	3	2	0	3	3	0	0	2	3	3	1	0	0	0	20	0	1	0	3	3	3	3	6	0
827	1	1	0	4	1	0	3	2	0	0	2	2	2	1	0	0	0	20	0	1	0	3	2	2	2	4	0
828	1	1	0	3	0	0	3	2	1	0	2	3	3	1	0	0	0	20	0	1	0	3	2	3	3	6	0
829	0	2	0	3	3	0	3	2	0	1	2	3	3	1	0	0	0	20	0	1	0	3	2	3	3	6	0
830	1	1	0	2	2	0	2	2	0	0	2	2	2	1	0	0	0	20	0	1	0	2	2	2	2	4	0
831	0	1	0	4	1	0	4	4	0	0	2	3	3	1	1	0	0	20	0	1	1	3	3	3	3	6	1
832	0	2	0	3	3	1	3	2	1	1	2	3	3	1	1	0	0	20	0	1	1	3	2	3	3	6	1
833	0	2	0	2	0	1	3	2	1	1	1	3	2	1	0	0	1	20	0	1	1	3	2	3	2	5	1
834	1	2	0	4	0	1	3	2	0	0	2	3	2	1	0	0	0	20	0	1	0	3	2	3	2	5	0
835	1	4	0	2	1	1		1	1	1	1	3	3	1	0	0	1	20	0	1	1		1	3	3	6	1
836	1	5	0	2	4	0	3	3	0	0	2	3	2	1	0	0	0	20	0	1	0	3	3	3	2	5	0
837	1	4	0	3	1	0	3	1	0	0	2	3	2	1	0	0	0	20	0	1	0	3	1	3	2	5	0
838	0	4	0	2	3	1		1	1	1	1	3	3	1	0	0	1	20	0	1	1		1	3	3	6	1
839	1	3	0	2	2	0		2	1	1	2	3	3	1	0	0	1	20	0	1	1		2	3	3	6	1
840	0	4	0	1	3	0		1	1	1	2	3	3	1	1	0	0	20	0	1	1		1	3	3	6	1
841	0	3	0	3	4	1	1	1	0	1	1	2	1	1	0	0	1	20	0	1	1	1	1	2	1	3	1
842	1	1	0	4	1	0	3	3	0	0	2	3	3	1	0	0	0	20	0	1	0	3	3	3	3	6	0
843	1	1	0	3	0	0	3	2	0	0	2	2	2	1	0	0	0	20	0	1	0	3	2	2	2	4	0
844	1	1	0	3	2	0	3	2	1	1	2	3	3	1	0	0	0	20	0	1	0	3	2	3	3	6	0
845	0	1	0	3	1	1	3	3	0	1	0	3	3	1	1	0	0	20	0	1	1	3	3	3	3	6	1
846	1	4	0	3	1	0		2	0	1	2	3	3	1	0	0	0	20	0	1	0		2	3	3	6	0
847	0	4	0	1	0	0		2	0	1	2	3	3	1	0	0	1	20	0	1	1		2	3	3	6	1
848	0	2	0	4	4	0	3	1	1	1	2	4	1	1	1	0	0	20	0	1	1	3	1	3	1	4	1
849	1	2	0	2	2	0	3	2	0	0	2	2	2	1	1	0	0	20	0	1	1	3	2	2	2	4	1
850	1	1	0	1	0	0	3	3	0	1	2	3	3	1	1	0	0	20	0	1	1	3	3	3	3	6	1
851	0	3	0	1	3	0	1	2	1	0	1	1	2	1	1	0	0	20	0	1	1	1	2	1	2	3	1
852	1	1	0	4	1	0	3	2	0	0	2	2	2	1	0	0	0	20	0	1	0	3	2	2	2	4	0
853	1	3	0	1	3	1	1	1	0	1	2	1	1	1	0	0	0	20	0	1	0	1	1	1	1	2	0
854	1	3	0	1	0	0	2	1	0	0	2	2	2	1	0	0	0	20	0	1	0	2	1	2	2	4	0
855	0	1	0	2	1	0	2	2	0	0	2	2	2	1	0	0	0	20	0	1	0	2	2	2	2	4	0
856	1	1	0	2	2	0	2	2	0	0	2	2	2	1	0	0	0	20	0	1	0	2	2	2	2	4	0
857	0	5	0	2	0	1	3	2	1	1	1	3	2	1	1	0	0	20	0	1	1	3	2	3	2	5	1
858	1	3	0	3	2	0	3	3	0	0	2	3	3	1	0	0	0	20	0	1	0	3	3	3	3	6	0
859	0	2	0	2	3	0	3	2	1	0	1	2	2	1	0	1	0	20	0	1	1	3	2	2	2	4	1
860	0	3	0	2	3	1	3	3	1	1	1	3	3	1	0	0	1	20	0	1	1	3	3	3	3	6	1
861	1	4	0	3	0	1		1	1	1	1	3	3	1	0	0	0	20	1	1	0		1	3	3	6	1
862	0	1	0	3	1	1	3	3	0	1	0	3	3	1	1	0	0	20	0	1	1	3	3	3	3	6	1
863	0	5	0	1	0	1	2	1	0	0	2	2	2	1	0	0	0	20	0	1	0	2	1	2	2	4	0
864	1	4	0	2	2	0	2	1	0	1	2	2	1	1	0	0	1	20	0	1	1	2	1	2	1	3	1
865	1	5	0	2	1	0	3	2	1	1	2	2	2	1	0	0	0	20	0	1	0	3	2	2	2	4	0
866	0	5	0	1	3	1	2	2	0	1	1	2	2	1	0	0	1	20	0	1	1	2	2	2	2	4	1
867	1	4	0	3	2	0	3	2	0	1	2	3	3	1	0	0	0	20	0	1	0	3	2	3	3	6	0
868	1	2	0	3	2	0	3	2	0	0	2	2	2	1	0	0	0	20	0	1	0	3	2	2	2	4	0
869	0	4	0	3	3	1		1	1	1	2	3	3	1	1	0	0	20	0	1	1		1	3	3	6	1
870	0	3	0	3	4	1	2	1	1	1	0	2	1	1	0	1	0	20	0	1	1	2	1	2	1	3	1
871	0	3	0	3	0	1	3	3	0	0	2	3	3	1	1	0	0	20	0	1	1	3	3	3	3	6	1
872	0	5	0	1	0	1	2	1	0	1	2	2	2	1	0	0	0	20	0	1	0	2	1	2	2	4	0
873	0	5	0	2	3	0	2	2	1	1	1	2	2	1	1	0	0	20	0	1	1	2	2	2	2	4	1
874	0	4	0	1	0	1	2	1	0	1	1	3	3	1	0	0	0	20	0	1	0	2	1	3	3	6	0
875	1	5	0	3	1	0	3	3	1	1	2	3	3	1	0	0	0	20	0	1	0	3	3	3	3	6	0
876	1	1	0	3	2	0	3	2	1	1	2	3	3	1	0	0	0	20	0	1	0	3	2	3	3	6	0
877	0	1	0	2	0	1	2	2	1	1	1	3	3	1	0	0	1	20	0	1	1	2	2	3	3	6	1
878	0	3	0	1	3	0	1	2	1	1	2	1	2	1	1	0	0	20	0	1	1	1	2	1	2	3	1
879	1	2	0	3	0	0	3	2	0	0	2	2	2	1	0	0	0	20	0	1	0	3	2	2	2	4	0
880	0	1	0	3	3	0	3	3	1	0	2	3	3	1	1	0	0	20	0	1	1	3	3	3	3	6	1
881	1	2	0	3	0	0	3	2	0	0	2	3	3	1	0	0	0	20	0	1	0	3	2	3	3	6	0
882	0	5	0	2	0	1	3	2	1	1	1	3	2	1	1	0	0	20	0	1	1	3	2	3	2	5	1
883	0	4	0	2	0	1		1	1	1	1	3	3	1	0	0	1	20	0	1	1		1	3	3	6	1
884	1	1	0	1	1	1	2	2	0	1	1	2	2	1	0	0	1	20	0	1	1	2	2	2	2	4	1
885	1	1	0	1	3	0	2	2	1	1	1	2	2	1	1	0	0	20	0	1	1	2	2	2	2	4	1
886	1	2	0	4	1	1	1	2	0	1	2	1	2	1	1	0	0	20	0	1	1	1	2	1	2	3	1
887	1	3	0	2	2	0		2	1	1	2	3	3	1	0	0	1	20	0	1	1		2	3	3	6	1
888	0	4	0	2	3	1	2	1	1	1	1	2	2	1	0	1	0	20	0	1	1	2	1	2	2	4	1
889	1	2	0	2	0	1	3	2	0	0	2	2	2	1	1	0	0	20	0	1	1	3	2	2	2	4	1
890	1	1	0	2	2	0	2	2	0	0	2	2	2	1	0	0	0	20	0	1	0	2	2	2	2	4	0
891	0	1	0	2	1	1	2	2	0	1	0	2	2	1	1	0	0	20	0	1	1	2	2	2	2	4	1
892	1	2	0	3	3	0	3	2	0	0	2	3	3	1	0	0	0	20	0	1	0	3	2	3	3	6	0
893	1	3	0	2	3	0	2	2	0	0	2	2	2	1	0	0	0	20	0	1	0	2	2	2	2	4	0
894	0	1	0	4	1	0	3	3	0	0	2	3	3	1	0	0	0	20	0	1	0	3	3	3	3	6	0
895	0	3	0	3	4	0	3	3	0	0	2	3	2	1	0	0	0	20	0	1	0	3	3	3	2	5	0
896	0	4	0	2	0	0	2	2	1	1	1	2	2	1	0	0	1	20	0	1	1	2	2	2	2	4	1
897	1	5	0	3	0	1	3	2	1	1	2	3	3	1	0	0	0	20	0	1	0	3	2	3	3	6	0
898	1	1	0	2	2	0	2	2	0	0	2	2	2	1	0	0	0	20	0	1	0	2	2	2	2	4	0
899	1	2	0	3	0	0	3	3	0	0	2	3	3	1	0	0	0	20	0	1	0	3	3	3	3	6	0
900	0	1	0	1	3	0	2	2	1	0	2	2	2	1	1	0	0	20	0	1	1	2	2	2	2	4	1
901	1	3	0	2	2	0		2	1	1	2	3	3	1	0	0	1	20	0	1	1		2	3	3	6	1
902	0	4	0	1	0	0	2	2	1	1	2	2	2	1	1	0	0	20	0	1	1	2	2	2	2	4	1
903	1	2	0	3	0	0	3	2	0	0	2	3	3	1	0	0	0	20	0	1	0	3	2	3	3	6	0
904	1	5	0	2	1	0	2	1	1	0	2	2	2	1	0	0	0	20	0	1	0	2	1	2	2	4	0
905	0	4	0	1	3	0		1	1	1	2	3	3	1	0	0	0	20	0	1	0		1	3	3	6	0
906	1	1	0	4	2	0	3	1	0	0	2	3	2	1	0	0	0	20	0	1	0	3	1	3	2	5	0
907	1	1	0	4	2	0	3	2	0	0	2	3	3	1	0	0	0	20	0	1	0	3	2	3	3	6	0
908	0	5	0	2	0	1	3	2	1	1	1	2	2	1	1	0	0	20	0	1	1	3	2	2	2	4	1
909	1	2	0	4	0	0	3	3	0	0	2	3	3	1	0	0	0	20	0	1	0	3	3	3	3	6	0
910	1	1	0	2	2	0	2	2	0	0	2	2	2	1	0	0	0	20	0	1	0	2	2	2	2	4	0
911	0	3	0	1	0	1	1	2	0	0	1	1	2	1	0	0	0	20	0	1	0	1	2	1	2	3	0
912	0	2	0	3	1	0	3	2	0	1	2	2	2	1	0	0	0	20	0	1	0	3	2	2	2	4	0
913	0	4	0	3	3	1		1	1	1	2	3	3	1	1	0	0	20	0	1	1		1	3	3	6	1
914	1	3	0	3	0	1	3	2	0	0	2	3	2	1	0	0	0	20	0	1	0	3	2	3	2	5	0
915	0	2	0	3	1	1	3	3	1	1	2	2	2	1	0	0	0	20	0	1	0	3	3	2	2	4	0
916	1	5	0	2	1	0	3	2	1	0	2	2	2	1	0	0	0	20	0	1	0	3	2	2	2	4	0
917	0	4	0	4	0	0	2	1	0	1	2	2	2	1	0	0	1	20	0	1	1	2	1	2	2	4	1
918	0	4	0	1	0	0	2	1	0	0	2	2	1	1	0	0	0	20	0	1	0	2	1	2	1	3	0
919	0	5	0	1	0	1	2	1	0	1	2	2	2	1	0	0	0	20	0	1	0	2	1	2	2	4	0
920	1	1	0	4	2	0	3	1	0	0	2	3	2	1	0	0	0	20	0	1	0	3	1	3	2	5	0
921	1	1	0	2	4	1	2	2	1	1	1	2	1	1	0	1	0	20	0	1	1	2	2	2	1	3	1
922	1	5	0	2	1	0	2	1	1	0	2	2	2	1	0	0	0	20	0	1	0	2	1	2	2	4	0
923	1	1	0	3	1	1	3	2	1	1	1	3	3	1	0	0	1	20	0	1	1	3	2	3	3	6	1
924	1	1	0	2	2	0	2	2	0	0	2	2	2	1	0	0	0	20	0	1	0	2	2	2	2	4	0
925	0	1	0	3	3	0	3	3	1	0	2	3	3	1	1	0	0	20	0	1	1	3	3	3	3	6	1
926	0	1	0	1	0	1	1	1	0	1	0	2	2	1	1	0	0	20	0	1	1	1	1	2	2	4	1
927	1	2	0	3	3	0	3	2	0	1	2	2	2	1	0	0	0	20	0	1	0	3	2	2	2	4	0
928	1	4	0	2	4	0	2	2	0	0	2	2	1	1	0	0	0	20	0	1	0	2	2	2	1	3	0
929	0	1	0	2	3	1	2	2	1	1	2	3	3	1	1	0	0	20	0	1	1	2	2	3	3	6	1
930	1	4	0	2	4	0	2	2	0	0	2	2	1	1	0	0	0	20	0	1	0	2	2	2	1	3	0
931	1	4	0	1	0	1	2	1	0	0	2	3	2	1	0	0	0	20	0	1	0	2	1	3	2	5	0
932	1	1	0	4	0	0	3	3	0	0	2	3	3	1	0	0	0	20	0	1	0	3	3	3	3	6	0
933	0	2	0	3	0	1	2	3	0	0	2	3	3	1	1	0	0	20	0	1	1	2	3	3	3	6	1
934	0	4	0	3	3	1		1	1	1	2	3	3	1	1	0	0	20	0	1	1		1	3	3	6	1
935	0	1	0	1	0	0	3	2	1	1	2	3	3	1	0	0	1	20	0	1	1	3	2	3	3	6	1
936	0	1	0	1	0	1	2	1	0	0	0	2	2	1	1	0	0	20	0	1	1	2	1	2	2	4	1
937	1	1	0	4	1	0	3	2	0	0	2	2	2	1	0	0	0	20	0	1	0	3	2	2	2	4	0
938	0	2	0	2	3	0	2	1	1	1	1	2	3	1	0	0	1	20	0	1	1	2	1	2	3	5	1
939	1	1	0	4	2	0	3	2	0	0	2	3	2	1	0	0	0	20	0	1	0	3	2	3	2	5	0
940	1	4	0	2	3	0	2	2	0	0	2	2	1	1	0	0	0	20	0	1	0	2	2	2	1	3	0
941	0	4	0	1	0	0	2	2	1	1	2	2	2	1	1	0	0	20	0	1	1	2	2	2	2	4	1
942	1	5	0	3	1	0	3	3	1	1	2	3	3	1	0	0	0	20	0	1	0	3	3	3	3	6	0
943	1	2	0	3	2	0	3	2	0	1	2	3	3	1	0	0	0	20	0	1	0	3	2	3	3	6	0
944	1	5	0	2	1	0	2	1	1	0	2	2	2	1	0	0	0	20	0	1	0	2	1	2	2	4	0
945	1	4	0	3	2	0	3	2	0	1	2	3	3	1	0	0	0	20	0	1	0	3	2	3	3	6	0
946	0	2	0	4	0	0	3	3	0	0	2	3	3	1	0	0	0	20	0	1	0	3	3	3	3	6	0
947	1	1	0	2	1	0	2	2	0	0	2	2	2	1	0	0	0	20	0	1	0	2	2	2	2	4	0
948	1	1	0	3	2	0	3	1	0	1	2	3	3	1	0	0	0	20	0	1	0	3	1	3	3	6	0
949	0	5	0	1	1	0	3	3	1	0	2	3	3	1	0	0	0	20	0	1	0	3	3	3	3	6	0
950	1	2	0	3	2	0	3	2	1	1	2	3	2	1	0	0	1	20	0	1	1	3	2	3	2	5	1
951	0	5	0	2	3	0	2	2	1	1	1	2	2	1	1	0	0	20	0	1	1	2	2	2	2	4	1
952	0	4	0	2	3	1	2	1	1	1	1	2	2	1	0	1	0	20	0	1	1	2	1	2	2	4	1
953	1	3	0	1	0	0	2	1	0	0	2	2	2	1	1	0	0	20	0	1	1	2	1	2	2	4	1
954	1	1	0	4	0	0	3	2	0	0	2	2	2	1	0	0	0	20	0	1	0	3	2	2	2	4	0
955	1	5	0	2	4	0	3	3	0	0	2	3	2	1	0	0	0	20	0	1	0	3	3	3	2	5	0
956	1	3	0	3	1	0	4	1	0	0	2	4	4	1	0	0	0	20	0	1	0	3	1	3	3	6	0
957	1	2	0	4	0	0	3	3	0	0	2	3	3	1	0	0	0	20	0	1	0	3	3	3	3	6	0
958	1	3	0	2	2	0		2	0	0	2	3	3	1	0	0	0	20	0	1	0		2	3	3	6	0
959	1	1	0	3	1	0	3	2	0	1	2	3	3	1	0	0	0	20	0	1	0	3	2	3	3	6	0
960	0	4	0	1	0	0	3	2	0	1	2	3	2	1	1	0	0	20	0	1	1	3	2	3	2	5	1
961	0	2	0	2	0	0	3	2	0	1	2	2	2	1	1	0	0	20	0	1	1	3	2	2	2	4	1
962	0	4	0	1	0	1	2	1	0	0	1	2	2	1	0	0	0	20	0	1	0	2	1	2	2	4	0
963	0	4	0	2	0	0	2	1	0	1	2	2	2	1	1	0	0	20	0	1	1	2	1	2	2	4	1
964	1	4	0	1	0	0	2	1	0	1	2	2	2	1	0	0	0	20	0	1	0	2	1	2	2	4	0
965	0	3	0	2	0	1		2	0	1	2	3	3	1	1	0	0	20	0	1	1		2	3	3	6	1
966	1	2	0	3	0	0	3	2	0	0	2	2	2	1	0	0	0	20	0	1	0	3	2	2	2	4	0
967	0	5	0	2	0	1	3	2	0	1	1	2	2	1	0	0	0	20	0	1	0	3	2	2	2	4	0
968	1	1	0	1	1	1	2	2	0	1	1	2	2	1	0	0	1	20	0	1	1	2	2	2	2	4	1
969	0	2	0	4	1	0	3	3	0	0	2	3	3	1	0	0	0	20	0	1	0	3	3	3	3	6	0
970	0	5	0	1	0	1	2	1	0	0	2	2	2	1	0	0	0	20	0	1	0	2	1	2	2	4	0
971	1	5	0	3	1	0	3	3	1	1	2	3	3	1	0	0	0	20	0	1	0	3	3	3	3	6	0
972	1	1	0	4	2	0	3	2	0	0	2	3	2	1	0	0	0	20	0	1	0	3	2	3	2	5	0
973	1	3	0	2	2	1	3	3	0	1	2	3	3	1	1	0	0	20	0	1	1	3	3	3	3	6	1
974	1	4	0	1	0	0	3	1	0	0	2	3	2	1	0	0	0	20	0	1	0	3	1	3	2	5	0
975	0	4	0	1	3	0		1	1	0	2	3	3	1	0	0	0	20	0	1	0		1	3	3	6	0
976	0	4	0	2	0	1	1	1	0	1	2	2	2	1	0	0	0	20	0	1	0	1	1	2	2	4	0
977	1	1	0	3	0	0	3	2	0	1	2	3	3	1	0	0	0	20	0	1	0	3	2	3	3	6	0
978	1	3	0	2	2	0	3	1	0	0	2	3	3	1	0	0	0	20	0	1	0	3	1	3	3	6	0
979	1	1	0	2	2	0	2	2	0	0	2	2	2	1	0	0	0	20	0	1	0	2	2	2	2	4	0
980	0	4	0	4	0	0	2	1	0	1	2	2	2	1	0	0	1	20	0	1	1	2	1	2	2	4	1
981	1	1	0	1	0	0	2	2	1	0	1	2	2	1	0	0	1	20	0	1	1	2	2	2	2	4	1
982	0	1	0	1	3	0	3	2	0	1	2	3	3	1	0	0	1	20	0	1	1	3	2	3	3	6	1
983	0	1	0	2	0	1	2	2	1	1	1	3	3	1	0	0	1	20	0	1	1	2	2	3	3	6	1
984	1	1	0	3	2	0	3	2	1	1	2	3	3	1	0	0	0	20	0	1	0	3	2	3	3	6	0
985	1	1	0	3	0	0	3	2	1	0	2	3	3	1	0	0	0	20	0	1	0	3	2	3	3	6	0
986	1	4	0	2	2	0	3	2	0	0	2	3	2	1	0	0	0	20	0	1	0	3	2	3	2	5	0
987	0	1	0	3	0	0	3	3	0	1	2	3	3	1	0	0	0	20	0	1	0	3	3	3	3	6	0
988	0	5	0	2	0	1	3	2	0	1	1	2	2	1	0	0	0	20	0	1	0	3	2	2	2	4	0
989	0	1	0	3	3	0	3	3	1	0	2	3	3	1	1	0	0	20	0	1	1	3	3	3	3	6	1
990	0	2	0	3	1	1	3	3	0	1	2	2	2	1	0	0	0	20	0	1	0	3	3	2	2	4	0
991	0	2	0	2	0	0	4	2	1	1	2	3	2	1	0	0	1	20	0	1	1	3	2	3	2	5	1
992	1	1	0	3	2	0	3	2	0	0	2	3	3	1	0	0	0	20	0	1	0	3	2	3	3	6	0
993	0	4	0	2	0	0	3	1	0	0	2	3	3	1	0	0	0	20	0	1	0	3	1	3	3	6	0
994	0	3	0	2	0	1	3	3	1	1	2	3	3	1	1	0	0	20	0	1	1	3	3	3	3	6	1
995	1	1	0	2	2	1	2	2	0	0	2	3	3	1	1	0	0	20	0	1	1	2	2	3	3	6	1
996	1	1	0	3	2	0	3	1	0	1	2	3	3	1	0	0	0	20	0	1	0	3	1	3	3	6	0
997	0	2	0	3	4	0	3	3	0	0	2	3	3	1	0	0	0	20	0	1	0	3	3	3	3	6	0
998	0	1	0	2	3	1	3	3	0	1	2	3	3	1	1	0	0	20	0	1	1	3	3	3	3	6	1
999	0	4	0	3	3	1		2	0	1	2	3	3	1	0	0	0	20	0	1	0		2	3	3	6	0
1000	1	1	0	2	2	0	2	2	0	0	2	2	2	1	0	0	0	20	0	1	0	2	2	2	2	4	0
1001	1	1	0	1	1	1	2	2	0	1	1	2	2	1	0	0	1	20	0	1	1	2	2	2	2	4	1
1002	0	4	0	3	3	1		1	1	1	2	3	3	1	1	0	0	20	0	1	1		1	3	3	6	1
1003	0	1	0	2	0	1	2	2	1	1	1	2	2	1	0	0	1	20	0	1	1	2	2	2	2	4	1
1004	0	4	0	3	1	0	3	2	0	1	2	3	3	1	0	0	0	20	0	1	0	3	2	3	3	6	0
1005	0	4	0	2	3	1		1	1	1	1	3	3	1	0	0	1	20	0	1	1		1	3	3	6	1
1006	0	4	0	3	3	1		1	1	1	2	3	3	1	1	0	0	20	0	1	1		1	3	3	6	1
1007	1	1	0	2	1	1	2	2	0	1	0	2	2	1	1	0	0	20	0	1	1	2	2	2	2	4	1
1008	1	4	0	1	2	0	1	1	0	0	2	2	2	1	0	0	0	20	0	1	0	1	1	2	2	4	0
1009	1	1	0	4	0	0	3	3	0	0	2	3	3	1	0	0	0	20	0	1	0	3	3	3	3	6	0
1010	0	5	0	3	4	1	1	1	0	1	1	1	2	1	0	0	1	20	0	1	1	1	1	1	2	3	1
1011	0	4	0	1	3	0		2	1	0	1	3	3	1	1	0	0	20	0	1	1		2	3	3	6	1
1012	0	4	0	3	4	0	2	2	0	0	2	2	2	1	0	0	0	20	0	1	0	2	2	2	2	4	0
1013	0	4	0	3	3	0		1	1	1	1	3	3	1	0	0	1	20	0	1	1		1	3	3	6	1
1014	0	1	0	2	0	0	3	2	1	0	1	3	2	1	0	0	1	20	0	1	1	3	2	3	2	5	1
1015	0	2	0	2	0	1	3	2	1	1	1	2	2	1	0	0	1	20	0	1	1	3	2	2	2	4	1
1016	1	3	0	2	2	0	3	1	0	0	2	3	3	1	0	0	0	20	0	1	0	3	1	3	3	6	0
1017	1	5	0	2	3	0	1	2	1	1	1	2	2	1	1	0	0	20	0	1	1	1	2	2	2	4	1
1018	1	2	0	2	2	1	3	2	0	0	2	2	2	1	1	0	0	20	0	1	1	3	2	2	2	4	1
1019	1	2	0	3	0	0	3	2	0	0	2	2	2	1	0	0	0	20	0	1	0	3	2	2	2	4	0
1020	0	1	0	3	3	0	3	3	1	0	2	3	3	1	1	0	0	20	0	1	1	3	3	3	3	6	1
1021	0	2	0	1	3	0	1	2	1	1	1	2	2	1	1	0	0	20	0	1	1	1	2	2	2	4	1
1022	0	4	0	2	0	1		1	1	1	1	3	3	1	0	0	1	20	0	1	1		1	3	3	6	1
1023	1	2	0	4	0	0	3	3	0	0	2	3	3	1	0	0	0	20	0	1	0	3	3	3	3	6	0
1024	0	3	0	3	0	0	4	2	1	1	2	4	2	1	1	0	0	20	0	1	1	3	2	3	2	5	1
1025	0	1	0	2	1	0	2	1	0	0	2	2	3	1	1	0	0	20	0	1	1	2	1	2	3	5	1
1026	0	2	0	4	1	1	3	1	1	1	1	3	2	1	0	0	1	20	0	1	1	3	1	3	2	5	1
1027	0	2	0	2	3	0	1	2	0	1	2	2	2	1	0	0	1	20	0	1	1	1	2	2	2	4	1
1028	0	4	0	1	0	1		1	0	1	1	3	3	1	0	0	0	20	0	1	0		1	3	3	6	0
1029	0	4	0	3	3	0		1	0	1	2	3	3	1	0	0	0	20	0	1	0		1	3	3	6	0
1030	0	4	0	1	1	0	3	2	0	0	2	2	1	1	0	0	0	20	0	1	0	3	2	2	1	3	0
1031	0	3	0	1	3	0	1	2	1	0	1	1	2	1	1	0	0	20	0	1	1	1	2	1	2	3	1
1032	0	2	0	2	3	0	2	2	0	1	2	2	2	1	0	0	1	20	0	1	1	2	2	2	2	4	1
1033	1	5	0	4	1	0	1	1	1	1	2	1	2	1	0	0	0	20	0	1	0	1	1	1	2	3	0
1034	0	4	0	2	3	1	2	1	1	1	1	2	2	1	0	1	0	20	0	1	1	2	1	2	2	4	1
1035	0	2	0	3	3	1	3	2	1	1	2	3	3	1	1	0	0	20	0	1	1	3	2	3	3	6	1
1036	1	2	0	2	1	1	1	2	1	1	1	2	2	1	0	0	1	20	0	1	1	1	2	2	2	4	1
1037	0	1	0	4	1	0	3	3	0	0	2	3	3	1	0	0	0	20	0	1	0	3	3	3	3	6	0
1038	0	3	0	3	3	1	3	3	1	1	2	3	3	1	1	0	0	20	0	1	1	3	3	3	3	6	1
1039	0	2	0	3	1	0	3	2	0	1	2	2	2	1	0	0	0	20	0	1	0	3	2	2	2	4	0
1040	0	3	0	1	0	0	1	2	0	1	2	1	2	1	1	0	0	20	0	1	1	1	2	1	2	3	1
1041	0	2	0	1	3	0	1	2	1	0	1	2	2	1	0	1	0	20	0	1	1	1	2	2	2	4	1
1042	0	2	0	3	0	1	3	3	0	1	2	2	2	1	0	0	0	20	1	1	0	3	3	2	2	4	1
1043	0	5	0	3	3	0	1	1	1	0	1	1	2	1	1	0	0	20	0	1	1	1	1	1	2	3	1
1044	0	4	0	3	3	0		1	1	1	1	3	3	1	0	0	1	20	0	1	1		1	3	3	6	1
1045	0	5	0	2	0	1	3	2	1	1	1	3	2	1	1	0	0	20	0	1	1	3	2	3	2	5	1
1046	0	4	0	1	0	0	2	1	1	0	2	2	2	1	1	0	0	20	0	1	1	2	1	2	2	4	1
1047	1	5	0	3	1	0	3	3	1	1	2	3	3	1	0	0	0	20	0	1	0	3	3	3	3	6	0
1048	1	1	0	3	2	0	3	2	1	1	2	3	3	1	0	0	0	20	0	1	0	3	2	3	3	6	0
1049	0	4	0	1	3	0		2	1	1	1	3	3	1	1	0	0	20	0	1	1		2	3	3	6	1
1050	0	1	0	1	0	1	1	1	1	1	2	2	2	1	0	0	0	20	0	1	0	1	1	2	2	4	0
1051	1	4	0	1	2	0	2	1	0	0	2	2	2	1	0	0	0	20	0	1	0	2	1	2	2	4	0
1052	1	5	0	2	1	0	3	2	1	0	2	3	3	1	0	0	0	20	0	1	0	3	2	3	3	6	0
1053	0	5	0	2	0	1	3	2	0	1	1	2	2	1	0	0	0	20	0	1	0	3	2	2	2	4	0
1054	0	4	0	3	3	1		1	1	1	2	3	3	1	1	0	0	20	1	1	1		1	3	3	6	2
1055	0	4	0	1	0	0	2	2	0	0	2	2	1	1	0	0	0	20	0	1	0	2	2	2	1	3	0
1056	0	2	0	3	3	1	3	2	1	1	2	3	3	1	1	0	0	20	0	1	1	3	2	3	3	6	1
1057	0	2	0	1	4	0	3	1	1	1	2	3	2	1	0	1	0	20	0	1	1	3	1	3	2	5	1
1058	0	5	0	3	1	0	3	2	1	1	2	1	2	1	0	0	0	20	0	1	0	3	2	1	2	3	0
1059	1	2	0	4	0	0	3	3	0	0	2	3	3	1	0	0	0	20	0	1	0	3	3	3	3	6	0
1060	1	2	0	3	0	0	3	2	0	0	2	2	2	1	0	0	0	20	0	1	0	3	2	2	2	4	0
1061	0	4	0	2	0	1		1	1	1	1	3	3	1	0	0	1	20	0	1	1		1	3	3	6	1
1062	0	2	0	1	3	0	1	2	1	1	2	2	2	1	1	0	0	20	0	1	1	1	2	2	2	4	1
1063	0	3	0	2	0	0	3	3	0	1	2	3	3	1	1	0	0	20	0	1	1	3	3	3	3	6	1
1064	1	1	0	3	0	0	3	1	0	0	2	3	3	1	0	0	0	20	0	1	0	3	1	3	3	6	0
1065	0	5	0	1	3	1	2	2	0	1	1	2	2	1	0	0	1	20	0	1	1	2	2	2	2	4	1
1066	1	3	0	3	0	0	3	3	0	0	2	3	3	1	0	0	0	20	0	1	0	3	3	3	3	6	0
1067	0	4	0	2	0	1		1	1	1	1	3	3	1	0	0	1	20	0	1	1		1	3	3	6	1
1068	0	2	0	2	0	1	3	2	1	1	1	2	2	1	0	0	1	20	0	1	1	3	2	2	2	4	1
1069	0	4	0	2	3	1		1	1	1	1	3	3	1	0	0	1	20	0	1	1		1	3	3	6	1
1070	0	4	0	3	2	0	3	2	0	0	2	3	2	1	0	0	0	20	0	1	0	3	2	3	2	5	0
1071	0	5	0	1	1	0	3	3	1	0	2	3	3	1	0	0	0	20	0	1	0	3	3	3	3	6	0
1072	1	2	0	3	2	0	3	3	1	0	2	3	3	1	0	0	0	20	0	1	0	3	3	3	3	6	0
1073	0	1	0	2	4	0	2	2	0	0	2	2	2	1	0	0	1	20	0	1	1	2	2	2	2	4	1
1074	1	1	0	4	2	0	3	2	0	0	2	3	2	1	0	0	0	20	0	1	0	3	2	3	2	5	0
1075	1	2	0	3	0	0	3	3	0	0	2	3	3	1	0	0	0	20	0	1	0	3	3	3	3	6	0
1076	0	4	0	1	0	0	2	1	1	0	2	2	2	1	1	0	0	20	0	1	1	2	1	2	2	4	1
1077	1	2	0	4	0	0	3	3	0	0	2	3	3	1	0	0	0	20	0	1	0	3	3	3	3	6	0
1078	0	1	0	3	3	1	3	3	1	1	2	3	3	1	1	0	0	20	0	1	1	3	3	3	3	6	1
1079	1	1	0	3	0	0	3	2	0	0	2	2	2	1	0	0	0	20	0	1	0	3	2	2	2	4	0
1080	1	2	0	3	0	0	3	2	0	0	2	2	2	1	0	0	0	20	0	1	0	3	2	2	2	4	0
1081	0	2	0	4	0	0	3	3	0	0	2	3	3	1	0	0	0	20	0	1	0	3	3	3	3	6	0
1082	0	3	0	2	0	1		2	1	1	1	3	3	1	0	0	1	20	0	1	1		2	3	3	6	1
1083	0	3	0	3	4	1	2	1	1	1	0	2	1	1	0	1	0	20	0	1	1	2	1	2	1	3	1
1084	1	3	0	3	2	0	3	3	0	0	2	3	3	1	0	0	0	20	0	1	0	3	3	3	3	6	0
1085	1	3	0	4	0	0	3	3	0	0	2	3	3	1	0	0	0	20	0	1	0	3	3	3	3	6	0
1086	0	5	0	1	3	1	2	1	0	1	1	2	2	1	0	0	1	20	0	1	1	2	1	2	2	4	1
1087	0	3	0	2	0	1		2	1	1	1	3	3	1	0	0	1	20	0	1	1		2	3	3	6	1
1088	1	2	0	3	2	0	3	2	0	0	2	2	2	1	0	0	0	20	0	1	0	3	2	2	2	4	0
1089	1	2	0	4	0	0	3	3	0	0	2	3	3	1	0	0	0	20	0	1	0	3	3	3	3	6	0
1090	1	3	0	2	2	0		2	0	0	2	3	3	1	0	0	0	20	0	1	0		2	3	3	6	0
1091	1	2	0	3	0	0	3	2	0	0	2	3	3	1	0	0	0	20	0	1	0	3	2	3	3	6	0
1092	1	4	0	2	1	1		1	1	1	1	3	3	1	0	0	1	20	0	1	1		1	3	3	6	1
1093	0	5	0	1	0	1	2	1	0	1	2	2	2	1	0	0	0	20	0	1	0	2	1	2	2	4	0
1094	1	3	0	3	1	0	3	3	0	0	2	3	2	1	0	0	0	20	0	1	0	3	3	3	2	5	0
1095	1	3	0	2	0	1		2	1	1	2	3	3	1	0	0	0	20	0	1	0		2	3	3	6	0
1096	1	2	0	3	1	1	3	2	0	1	2	2	2	1	0	0	0	20	0	1	0	3	2	2	2	4	0
1097	0	1	0	1	3	0	1	2	1	0	2	1	1	1	0	0	0	20	0	1	0	1	2	1	1	2	0
1098	0	1	0	2	1	0	2	2	0	0	2	2	2	1	0	0	0	20	0	1	0	2	2	2	2	4	0
1099	0	5	0	2	0	1	3	2	1	1	1	2	2	1	0	0	0	20	0	1	0	3	2	2	2	4	0
1100	1	1	0	4	0	0	3	2	0	0	2	2	2	1	0	0	0	20	0	1	0	3	2	2	2	4	0
1101	1	3	0	3	0	0		2	0	1	2	3	3	1	0	0	0	20	0	1	0		2	3	3	6	0
1102	1	3	0	3	0	0	3	2	0	0	2	4	2	1	0	0	0	20	0	1	0	3	2	3	2	5	0
1103	1	4	0	2	4	0	2	2	0	0	2	2	1	1	0	0	0	20	0	1	0	2	2	2	1	3	0
1104	0	3	0	3	4	0	3	2	1	0	2	3	3	1	0	1	0	20	0	1	1	3	2	3	3	6	1
1105	1	3	0	2	2	1	3	3	0	1	2	3	3	1	1	0	0	20	0	1	1	3	3	3	3	6	1
1106	0	1	0	1	3	0	2	2	1	1	2	2	2	1	1	0	0	20	0	1	1	2	2	2	2	4	1
1107	1	1	0	3	0	0	3	2	1	0	2	3	3	1	0	0	0	20	0	1	0	3	2	3	3	6	0
1108	1	1	0	2	2	0	2	2	0	0	2	2	2	1	0	0	0	20	0	1	0	2	2	2	2	4	0
1109	0	4	0	3	4	0	2	2	0	0	2	2	2	1	0	0	0	20	0	1	0	2	2	2	2	4	0
1110	1	3	0	2	2	0		2	1	1	2	3	3	1	0	0	1	20	0	1	1		2	3	3	6	1
1111	0	3	0	1	3	0	3	3	1	1	2	3	3	1	1	0	0	20	0	1	1	3	3	3	3	6	1
1112	0	1	0	4	1	0	3	2	0	1	2	2	2	1	0	0	0	20	0	1	0	3	2	2	2	4	0
1113	1	3	0	2	2	0		2	0	0	2	3	3	1	0	0	0	20	0	1	0		2	3	3	6	0
1114	1	4	0	1	2	0	2	1	0	0	2	2	2	1	0	0	0	20	0	1	0	2	1	2	2	4	0
1115	0	4	0	1	0	0	3	1	0	1	2	3	2	1	1	0	0	20	0	1	1	3	1	3	2	5	1
1116	0	3	0	2	0	1	3	1	1	1	2	3	2	1	1	0	0	20	0	1	1	3	1	3	2	5	1
1117	0	4	0	3	3	1		1	1	1	2	3	3	1	1	0	0	20	0	1	1		1	3	3	6	1
1118	0	5	0	2	4	0	3	2	0	0	2	2	2	1	0	0	0	20	0	1	0	3	2	2	2	4	0
1119	0	2	0	1	2	0	1	2	1	0	2	2	2	1	0	0	0	20	0	1	0	1	2	2	2	4	0
1120	0	2	0	3	3	0	2	1	0	1	2	2	2	1	0	0	1	20	0	1	1	2	1	2	2	4	1
1121	0	2	0	3	3	0	3	2	0	1	2	3	3	1	0	0	0	20	0	1	0	3	2	3	3	6	0
1122	1	4	0	2	0	0	2	1	0	1	2	2	2	1	0	0	0	20	0	1	0	2	1	2	2	4	0
1123	0	1	0	2	0	1	2	2	1	1	1	3	3	1	0	0	1	20	0	1	1	2	2	3	3	6	1
1124	0	2	0	4	3	0	2	1	1	1	2	2	2	1	0	1	0	20	0	1	1	2	1	2	2	4	1
1125	1	2	0	3	2	1	3	3	0	1	2	2	2	1	0	0	0	20	0	1	0	3	3	2	2	4	0
1126	0	4	0	1	3	0		1	1	0	2	3	3	1	0	0	0	20	0	1	0		1	3	3	6	0
1127	0	2	0	2	3	0	3	3	0	1	2	3	2	1	0	0	1	20	0	1	1	3	3	3	2	5	1
1128	0	1	0	1	3	0	1	2	1	0	2	1	1	1	0	0	0	20	0	1	0	1	2	1	1	2	0
1129	0	4	0	3	2	0	3	2	0	0	2	3	2	1	0	0	0	20	0	1	0	3	2	3	2	5	0
1130	0	2	0	3	3	0	3	2	1	0	2	3	3	1	1	0	0	20	0	1	1	3	2	3	3	6	1
1131	1	1	0	4	2	0	3	1	0	0	2	3	2	1	0	0	0	20	0	1	0	3	1	3	2	5	0
1132	1	1	0	3	0	0	3	2	0	0	2	3	3	1	0	0	0	20	0	1	0	3	2	3	3	6	0
1133	0	1	0	4	1	0	3	1	0	0	2	3	2	1	0	0	0	20	0	1	0	3	1	3	2	5	0
1134	1	3	0	2	0	0	2	1	0	0	2	2	2	1	0	0	0	20	0	1	0	2	1	2	2	4	0
1135	0	2	0	2	0	1	3	2	0	0	2	2	2	1	1	0	0	20	0	1	1	3	2	2	2	4	1
1136	0	1	0	1	0	0	2	2	0	1	2	2	2	1	0	0	0	20	0	1	0	2	2	2	2	4	0
1137	0	2	0	2	3	0	3	1	1	1	1	3	3	1	0	0	1	20	0	1	1	3	1	3	3	6	1
1138	0	2	0	3	3	1	3	2	1	1	2	3	3	1	1	0	0	20	0	1	1	3	2	3	3	6	1
1139	0	1	0	3	1	1	3	3	0	1	0	3	3	1	1	0	0	20	0	1	1	3	3	3	3	6	1
1140	1	2	0	3	0	0	3	2	0	0	2	2	2	1	0	0	0	20	0	1	0	3	2	2	2	4	0
1141	0	1	0	3	0	0	3	2	0	1	2	3	3	1	0	0	0	20	0	1	0	3	2	3	3	6	0
1142	1	2	0	3	2	0	3	3	1	0	2	3	3	1	0	0	0	20	0	1	0	3	3	3	3	6	0
1143	1	1	0	3	4	0	3	3	0	1	2	3	3	1	0	0	0	20	0	1	0	3	3	3	3	6	0
1144	1	2	0	3	0	0	3	2	0	0	2	2	2	1	0	0	0	20	0	1	0	3	2	2	2	4	0
1145	0	5	0	1	1	0	2	1	1	0	2	2	2	1	0	0	0	20	0	1	0	2	1	2	2	4	0
1146	1	5	0	2	3	0	1	2	1	1	1	2	2	1	1	0	0	20	0	1	1	1	2	2	2	4	1
1147	1	2	0	3	0	0	3	2	0	0	2	2	2	1	0	0	0	20	0	1	0	3	2	2	2	4	0
1148	0	1	0	4	0	0	3	2	0	0	2	2	2	1	0	0	0	20	0	1	0	3	2	2	2	4	0
1149	0	5	0	1	1	0	3	3	1	0	2	3	3	1	0	0	0	20	0	1	0	3	3	3	3	6	0
1150	0	4	0	1	3	0		1	1	1	2	3	3	1	1	0	0	20	0	1	1		1	3	3	6	1
1151	0	5	0	2	3	0	2	1	0	0	2	2	1	1	0	0	0	20	0	1	0	2	1	2	1	3	0
1152	1	2	0	4	0	0	3	3	0	0	2	3	3	1	0	0	0	20	0	1	0	3	3	3	3	6	0
1153	0	1	0	4	0	0	3	2	0	0	2	2	2	1	0	0	0	20	0	1	0	3	2	2	2	4	0
1154	0	5	0	1	0	1	2	1	0	0	2	2	2	1	0	0	0	20	0	1	0	2	1	2	2	4	0
1155	0	3	0	3	3	0	3	3	1	1	2	3	3	1	1	0	0	20	0	1	1	3	3	3	3	6	1
1156	1	2	0	4	0	0	3	3	1	0	2	3	3	1	0	0	0	20	0	1	0	3	3	3	3	6	0
1157	0	2	0	3	0	1	2	1	0	1	2	2	2	1	0	0	0	20	1	1	0	2	1	2	2	4	1
1158	0	2	0	2	0	1	3	2	1	1	1	2	2	1	0	0	1	20	0	1	1	3	2	2	2	4	1
1159	1	1	0	2	2	0	2	2	0	0	2	2	2	1	0	0	0	20	0	1	0	2	2	2	2	4	0
1160	0	2	0	3	3	0	2	1	0	1	2	2	2	1	0	0	1	20	0	1	1	2	1	2	2	4	1
1161	0	4	0	1	3	0		2	0	1	2	3	3	1	0	0	1	20	0	1	1		2	3	3	6	1
1162	0	4	0	2	3	1	2	1	1	1	1	2	2	1	0	1	0	20	0	1	1	2	1	2	2	4	1
1163	0	3	0	2	0	1		2	1	1	1	3	3	1	0	0	1	20	0	1	1		2	3	3	6	1
1164	1	1	0	3	4	0	3	3	0	1	2	3	3	1	0	0	0	20	0	1	0	3	3	3	3	6	0
1165	1	3	0	3	2	0	3	3	0	0	2	3	3	1	0	0	0	20	0	1	0	3	3	3	3	6	0
1166	0	4	0	3	1	0	3	2	0	0	2	3	2	1	0	0	0	20	0	1	0	3	2	3	2	5	0
1167	0	2	0	3	3	0	3	2	1	0	2	3	3	1	1	0	0	20	0	1	1	3	2	3	3	6	1
1168	1	1	0	2	2	1	2	2	0	0	2	2	2	1	1	0	0	20	0	1	1	2	2	2	2	4	1
1169	0	2	0	4	0	0	3	3	0	0	2	3	3	1	0	0	0	20	0	1	0	3	3	3	3	6	0
1170	0	1	0	4	0	1	3	2	0	0	2	2	2	1	0	0	0	20	0	1	0	3	2	2	2	4	0
1171	1	3	0	1	0	0	3	3	1	0	2	3	3	1	0	0	0	20	0	1	0	3	3	3	3	6	0
1172	0	4	0	2	0	0	3	3	0	1	2	3	2	1	0	0	1	20	0	1	1	3	3	3	2	5	1
1173	1	3	0	2	0	0		2	0	0	2	3	3	1	0	0	0	20	0	1	0		2	3	3	6	0
1174	0	1	0	1	3	0	2	2	1	1	2	2	2	1	1	0	0	20	0	1	1	2	2	2	2	4	1
1175	0	2	0	3	1	1	3	3	1	1	2	2	2	1	0	0	0	20	0	1	0	3	3	2	2	4	0
1176	1	1	0	3	0	0	3	2	0	0	2	2	2	1	0	0	0	20	0	1	0	3	2	2	2	4	0
1177	1	2	0	3	0	0	3	2	0	0	2	2	2	1	0	0	0	20	0	1	0	3	2	2	2	4	0
1178	1	5	0	2	1	0	3	2	1	0	2	3	3	1	0	0	0	20	0	1	0	3	2	3	3	6	0
1179	0	3	0	3	3	0	3	3	1	1	2	3	3	1	1	0	0	20	0	1	1	3	3	3	3	6	1
1180	0	1	0	2	0	0	2	2	0	1	2	3	3	1	1	0	0	20	0	1	1	2	2	3	3	6	1
1181	1	5	0	2	1	0	2	1	1	0	2	2	2	1	0	0	0	20	0	1	0	2	1	2	2	4	0
1182	0	3	0	1	0	1	1	2	0	0	1	1	2	1	0	0	0	20	0	1	0	1	2	1	2	3	0
1183	0	3	0	1	3	0	1	2	1	0	2	1	2	1	1	0	0	20	0	1	1	1	2	1	2	3	1
1184	1	1	0	3	0	0	3	1	0	0	2	3	3	1	0	0	0	20	0	1	0	3	1	3	3	6	0
1185	0	4	0	1	0	0		2	0	1	2	3	3	1	0	0	1	20	0	1	1		2	3	3	6	1
1186	1	1	0	3	0	0	3	2	0	0	2	3	3	1	0	0	0	20	0	1	0	3	2	3	3	6	0
1187	1	2	0	4	0	0	3	3	0	0	2	3	3	1	0	0	0	20	0	1	0	3	3	3	3	6	0
1188	0	4	0	2	3	1	2	1	1	1	1	2	2	1	0	1	0	20	0	1	1	2	1	2	2	4	1
1189	0	1	0	4	0	0	3	2	0	0	2	2	2	1	0	0	0	20	0	1	0	3	2	2	2	4	0
1190	1	3	0	3	0	0	3	2	0	1	2	3	3	1	0	0	0	20	0	1	0	3	2	3	3	6	0
1191	1	2	0	3	2	0	3	2	0	0	2	2	2	1	0	0	0	20	0	1	0	3	2	2	2	4	0
1192	1	4	0	2	1	1		1	1	1	1	3	3	1	0	0	1	20	0	1	1		1	3	3	6	1
1193	1	4	0	1	0	1	2	1	1	0	2	2	1	1	0	0	0	20	0	1	0	2	1	2	1	3	0
1194	0	4	0	2	0	1		1	1	1	1	3	3	1	0	0	1	20	0	1	1		1	3	3	6	1
1195	1	4	0	3	2	0	3	2	0	1	2	3	3	1	0	0	0	20	0	1	0	3	2	3	3	6	0
1196	1	1	0	3	0	0	3	3	0	0	2	3	3	1	0	0	0	20	0	1	0	3	3	3	3	6	0
1197	1	2	0	3	0	0	3	2	0	0	2	2	2	1	0	0	0	20	0	1	0	3	2	2	2	4	0
1198	0	1	0	4	0	0	3	2	0	0	2	2	2	1	0	0	0	20	0	1	0	3	2	2	2	4	0
1199	0	2	0	3	3	1	3	2	1	1	2	3	3	1	1	0	0	20	0	1	1	3	2	3	3	6	1
1200	1	2	0	3	0	0	3	2	0	0	2	2	2	1	0	0	0	20	0	1	0	3	2	2	2	4	0
1201	0	4	0	1	0	0	3	2	1	0	2	3	2	1	1	0	0	20	0	1	1	3	2	3	2	5	1
1202	1	3	0	4	0	0	3	3	0	0	2	3	3	1	0	0	0	20	0	1	0	3	3	3	3	6	0
1203	1	2	0	3	0	0	3	2	0	0	2	2	2	1	0	0	0	20	0	1	0	3	2	2	2	4	0
1204	0	4	0	1	0	0		2	0	1	2	3	3	1	0	0	1	20	0	1	1		2	3	3	6	1
1205	1	3	0	3	0	0		2	0	1	2	3	3	1	0	0	0	20	0	1	0		2	3	3	6	0
1206	1	5	0	2	1	0	2	1	1	0	2	2	2	1	0	0	0	20	0	1	0	2	1	2	2	4	0
1207	0	3	0	1	4	1	1	2	0	1	1	1	2	1	0	0	1	20	0	1	1	1	2	1	2	3	1
1208	0	2	0	2	0	0	3	2	0	1	2	2	2	1	1	0	0	20	0	1	1	3	2	2	2	4	1
1209	0	4	0	1	1	1	2	1	1	0	2	2	1	1	0	0	0	20	0	1	0	2	1	2	1	3	0
1210	0	4	0	1	0	0		2	0	1	2	3	3	1	0	0	1	20	0	1	1		2	3	3	6	1
1211	1	1	0	3	0	0	3	2	1	0	2	3	3	1	0	0	0	20	0	1	0	3	2	3	3	6	0
1212	1	2	0	4	0	0	3	3	0	0	2	3	3	1	0	0	0	20	0	1	0	3	3	3	3	6	0
1213	1	3	0	1	0	0	1	2	0	1	2	2	2	1	0	0	1	16	4	1	1	1	2	2	2	4	5
1214	1	2	0	3	1	1	3	2	0	1	2	2	2	1	0	0	0	20	0	1	0	3	2	2	2	4	0
1215	0	2	0	4	1	0	3	3	0	0	2	3	3	1	0	0	0	20	0	1	0	3	3	3	3	6	0
1216	0	5	0	2	0	1	3	2	1	1	1	2	2	1	0	0	0	20	0	1	0	3	2	2	2	4	0
1217	1	4	0	1	2	0	2	1	0	0	2	2	2	1	0	0	0	20	0	1	0	2	1	2	2	4	0
1218	1	2	0	3	2	0	3	3	1	1	2	3	4	1	1	0	0	20	0	1	1	3	3	3	3	6	1
1219	0	1	0	3	3	0	3	3	1	0	2	3	3	1	1	0	0	20	0	1	1	3	3	3	3	6	1
1220	0	3	0	2	0	1	3	3	1	1	2	3	3	1	1	0	0	20	0	1	1	3	3	3	3	6	1
1221	1	1	0	3	2	0	3	2	0	0	2	3	3	1	0	0	0	20	0	1	0	3	2	3	3	6	0
1222	1	2	0	3	1	1	3	2	0	1	2	2	2	1	0	0	0	20	0	1	0	3	2	2	2	4	0
1223	1	2	0	3	0	0	3	2	0	0	2	3	3	1	0	0	0	20	0	1	0	3	2	3	3	6	0
1224	1	3	0	4	0	0	3	3	0	0	2	3	3	1	0	0	0	20	0	1	0	3	3	3	3	6	0
1225	0	5	0	1	3	1	2	2	0	1	1	2	2	1	0	0	1	20	0	1	1	2	2	2	2	4	1
1226	0	5	0	3	1	0	3	1	1	1	2	3	3	1	0	0	0	20	0	1	0	3	1	3	3	6	0
1227	1	3	0	3	1	0	3	3	0	0	2	3	2	1	0	0	0	20	0	1	0	3	3	3	2	5	0
1228	0	5	0	2	0	1	3	2	1	1	1	2	2	1	1	0	0	20	0	1	1	3	2	2	2	4	1
1229	1	1	0	3	2	0	3	2	0	1	2	3	3	1	0	0	0	20	0	1	0	3	2	3	3	6	0
1230	0	3	0	1	0	1	1	2	0	1	1	1	2	1	0	0	0	20	0	1	0	1	2	1	2	3	0
1231	1	2	0	3	0	0	3	3	0	0	2	3	3	1	0	0	0	20	0	1	0	3	3	3	3	6	0
1232	1	3	0	1	0	0	3	3	1	0	2	3	3	1	0	0	0	20	0	1	0	3	3	3	3	6	0
1233	0	2	0	2	3	0	3	2	1	1	1	2	2	1	0	1	0	20	0	1	1	3	2	2	2	4	1
1234	0	3	0	3	4	0	3	3	0	0	2	3	2	1	0	0	0	20	0	1	0	3	3	3	2	5	0
1235	0	1	0	2	0	0	2	2	0	1	2	3	3	1	1	0	0	20	0	1	1	2	2	3	3	6	1
1236	0	4	0	2	3	0	2	1	1	1	1	2	1	1	0	0	1	20	0	1	1	2	1	2	1	3	1
1237	1	3	0	1	2	0	1	1	1	0	2	1	1	1	0	0	0	20	0	1	0	1	1	1	1	2	0
1238	1	1	0	3	1	0	3	3	0	1	2	3	3	1	0	0	0	20	0	1	0	3	3	3	3	6	0
1239	0	1	0	1	3	0	3	2	1	0	2	3	3	1	0	0	0	20	0	1	0	3	2	3	3	6	0
1240	0	3	0	3	1	0	3	3	0	0	2	3	2	1	0	0	0	20	0	1	0	3	3	3	2	5	0
1241	0	1	0	3	3	0	3	3	1	0	2	3	3	1	1	0	0	20	0	1	1	3	3	3	3	6	1
1242	0	4	0	1	0	0	2	2	1	0	2	2	2	1	1	0	0	20	0	1	1	2	2	2	2	4	1
1243	1	5	0	2	1	0	2	1	1	0	2	2	2	1	0	0	0	20	0	1	0	2	1	2	2	4	0
1244	1	3	0	2	1	1		2	0	1	2	3	3	1	0	0	0	20	0	1	0		2	3	3	6	0
1245	0	4	0	2	0	1		1	1	1	1	3	3	1	0	0	1	20	0	1	1		1	3	3	6	1
1246	1	3	0	3	2	0	3	3	0	0	2	3	3	1	0	0	0	20	0	1	0	3	3	3	3	6	0
1247	1	3	0	3	2	0	3	3	0	0	2	3	2	1	0	0	0	20	0	1	0	3	3	3	2	5	0
1248	1	4	0	3	1	0		2	0	1	2	3	3	1	0	0	0	20	0	1	0		2	3	3	6	0
1249	1	1	0	3	0	0	3	2	0	1	2	3	3	1	0	0	0	20	0	1	0	3	2	3	3	6	0
1250	1	5	0	3	0	1	3	2	1	1	2	3	3	1	0	0	0	20	0	1	0	3	2	3	3	6	0
1251	1	3	0	2	2	0	3	3	1	0	2	3	4	1	1	0	0	20	0	1	1	3	3	3	3	6	1
1252	0	1	0	1	4	1	2	1	1	1	1	2	2	1	0	1	0	20	0	1	1	2	1	2	2	4	1
1253	0	2	0	4	1	0	3	3	0	0	2	3	3	1	0	0	0	20	0	1	0	3	3	3	3	6	0
1254	0	2	0	3	3	1	3	3	1	1	2	3	3	1	1	0	0	20	0	1	1	3	3	3	3	6	1
1255	1	2	0	1	0	1	2	2	0	1	2	2	2	1	1	0	0	20	0	1	1	2	2	2	2	4	1
1256	0	4	0	2	3	1	2	1	1	1	1	2	2	1	0	1	0	20	0	1	1	2	1	2	2	4	1
1257	1	3	0	3	2	0	3	3	0	0	2	3	3	1	0	0	0	20	0	1	0	3	3	3	3	6	0
1258	0	5	0	2	0	1	2	1	0	0	1	1	2	1	0	0	0	20	0	1	0	2	1	1	2	3	0
1259	0	2	0	3	3	1	2	2	1	1	2	3	3	1	1	0	0	20	0	1	1	2	2	3	3	6	1
1380	1	1	0	1	3	0	2	2	1	1	1	2	2	2	1	0	0	20	0	1	1	2	2	2	2	4	1
1381	0	1	0	1	3	0	2	2	1	0	2	2	2	2	0	0	0	20	0	1	0	2	2	2	2	4	0
1382	0	5	0	1	3	1	2	3	0	1	1	3	3	2	0	0	1	20	0	1	1	2	3	3	3	6	1
1383	1	3	0	4	3	0	3	3	0	0	2	3	3	2	1	0	0	20	0	1	1	3	3	3	3	6	1
1384	0	1	0	1	1	0	2	2	1	0	2	2	2	2	0	0	0	20	0	1	0	2	2	2	2	4	0
1385	0	4	0	2	0	0	3	2	0	0	2	3	2	2	0	0	0	20	0	1	0	3	2	3	2	5	0
1386	1	2	0	3	2	0	2	3	1	1	2	3	1	2	1	0	0	20	0	1	1	2	3	3	1	4	1
1387	0	5	0	2	3	0	2	2	1	1	1	2	2	2	1	0	0	20	0	1	1	2	2	2	2	4	1
1388	0	5	0	4	3	0	2	2	1	1	1	2	2	2	1	0	0	20	0	1	1	2	2	2	2	4	1
1389	0	4	0	1	0	0	3	2	1	0	2	3	2	2	1	0	0	20	0	1	1	3	2	3	2	5	1
1390	0	4	0	2	3	1	2	1	1	1	1	2	2	2	0	1	0	20	0	1	1	2	1	2	2	4	1
1391	0	3	0	2	4	1	1	1	1	1	0	1	1	2	0	1	0	20	0	1	1	1	1	1	1	2	1
1392	0	3	0	2	4	1	1	1	1	1	0	1	1	2	0	1	0	20	0	1	1	1	1	1	1	2	1
1393	0	5	0	2	3	0	2	1	0	0	2	2	2	2	0	0	0	20	0	1	0	2	1	2	2	4	0
1394	0	3	0	3	0	1	3	3	1	1	1	3	3	2	0	0	0	20	1	1	0	3	3	3	3	6	1
1395	0	3	0	1	0	0	3	2	1	0	2	3	2	2	1	0	0	20	0	1	1	3	2	3	2	5	1
1396	0	1	0	1	3	0	2	2	0	1	1	2	2	2	1	0	0	20	0	1	1	2	2	2	2	4	1
1397	0	1	0	3	0	1	2	2	0	1	2	2	3	2	0	0	0	20	1	1	0	2	2	2	3	5	1
1398	0	5	0	4	3	0	2	2	1	1	1	2	2	2	1	0	0	20	0	1	1	2	2	2	2	4	1
1399	1	1	0	2	1	0	2	2	0	0	2	2	2	2	0	0	0	20	0	1	0	2	2	2	2	4	0
1480	1	2	0	2	0	1	3	2	0	0	2	2	2	1	1	0	0	20	0	0	1	3	2	2	2	4	1
1481	0	1	0	1	3	0	2	2	1	1	2	2	2	1	1	0	0	20	0	0	1	2	2	2	2	4	1
1482	0	3	0	2	2	0	2	2	0	0	2	2	2	1	0	0	0	20	0	0	0	2	2	2	2	4	0
1483	1	1	0	1	3	0	2	2	0	1	1	2	2	1	1	0	0	20	0	0	1	2	2	2	2	4	1
1484	1	2	0	3	0	0	3	2	0	0	2	3	3	1	0	0	0	20	0	0	0	3	2	3	3	6	0
1485	1	4	0	1	1	1		2	1	1	1	3	3	1	0	0	1	20	0	0	1		2	3	3	6	1
1486	1	2	0	2	1	1	1	2	1	1	1	2	2	1	0	0	1	20	0	0	1	1	2	2	2	4	1
1487	1	1	0	3	0	0	3	3	0	0	2	3	3	1	0	0	0	20	0	0	0	3	3	3	3	6	0
1488	1	1	0	4	2	0	3	2	0	0	2	3	2	1	0	0	0	20	0	0	0	3	2	3	2	5	0
1489	0	4	0	2	3	0	3	1	1	1	1	3	2	1	0	0	1	20	0	0	1	3	1	3	2	5	1
1490	0	4	0	1	0	1	2	1	0	1	1	2	2	1	0	0	0	20	0	0	0	2	1	2	2	4	0
1491	0	1	0	2	1	1	2	2	0	1	0	2	2	1	1	0	0	20	0	0	1	2	2	2	2	4	1
1492	0	5	0	2	1	0	3	2	1	0	2	3	3	1	0	0	0	20	0	0	0	3	2	3	3	6	0
1493	0	3	0	3	0	0	4	2	1	1	2	4	2	1	1	0	0	20	0	0	1	3	2	3	2	5	1
1494	1	3	0	4	0	0	3	3	0	0	2	3	3	1	0	0	0	20	0	0	0	3	3	3	3	6	0
1495	0	1	0	4	4	0	4	4	0	0	2	3	3	1	1	0	0	20	0	0	1	3	3	3	3	6	1
1496	1	1	0	3	0	0	3	3	0	0	2	3	3	1	0	0	0	20	0	0	0	3	3	3	3	6	0
1497	1	1	0	3	2	0	3	2	0	0	2	3	3	1	0	0	0	20	0	0	0	3	2	3	3	6	0
1498	1	3	0	3	4	0	3	3	0	0	2	3	2	1	0	0	0	20	0	0	0	3	3	3	2	5	0
1499	0	2	0	3	0	1	2	1	0	1	2	2	2	1	0	0	0	20	1	0	0	2	1	2	2	4	1
1500	1	5	0	3	1	0	3	3	1	1	2	3	2	1	0	0	0	20	0	0	0	3	3	3	2	5	0
1501	1	3	0	3	2	0	3	3	0	0	2	3	3	1	0	0	0	20	0	0	0	3	3	3	3	6	0
1502	1	4	0	2	2	0	1	2	0	0	2	2	2	1	0	0	0	20	0	0	0	1	2	2	2	4	0
1503	1	2	0	3	3	0	3	2	0	1	2	2	2	1	0	0	0	20	0	0	0	3	2	2	2	4	0
1504	1	2	0	3	0	0	3	2	1	0	2	3	3	1	0	0	0	20	0	0	0	3	2	3	3	6	0
1505	0	4	0	2	0	0		1	0	1	2	3	3	1	0	0	1	20	0	0	1		1	3	3	6	1
1506	0	5	0	1	4	0	3	3	0	0	2	3	3	1	0	0	0	20	0	0	0	3	3	3	3	6	0
1507	1	1	0	4	0	0	3	4	0	0	2	3	3	1	0	0	0	20	0	0	0	3	3	3	3	6	0
1508	0	1	0	4	3	0	3	2	0	0	2	2	2	1	0	0	0	20	0	0	0	3	2	2	2	4	0
1509	0	5	0	2	0	1	3	2	1	1	1	2	2	1	1	0	0	20	0	0	1	3	2	2	2	4	1
1510	1	3	0	2	2	0		2	0	0	2	3	3	1	0	0	0	20	0	0	0		2	3	3	6	0
1511	1	2	0	4	0	0	3	3	0	0	2	3	3	1	0	0	0	20	0	0	0	3	3	3	3	6	0
1512	1	3	0	1	4	0	1	2	1	1	1	1	2	1	0	1	0	20	0	0	1	1	2	1	2	3	1
1513	1	2	0	2	0	1	3	2	0	0	2	2	2	1	1	0	0	20	0	0	1	3	2	2	2	4	1
1514	1	1	0	2	2	0	2	2	0	0	2	2	2	1	0	0	0	20	0	0	0	2	2	2	2	4	0
1515	1	4	0	3	2	0	3	2	0	0	2	3	2	1	0	0	0	20	0	0	0	3	2	3	2	5	0
1516	0	3	0	2	3	1	3	3	1	1	2	3	3	1	1	0	0	20	0	0	1	3	3	3	3	6	1
1517	1	2	0	4	0	0	3	3	0	0	2	3	3	1	0	0	0	20	0	0	0	3	3	3	3	6	0
1518	0	1	0	3	3	0	3	3	1	0	2	3	3	1	1	0	0	20	0	0	1	3	3	3	3	6	1
1519	1	1	0	2	2	0	2	2	0	0	2	2	2	1	0	0	0	20	0	0	0	2	2	2	2	4	0
1520	0	5	0	1	0	1	2	1	0	0	2	2	2	1	0	0	0	20	0	0	0	2	1	2	2	4	0
1521	0	2	0	3	3	1	2	3	1	1	2	3	3	1	1	0	0	20	0	0	1	2	3	3	3	6	1
1522	0	1	0	1	3	0	2	2	1	1	2	2	2	1	1	0	0	20	0	0	1	2	2	2	2	4	1
1523	1	2	0	3	0	0	3	2	0	0	2	2	2	1	0	0	0	20	0	0	0	3	2	2	2	4	0
1524	0	3	0	2	3	1	2	2	1	1	1	2	2	1	0	0	1	20	0	0	1	2	2	2	2	4	1
1525	0	1	0	3	4	0	3	3	0	1	2	3	3	1	0	0	0	20	0	0	0	3	3	3	3	6	0
1526	1	4	0	1	2	0	2	1	0	0	2	2	2	1	0	0	0	20	0	0	0	2	1	2	2	4	0
1527	0	5	0	2	4	0	3	2	0	0	2	2	2	1	0	0	0	20	0	0	0	3	2	2	2	4	0
1528	0	1	0	2	0	1	2	2	1	1	1	2	2	1	0	0	1	20	0	0	1	2	2	2	2	4	1
1529	1	5	0	4	1	0	3	3	1	1	2	3	3	1	0	0	0	20	0	0	0	3	3	3	3	6	0
1530	0	3	0	3	4	1	3	3	1	1	0	3	2	1	0	1	0	20	0	0	1	3	3	3	2	5	1
1531	0	2	0	3	3	0	3	2	1	0	2	3	3	1	1	0	0	20	0	0	1	3	2	3	3	6	1
1532	1	4	0	1	1	1		2	1	1	1	3	3	1	0	0	1	20	0	0	1		2	3	3	6	1
1533	0	2	0	3	1	0	3	2	0	1	2	2	2	1	0	0	0	20	0	0	0	3	2	2	2	4	0
1534	1	4	0	2	0	0	2	1	0	1	2	2	1	1	0	0	0	20	0	0	0	2	1	2	1	3	0
1535	0	5	0	2	0	1	2	1	1	0	1	1	2	1	0	0	0	20	0	0	0	2	1	1	2	3	0
1536	1	5	0	3	1	0	3	3	1	1	2	3	3	1	0	0	0	20	0	0	0	3	3	3	3	6	0
1537	1	1	0	3	2	0	3	2	0	0	2	3	3	1	0	0	0	20	0	0	0	3	2	3	3	6	0
1538	1	2	0	3	0	0	3	3	0	0	2	3	3	1	0	0	0	20	0	0	0	3	3	3	3	6	0
1539	1	2	0	4	2	0	3	3	0	0	2	3	3	1	0	0	0	20	0	0	0	3	3	3	3	6	0
1540	1	3	0	2	3	0	2	2	0	0	2	2	2	1	0	0	0	20	0	0	0	2	2	2	2	4	0
1541	0	4	0	1	0	1	2	1	0	1	1	2	2	1	0	0	0	20	0	0	0	2	1	2	2	4	0
1542	0	3	0	4	0	1	3	3	0	1	2	3	3	1	1	0	0	20	0	0	1	3	3	3	3	6	1
1543	0	4	0	2	3	1		1	1	1	1	3	3	1	0	0	1	20	0	0	1		1	3	3	6	1
1544	0	1	0	4	0	0	3	2	0	0	2	2	2	1	0	0	0	20	0	0	0	3	2	2	2	4	0
1545	1	3	0	2	3	0		2	0	1	2	3	3	1	0	0	0	20	0	0	0		2	3	3	6	0
1546	1	1	0	3	0	0	3	2	0	1	2	3	3	1	0	0	0	20	0	0	0	3	2	3	3	6	0
1547	0	5	0	1	1	0	3	3	1	0	2	3	3	1	0	0	0	20	0	0	0	3	3	3	3	6	0
1548	1	5	0	3	1	0	3	2	1	1	2	3	3	1	0	0	0	20	0	0	0	3	2	3	3	6	0
1549	0	5	0	2	0	1	3	2	0	0	1	2	2	1	0	0	0	20	0	0	0	3	2	2	2	4	0
1550	1	2	0	3	0	0	3	2	0	0	2	2	2	1	0	0	0	20	0	0	0	3	2	2	2	4	0
1551	0	2	0	2	0	1	3	2	1	1	1	3	3	1	0	0	1	20	0	0	1	3	2	3	3	6	1
1552	0	1	0	2	3	1	2	2	1	1	2	3	3	1	1	0	0	20	0	0	1	2	2	3	3	6	1
1553	1	1	0	2	4	1	2	2	1	1	1	2	1	1	0	1	0	20	0	0	1	2	2	2	1	3	1
1554	0	4	0	3	1	0	3	1	0	0	2	3	2	1	0	0	0	20	0	0	0	3	1	3	2	5	0
1555	0	2	0	2	1	1	3	3	0	1	1	3	2	1	0	0	1	20	0	0	1	3	3	3	2	5	1
1556	0	5	0	2	4	0	3	2	0	0	2	2	2	1	0	0	0	20	0	0	0	3	2	2	2	4	0
1557	0	5	0	1	1	0	3	3	1	0	2	3	3	1	0	0	0	20	0	0	0	3	3	3	3	6	0
1558	1	1	0	3	0	0	3	2	0	0	2	2	2	1	0	0	0	20	0	0	0	3	2	2	2	4	0
1559	0	4	0	2	3	1	2	1	1	1	1	2	2	1	0	1	0	20	0	0	1	2	1	2	2	4	1
1560	1	5	0	3	0	1	3	2	1	1	2	3	3	1	0	0	0	20	0	0	0	3	2	3	3	6	0
1561	0	2	0	1	3	0	2	2	1	0	2	2	2	1	0	0	0	20	0	0	0	2	2	2	2	4	0
1562	0	1	0	3	3	0	3	3	1	0	2	3	3	1	1	0	0	20	0	0	1	3	3	3	3	6	1
1563	0	4	0	1	3	0		2	1	0	1	3	3	1	1	0	0	20	0	0	1		2	3	3	6	1
1564	0	4	0	3	3	1		1	1	1	2	3	3	1	1	0	0	20	0	0	1		1	3	3	6	1
1565	0	2	0	1	3	1	3	2	0	1	1	3	2	1	0	0	1	20	0	0	1	3	2	3	2	5	1
1566	0	4	0	2	3	1		1	1	1	1	3	3	1	0	0	1	20	0	0	1		1	3	3	6	1
1567	0	4	0	2	0	1		1	1	1	1	3	3	1	0	0	1	20	0	0	1		1	3	3	6	1
1568	1	1	0	4	2	0	3	2	0	1	2	2	2	1	0	0	0	20	0	0	0	3	2	2	2	4	0
1569	0	5	0	2	0	1	3	2	1	0	1	2	2	1	0	0	0	20	0	0	0	3	2	2	2	4	0
1570	1	1	0	3	2	0	3	2	1	1	2	3	3	1	0	0	0	20	0	0	0	3	2	3	3	6	0
1571	1	5	0	3	1	0	3	3	1	1	2	3	2	1	0	0	0	20	0	0	0	3	3	3	2	5	0
1572	1	3	0	1	1	1	1	2	1	1	1	1	2	1	0	0	1	20	0	0	1	1	2	1	2	3	1
1573	0	2	0	3	1	0	3	2	0	1	2	2	2	1	0	0	0	20	0	0	0	3	2	2	2	4	0
1574	1	3	0	2	1	1	2	2	0	1	1	2	2	1	0	0	1	20	0	0	1	2	2	2	2	4	1
1575	0	2	0	1	3	0	2	2	1	0	2	2	2	1	0	0	0	20	0	0	0	2	2	2	2	4	0
1576	0	5	0	1	3	1	2	1	0	1	1	2	2	1	0	0	1	20	0	0	1	2	1	2	2	4	1
1577	0	2	0	3	3	1	2	2	1	1	2	3	3	1	1	0	0	20	0	0	1	2	2	3	3	6	1
1578	0	5	0	4	1	0	3	3	1	1	2	3	3	1	0	0	0	20	0	0	0	3	3	3	3	6	0
1579	0	2	0	1	3	0	1	2	1	1	1	2	2	1	1	0	0	20	0	0	1	1	2	2	2	4	1
1580	0	4	0	1	0	1	3	1	1	1	1	3	3	1	0	0	0	20	1	0	0	3	1	3	3	6	1
1581	0	1	0	3	1	1	3	2	1	1	1	3	3	1	0	0	1	20	0	0	1	3	2	3	3	6	1
1582	1	5	0	2	3	0	2	1	0	0	2	2	2	1	0	0	0	20	0	0	0	2	1	2	2	4	0
1583	0	5	0	2	3	0	2	1	0	0	2	2	2	1	0	0	0	20	0	0	0	2	1	2	2	4	0
1584	1	1	0	4	2	0	3	2	1	0	2	2	2	1	0	0	0	20	0	0	0	3	2	2	2	4	0
1585	0	1	0	3	2	0	3	2	0	0	2	3	3	1	0	0	0	20	0	0	0	3	2	3	3	6	0
1586	0	2	0	4	0	0	3	3	0	0	2	3	3	1	0	0	0	20	0	0	0	3	3	3	3	6	0
1587	1	5	0	2	1	0	2	1	1	0	2	2	2	1	0	0	0	20	0	0	0	2	1	2	2	4	0
1588	0	2	0	2	1	1	3	2	0	1	1	3	2	1	0	0	1	20	0	0	1	3	2	3	2	5	1
1589	1	5	0	2	3	0	2	1	0	0	2	2	2	1	0	0	0	20	0	0	0	2	1	2	2	4	0
1590	0	1	0	4	1	0	3	3	0	0	2	3	3	1	0	0	0	20	0	0	0	3	3	3	3	6	0
1591	0	4	0	1	3	0		1	1	0	1	3	3	1	1	0	0	20	0	0	1		1	3	3	6	1
1592	0	2	0	1	0	0	1	2	0	1	2	2	2	1	1	0	0	20	0	0	1	1	2	2	2	4	1
1593	1	5	0	2	1	0	3	2	1	0	2	2	2	1	0	0	0	20	0	0	0	3	2	2	2	4	0
1594	1	3	0	3	1	0	3	3	0	0	2	3	2	1	0	0	0	20	0	0	0	3	3	3	2	5	0
1595	1	2	0	3	0	0	3	2	0	0	2	2	2	1	0	0	0	20	0	0	0	3	2	2	2	4	0
1596	1	5	0	3	1	0	3	3	1	1	2	3	2	1	0	0	0	20	0	0	0	3	3	3	2	5	0
1597	1	4	0	2	2	0	1	2	0	0	2	2	2	1	0	0	0	20	0	0	0	1	2	2	2	4	0
1598	0	4	0	3	4	0	2	1	1	0	1	2	1	1	0	1	0	20	0	0	1	2	1	2	1	3	1
1599	0	4	0	4	0	0	2	1	1	1	1	2	2	1	0	0	1	20	0	0	1	2	1	2	2	4	1
1600	0	4	0	3	2	0	3	2	0	0	2	3	2	1	0	0	0	20	0	0	0	3	2	3	2	5	0
1601	1	1	0	4	2	0	3	2	0	0	2	3	2	1	0	0	0	20	0	0	0	3	2	3	2	5	0
1602	1	3	0	2	0	0	2	1	0	0	2	2	2	1	0	0	0	20	0	0	0	2	1	2	2	4	0
1603	0	1	0	3	3	0	3	3	1	0	2	3	3	1	1	0	0	20	0	0	1	3	3	3	3	6	1
1604	0	5	0	2	0	1	3	2	1	1	1	3	2	1	1	0	0	20	0	0	1	3	2	3	2	5	1
1605	1	3	0	2	2	0	2	1	1	0	2	2	1	1	1	0	0	20	0	0	1	2	1	2	1	3	1
1606	0	5	0	2	0	1	3	2	1	1	1	2	2	1	1	0	0	20	0	0	1	3	2	2	2	4	1
1607	1	1	0	3	0	0	3	3	0	1	2	3	3	1	0	0	0	20	0	0	0	3	3	3	3	6	0
1608	0	4	0	1	0	0	2	1	0	0	2	2	1	1	0	0	0	20	0	0	0	2	1	2	1	3	0
1609	1	4	0	2	0	0	2	1	0	1	2	2	1	1	0	0	0	20	0	0	0	2	1	2	1	3	0
1610	1	3	0	3	2	0	3	3	1	0	2	3	3	1	0	0	0	20	0	0	0	3	3	3	3	6	0
1611	0	2	0	2	0	1	3	2	0	0	2	2	2	1	1	0	0	20	0	0	1	3	2	2	2	4	1
1612	0	1	0	1	3	0	3	1	1	1	2	3	3	1	1	0	0	20	0	0	1	3	1	3	3	6	1
1613	0	5	0	3	1	0	3	2	1	1	2	3	3	1	0	0	0	20	0	0	0	3	2	3	3	6	0
1614	1	3	0	2	2	0		2	1	1	2	3	3	1	0	0	1	20	0	0	1		2	3	3	6	1
1615	1	5	0	3	1	0	3	2	1	1	2	3	3	1	0	0	0	20	0	0	0	3	2	3	3	6	0
1616	0	3	0	3	0	1	3	3	1	0	2	3	3	1	0	0	0	20	0	0	0	3	3	3	3	6	0
1617	0	1	0	3	2	0	3	2	0	0	2	3	3	1	0	0	0	20	0	0	0	3	2	3	3	6	0
1618	0	2	0	1	3	1	3	2	0	1	1	3	2	1	0	0	1	20	0	0	1	3	2	3	2	5	1
1619	0	1	0	1	0	0	3	2	1	1	2	3	3	1	0	0	1	20	0	0	1	3	2	3	3	6	1
1620	0	5	0	3	0	1	2	1	0	1	2	1	2	1	0	0	0	20	1	0	0	2	1	1	2	3	1
1621	0	4	0	3	2	0	3	2	0	0	2	3	2	1	0	0	0	20	0	0	0	3	2	3	2	5	0
1622	0	4	0	2	0	1		1	1	1	1	3	3	1	0	0	1	20	0	0	1		1	3	3	6	1
1623	0	4	0	1	3	0		2	0	1	2	3	3	1	0	0	1	20	0	0	1		2	3	3	6	1
1624	0	1	0	2	4	0	2	2	0	0	2	2	2	1	0	0	1	20	0	0	1	2	2	2	2	4	1
1625	0	2	0	2	0	1	4	2	1	1	1	3	2	1	0	0	1	20	0	0	1	3	2	3	2	5	1
1626	0	1	0	4	0	0	3	2	0	0	2	2	2	1	0	0	0	20	0	0	0	3	2	2	2	4	0
1627	1	2	0	1	4	0	2	2	1	1	1	2	1	1	0	1	0	20	0	0	1	2	2	2	1	3	1
1628	1	4	0	1	1	0	2	1	0	1	2	2	2	1	0	0	0	20	0	0	0	2	1	2	2	4	0
1629	1	1	0	3	1	0	3	3	0	1	2	3	3	1	0	0	0	20	0	0	0	3	3	3	3	6	0
1630	0	1	0	4	0	0	3	2	0	0	2	2	2	1	0	0	0	20	0	0	0	3	2	2	2	4	0
1631	0	1	0	3	3	0	3	2	1	0	2	3	3	1	0	0	0	20	0	0	0	3	2	3	3	6	0
1632	1	1	0	1	1	1	2	2	0	1	1	2	2	1	0	0	1	20	0	0	1	2	2	2	2	4	1
1633	1	2	0	3	0	0	3	2	0	0	2	2	2	1	0	0	0	20	0	0	0	3	2	2	2	4	0
1634	1	1	0	3	0	0	3	1	0	0	2	3	3	1	0	0	0	20	0	0	0	3	1	3	3	6	0
1635	1	3	0	3	0	0	3	3	0	0	2	3	3	1	0	0	0	20	0	0	0	3	3	3	3	6	0
1636	0	3	0	2	0	0	3	1	1	0	1	3	2	1	0	0	1	20	0	0	1	3	1	3	2	5	1
1637	1	1	0	3	0	0	3	2	0	0	2	2	2	1	0	0	0	20	0	0	0	3	2	2	2	4	0
1638	1	3	0	3	2	0	3	3	0	0	2	3	2	1	0	0	0	20	0	0	0	3	3	3	2	5	0
1639	1	3	0	1	2	1	1	2	1	1	1	1	2	1	0	0	1	20	0	0	1	1	2	1	2	3	1
1640	1	4	0	1	0	1	2	1	0	0	2	3	2	1	0	0	0	20	0	0	0	2	1	3	2	5	0
1641	1	5	0	2	4	0	3	3	0	0	2	3	2	1	0	0	0	20	0	0	0	3	3	3	2	5	0
1642	0	4	0	2	3	1		1	1	1	1	3	3	1	0	0	1	20	0	0	1		1	3	3	6	1
1643	0	3	0	3	0	1	3	3	0	0	2	3	3	1	1	0	0	20	0	0	1	3	3	3	3	6	1
1644	1	4	0	1	1	1		2	1	1	1	3	3	1	0	0	1	20	0	0	1		2	3	3	6	1
1645	1	2	0	3	2	1	3	3	0	1	2	2	2	1	0	0	0	20	0	0	0	3	3	2	2	4	0
1646	1	5	0	2	4	0	3	2	0	0	2	2	2	1	0	0	0	20	0	0	0	3	2	2	2	4	0
1647	0	4	0	1	0	0	3	2	0	0	2	2	1	1	0	0	0	20	0	0	0	3	2	2	1	3	0
1648	1	2	0	3	1	1	3	2	0	1	2	2	2	1	0	0	0	20	0	0	0	3	2	2	2	4	0
1649	1	1	0	3	0	0	3	2	1	0	2	3	3	1	0	0	0	20	0	0	0	3	2	3	3	6	0
1650	1	5	0	2	4	0	3	2	0	0	2	2	2	1	0	0	0	20	0	0	0	3	2	2	2	4	0
1651	1	1	0	4	1	0	3	2	0	0	2	2	2	1	0	0	0	20	0	0	0	3	2	2	2	4	0
1652	0	4	0	1	0	0		2	0	1	2	3	3	1	0	0	1	20	0	0	1		2	3	3	6	1
1653	1	4	0	2	2	0		1	0	1	2	3	3	1	0	0	1	20	0	0	1		1	3	3	6	1
1654	0	3	0	2	0	0	3	1	1	0	1	3	2	1	0	0	1	20	0	0	1	3	1	3	2	5	1
1655	0	4	0	2	0	1		1	1	1	1	3	3	1	0	0	1	20	0	0	1		1	3	3	6	1
1656	0	4	0	2	0	1		1	1	1	1	3	3	1	0	0	1	20	0	0	1		1	3	3	6	1
1657	0	4	0	3	0	1	2	1	0	1	2	2	2	1	0	0	0	20	1	0	0	2	1	2	2	4	1
1658	0	1	0	3	0	0	3	1	0	1	2	3	3	1	0	0	0	20	0	0	0	3	1	3	3	6	0
1659	0	5	0	1	3	1	2	1	0	1	1	2	2	1	0	0	1	20	0	0	1	2	1	2	2	4	1
1660	1	1	0	2	2	0	2	2	0	0	2	2	2	1	0	0	0	20	0	0	0	2	2	2	2	4	0
1661	0	3	0	2	1	1	2	1	0	1	1	2	1	1	0	0	1	20	0	0	1	2	1	2	1	3	1
1662	0	1	0	2	4	0	2	2	0	0	2	2	2	1	0	0	1	20	0	0	1	2	2	2	2	4	1
1663	0	5	0	1	3	1	2	1	0	1	1	2	2	1	0	0	1	20	0	0	1	2	1	2	2	4	1
1664	1	1	0	2	2	0	2	2	0	0	2	2	2	1	0	0	0	20	0	0	0	2	2	2	2	4	0
1665	0	4	0	1	0	0	2	1	0	0	2	2	1	1	0	0	0	20	0	0	0	2	1	2	1	3	0
1666	1	4	0	2	0	0	2	1	0	1	2	2	1	1	0	0	0	20	0	0	0	2	1	2	1	3	0
1667	1	1	0	4	2	0	3	2	0	0	2	3	2	1	0	0	0	20	0	0	0	3	2	3	2	5	0
1668	0	2	0	3	3	0	3	3	1	1	1	3	3	1	1	0	0	20	0	0	1	3	3	3	3	6	1
1669	0	1	0	1	3	0	2	2	1	0	1	2	2	1	1	0	0	20	0	0	1	2	2	2	2	4	1
1670	1	3	0	1	3	0	1	2	0	1	2	2	2	1	0	0	1	20	3	0	1	1	2	2	2	4	4
1671	0	5	0	2	0	1	3	2	1	1	1	2	2	1	0	0	0	20	0	0	0	3	2	2	2	4	0
1672	1	1	0	3	0	0	3	2	0	0	2	2	2	1	0	0	0	20	0	0	0	3	2	2	2	4	0
1673	0	5	0	1	3	1	2	1	0	1	1	2	2	1	0	0	1	20	0	0	1	2	1	2	2	4	1
1674	1	2	0	4	2	0	3	3	0	0	2	3	3	1	0	0	0	20	0	0	0	3	3	3	3	6	0
1675	0	3	0	2	3	1	3	2	1	1	1	3	3	1	0	0	1	20	0	0	1	3	2	3	3	6	1
1676	1	2	0	3	0	0	3	3	0	0	2	3	3	1	0	0	0	20	0	0	0	3	3	3	3	6	0
1677	1	2	0	4	0	0	3	3	0	0	2	3	3	1	0	0	0	20	0	0	0	3	3	3	3	6	0
1678	0	3	0	2	0	1	3	3	1	1	2	3	3	1	1	0	0	20	0	0	1	3	3	3	3	6	1
1679	1	3	0	2	0	0	1	2	0	0	2	1	2	1	0	0	0	20	0	0	0	1	2	1	2	3	0
1680	1	3	0	3	2	0	3	3	0	0	2	3	3	1	0	0	0	20	0	0	0	3	3	3	3	6	0
1681	1	2	0	2	1	1	1	2	1	1	1	2	2	1	0	0	1	20	0	0	1	1	2	2	2	4	1
1682	1	3	0	2	0	0	1	2	0	0	2	1	2	1	0	0	0	20	0	0	0	1	2	1	2	3	0
1683	1	5	0	2	4	0	3	2	0	0	2	2	2	1	0	0	0	20	0	0	0	3	2	2	2	4	0
1684	0	1	0	3	0	0	3	3	0	0	2	3	3	1	1	0	0	20	0	0	1	3	3	3	3	6	1
1685	1	3	0	3	2	0	3	3	0	0	2	3	2	1	0	0	0	20	0	0	0	3	3	3	2	5	0
1686	1	2	0	3	0	0	3	2	0	0	2	2	2	1	0	0	0	20	0	0	0	3	2	2	2	4	0
1687	0	5	0	2	1	0	3	2	1	0	2	3	3	1	0	0	0	20	0	0	0	3	2	3	3	6	0
1688	0	2	0	3	4	0	2	2	0	0	2	2	2	1	0	0	1	20	0	0	1	2	2	2	2	4	1
1689	0	2	0	3	3	1	2	2	1	1	2	3	3	1	1	0	0	20	0	0	1	2	2	3	3	6	1
1690	0	5	0	1	3	1	2	1	0	1	1	2	2	1	0	0	1	20	0	0	1	2	1	2	2	4	1
1691	0	4	0	2	3	1	2	1	1	1	1	2	2	1	0	1	0	20	0	0	1	2	1	2	2	4	1
1692	0	2	0	2	1	1	3	2	0	1	1	3	2	1	0	0	1	20	0	0	1	3	2	3	2	5	1
1693	1	2	0	3	2	0	3	2	0	1	2	2	2	1	0	0	0	20	0	0	0	3	2	2	2	4	0
1694	1	1	0	4	0	0	3	4	0	0	2	3	3	1	0	0	0	20	0	0	0	3	3	3	3	6	0
1695	0	5	0	1	0	1	2	1	0	0	2	2	2	1	0	0	0	20	0	0	0	2	1	2	2	4	0
1696	0	5	0	3	3	0	1	1	1	0	1	1	2	1	1	0	0	20	0	0	1	1	1	1	2	3	1
1697	1	4	0	1	2	1		2	1	1	1	3	3	1	0	0	1	20	0	0	1		2	3	3	6	1
1698	0	4	0	3	3	0		1	0	1	2	3	3	1	0	0	0	20	0	0	0		1	3	3	6	0
1699	1	4	0	2	1	0	2	1	0	0	2	2	1	1	0	0	0	20	0	0	0	2	1	2	1	3	0
1700	1	3	0	2	3	0	2	1	0	1	2	2	2	1	0	0	0	20	0	0	0	2	1	2	2	4	0
1701	0	4	0	3	1	0	3	2	0	0	2	3	2	1	0	0	0	20	0	0	0	3	2	3	2	5	0
1702	0	5	0	2	0	1	2	1	0	0	1	1	2	1	0	0	0	20	0	0	0	2	1	1	2	3	0
1703	0	2	0	3	3	0	2	1	0	1	2	2	2	1	0	0	1	20	0	0	1	2	1	2	2	4	1
1704	0	5	0	3	1	0	3	2	1	1	2	3	3	1	0	0	0	20	0	0	0	3	2	3	3	6	0
1705	0	1	0	2	1	0	2	2	0	0	2	2	2	1	0	0	0	20	0	0	0	2	2	2	2	4	0
1706	0	2	0	2	0	1	3	2	0	0	2	2	2	1	1	0	0	20	0	0	1	3	2	2	2	4	1
1707	0	5	0	2	0	1	3	2	0	1	1	2	2	1	0	0	0	20	0	0	0	3	2	2	2	4	0
1708	1	1	0	4	2	0	3	2	1	0	2	2	2	1	0	0	0	20	0	0	0	3	2	2	2	4	0
1709	0	1	0	3	0	0	3	3	0	1	2	3	3	1	0	0	0	20	0	0	0	3	3	3	3	6	0
1710	1	2	0	3	0	0	3	2	0	0	2	2	2	1	0	0	0	20	0	0	0	3	2	2	2	4	0
1711	1	5	0	2	3	0	3	2	0	0	2	2	2	1	0	0	0	20	0	0	0	3	2	2	2	4	0
1712	1	3	0	2	2	0		2	0	0	2	3	3	1	0	0	0	20	0	0	0		2	3	3	6	0
1713	0	1	0	3	0	0	3	1	0	1	2	3	3	1	0	0	0	20	0	0	0	3	1	3	3	6	0
1714	1	3	0	1	4	0	1	2	1	1	1	1	2	1	0	1	0	20	0	0	1	1	2	1	2	3	1
1715	0	1	0	3	0	0	3	3	0	0	2	3	3	1	1	0	0	20	0	0	1	3	3	3	3	6	1
1716	1	1	0	2	2	0	2	2	0	0	2	2	2	1	0	0	0	20	0	0	0	2	2	2	2	4	0
1717	0	5	0	1	3	1	2	1	0	1	1	2	2	1	0	0	1	20	0	0	1	2	1	2	2	4	1
1718	1	3	0	2	2	0	3	3	1	0	2	3	4	1	1	0	0	20	0	0	1	3	3	3	3	6	1
1719	0	5	0	3	3	0	3	2	1	0	1	3	2	1	1	0	0	20	0	0	1	3	2	3	2	5	1
1720	1	1	0	3	1	0	3	2	0	1	2	3	3	1	0	0	0	20	0	0	0	3	2	3	3	6	0
1721	0	1	0	1	0	0	2	2	0	1	2	2	2	1	0	0	0	20	0	0	0	2	2	2	2	4	0
1722	0	3	0	2	0	1		2	0	1	2	3	3	1	1	0	0	20	0	0	1		2	3	3	6	1
1723	1	2	0	4	0	0	3	3	0	0	2	3	3	1	0	0	0	20	0	0	0	3	3	3	3	6	0
1724	0	2	0	3	1	1	3	3	1	1	2	2	2	1	0	0	0	20	0	0	0	3	3	2	2	4	0
1725	0	1	0	3	0	1	3	1	0	1	2	3	3	1	0	0	0	20	0	0	0	3	1	3	3	6	0
1726	0	1	0	2	1	1	2	2	0	1	0	2	2	1	1	0	0	20	0	0	1	2	2	2	2	4	1
1727	0	1	0	2	3	0	2	2	0	0	2	3	3	1	1	0	0	20	0	0	1	2	2	3	3	6	1
1728	0	2	0	1	3	0	1	2	1	1	1	2	2	1	1	0	0	20	0	0	1	1	2	2	2	4	1
1729	0	1	0	3	4	0	2	1	1	1	2	3	2	1	1	0	0	20	0	0	1	2	1	3	2	5	1
1730	0	5	0	3	0	1	3	2	0	1	1	3	2	1	0	0	0	20	0	0	0	3	2	3	2	5	0
1731	0	2	0	1	3	0	1	2	1	0	1	2	2	1	0	1	0	20	0	0	1	1	2	2	2	4	1
1732	0	5	0	4	1	0	3	3	1	1	2	3	3	1	0	0	0	20	0	0	0	3	3	3	3	6	0
1733	0	4	0	3	1	0	3	1	0	0	2	3	3	1	1	0	0	20	0	0	1	3	1	3	3	6	1
1734	0	5	0	1	3	1	2	1	0	1	1	2	2	1	0	0	1	20	0	0	1	2	1	2	2	4	1
1735	0	5	0	2	0	1	3	2	0	1	1	2	2	1	0	0	0	20	0	0	0	3	2	2	2	4	0
1736	1	3	0	3	2	0	4	3	0	0	2	3	3	1	0	0	0	20	0	0	0	3	3	3	3	6	0
1737	0	5	0	2	0	1	3	2	1	1	1	2	2	1	1	0	0	20	0	0	1	3	2	2	2	4	1
1738	0	5	0	2	0	1	3	2	1	1	1	2	2	1	1	0	0	20	0	0	1	3	2	2	2	4	1
1739	0	2	0	3	1	1	3	3	0	1	2	2	2	1	0	0	0	20	0	0	0	3	3	2	2	4	0
1740	0	4	0	1	3	0		1	1	1	2	3	3	1	0	0	0	20	0	0	0		1	3	3	6	0
1741	0	5	0	2	0	1	2	1	1	0	1	1	2	1	0	0	0	20	0	0	0	2	1	1	2	3	0
1742	0	5	0	1	0	1	2	1	0	1	2	2	2	1	0	0	0	20	0	0	0	2	1	2	2	4	0
1743	0	5	0	1	1	0	3	3	1	0	2	3	3	1	0	0	0	20	0	0	0	3	3	3	3	6	0
1744	1	3	0	3	1	0	4	1	0	0	2	4	3	1	0	0	0	20	0	0	0	3	1	3	3	6	0
1745	0	5	0	1	4	0	3	3	0	0	2	3	3	1	0	0	0	20	0	0	0	3	3	3	3	6	0
1746	0	4	0	2	3	0		1	1	1	1	3	3	1	1	0	0	20	0	0	1		1	3	3	6	1
1747	0	4	0	3	0	0		2	0	0	2	3	3	1	0	0	0	20	0	0	0		2	3	3	6	0
1748	0	2	0	3	3	0	3	2	1	0	2	3	3	1	1	0	0	20	0	0	1	3	2	3	3	6	1
1749	0	1	0	4	0	0	3	2	0	0	2	2	2	1	0	0	0	20	0	0	0	3	2	2	2	4	0
1750	0	2	0	2	3	0	2	2	0	1	2	2	2	1	0	0	1	20	0	0	1	2	2	2	2	4	1
1751	0	4	0	1	3	0		1	1	0	1	3	3	1	1	0	0	20	0	0	1		1	3	3	6	1
1752	1	4	0	2	4	0		2	1	0	1	3	3	1	0	1	0	19	0	0	1		2	3	3	6	1
1753	0	3	0	1	0	0	4	2	1	0	2	3	2	1	1	0	0	20	0	0	1	3	2	3	2	5	1
1754	1	2	0	4	0	0	3	3	0	0	2	3	3	1	0	0	0	20	0	0	0	3	3	3	3	6	0
1755	1	2	0	4	0	0	3	3	0	0	2	3	3	1	0	0	0	20	0	0	0	3	3	3	3	6	0
1756	0	2	0	3	1	0	3	2	0	1	2	2	2	1	0	0	0	20	0	0	0	3	2	2	2	4	0
1757	0	3	0	1	3	0	1	2	1	0	1	1	2	1	1	0	0	20	0	0	1	1	2	1	2	3	1
1758	1	1	0	3	0	0	3	3	1	1	2	4	3	1	1	0	0	20	0	0	1	3	3	3	3	6	1
1759	0	3	0	3	0	1	2	3	0	1	1	3	3	1	0	0	0	20	0	0	0	2	3	3	3	6	0
1760	1	1	0	1	1	1	2	2	0	1	1	2	2	1	0	0	1	20	0	0	1	2	2	2	2	4	1
1761	0	5	0	2	3	0	3	2	1	1	1	2	2	1	1	0	0	20	0	0	1	3	2	2	2	4	1
1762	1	5	0	2	1	0	3	2	1	0	2	3	3	1	0	0	0	20	0	0	0	3	2	3	3	6	0
1763	0	5	0	3	3	0	1	1	1	0	1	1	2	1	1	0	0	20	0	0	1	1	1	1	2	3	1
1764	1	1	0	3	2	0	3	2	0	1	2	3	3	1	0	0	0	20	0	0	0	3	2	3	3	6	0
1765	0	1	0	2	3	1	2	2	1	1	2	3	3	1	1	0	0	20	0	0	1	2	2	3	3	6	1
1766	1	1	0	3	0	0	3	2	0	0	2	3	3	1	0	0	0	20	0	0	0	3	2	3	3	6	0
1767	0	1	0	2	3	1	2	2	1	1	2	3	3	1	1	0	0	20	0	0	1	2	2	3	3	6	1
1768	0	5	0	2	0	1	3	2	1	1	1	2	2	1	1	0	0	19	0	0	1	3	2	2	2	4	1
1769	0	5	0	2	0	1	3	2	0	1	1	2	2	1	0	0	0	20	0	0	0	3	2	2	2	4	0
1770	0	5	0	2	0	1	3	2	1	1	1	2	2	1	0	0	0	20	0	0	0	3	2	2	2	4	0
1771	1	4	0	2	2	0	1	2	0	0	2	2	2	1	0	0	0	20	0	0	0	1	2	2	2	4	0
1772	0	2	0	1	3	0	1	2	1	1	2	2	2	1	1	0	0	20	0	0	1	1	2	2	2	4	1
1773	1	1	0	4	2	0	3	2	0	0	2	3	2	1	0	0	0	20	0	0	0	3	2	3	2	5	0
1774	0	2	0	2	1	1	3	2	1	1	1	2	2	1	0	0	1	20	0	0	1	3	2	2	2	4	1
1775	0	4	0	1	0	1		2	1	1	1	3	3	1	0	0	1	20	0	0	1		2	3	3	6	1
1776	0	5	0	2	0	1	3	2	1	1	1	3	2	1	1	0	0	20	0	0	1	3	2	3	2	5	1
1777	0	2	0	3	0	1	3	3	0	1	2	2	2	1	0	0	0	20	1	0	0	3	3	2	2	4	1
1778	0	5	0	2	0	1	3	2	1	1	1	2	2	1	1	0	0	20	0	0	1	3	2	2	2	4	1
1779	0	1	0	3	3	0	3	3	1	0	2	3	3	1	1	0	0	20	0	0	1	3	3	3	3	6	1
1780	0	5	0	2	0	1	3	2	0	1	1	2	2	1	0	0	0	20	0	0	0	3	2	2	2	4	0
1781	0	5	0	3	0	1	3	2	0	1	1	3	3	1	0	0	0	20	0	0	0	3	2	3	3	6	0
1782	1	1	0	4	2	0	3	2	0	0	2	3	2	1	0	0	0	20	0	0	0	3	2	3	2	5	0
1783	1	3	0	1	4	0	3	2	1	1	1	2	1	1	0	1	0	20	0	0	1	3	2	2	1	3	1
1784	1	2	0	3	3	0	3	2	0	0	2	3	3	1	0	0	0	20	0	0	0	3	2	3	3	6	0
1785	0	3	0	2	0	0	3	3	0	0	2	3	3	1	1	0	0	20	0	0	1	3	3	3	3	6	1
1786	1	1	0	4	1	0	3	2	0	0	2	2	2	1	0	0	0	20	0	0	0	3	2	2	2	4	0
1787	0	5	0	2	0	1	3	2	1	1	1	2	2	1	1	0	0	20	0	0	1	3	2	2	2	4	1
1788	0	3	0	1	0	0	1	2	0	1	2	1	2	1	1	0	0	20	0	0	1	1	2	1	2	3	1
1789	0	1	0	3	3	0	3	3	1	0	2	3	3	1	1	0	0	20	0	0	1	3	3	3	3	6	1
1790	0	5	0	2	0	1	3	2	1	1	1	2	2	1	0	0	0	20	0	0	0	3	2	2	2	4	0
1791	0	5	0	2	0	1	2	1	0	0	2	2	2	1	0	0	0	20	0	0	0	2	1	2	2	4	0
1792	1	5	0	2	1	0	1	1	1	1	2	1	2	1	0	0	0	20	0	0	0	1	1	1	2	3	0
1793	0	3	0	1	0	0	1	2	0	1	2	1	2	1	1	0	0	20	0	0	1	1	2	1	2	3	1
1794	0	4	0	3	3	1		1	1	1	2	3	3	1	1	0	0	20	0	0	1		1	3	3	6	1
1795	1	2	0	3	0	0	3	2	0	0	2	2	2	1	0	0	0	20	0	0	0	3	2	2	2	4	0
1796	1	3	0	3	2	0	3	3	0	0	2	3	3	1	0	0	0	20	0	0	0	3	3	3	3	6	0
1797	1	1	0	2	2	0	2	2	0	0	2	2	2	1	0	0	0	20	0	0	0	2	2	2	2	4	0
1798	1	5	0	2	1	0	2	1	1	0	2	2	2	1	0	0	0	20	0	0	0	2	1	2	2	4	0
1799	0	2	0	3	1	1	2	1	1	1	1	2	3	1	0	0	1	20	0	0	1	2	1	2	3	5	1
1800	0	2	0	1	0	0	1	2	0	1	2	2	2	1	1	0	0	20	0	0	1	1	2	2	2	4	1
1801	1	1	0	3	0	0	3	3	0	0	2	2	2	1	0	0	0	20	0	0	0	3	3	2	2	4	0
1802	1	1	0	2	2	1	2	2	0	0	2	3	3	1	1	0	0	20	0	0	1	2	2	3	3	6	1
1803	1	5	0	2	1	0	3	2	1	1	2	2	2	1	0	0	0	20	0	0	0	3	2	2	2	4	0
1804	0	3	0	3	0	0	4	2	1	0	2	3	2	1	1	0	0	20	0	0	1	3	2	3	2	5	1
1805	0	4	0	1	0	0	1	3	1	1	2	2	3	1	0	0	0	20	0	0	0	1	3	2	3	5	0
1806	1	1	0	3	1	0	3	3	0	1	2	3	3	1	0	0	0	20	0	0	0	3	3	3	3	6	0
1807	0	1	0	1	3	0	3	2	1	0	2	3	3	1	0	0	0	20	0	0	0	3	2	3	3	6	0
1808	1	1	0	3	0	0	3	3	0	1	2	3	3	1	0	0	0	20	0	0	0	3	3	3	3	6	0
1809	1	1	0	3	2	0	3	2	0	0	2	3	3	1	0	0	0	20	0	0	0	3	2	3	3	6	0
1810	0	5	0	2	4	1	3	2	0	1	1	1	2	1	0	0	1	20	0	0	1	3	2	1	2	3	1
1811	1	5	0	4	1	0	1	1	1	1	2	1	2	1	0	0	0	20	0	0	0	1	1	1	2	3	0
1812	1	3	0	3	0	1	3	3	1	1	1	3	3	1	0	0	0	20	1	0	0	3	3	3	3	6	1
1813	1	2	0	3	0	0	3	2	0	0	2	2	2	1	0	0	0	20	0	0	0	3	2	2	2	4	0
1814	0	4	0	3	2	0	3	2	0	1	2	3	3	1	0	0	0	20	0	0	0	3	2	3	3	6	0
1815	0	2	0	3	3	1	2	2	1	1	2	3	3	1	1	0	0	20	0	0	1	2	2	3	3	6	1
1816	1	1	0	3	1	0	2	1	0	1	2	2	1	1	0	0	0	20	0	0	0	2	1	2	1	3	0
1817	1	1	0	3	0	0	3	2	0	0	2	3	3	1	0	0	0	20	0	0	0	3	2	3	3	6	0
1818	0	2	0	3	1	1	3	1	1	1	1	3	2	1	0	0	1	20	0	0	1	3	1	3	2	5	1
1819	0	4	0	2	0	1		1	1	1	1	3	3	1	0	0	1	20	0	0	1		1	3	3	6	1
1820	0	4	0	2	3	1	2	1	1	1	1	2	2	1	0	1	0	20	0	0	1	2	1	2	2	4	1
1821	1	2	0	3	2	0	2	1	1	1	2	2	2	1	1	0	0	20	0	0	1	2	1	2	2	4	1
1822	1	4	0	1	0	1	2	1	0	0	2	3	2	1	0	0	0	20	0	0	0	2	1	3	2	5	0
1823	1	3	0	2	2	0		2	0	0	2	3	3	1	0	0	0	20	0	0	0		2	3	3	6	0
1824	0	3	0	3	4	0	3	2	1	0	2	3	3	1	0	1	0	20	0	0	1	3	2	3	3	6	1
1825	0	4	0	3	3	1		1	1	1	2	3	3	1	1	0	0	20	0	0	1		1	3	3	6	1
1826	1	1	0	4	0	0	3	4	0	0	2	3	3	1	0	0	0	20	0	0	0	3	3	3	3	6	0
1827	1	1	0	4	0	0	3	2	0	0	2	2	2	1	0	0	0	20	0	0	0	3	2	2	2	4	0
1828	1	1	0	3	2	0	3	2	0	0	2	3	3	1	0	0	0	20	0	0	0	3	2	3	3	6	0
1829	1	4	0	1	0	1	2	1	0	0	2	3	2	1	0	0	0	20	0	0	0	2	1	3	2	5	0
1830	1	1	0	4	2	0	3	2	1	0	2	2	2	1	0	0	0	20	0	0	0	3	2	2	2	4	0
1831	1	1	0	4	0	0	3	3	0	0	2	3	3	1	0	0	0	20	0	0	0	3	3	3	3	6	0
1832	1	4	0	2	2	0	3	2	0	0	2	3	2	1	0	0	0	20	0	0	0	3	2	3	2	5	0
1833	0	3	0	4	0	1	4	3	0	1	2	3	3	1	1	0	0	20	0	0	1	3	3	3	3	6	1
1834	0	3	0	4	0	1	4	3	0	1	2	3	3	1	1	0	0	20	0	0	1	3	3	3	3	6	1
1835	1	1	0	1	0	0	2	2	1	0	1	2	2	1	0	0	1	20	0	0	1	2	2	2	2	4	1
1836	1	1	0	1	1	1	2	2	0	1	1	2	2	1	0	0	1	20	0	0	1	2	2	2	2	4	1
1837	1	3	0	4	0	0	3	3	0	0	2	3	3	1	0	0	0	20	0	0	0	3	3	3	3	6	0
1838	0	2	0	4	4	0	3	1	1	1	2	4	1	1	1	0	0	20	0	0	1	3	1	3	1	4	1
1839	1	2	0	3	2	0	3	2	0	0	2	2	2	1	0	0	0	20	0	0	0	3	2	2	2	4	0
1840	1	4	0	1	2	1	2	1	0	1	2	3	2	1	0	0	0	20	0	0	0	2	1	3	2	5	0
1841	0	2	0	1	3	0	1	2	1	1	1	2	2	1	1	0	0	20	0	0	1	1	2	2	2	4	1
1842	0	4	0	2	3	0		1	1	0	1	3	3	1	1	0	0	20	0	0	1		1	3	3	6	1
1843	1	5	0	1	1	0	3	3	1	0	2	3	3	1	0	0	0	20	0	0	0	3	3	3	3	6	0
1844	0	4	0	1	0	0	3	1	0	1	2	3	2	1	1	0	0	20	0	0	1	3	1	3	2	5	1
1845	1	4	0	2	4	0	2	1	0	1	2	2	2	1	0	0	0	20	0	0	0	2	1	2	2	4	0
1846	0	4	0	2	3	0		1	1	0	1	3	3	1	1	0	0	20	0	0	1		1	3	3	6	1
1847	0	4	0	3	1	0	3	2	0	0	2	3	2	1	0	0	0	20	0	0	0	3	2	3	2	5	0
1848	0	4	0	3	1	0	3	1	0	0	2	3	2	1	0	0	0	20	0	0	0	3	1	3	2	5	0
1849	1	2	0	4	0	0	3	3	0	0	2	3	3	1	0	0	0	20	0	0	0	3	3	3	3	6	0
1850	1	3	0	2	2	0		2	0	0	2	3	3	1	0	0	0	20	0	0	0		2	3	3	6	0
1851	0	3	0	2	4	0	3	2	0	0	2	3	2	1	0	0	1	20	0	0	1	3	2	3	2	5	1
1852	1	2	0	3	0	0	3	2	0	0	2	3	3	1	0	0	0	20	0	0	0	3	2	3	3	6	0
1853	0	2	0	2	0	1	3	2	1	1	1	3	2	1	0	0	1	20	0	0	1	3	2	3	2	5	1
1854	1	1	0	3	0	0	3	2	0	1	2	3	3	1	0	0	0	20	0	0	0	3	2	3	3	6	0
1855	0	4	0	1	3	0		2	0	1	2	3	3	1	0	0	1	20	0	0	1		2	3	3	6	1
1856	1	1	0	4	2	0	3	2	0	0	2	3	2	1	0	0	0	20	0	0	0	3	2	3	2	5	0
1857	1	1	0	3	2	0	3	2	0	0	2	3	3	1	0	0	0	20	0	0	0	3	2	3	3	6	0
1858	0	1	0	2	0	1	2	2	1	1	1	3	3	1	0	0	1	20	0	0	1	2	2	3	3	6	1
1859	0	4	0	2	3	1	2	1	1	1	1	2	2	1	0	1	0	20	0	0	1	2	1	2	2	4	1
1860	1	4	0	2	2	0	2	2	1	1	2	2	2	1	1	0	0	20	0	0	1	2	2	2	2	4	1
1861	1	1	0	1	0	0	2	2	1	0	1	2	2	1	0	0	1	20	0	0	1	2	2	2	2	4	1
1862	0	4	0	1	0	0		2	0	1	2	3	3	1	0	0	1	20	0	0	1		2	3	3	6	1
1863	0	2	0	3	3	0	3	2	0	1	2	3	3	1	0	0	0	20	0	0	0	3	2	3	3	6	0
1864	1	4	0	2	4	0	1	1	0	1	2	2	3	1	0	0	0	20	0	0	0	1	1	2	3	5	0
1865	0	1	0	1	3	0	2	2	1	0	2	2	2	1	0	0	0	20	0	0	0	2	2	2	2	4	0
1866	0	4	0	3	2	0	3	2	0	1	2	3	3	1	0	0	0	20	0	0	0	3	2	3	3	6	0
1867	1	2	0	4	0	0	3	3	0	0	2	3	3	1	0	0	0	20	0	0	0	3	3	3	3	6	0
1868	1	2	0	3	0	0	3	2	0	1	2	2	2	1	0	0	0	20	0	0	0	3	2	2	2	4	0
1869	1	4	0	2	4	0	2	2	0	0	2	2	1	1	0	0	0	20	0	0	0	2	2	2	1	3	0
1870	0	4	0	1	0	0		2	0	1	2	3	3	1	0	0	1	20	0	0	1		2	3	3	6	1
1871	0	3	0	1	0	0	1	2	0	1	2	1	2	1	1	0	0	20	0	0	1	1	2	1	2	3	1
1872	0	4	0	3	4	0	2	2	0	0	2	2	2	1	0	0	0	20	0	0	0	2	2	2	2	4	0
1873	1	5	0	2	1	0	1	1	1	0	2	1	2	1	0	0	0	20	0	0	0	1	1	1	2	3	0
1874	1	4	0	2	0	0	3	2	0	1	2	3	2	1	0	0	0	20	0	0	0	3	2	3	2	5	0
1875	0	2	0	3	4	0	2	2	0	0	2	2	2	1	0	0	1	20	0	0	1	2	2	2	2	4	1
1876	0	3	0	1	3	0	1	2	1	0	2	1	2	1	1	0	0	20	0	0	1	1	2	1	2	3	1
1877	0	2	0	3	0	0	3	2	0	0	2	2	2	1	0	0	0	20	0	0	0	3	2	2	2	4	0
1878	1	1	0	3	0	1	3	2	0	1	2	3	3	1	0	0	0	20	0	0	0	3	2	3	3	6	0
1879	0	4	0	3	3	0		1	0	1	2	3	3	1	0	0	0	20	0	0	0		1	3	3	6	0
1880	0	4	0	3	3	0		1	1	1	1	3	3	1	0	0	1	20	0	0	1		1	3	3	6	1
1881	1	1	0	1	0	0	2	2	1	0	1	2	2	1	0	0	1	20	0	0	1	2	2	2	2	4	1
1882	1	4	0	2	0	0	2	1	0	1	2	2	1	1	0	0	0	20	0	0	0	2	1	2	1	3	0
1883	0	2	0	1	3	0	2	2	1	0	2	2	2	1	0	0	0	20	0	0	0	2	2	2	2	4	0
1884	0	4	0	3	1	0	2	2	1	0	2	2	2	1	0	0	0	20	0	0	0	2	2	2	2	4	0
1885	0	1	0	1	0	0	3	2	1	1	2	3	3	1	0	0	1	20	0	0	1	3	2	3	3	6	1
1886	0	1	0	2	0	1	2	2	1	1	1	3	3	1	0	0	1	20	0	0	1	2	2	3	3	6	1
1887	0	4	0	2	3	1		1	1	1	1	3	3	1	0	0	1	20	0	0	1		1	3	3	6	1
1888	1	4	0	1	1	1		2	1	1	1	3	3	1	0	0	1	20	0	0	1		2	3	3	6	1
1889	0	4	0	3	1	0	3	2	0	0	2	3	2	1	0	0	0	20	0	0	0	3	2	3	2	5	0
1890	0	3	0	2	0	0	3	1	1	0	2	3	2	1	0	0	1	20	0	0	1	3	1	3	2	5	1
1891	1	2	0	2	2	1	2	1	1	1	1	3	2	1	0	0	1	20	0	0	1	2	1	3	2	5	1
1892	1	1	0	2	4	1	2	2	1	1	1	2	1	1	0	1	0	20	0	0	1	2	2	2	1	3	1
1893	0	4	0	1	3	0		2	0	1	2	3	3	1	0	0	1	20	0	0	1		2	3	3	6	1
1894	1	3	0	2	1	1	2	1	0	1	1	2	1	1	0	0	1	20	0	0	1	2	1	2	1	3	1
1895	0	4	0	2	3	1	2	1	1	1	1	2	2	1	0	1	0	20	0	0	1	2	1	2	2	4	1
1896	1	3	0	2	2	0		2	0	0	2	3	3	1	0	0	0	20	0	0	0		2	3	3	6	0
1897	0	5	0	3	3	0	2	1	1	0	1	1	2	1	1	0	0	20	0	0	1	2	1	1	2	3	1
1898	0	4	0	1	1	0	3	2	0	0	2	2	1	1	0	0	0	20	0	0	0	3	2	2	1	3	0
1899	1	1	0	2	2	0	2	2	0	0	2	2	2	1	0	0	0	20	0	0	0	2	2	2	2	4	0
1900	0	4	0	3	0	0	3	2	0	0	2	3	2	1	0	0	0	20	0	0	0	3	2	3	2	5	0
1901	1	4	0	1	1	1		2	1	1	1	3	3	1	0	0	1	20	0	0	1		2	3	3	6	1
1902	0	3	0	1	0	0	3	2	1	0	2	3	2	1	1	0	0	20	0	0	1	3	2	3	2	5	1
1903	1	1	0	4	0	0	3	2	0	0	2	2	2	1	0	0	0	20	0	0	0	3	2	2	2	4	0
1904	0	1	0	4	1	0	3	3	0	0	2	3	3	1	0	0	0	20	0	0	0	3	3	3	3	6	0
1905	0	1	0	1	3	1	2	2	0	0	2	2	2	1	1	0	0	20	0	0	1	2	2	2	2	4	1
1906	1	4	0	2	4	1		2	1	1	1	3	3	1	0	1	0	20	0	0	1		2	3	3	6	1
1907	1	4	0	3	1	0		2	0	1	2	3	3	1	0	0	0	20	0	0	0		2	3	3	6	0
1908	1	1	0	1	1	1	2	2	0	1	1	2	2	1	0	0	1	20	0	0	1	2	2	2	2	4	1
1909	0	4	0	2	3	1	2	1	1	1	1	2	2	1	0	1	0	20	0	0	1	2	1	2	2	4	1
1910	0	4	0	1	3	0		1	1	1	2	3	3	1	1	0	0	20	0	0	1		1	3	3	6	1
1911	0	2	0	4	0	0	3	3	0	0	2	3	3	1	0	0	0	20	0	0	0	3	3	3	3	6	0
1912	1	2	0	3	0	0	3	3	1	0	2	3	3	1	0	0	0	20	0	0	0	3	3	3	3	6	0
1913	0	3	0	4	3	0	3	3	0	0	2	3	3	1	1	0	0	20	0	0	1	3	3	3	3	6	1
1914	0	4	0	1	3	0		2	1	0	1	3	3	1	1	0	0	20	0	0	1		2	3	3	6	1
1915	0	4	0	3	0	0	3	2	0	0	2	3	2	1	0	0	0	20	0	0	0	3	2	3	2	5	0
1916	0	3	0	3	3	1	3	3	1	1	2	3	3	1	1	0	0	20	0	0	1	3	3	3	3	6	1
1917	0	2	0	3	3	0	3	2	0	1	2	3	3	1	0	0	0	20	0	0	0	3	2	3	3	6	0
1918	0	4	0	2	3	1	2	1	1	1	1	2	2	1	0	1	0	20	0	0	1	2	1	2	2	4	1
1919	1	2	0	3	2	0	3	3	0	0	2	3	3	1	0	0	0	20	0	0	0	3	3	3	3	6	0
1920	1	4	0	1	2	0	2	1	0	0	2	2	2	1	0	0	0	20	0	0	0	2	1	2	2	4	0
1921	1	3	0	2	0	0		2	0	0	2	3	3	1	0	0	0	20	0	0	0		2	3	3	6	0
1922	0	1	0	4	1	0	3	3	0	0	2	3	3	1	0	0	0	20	0	0	0	3	3	3	3	6	0
1923	0	5	0	1	3	1	2	1	0	1	1	2	2	1	0	0	1	20	0	0	1	2	1	2	2	4	1
1924	0	2	0	2	3	0	2	1	1	1	2	2	2	1	0	1	0	20	0	0	1	2	1	2	2	4	1
1925	0	5	0	1	0	1	2	1	0	0	2	2	2	1	0	0	0	20	0	0	0	2	1	2	2	4	0
1926	0	4	0	1	0	1		2	1	1	1	3	3	1	0	0	1	20	0	0	1		2	3	3	6	1
1927	0	4	0	3	0	0	3	2	0	0	2	3	2	1	0	0	0	20	0	0	0	3	2	3	2	5	0
1928	1	2	0	4	0	0	3	3	0	0	2	3	3	1	0	0	0	20	0	0	0	3	3	3	3	6	0
1929	1	3	0	2	2	0		2	1	1	2	3	3	1	0	0	1	20	0	0	1		2	3	3	6	1
1930	0	1	0	3	3	0	3	3	1	0	2	3	3	1	1	0	0	20	0	0	1	3	3	3	3	6	1
1931	1	3	0	2	3	0	1	1	0	0	2	1	1	1	0	0	0	20	0	0	0	1	1	1	1	2	0
1932	1	4	0	3	0	0	3	2	0	0	2	3	2	1	0	0	0	20	0	0	0	3	2	3	2	5	0
1933	0	4	0	2	0	0	3	2	0	0	2	3	2	1	0	0	0	20	0	0	0	3	2	3	2	5	0
1934	1	1	0	3	1	1	3	2	1	1	1	3	3	1	0	0	1	20	0	0	1	3	2	3	3	6	1
1935	0	3	0	2	4	0		2	0	1	2	3	3	1	0	0	0	20	0	0	0		2	3	3	6	0
1936	0	5	0	1	0	1	2	1	0	0	2	2	2	1	0	0	0	20	0	0	0	2	1	2	2	4	0
1937	1	1	0	3	0	0	3	2	0	0	2	3	3	1	0	0	0	20	0	0	0	3	2	3	3	6	0
1938	0	5	0	3	0	1	3	1	0	1	2	3	3	1	0	0	0	20	0	0	0	3	1	3	3	6	0
1939	1	3	0	2	2	0	3	3	1	0	2	3	4	1	1	0	0	20	0	0	1	3	3	3	3	6	1
1940	0	4	0	1	3	0		2	0	1	2	3	3	1	0	0	1	20	0	0	1		2	3	3	6	1
1941	1	5	0	2	1	0	3	2	1	0	2	2	2	1	0	0	0	20	0	0	0	3	2	2	2	4	0
1942	0	5	0	2	1	0	3	2	1	0	2	3	3	1	0	0	0	20	0	0	0	3	2	3	3	6	0
1943	1	4	0	3	3	0	2	2	0	0	2	2	2	1	0	0	0	20	0	0	0	2	2	2	2	4	0
1944	0	3	0	1	0	0	1	2	0	1	2	1	2	1	1	0	0	20	0	0	1	1	2	1	2	3	1
1945	0	3	0	3	1	0	3	3	0	0	2	3	2	1	0	0	0	20	0	0	0	3	3	3	2	5	0
1946	0	5	0	1	3	1	2	1	0	1	1	2	2	1	0	0	1	20	0	0	1	2	1	2	2	4	1
1947	0	1	0	1	1	1	2	2	0	1	0	2	2	1	1	0	0	20	0	0	1	2	2	2	2	4	1
1948	0	1	0	2	3	0	3	1	0	1	2	3	3	1	1	0	0	20	0	0	1	3	1	3	3	6	1
1949	1	4	0	2	2	0	2	2	1	1	2	2	2	1	1	0	0	20	0	0	1	2	2	2	2	4	1
1950	0	2	0	2	0	0	3	2	1	1	2	3	2	1	0	0	1	20	0	0	1	3	2	3	2	5	1
1951	0	4	0	1	0	0		2	0	1	2	3	3	1	0	0	1	20	0	0	1		2	3	3	6	1
1952	0	3	0	1	0	1	1	2	1	1	1	1	2	1	0	0	1	20	0	0	1	1	2	1	2	3	1
1953	0	3	0	3	0	1	3	3	1	0	2	3	3	1	0	0	0	20	0	0	0	3	3	3	3	6	0
1954	0	1	0	2	3	0	3	1	0	1	2	3	3	1	1	0	0	20	0	0	1	3	1	3	3	6	1
1955	0	2	0	3	0	1	2	1	0	1	2	2	2	1	0	0	0	20	1	0	0	2	1	2	2	4	1
1956	1	2	0	3	0	0	3	2	0	1	2	2	2	1	0	0	0	20	0	0	0	3	2	2	2	4	0
1957	0	3	0	3	0	1	3	2	1	1	1	3	2	1	0	0	0	20	1	0	0	3	2	3	2	5	1
1958	0	1	0	2	0	0	2	2	0	1	2	3	3	1	1	0	0	20	0	0	1	2	2	3	3	6	1
1959	1	2	0	3	0	0	3	3	0	0	2	3	2	1	1	0	0	20	0	0	1	3	3	3	2	5	1
1960	1	2	0	3	0	0	3	2	0	0	2	2	2	1	0	0	0	20	0	0	0	3	2	2	2	4	0
1961	0	3	0	1	3	0	1	2	1	0	2	1	2	1	0	0	0	20	0	0	0	1	2	1	2	3	0
1962	0	1	0	2	0	1	2	2	1	1	1	3	3	1	0	0	1	20	0	0	1	2	2	3	3	6	1
1963	1	3	0	3	0	1	3	3	0	1	2	3	3	1	1	0	0	20	0	0	1	3	3	3	3	6	1
1964	0	4	0	1	0	0	3	3	0	1	2	3	2	1	0	0	1	20	0	0	1	3	3	3	2	5	1
1965	1	3	0	3	0	0	3	2	0	0	2	4	2	1	0	0	0	20	0	0	0	3	2	3	2	5	0
1966	0	2	0	1	4	0	3	1	1	1	2	3	2	1	0	1	0	20	0	0	1	3	1	3	2	5	1
1967	0	2	0	3	3	0	3	2	1	0	2	3	3	1	1	0	0	20	0	0	1	3	2	3	3	6	1
1968	1	2	0	4	0	0	3	3	0	0	2	3	3	1	0	0	0	20	0	0	0	3	3	3	3	6	0
1969	0	3	0	4	0	0	3	3	0	0	2	3	3	1	1	0	0	20	0	0	1	3	3	3	3	6	1
1970	1	4	0	3	2	0	3	2	0	0	2	3	2	1	0	0	0	20	0	0	0	3	2	3	2	5	0
1971	1	4	0	2	2	0	2	2	1	1	2	2	2	1	1	0	0	20	0	0	1	2	2	2	2	4	1
1972	0	3	0	2	3	1	2	2	1	1	1	2	2	1	0	0	1	20	0	0	1	2	2	2	2	4	1
1973	1	4	0	2	1	0	2	1	0	1	2	2	2	1	0	0	0	20	0	0	0	2	1	2	2	4	0
1974	1	2	0	3	0	0	3	2	0	1	2	2	2	1	0	0	0	20	0	0	0	3	2	2	2	4	0
1975	1	3	0	2	3	0	2	2	0	0	2	2	2	1	0	0	0	20	0	0	0	2	2	2	2	4	0
1976	1	1	0	3	0	0	3	3	0	0	2	2	2	1	0	0	0	20	0	0	0	3	3	2	2	4	0
1977	0	5	0	2	0	1	3	2	1	1	1	2	2	1	0	0	0	20	0	0	0	3	2	2	2	4	0
1978	0	4	0	2	4	0	2	2	0	0	2	2	2	1	0	0	0	20	0	0	0	2	2	2	2	4	0
1979	1	3	0	1	4	0	1	2	1	1	1	1	2	1	0	1	0	20	0	0	1	1	2	1	2	3	1
1980	0	4	0	2	0	0	2	3	0	1	2	3	3	1	0	0	1	20	0	0	1	2	3	3	3	6	1
1981	1	4	0	1	2	0	2	1	0	0	2	2	2	1	0	0	0	20	0	0	0	2	1	2	2	4	0
1982	0	2	0	1	3	0	1	2	1	0	1	2	2	1	0	1	0	20	0	0	1	1	2	2	2	4	1
1983	0	2	0	2	0	1	3	2	1	1	1	3	3	1	0	0	1	20	0	0	1	3	2	3	3	6	1
1984	1	4	0	1	1	1		2	1	1	1	3	3	1	0	0	1	20	0	0	1		2	3	3	6	1
1985	1	3	0	2	2	0	3	1	1	0	2	3	3	1	1	0	0	20	0	0	1	3	1	3	3	6	1
1986	1	2	0	3	2	0	3	2	1	0	2	2	2	1	0	0	0	20	0	0	0	3	2	2	2	4	0
1987	0	3	0	2	3	1	3	3	1	1	1	3	3	1	0	0	1	20	0	0	1	3	3	3	3	6	1
1988	0	1	0	4	1	0	3	2	0	0	2	2	2	1	0	0	0	20	0	0	0	3	2	2	2	4	0
1989	1	4	0	2	0	0	2	1	0	1	2	2	2	1	0	0	0	20	0	0	0	2	1	2	2	4	0
1990	0	2	0	3	3	0	3	2	0	0	2	3	3	1	0	0	0	20	0	0	0	3	2	3	3	6	0
1991	0	3	0	2	4	0	1	2	0	1	2	2	2	1	0	0	0	20	0	0	0	1	2	2	2	4	0
1992	0	2	0	2	0	1	2	2	1	1	1	3	2	1	0	0	1	20	0	0	1	2	2	3	2	5	1
1993	0	2	0	1	3	1	3	2	0	1	1	3	2	1	0	0	1	20	0	0	1	3	2	3	2	5	1
1994	1	2	0	2	2	1	3	2	0	0	2	2	2	1	1	0	0	20	0	0	1	3	2	2	2	4	1
1995	0	5	0	4	1	0	3	3	1	1	2	3	3	1	0	0	0	20	0	0	0	3	3	3	3	6	0
1996	0	2	0	2	3	0	3	2	1	1	1	2	2	1	0	1	0	20	0	0	1	3	2	2	2	4	1
1997	1	4	0	3	1	0		2	0	1	2	3	3	1	0	0	0	20	0	0	0		2	3	3	6	0
1998	0	4	0	1	3	0		1	1	0	1	3	3	1	1	0	0	20	0	0	1		1	3	3	6	1
1999	1	1	0	3	2	0	3	2	0	0	2	3	3	1	0	0	0	20	0	0	0	3	2	3	3	6	0
2000	0	1	0	4	0	0	3	2	0	0	2	2	2	1	0	0	0	20	0	0	0	3	2	2	2	4	0
2001	0	4	0	3	1	0	3	1	0	0	2	3	2	1	0	0	0	20	0	0	0	3	1	3	2	5	0
2002	0	4	0	1	0	1		2	1	1	1	3	3	1	0	0	1	20	0	0	1		2	3	3	6	1
2003	0	4	0	3	3	0		1	0	0	2	3	3	1	0	0	0	20	0	0	0		1	3	3	6	0
2004	0	5	0	1	1	0	3	3	1	0	2	3	3	1	0	0	0	20	0	0	0	3	3	3	3	6	0
2005	1	4	0	3	2	0	3	2	0	1	2	3	3	1	0	0	0	20	0	0	0	3	2	3	3	6	0
2006	0	4	0	2	3	1	2	1	1	1	1	2	2	1	0	1	0	20	0	0	1	2	1	2	2	4	1
2007	0	3	0	2	0	0	3	1	0	1	2	3	2	1	1	0	0	20	0	0	1	3	1	3	2	5	1
2008	0	3	0	1	0	1	1	2	1	1	1	1	2	1	0	0	1	20	0	0	1	1	2	1	2	3	1
2009	0	2	0	3	1	0	3	2	0	0	2	2	2	1	0	0	0	20	0	0	0	3	2	2	2	4	0
2010	0	2	0	1	3	0	1	2	1	0	1	2	2	1	0	1	0	20	0	0	1	1	2	2	2	4	1
2011	0	2	0	3	3	0	2	1	0	1	2	2	2	1	0	0	1	20	0	0	1	2	1	2	2	4	1
2012	1	1	0	3	1	0	3	3	0	1	2	3	3	1	0	0	0	20	0	0	0	3	3	3	3	6	0
2013	1	4	0	3	2	1	3	2	0	1	2	3	2	1	0	0	0	20	0	0	0	3	2	3	2	5	0
2014	0	4	0	2	0	1		1	1	1	1	3	3	1	0	0	1	20	0	0	1		1	3	3	6	1
2015	0	2	0	2	3	0	3	2	1	1	1	2	2	1	0	1	0	20	0	0	1	3	2	2	2	4	1
2016	0	4	0	2	3	1	2	1	1	1	1	2	2	1	0	1	0	20	0	0	1	2	1	2	2	4	1
2017	0	2	0	1	3	0	1	2	1	1	2	2	2	1	1	0	0	19	0	0	1	1	2	2	2	4	1
2018	0	5	0	2	0	1	3	2	1	1	1	2	2	1	0	0	0	20	0	0	0	3	2	2	2	4	0
2019	0	1	0	1	3	0	3	2	1	0	2	4	3	1	0	0	0	20	0	0	0	3	2	3	3	6	0
2020	1	2	0	1	0	1	2	2	0	1	2	2	2	1	1	0	0	20	0	0	1	2	2	2	2	4	1
2021	0	1	0	2	4	0	2	2	0	0	2	2	2	1	0	0	1	20	0	0	1	2	2	2	2	4	1
2022	0	2	0	1	4	0	3	1	1	1	2	3	2	1	0	1	0	20	0	0	1	3	1	3	2	5	1
2023	0	4	0	1	0	1	3	1	1	1	1	3	3	1	0	0	0	20	1	0	0	3	1	3	3	6	1
2024	0	4	0	3	4	0	2	1	1	1	1	2	2	1	0	0	1	20	0	0	1	2	1	2	2	4	1
2025	1	4	0	2	0	0	3	2	0	0	2	3	2	1	0	0	0	20	0	0	0	3	2	3	2	5	0
2026	0	4	0	2	0	0	3	2	0	0	2	3	2	1	0	0	0	20	0	0	0	3	2	3	2	5	0
2027	0	1	0	1	3	0	2	2	1	1	2	2	2	1	1	0	0	20	0	0	1	2	2	2	2	4	1
2028	1	2	0	3	2	0	3	2	0	0	2	2	2	1	0	0	0	20	0	0	0	3	2	2	2	4	0
2029	0	1	0	4	1	0	3	2	0	0	2	2	2	1	0	0	0	20	0	0	0	3	2	2	2	4	0
2030	1	1	0	3	0	0	3	2	0	1	2	3	3	1	0	0	0	20	0	0	0	3	2	3	3	6	0
2031	0	2	0	2	0	1	3	2	1	1	1	3	2	1	0	0	1	20	0	0	1	3	2	3	2	5	1
2032	0	4	0	4	1	0	2	1	1	1	1	2	2	1	0	0	1	20	0	0	1	2	1	2	2	4	1
2033	0	2	0	3	0	0	3	2	0	0	2	2	2	1	0	0	0	20	0	0	0	3	2	2	2	4	0
2034	1	4	0	2	4	0	1	1	0	1	2	2	3	1	0	0	0	20	0	0	0	1	1	2	3	5	0
2035	0	3	0	1	4	1	1	2	1	1	1	1	2	1	0	0	1	20	0	0	1	1	2	1	2	3	1
2036	1	4	0	2	1	1		1	1	1	1	3	3	1	0	0	1	20	0	0	1		1	3	3	6	1
2037	0	4	0	1	0	1	2	1	0	1	1	3	3	1	0	0	0	20	1	0	0	2	1	3	3	6	1
2038	0	4	0	2	3	1		1	1	1	1	3	3	1	0	0	1	20	0	0	1		1	3	3	6	1
2039	1	2	0	3	0	0	3	2	0	0	2	3	3	1	0	0	0	20	0	0	0	3	2	3	3	6	0
2040	1	5	0	2	3	0	1	2	1	1	1	2	2	1	1	0	0	20	0	0	1	1	2	2	2	4	1
2041	1	4	0	3	2	0	3	2	0	0	2	3	2	1	0	0	0	20	0	0	0	3	2	3	2	5	0
2042	1	5	0	2	4	0	2	1	0	0	2	1	2	1	0	0	0	20	0	0	0	2	1	1	2	3	0
2043	1	1	0	3	0	0	3	2	1	0	2	3	3	1	0	0	0	20	0	0	0	3	2	3	3	6	0
2044	1	3	0	1	2	0	1	1	1	0	2	1	1	1	0	0	0	20	0	0	0	1	1	1	1	2	0
2045	0	4	0	2	3	1	2	1	1	1	1	2	2	1	0	1	0	20	0	0	1	2	1	2	2	4	1
2046	1	5	0	2	3	0	2	1	0	0	2	2	2	1	0	0	0	20	0	0	0	2	1	2	2	4	0
2047	1	4	0	1	0	0	2	1	0	1	2	2	2	1	0	0	0	20	0	0	0	2	1	2	2	4	0
2048	0	3	0	1	0	1	1	2	1	1	1	1	2	1	0	0	1	20	0	0	1	1	2	1	2	3	1
2049	1	1	0	4	0	0	3	3	0	0	2	3	3	1	0	0	0	20	0	0	0	3	3	3	3	6	0
2050	1	4	0	2	2	0	2	1	1	1	1	2	1	1	0	0	1	20	0	0	1	2	1	2	1	3	1
2051	1	2	0	3	2	0	3	2	0	0	2	2	2	1	0	0	0	20	0	0	0	3	2	2	2	4	0
2052	1	4	0	1	0	0	3	2	0	0	2	2	1	1	0	0	0	20	0	0	0	3	2	2	1	3	0
2053	0	1	0	4	2	0	3	2	1	0	2	2	2	1	0	0	0	20	0	0	0	3	2	2	2	4	0
2054	1	3	0	3	2	0	4	3	0	0	2	3	3	1	0	0	0	20	0	0	0	3	3	3	3	6	0
2055	0	4	0	2	0	0	2	3	0	1	2	3	3	1	0	0	1	20	0	0	1	2	3	3	3	6	1
2056	0	4	0	3	3	1		1	1	1	2	3	3	1	1	0	0	20	0	0	1		1	3	3	6	1
2057	1	4	0	2	0	0	3	2	0	0	2	3	2	1	0	0	0	20	0	0	0	3	2	3	2	5	0
2058	0	4	0	1	3	0		1	1	1	2	3	3	1	1	0	0	20	0	0	1		1	3	3	6	1
2059	0	2	0	3	4	0	2	2	0	0	2	2	2	1	0	0	1	20	0	0	1	2	2	2	2	4	1
2060	1	1	0	3	1	0	3	3	0	1	2	3	3	1	0	0	0	20	0	0	0	3	3	3	3	6	0
2061	0	3	0	1	0	0	1	2	0	1	2	1	2	1	1	0	0	20	0	0	1	1	2	1	2	3	1
2062	0	3	0	3	3	1	3	3	0	1	2	3	3	1	1	0	0	20	0	0	1	3	3	3	3	6	1
2063	1	1	0	3	1	0	3	2	0	1	2	3	3	1	0	0	0	20	0	0	0	3	2	3	3	6	0
2064	1	3	0	3	0	0	3	3	0	1	2	3	2	1	0	0	0	20	0	0	0	3	3	3	2	5	0
2065	1	1	0	2	4	1	2	2	1	1	1	2	2	1	0	1	0	20	0	0	1	2	2	2	2	4	1
2066	0	2	0	2	1	1	3	2	0	1	1	3	2	1	0	0	1	20	0	0	1	3	2	3	2	5	1
2067	1	1	0	2	2	0	2	2	0	0	2	2	2	1	0	0	0	20	0	0	0	2	2	2	2	4	0
2068	0	3	0	3	1	0	3	3	0	0	2	3	2	1	0	0	0	20	0	0	0	3	3	3	2	5	0
2069	1	3	0	2	3	1	2	3	0	1	1	2	1	1	0	0	1	20	0	0	1	2	3	2	1	3	1
2070	0	4	0	2	0	1	1	1	1	1	2	2	2	1	0	0	0	20	0	0	0	1	1	2	2	4	0
2071	1	1	0	1	1	1	2	2	0	1	1	2	2	1	0	0	1	20	0	0	1	2	2	2	2	4	1
2072	0	3	0	3	4	0	3	3	0	0	2	3	2	1	0	0	0	20	0	0	0	3	3	3	2	5	0
2073	0	3	0	2	0	1	3	3	1	1	2	3	3	1	1	0	0	20	0	0	1	3	3	3	3	6	1
2074	1	1	0	2	2	0	2	2	0	0	2	2	2	1	0	0	0	20	0	0	0	2	2	2	2	4	0
2075	0	3	0	3	4	0	3	2	1	0	2	3	3	1	0	1	0	20	0	0	1	3	2	3	3	6	1
2076	1	1	0	3	0	0	3	3	0	1	2	3	3	1	0	0	0	20	0	0	0	3	3	3	3	6	0
2077	0	4	0	2	3	1	2	1	1	1	1	2	2	1	0	1	0	20	0	0	1	2	1	2	2	4	1
2078	1	2	0	3	0	0	3	2	0	0	2	2	2	1	0	0	0	20	0	0	0	3	2	2	2	4	0
2079	0	1	0	1	3	0	2	2	1	0	2	2	2	1	0	0	0	20	0	0	0	2	2	2	2	4	0
2080	0	4	0	1	0	1	3	1	0	1	1	3	3	1	0	0	0	20	1	0	0	3	1	3	3	6	1
2081	1	2	0	4	1	1	1	2	0	1	2	1	2	1	1	0	0	20	0	0	1	1	2	1	2	3	1
2082	1	1	0	3	1	1	2	2	1	1	1	3	3	1	0	0	1	20	0	0	1	2	2	3	3	6	1
2083	0	2	0	1	3	0	1	2	1	1	2	2	2	1	1	0	0	20	0	0	1	1	2	2	2	4	1
2084	0	4	0	2	0	0	2	2	1	1	1	2	2	1	0	0	1	20	0	0	1	2	2	2	2	4	1
2085	0	2	0	2	3	0	3	2	0	1	2	3	2	1	0	0	1	20	0	0	1	3	2	3	2	5	1
2086	1	1	0	3	2	0	3	2	0	0	2	3	3	1	0	0	0	20	0	0	0	3	2	3	3	6	0
2087	0	5	0	1	1	0	3	3	1	0	2	3	3	1	0	0	0	20	0	0	0	3	3	3	3	6	0
2088	0	3	0	2	0	0	3	3	0	0	2	3	3	1	1	0	0	20	0	0	1	3	3	3	3	6	1
2089	0	4	0	1	0	0	3	3	0	1	2	3	2	1	0	0	1	20	0	0	1	3	3	3	2	5	1
2090	0	4	0	1	0	0		2	0	1	2	3	3	1	0	0	1	20	0	0	1		2	3	3	6	1
2091	0	4	0	2	3	1		1	1	1	1	3	3	1	0	0	1	20	0	0	1		1	3	3	6	1
2092	0	4	0	2	0	0	3	1	0	0	2	3	2	1	0	0	0	20	0	0	0	3	1	3	2	5	0
2093	0	4	0	2	3	1	2	1	1	1	1	2	2	1	0	1	0	20	0	0	1	2	1	2	2	4	1
2094	0	1	0	1	3	0	1	2	1	0	2	1	1	1	0	0	0	20	0	0	0	1	2	1	1	2	0
2095	0	3	0	1	1	1	1	2	1	1	1	1	2	1	0	0	1	20	0	0	1	1	2	1	2	3	1
2096	0	4	0	1	0	1	2	1	0	1	1	3	2	1	0	0	0	20	1	0	0	2	1	3	2	5	1
2097	0	4	0	1	0	1	2	1	0	1	2	2	2	1	0	0	0	20	0	0	0	2	1	2	2	4	0
2098	0	4	0	2	3	1	2	1	1	1	1	2	2	1	0	1	0	20	0	0	1	2	1	2	2	4	1
2099	0	4	0	1	3	0		1	1	1	2	3	3	1	0	0	0	20	0	0	0		1	3	3	6	0
2100	0	1	0	4	0	0	3	2	0	0	2	2	2	1	0	0	0	20	0	0	0	3	2	2	2	4	0
2101	1	1	0	3	0	0	3	1	0	0	2	3	3	1	0	0	0	20	0	0	0	3	1	3	3	6	0
2102	0	1	0	3	3	1	3	3	1	1	2	3	3	1	1	0	0	20	0	0	1	3	3	3	3	6	1
2103	0	4	0	2	3	1	2	1	1	1	1	2	2	1	0	1	0	20	0	0	1	2	1	2	2	4	1
2104	0	4	0	3	2	0	3	2	0	1	2	3	3	1	0	0	0	20	0	0	0	3	2	3	3	6	0
2105	0	4	0	2	0	0		1	0	1	2	3	3	1	0	0	1	20	0	0	1		1	3	3	6	1
2106	1	4	0	2	0	0	2	1	0	1	2	2	1	1	0	0	0	20	0	0	0	2	1	2	1	3	0
2107	0	3	0	2	0	1		2	0	1	2	3	3	1	1	0	0	20	0	0	1		2	3	3	6	1
2108	0	3	0	4	0	1	3	3	0	1	2	3	3	1	1	0	0	20	0	0	1	3	3	3	3	6	1
2109	1	1	0	3	0	0	3	2	0	1	2	3	3	1	0	0	0	20	0	0	0	3	2	3	3	6	0
2110	1	1	0	3	1	1	3	2	1	1	1	3	3	1	0	0	1	20	0	0	1	3	2	3	3	6	1
2111	1	1	0	3	2	0	3	2	0	0	2	3	3	1	0	0	0	20	0	0	0	3	2	3	3	6	0
2112	1	4	0	2	4	0		2	1	0	1	3	3	1	0	1	0	20	0	0	1		2	3	3	6	1
2113	0	4	0	2	3	1	2	1	1	1	1	2	2	1	0	1	0	20	0	0	1	2	1	2	2	4	1
2114	0	4	0	3	0	1		2	1	1	2	3	3	1	0	0	0	20	0	0	0		2	3	3	6	0
2115	0	3	0	1	3	0	1	2	1	1	2	1	2	1	1	0	0	20	0	0	1	1	2	1	2	3	1
2116	1	2	0	3	3	0	3	2	0	1	2	3	3	1	0	0	0	20	0	0	0	3	2	3	3	6	0
2117	0	1	0	3	3	0	3	3	0	0	2	3	3	1	0	0	0	20	0	0	0	3	3	3	3	6	0
2118	1	5	0	2	4	0	3	2	0	0	2	2	2	1	0	0	0	20	0	0	0	3	2	2	2	4	0
2119	1	2	0	3	0	0	3	2	0	1	2	2	2	1	0	0	0	20	0	0	0	3	2	2	2	4	0
2120	0	2	0	3	3	1	2	3	1	1	2	3	3	1	1	0	0	20	0	0	1	2	3	3	3	6	1
2121	1	4	0	2	1	1		1	1	1	1	3	3	1	0	0	1	20	0	0	1		1	3	3	6	1
2122	1	2	0	3	2	0	2	3	1	1	2	3	4	1	1	0	0	20	0	0	1	2	3	3	3	6	1
2123	1	5	0	1	4	0	3	3	0	0	2	3	3	1	0	0	0	20	0	0	0	3	3	3	3	6	0
2124	1	1	0	3	0	0	4	3	1	0	2	4	3	1	1	0	0	20	0	0	1	3	3	3	3	6	1
2125	1	2	0	3	2	0	3	2	0	0	2	2	2	1	0	0	0	20	0	0	0	3	2	2	2	4	0
2126	0	1	0	4	0	0	3	2	0	0	2	2	2	1	0	0	0	20	0	0	0	3	2	2	2	4	0
2127	0	5	0	1	3	1	2	2	0	1	1	2	2	1	0	0	1	20	0	0	1	2	2	2	2	4	1
2128	0	5	0	2	1	0	3	2	1	0	2	3	3	1	0	0	0	20	0	0	0	3	2	3	3	6	0
2129	1	4	0	1	1	1		2	1	1	1	3	3	1	0	0	1	20	0	0	1		2	3	3	6	1
2130	0	3	0	3	0	0	4	2	1	1	2	3	2	1	1	0	0	20	0	0	1	3	2	3	2	5	1
2131	0	1	0	3	3	0	3	3	1	0	2	3	3	1	1	0	0	20	0	0	1	3	3	3	3	6	1
2132	0	4	0	2	4	0	1	1	0	1	2	2	2	1	0	0	0	20	0	0	0	1	1	2	2	4	0
2133	0	1	0	1	3	0	2	2	1	0	2	2	2	1	1	0	0	20	0	0	1	2	2	2	2	4	1
2134	0	4	0	2	0	1		1	1	1	1	3	3	1	0	0	1	20	0	0	1		1	3	3	6	1
2135	1	4	0	2	3	0	1	2	0	0	2	2	2	1	0	0	0	20	0	0	0	1	2	2	2	4	0
2136	1	1	0	4	0	0	3	2	0	0	2	2	2	1	0	0	0	20	0	0	0	3	2	2	2	4	0
2137	1	3	0	3	1	0	3	3	0	0	2	3	3	1	0	0	0	20	0	0	0	3	3	3	3	6	0
2138	1	2	0	1	0	1	2	2	0	1	2	2	2	1	1	0	0	20	0	0	1	2	2	2	2	4	1
2139	0	4	0	2	3	1	2	1	1	1	1	2	2	1	0	1	0	20	0	0	1	2	1	2	2	4	1
2140	1	1	0	2	2	0	2	2	0	0	2	2	2	1	0	0	0	20	0	0	0	2	2	2	2	4	0
2141	1	4	0	1	0	1	2	1	0	0	2	3	2	1	0	0	0	20	0	0	0	2	1	3	2	5	0
2142	1	4	0	2	0	0	3	2	0	1	2	3	2	1	0	0	0	20	0	0	0	3	2	3	2	5	0
2143	1	2	0	4	0	0	3	3	0	0	2	3	3	1	0	0	0	20	0	0	0	3	3	3	3	6	0
2144	0	4	0	3	3	1		1	1	1	2	3	3	1	1	0	0	20	0	0	1		1	3	3	6	1
2145	1	3	0	1	4	0	1	2	1	1	1	1	2	1	0	1	0	20	0	0	1	1	2	1	2	3	1
2146	1	4	0	1	0	1	2	1	0	0	2	3	2	1	0	0	0	20	0	0	0	2	1	3	2	5	0
2147	1	4	0	2	4	0	1	1	0	1	2	2	3	1	0	0	0	20	0	0	0	1	1	2	3	5	0
2148	1	4	0	2	1	0	2	1	0	0	2	2	1	1	0	0	0	20	0	0	0	2	1	2	1	3	0
2149	1	2	0	3	2	0	2	3	1	1	2	3	4	1	1	0	0	20	0	0	1	2	3	3	3	6	1
2150	0	2	0	3	1	0	3	2	0	1	2	2	2	1	0	0	0	20	0	0	0	3	2	2	2	4	0
2151	0	4	0	2	3	1	2	1	1	1	1	2	2	1	0	1	0	20	0	0	1	2	1	2	2	4	1
2152	1	4	0	3	1	0	3	1	0	0	2	3	2	1	0	0	0	20	0	0	0	3	1	3	2	5	0
2153	0	1	0	2	0	0	2	2	1	0	1	3	3	1	0	0	1	20	0	0	1	2	2	3	3	6	1
2154	1	2	0	3	0	0	3	2	0	0	2	2	2	1	0	0	0	20	0	0	0	3	2	2	2	4	0
2155	1	2	0	3	0	0	3	2	0	0	2	3	3	1	0	0	0	20	0	0	0	3	2	3	3	6	0
2156	1	1	0	1	1	1	2	2	0	1	1	2	2	1	0	0	1	20	0	0	1	2	2	2	2	4	1
2157	0	2	0	3	3	0	3	2	0	1	2	3	3	1	0	0	0	20	0	0	0	3	2	3	3	6	0
2158	0	2	0	3	1	0	3	2	0	1	2	2	2	1	0	0	0	20	0	0	0	3	2	2	2	4	0
2159	0	4	0	1	3	0		2	0	1	2	3	3	1	0	0	1	20	0	0	1		2	3	3	6	1
2160	1	4	0	2	4	0		2	1	0	1	3	3	1	0	1	0	20	0	0	1		2	3	3	6	1
2161	1	4	0	3	1	0	3	2	0	0	2	3	2	1	0	0	0	20	0	0	0	3	2	3	2	5	0
2162	1	1	0	4	1	0	3	3	0	0	2	3	3	1	0	0	0	20	0	0	0	3	3	3	3	6	0
2163	0	4	0	3	3	1		1	1	1	2	3	3	1	1	0	0	20	0	0	1		1	3	3	6	1
2164	0	3	0	2	4	1		2	1	1	0	3	3	1	0	1	0	20	0	0	1		2	3	3	6	1
2165	0	4	0	2	3	0	3	1	1	1	1	3	2	1	0	0	1	20	0	0	1	3	1	3	2	5	1
2166	0	1	0	4	1	0	3	3	0	0	2	3	3	1	0	0	0	20	0	0	0	3	3	3	3	6	0
2167	1	2	0	3	0	0	3	3	0	0	2	3	3	1	0	0	0	20	0	0	0	3	3	3	3	6	0
2168	0	4	0	2	0	0	3	1	0	0	2	3	3	1	0	0	0	20	0	0	0	3	1	3	3	6	0
2169	1	2	0	3	0	0	3	2	0	0	2	2	2	1	0	0	0	20	0	0	0	3	2	2	2	4	0
2170	1	4	0	1	0	1	2	1	0	0	2	3	2	1	0	0	0	20	0	0	0	2	1	3	2	5	0
2171	0	3	0	1	0	1	1	2	0	0	1	1	2	1	0	0	0	20	0	0	0	1	2	1	2	3	0
2172	1	1	0	2	1	0	2	2	0	0	2	2	2	1	0	0	0	20	0	0	0	2	2	2	2	4	0
2173	1	5	0	4	1	0	1	1	1	1	2	1	2	1	0	0	0	20	0	0	0	1	1	1	2	3	0
2174	1	2	0	3	2	0	3	2	0	0	2	2	2	1	0	0	0	20	0	0	0	3	2	2	2	4	0
2175	1	3	0	3	1	0	3	3	0	0	2	3	3	1	0	0	0	20	0	0	0	3	3	3	3	6	0
2176	0	4	0	3	3	0		1	0	1	2	3	3	1	0	0	0	20	0	0	0		1	3	3	6	0
2177	1	4	0	1	1	1		2	1	1	1	3	3	1	0	0	1	20	0	0	1		2	3	3	6	1
2178	1	1	0	2	4	1	2	2	1	1	1	2	1	1	0	1	0	20	0	0	1	2	2	2	1	3	1
2179	0	5	0	2	4	0	3	2	0	0	2	2	2	1	0	0	0	20	0	0	0	3	2	2	2	4	0
2180	1	5	0	2	1	0	2	1	1	0	2	2	2	1	0	0	0	20	0	0	0	2	1	2	2	4	0
2181	1	3	0	3	0	0	3	3	0	0	2	3	3	1	0	0	0	20	0	0	0	3	3	3	3	6	0
2182	1	1	0	3	0	0	3	2	0	0	2	2	2	1	0	0	0	20	0	0	0	3	2	2	2	4	0
2183	0	3	0	1	0	1	1	2	1	1	1	1	2	1	0	0	1	20	0	0	1	1	2	1	2	3	1
2184	0	2	0	3	3	1	2	2	1	1	2	3	3	1	1	0	0	20	0	0	1	2	2	3	3	6	1
2185	1	4	0	3	1	0	3	2	0	1	2	3	3	1	0	0	0	20	0	0	0	3	2	3	3	6	0
2186	0	1	0	4	0	0	3	2	0	0	2	2	2	1	0	0	0	20	0	0	0	3	2	2	2	4	0
2187	0	1	0	3	3	0	2	2	0	1	2	3	3	1	0	0	1	20	0	0	1	2	2	3	3	6	1
2188	1	4	0	3	2	0	3	2	0	1	2	3	3	1	0	0	0	20	0	0	0	3	2	3	3	6	0
2189	1	1	0	3	2	0	3	2	1	1	2	3	3	1	0	0	0	20	0	0	0	3	2	3	3	6	0
2190	1	4	0	2	4	0	2	2	0	0	2	2	1	1	0	0	0	20	0	0	0	2	2	2	1	3	0
2191	0	1	0	4	0	0	3	2	0	0	2	2	2	1	0	0	0	20	0	0	0	3	2	2	2	4	0
2192	1	2	0	2	0	1	3	2	0	0	2	2	2	1	1	0	0	20	0	0	1	3	2	2	2	4	1
2193	0	1	0	1	0	0	2	2	0	1	2	2	2	1	0	0	0	20	0	0	0	2	2	2	2	4	0
2194	0	4	0	2	0	0	3	1	0	0	2	3	3	1	0	0	0	20	0	0	0	3	1	3	3	6	0
2195	0	5	0	3	1	0	3	2	1	1	2	3	3	1	0	0	0	20	0	0	0	3	2	3	3	6	0
2196	0	1	0	2	3	1	2	2	1	1	2	3	3	1	1	0	0	20	0	0	1	2	2	3	3	6	1
2197	0	4	0	1	0	0	2	2	1	1	2	2	2	1	1	0	0	20	0	0	1	2	2	2	2	4	1
2198	0	4	0	2	3	1	2	1	1	1	1	2	2	1	0	1	0	20	0	0	1	2	1	2	2	4	1
2199	1	1	0	4	2	0	3	1	0	0	2	3	2	1	0	0	0	20	0	0	0	3	1	3	2	5	0
[truncated: 3,943 more rows]

## Sheet: raw european  SII
id	sex	areas	Immigrants	households	breastfeeding	pacifiernight	Fatheroccprofile	motheroccprofile	smokinghabits	cariogenicdiet	brushingteeth	lowedulevelfatather	lowedulevelmother	nkids	enamel	precavitated	cavitated	teethpresent	filled	bleeding	cariestotal	fatherocc2	motherocc2	fathered	mothered	parentsed	cariesEx
9	0	1	0	1	4	1	2	1	1	1	1	2	2	1	0	1	0	20	0	0	1	2	1	2	2	4	1
60	0	1	0	1	3	0	3	2	1	0	2	3	3	1	0	0	0	20	0	1	0	3	2	3	3	6	0
142	0	1	0	1	0	0	2	2	0	1	2	2	2	1	0	0	0	20	0	1	0	2	2	2	2	4	0
156	0	1	0	1	1	0	2	2	1	0	2	2	2	1	0	0	0	20	0	1	0	2	2	2	2	4	0
158	0	1	0	1	4	1	2	1	1	1	1	2	2	1	0	1	0	20	0	1	1	2	1	2	2	4	1
184	0	1	0	1	3	0	2	2	1	0	2	2	2	1	1	0	0	20	0	1	1	2	2	2	2	4	1
196	1	1	0	1	0	0	2	2	1	0	1	2	2	1	0	0	1	20	0	1	1	2	2	2	2	4	1
208	1	1	0	1	1	1	2	2	0	1	1	2	2	1	0	0	1	20	0	1	1	2	2	2	2	4	1
211	1	1	0	1	0	1	2	2	0	0	2	2	2	1	1	0	0	20	0	1	1	2	2	2	2	4	1
230	0	1	0	1	3	0	2	2	1	0	2	2	2	1	0	0	0	20	0	1	0	2	2	2	2	4	0
304	0	1	0	1	3	0	4	2	1	0	2	3	3	1	0	0	0	20	0	1	0	3	2	3	3	6	0
357	0	1	0	1	3	0	2	2	1	1	2	2	2	1	1	0	0	20	0	1	1	2	2	2	2	4	1
362	1	1	0	1	1	1	2	2	0	1	1	2	2	1	0	0	1	20	0	1	1	2	2	2	2	4	1
374	0	1	0	1	3	0	2	2	0	1	1	2	2	1	1	0	0	20	0	1	1	2	2	2	2	4	1
381	0	1	0	1	3	0	2	2	0	0	2	2	2	1	1	0	0	20	0	1	1	2	2	2	2	4	1
395	0	1	0	1	3	0	2	2	0	1	1	2	2	1	1	0	0	20	0	1	1	2	2	2	2	4	1
401	1	1	0	1	0	0	2	2	1	0	1	2	2	1	0	0	1	20	0	1	1	2	2	2	2	4	1
474	0	1	0	1	3	0	2	2	1	0	2	2	2	1	1	0	0	20	0	1	1	2	2	2	2	4	1
535	0	1	0	1	1	0	2	2	0	0	2	2	2	1	0	0	0	20	0	1	0	2	2	2	2	4	0
606	0	1	0	1	3	0	2	2	1	0	2	2	2	1	0	0	0	20	0	1	0	2	2	2	2	4	0
639	0	1	0	1	0	0	2	2	0	1	2	2	2	1	0	0	0	20	0	1	0	2	2	2	2	4	0
724	0	1	0	1	1	1	2	2	0	1	0	2	2	1	1	0	0	20	0	1	1	2	2	2	2	4	1
754	0	1	0	1	0	0	2	2	0	1	2	2	2	1	0	0	0	20	0	1	0	2	2	2	2	4	0
784	1	1	0	1	1	1	2	2	0	1	1	2	2	1	0	0	1	20	0	1	1	2	2	2	2	4	1
850	1	1	0	1	0	0	3	3	0	1	2	3	3	1	1	0	0	20	0	1	1	3	3	3	3	6	1
884	1	1	0	1	1	1	2	2	0	1	1	2	2	1	0	0	1	20	0	1	1	2	2	2	2	4	1
885	1	1	0	1	3	0	2	2	1	1	1	2	2	1	1	0	0	20	0	1	1	2	2	2	2	4	1
900	0	1	0	1	3	0	2	2	1	0	2	2	2	1	1	0	0	20	0	1	1	2	2	2	2	4	1
926	0	1	0	1	0	1	1	1	0	1	0	2	2	1	1	0	0	20	0	1	1	1	1	2	2	4	1
935	0	1	0	1	0	0	3	2	1	1	2	3	3	1	0	0	1	20	0	1	1	3	2	3	3	6	1
936	0	1	0	1	0	1	2	1	0	0	0	2	2	1	1	0	0	20	0	1	1	2	1	2	2	4	1
968	1	1	0	1	1	1	2	2	0	1	1	2	2	1	0	0	1	20	0	1	1	2	2	2	2	4	1
981	1	1	0	1	0	0	2	2	1	0	1	2	2	1	0	0	1	20	0	1	1	2	2	2	2	4	1
982	0	1	0	1	3	0	3	2	0	1	2	3	3	1	0	0	1	20	0	1	1	3	2	3	3	6	1
1001	1	1	0	1	1	1	2	2	0	1	1	2	2	1	0	0	1	20	0	1	1	2	2	2	2	4	1
1050	0	1	0	1	0	1	1	1	1	1	2	2	2	1	0	0	0	20	0	1	0	1	1	2	2	4	0
1097	0	1	0	1	3	0	1	2	1	0	2	1	1	1	0	0	0	20	0	1	0	1	2	1	1	2	0
1106	0	1	0	1	3	0	2	2	1	1	2	2	2	1	1	0	0	20	0	1	1	2	2	2	2	4	1
1128	0	1	0	1	3	0	1	2	1	0	2	1	1	1	0	0	0	20	0	1	0	1	2	1	1	2	0
1136	0	1	0	1	0	0	2	2	0	1	2	2	2	1	0	0	0	20	0	1	0	2	2	2	2	4	0
1174	0	1	0	1	3	0	2	2	1	1	2	2	2	1	1	0	0	20	0	1	1	2	2	2	2	4	1
1239	0	1	0	1	3	0	3	2	1	0	2	3	3	1	0	0	0	20	0	1	0	3	2	3	3	6	0
1252	0	1	0	1	4	1	2	1	1	1	1	2	2	1	0	1	0	20	0	1	1	2	1	2	2	4	1
1380	1	1	0	1	3	0	2	2	1	1	1	2	2	2	1	0	0	20	0	1	1	2	2	2	2	4	1
1381	0	1	0	1	3	0	2	2	1	0	2	2	2	2	0	0	0	20	0	1	0	2	2	2	2	4	0
1384	0	1	0	1	1	0	2	2	1	0	2	2	2	2	0	0	0	20	0	1	0	2	2	2	2	4	0
1396	0	1	0	1	3	0	2	2	0	1	1	2	2	2	1	0	0	20	0	1	1	2	2	2	2	4	1
1481	0	1	0	1	3	0	2	2	1	1	2	2	2	1	1	0	0	20	0	0	1	2	2	2	2	4	1
1483	1	1	0	1	3	0	2	2	0	1	1	2	2	1	1	0	0	20	0	0	1	2	2	2	2	4	1
1522	0	1	0	1	3	0	2	2	1	1	2	2	2	1	1	0	0	20	0	0	1	2	2	2	2	4	1
1612	0	1	0	1	3	0	3	1	1	1	2	3	3	1	1	0	0	20	0	0	1	3	1	3	3	6	1
1619	0	1	0	1	0	0	3	2	1	1	2	3	3	1	0	0	1	20	0	0	1	3	2	3	3	6	1
1632	1	1	0	1	1	1	2	2	0	1	1	2	2	1	0	0	1	20	0	0	1	2	2	2	2	4	1
1669	0	1	0	1	3	0	2	2	1	0	1	2	2	1	1	0	0	20	0	0	1	2	2	2	2	4	1
1721	0	1	0	1	0	0	2	2	0	1	2	2	2	1	0	0	0	20	0	0	0	2	2	2	2	4	0
1760	1	1	0	1	1	1	2	2	0	1	1	2	2	1	0	0	1	20	0	0	1	2	2	2	2	4	1
1807	0	1	0	1	3	0	3	2	1	0	2	3	3	1	0	0	0	20	0	0	0	3	2	3	3	6	0
1835	1	1	0	1	0	0	2	2	1	0	1	2	2	1	0	0	1	20	0	0	1	2	2	2	2	4	1
1836	1	1	0	1	1	1	2	2	0	1	1	2	2	1	0	0	1	20	0	0	1	2	2	2	2	4	1
1861	1	1	0	1	0	0	2	2	1	0	1	2	2	1	0	0	1	20	0	0	1	2	2	2	2	4	1
1865	0	1	0	1	3	0	2	2	1	0	2	2	2	1	0	0	0	20	0	0	0	2	2	2	2	4	0
1881	1	1	0	1	0	0	2	2	1	0	1	2	2	1	0	0	1	20	0	0	1	2	2	2	2	4	1
1885	0	1	0	1	0	0	3	2	1	1	2	3	3	1	0	0	1	20	0	0	1	3	2	3	3	6	1
1905	0	1	0	1	3	1	2	2	0	0	2	2	2	1	1	0	0	20	0	0	1	2	2	2	2	4	1
1908	1	1	0	1	1	1	2	2	0	1	1	2	2	1	0	0	1	20	0	0	1	2	2	2	2	4	1
1947	0	1	0	1	1	1	2	2	0	1	0	2	2	1	1	0	0	20	0	0	1	2	2	2	2	4	1
2019	0	1	0	1	3	0	3	2	1	0	2	4	3	1	0	0	0	20	0	0	0	3	2	3	3	6	0
2027	0	1	0	1	3	0	2	2	1	1	2	2	2	1	1	0	0	20	0	0	1	2	2	2	2	4	1
2071	1	1	0	1	1	1	2	2	0	1	1	2	2	1	0	0	1	20	0	0	1	2	2	2	2	4	1
2079	0	1	0	1	3	0	2	2	1	0	2	2	2	1	0	0	0	20	0	0	0	2	2	2	2	4	0
2094	0	1	0	1	3	0	1	2	1	0	2	1	1	1	0	0	0	20	0	0	0	1	2	1	1	2	0
2133	0	1	0	1	3	0	2	2	1	0	2	2	2	1	1	0	0	20	0	0	1	2	2	2	2	4	1
2156	1	1	0	1	1	1	2	2	0	1	1	2	2	1	0	0	1	20	0	0	1	2	2	2	2	4	1
2193	0	1	0	1	0	0	2	2	0	1	2	2	2	1	0	0	0	20	0	0	0	2	2	2	2	4	0
2234	0	1	0	1	3	0	2	2	1	0	2	2	2	1	0	0	0	20	0	0	0	2	2	2	2	4	0
2300	0	1	0	1	3	0	3	2	1	0	2	3	3	1	0	0	0	20	0	0	0	3	2	3	3	6	0
2306	0	1	0	1	3	0	2	2	1	0	2	2	2	1	0	0	0	20	0	0	0	2	2	2	2	4	0
2322	1	1	0	1	0	0	2	2	0	0	2	3	3	1	1	0	0	20	0	0	1	2	2	3	3	6	1
2324	0	1	0	1	3	0	2	2	1	0	1	2	2	1	1	0	0	20	0	0	1	2	2	2	2	4	1
2368	0	1	0	1	3	0	2	2	1	1	2	2	2	1	1	0	0	20	0	0	1	2	2	2	2	4	1
2370	1	1	0	1	1	1	2	2	0	1	1	2	2	1	0	0	1	20	0	0	1	2	2	2	2	4	1
2397	0	1	0	1	3	0	3	2	1	0	2	3	3	1	0	0	0	20	0	0	0	3	2	3	3	6	0
2418	0	1	0	1	3	0	2	2	1	0	2	2	2	1	0	0	0	20	0	0	0	2	2	2	2	4	0
2444	0	1	0	1	3	0	1	2	1	0	2	1	1	1	0	0	0	20	0	0	0	1	2	1	1	2	0
2446	0	1	0	1	0	0	1	2	0	1	2	2	2	1	0	0	0	20	0	0	0	1	2	2	2	4	0
2525	0	1	0	1	3	0	3	2	1	0	2	3	3	1	0	0	0	20	0	0	0	3	2	3	3	6	0
2542	0	1	0	1	0	0	3	2	1	1	2	3	3	1	0	0	1	20	0	0	1	3	2	3	3	6	1
2552	0	1	0	1	3	0	2	2	0	1	1	2	2	1	1	0	0	20	0	0	1	2	2	2	2	4	1
2571	0	1	0	1	3	0	3	2	0	1	2	3	3	1	0	0	1	20	0	0	1	3	2	3	3	6	1
2644	0	1	0	1	1	1	2	2	0	1	0	2	2	1	1	0	0	20	0	0	1	2	2	2	2	4	1
2680	1	1	0	1	1	1	2	2	0	1	1	2	2	1	0	0	1	20	0	0	1	2	2	2	2	4	1
2685	1	1	0	1	1	1	2	2	0	1	1	2	2	1	0	0	1	20	0	0	1	2	2	2	2	4	1
2687	1	1	0	1	0	0	3	1	0	0	2	3	4	1	1	0	0	20	0	0	1	3	1	3	3	6	1
2723	0	1	0	1	3	0	2	2	1	0	2	2	2	1	0	0	0	20	0	0	0	2	2	2	2	4	0
2731	0	1	0	1	3	0	3	2	1	0	2	3	3	1	0	0	0	20	0	0	0	3	2	3	3	6	0
2748	1	1	0	1	1	1	2	2	0	1	1	2	2	1	0	0	1	20	0	0	1	2	2	2	2	4	1
2815	0	1	0	1	3	0	2	2	0	1	1	2	2	1	1	0	0	20	0	0	1	2	2	2	2	4	1
2846	0	1	0	1	0	0	2	3	0	1	2	3	3	1	0	0	1	20	0	0	1	2	3	3	3	6	1
2859	1	1	0	1	3	0	2	2	0	1	1	2	2	1	1	0	0	20	0	0	1	2	2	2	2	4	1
2864	0	1	0	1	0	0	2	2	0	1	2	2	2	1	0	0	0	20	0	0	0	2	2	2	2	4	0
2868	0	1	0	1	3	0	4	2	1	0	2	4	3	1	0	0	0	20	0	0	0	3	2	3	3	6	0
2962	0	1	0	1	3	0	2	2	0	0	2	2	2	1	1	0	0	20	0	0	1	2	2	2	2	4	1
3012	0	1	0	1	3	0	1	2	1	0	2	1	1	1	0	0	0	20	0	0	0	1	2	1	1	2	0
3014	0	1	0	1	3	0	2	2	1	0	2	2	2	1	0	0	0	20	0	0	0	2	2	2	2	4	0
3016	0	1	0	1	3	0	2	2	1	0	2	2	2	1	0	0	0	20	0	0	0	2	2	2	2	4	0
3029	1	1	0	1	1	1	2	2	0	1	1	2	2	1	0	0	1	20	0	0	1	2	2	2	2	4	1
3098	0	1	0	1	3	0	2	2	1	1	2	2	2	1	1	0	0	20	0	0	1	2	2	2	2	4	1
3156	1	1	0	1	0	0	2	2	1	0	1	2	2	1	0	0	1	20	0	0	1	2	2	2	2	4	1
3187	1	1	0	1	1	1	2	2	0	1	1	2	2	1	0	0	1	20	0	0	1	2	2	2	2	4	1
3232	1	1	0	1	0	0	3	3	0	0	2	3	4	1	1	0	0	20	0	0	1	3	3	3	3	6	1
3238	1	1	0	1	0	0	3	3	0	0	2	3	3	1	1	0	0	20	0	0	1	3	3	3	3	6	1
3271	0	1	0	1	3	0	2	2	1	0	2	2	2	1	1	0	0	20	0	0	1	2	2	2	2	4	1
3289	0	1	0	1	0	0	3	2	1	1	2	3	3	1	0	0	1	20	0	0	1	3	2	3	3	6	1
3302	0	1	0	1	3	0	2	2	0	1	1	2	2	1	1	0	0	20	0	0	1	2	2	2	2	4	1
3316	1	1	0	1	1	1	2	2	0	1	1	2	2	1	0	0	1	20	0	0	1	2	2	2	2	4	1
3382	1	1	0	1	3	0	2	2	0	1	1	2	2	1	1	0	0	20	0	0	1	2	2	2	2	4	1
3416	0	1	0	1	0	0	3	2	1	1	2	3	3	1	0	0	1	20	0	0	1	3	2	3	3	6	1
3424	0	1	0	1	0	0	3	2	1	1	2	3	3	1	0	0	1	20	0	0	1	3	2	3	3	6	1
3445	0	1	0	1	3	0	2	2	0	1	1	2	2	1	1	0	0	20	0	0	1	2	2	2	2	4	1
3491	0	1	0	1	3	0	1	2	1	0	2	1	1	1	0	0	0	20	0	0	0	1	2	1	1	2	0
3500	0	1	0	1	3	0	2	2	1	0	2	2	2	1	0	0	0	20	0	0	0	2	2	2	2	4	0
3544	0	1	0	1	3	0	2	2	1	0	1	2	2	1	1	0	0	20	0	0	1	2	2	2	2	4	1
3566	0	1	0	1	1	0	1	1	1	1	1	2	2	1	0	0	1	14	0	0	1	1	1	2	2	4	1
3574	0	1	0	1	3	0	3	1	1	1	2	3	3	1	1	0	0	20	0	0	1	3	1	3	3	6	1
3600	1	1	0	1	3	0	2	2	0	1	1	2	2	1	1	0	0	20	0	0	1	2	2	2	2	4	1
3608	1	1	0	1	1	1	2	2	0	1	1	2	2	1	0	0	1	20	0	0	1	2	2	2	2	4	1
3652	0	1	0	1	0	0	1	2	0	1	2	2	2	1	0	0	0	20	0	0	0	1	2	2	2	4	0
3671	1	1	0	1	0	0	2	2	1	0	1	2	2	1	0	0	1	20	0	0	1	2	2	2	2	4	1
3740	1	1	0	1	0	0	3	3	0	0	2	3	3	1	1	0	0	20	0	0	1	3	3	3	3	6	1
3752	0	1	0	1	0	0	2	2	0	1	2	2	2	1	1	0	0	20	0	0	1	2	2	2	2	4	1
3767	1	1	0	1	1	1	2	2	0	1	1	2	2	1	0	0	1	20	0	0	1	2	2	2	2	4	1
3768	1	1	0	1	1	1	2	2	0	1	1	2	2	1	0	0	1	20	0	0	1	2	2	2	2	4	1
3771	0	1	0	1	3	0	2	2	1	0	2	2	2	1	0	0	0	20	0	0	0	2	2	2	2	4	0
3778	1	1	0	1	1	1	2	2	0	1	1	2	2	1	0	0	1	20	0	0	1	2	2	2	2	4	1
3783	1	1	0	1	1	1	2	2	0	1	1	2	2	1	0	0	1	20	0	0	1	2	2	2	2	4	1
3788	0	1	0	1	3	0	3	2	1	0	2	3	3	1	0	0	0	20	0	0	0	3	2	3	3	6	0
3812	1	1	0	1	1	1	2	2	0	1	1	2	2	1	0	0	1	20	0	0	1	2	2	2	2	4	1
3820	0	1	0	1	0	1	1	1	1	1	2	2	2	1	0	0	0	20	0	0	0	1	1	2	2	4	0
3826	1	1	0	1	0	1	2	2	0	0	2	2	2	1	1	0	0	20	0	0	1	2	2	2	2	4	1
3827	1	1	0	1	1	1	2	2	0	1	1	2	2	1	0	0	1	20	0	0	1	2	2	2	2	4	1
3828	1	1	0	1	3	0	2	2	1	1	1	2	2	1	1	0	0	20	0	0	1	2	2	2	2	4	1
3837	0	1	0	1	0	1	2	2	0	1	1	2	2	1	0	0	0	20	0	0	0	2	2	2	2	4	0
3842	0	1	0	1	3	0	2	2	1	0	2	2	2	1	0	0	0	20	0	0	0	2	2	2	2	4	0
3846	0	1	0	1	0	0	3	2	1	1	2	3	3	1	0	0	1	20	0	0	1	3	2	3	3	6	1
3879	0	1	0	1	1	1	2	2	0	1	0	2	2	1	1	0	0	20	0	0	1	2	2	2	2	4	1
3881	1	1	0	1	0	0	2	2	1	0	1	2	2	1	0	0	1	20	0	0	1	2	2	2	2	4	1
3953	1	1	0	1	0	0	2	2	0	0	2	2	2	1	1	0	0	20	0	0	1	2	2	2	2	4	1
3975	0	1	0	1	3	0	2	2	1	0	2	2	2	1	1	0	0	20	0	0	1	2	2	2	2	4	1
3992	0	1	0	1	1	0	2	2	1	0	2	2	2	1	0	0	0	20	0	0	0	2	2	2	2	4	0
4010	1	1	0	1	0	0	2	3	0	0	2	3	2	1	1	0	0	20	0	0	1	2	3	3	2	5	1
4016	0	1	0	1	0	1	1	1	1	1	2	2	2	1	0	0	0	20	0	0	0	1	1	2	2	4	0
4040	0	1	0	1	0	0	3	2	1	1	2	3	3	1	0	0	1	20	0	0	1	3	2	3	3	6	1
4056	1	1	0	1	3	0	2	2	0	1	1	2	2	1	1	0	0	20	0	0	1	2	2	2	2	4	1
4059	1	1	0	1	0	0	2	3	0	0	2	3	4	1	1	0	0	20	0	0	1	2	3	3	3	6	1
4109	1	1	0	1	1	1	2	2	0	1	1	2	2	1	0	0	1	20	0	0	1	2	2	2	2	4	1
4114	0	1	0	1	3	0	3	2	1	0	2	3	3	1	0	0	0	20	0	0	0	3	2	3	3	6	0
4122	0	1	0	1	1	0	2	2	1	0	2	2	2	1	0	0	0	20	0	0	0	2	2	2	2	4	0
4170	1	1	0	1	3	0	2	2	0	1	1	2	2	1	1	0	0	20	0	0	1	2	2	2	2	4	1
4197	0	1	0	1	0	0	2	2	0	1	2	2	2	1	1	0	0	20	0	0	1	2	2	2	2	4	1
4218	0	1	0	1	3	0	2	2	1	0	2	2	2	1	1	0	0	20	0	0	1	2	2	2	2	4	1
4225	0	1	0	1	3	0	1	2	1	0	2	1	1	1	0	0	0	20	0	0	0	1	2	1	1	2	0
4248	0	1	0	1	0	0	1	2	0	1	2	2	2	1	0	0	0	20	0	0	0	1	2	2	2	4	0
4255	1	1	0	1	1	1	2	2	0	1	1	2	2	1	0	0	1	20	0	0	1	2	2	2	2	4	1
4277	0	1	0	1	3	0	2	2	1	1	2	2	2	1	1	0	0	20	0	0	1	2	2	2	2	4	1
4291	0	1	0	1	3	0	2	2	1	0	2	2	2	1	0	0	0	20	0	0	0	2	2	2	2	4	0
4292	0	1	0	1	3	0	1	2	1	0	2	1	1	1	0	0	0	20	0	0	0	1	2	1	1	2	0
4301	0	1	0	1	0	0	2	2	0	1	2	2	2	1	0	0	0	20	0	0	0	2	2	2	2	4	0
4315	0	1	0	1	3	0	2	2	1	0	2	2	2	1	1	0	0	20	0	0	1	2	2	2	2	4	1
4323	0	1	0	1	0	0	2	2	0	1	2	2	2	1	0	0	0	20	0	0	0	2	2	2	2	4	0
4342	0	1	0	1	3	0	2	2	1	0	1	2	2	1	1	0	0	20	0	0	1	2	2	2	2	4	1
4366	0	1	0	1	3	0	2	2	1	1	2	2	2	1	1	0	0	20	0	0	1	2	2	2	2	4	1
4377	1	1	0	1	0	0	2	2	1	0	1	2	2	1	0	0	1	20	0	0	1	2	2	2	2	4	1
4416	1	1	0	1	1	1	2	2	0	1	1	2	2	1	0	0	1	20	0	0	1	2	2	2	2	4	1
4459	0	1	0	1	3	0	2	2	1	1	2	2	2	1	1	0	0	20	0	0	1	2	2	2	2	4	1
4475	1	1	0	1	3	0	2	2	0	1	1	2	2	1	1	0	0	20	0	0	1	2	2	2	2	4	1
4538	0	1	0	1	3	0	2	2	1	1	2	2	2	1	1	0	0	20	0	0	1	2	2	2	2	4	1
4572	1	1	0	1	0	0	2	2	1	0	1	2	2	1	0	0	1	20	0	0	1	2	2	2	2	4	1
4601	0	1	0	1	0	0	3	2	1	1	2	3	3	1	0	0	1	20	0	0	1	3	2	3	3	6	1
4603	1	1	0	1	0	0	3	3	0	1	2	3	3	1	1	0	0	20	0	0	1	3	3	3	3	6	1
4615	1	1	0	1	1	1	2	2	0	1	1	2	2	1	0	0	1	20	0	0	1	2	2	2	2	4	1
4626	0	1	0	1	3	0	2	2	1	0	2	2	2	1	0	0	0	20	0	0	0	2	2	2	2	4	0
4697	0	1	0	1	1	0	2	2	0	0	2	2	2	1	0	0	0	20	0	0	0	2	2	2	2	4	0
4716	0	1	0	1	0	1	1	1	1	1	2	2	2	1	0	0	0	20	0	0	0	1	1	2	2	4	0
4764	0	1	0	1	3	0	1	2	1	0	2	1	1	1	0	0	0	20	0	0	0	1	2	1	1	2	0
4790	0	1	0	1	3	0	2	2	0	1	1	2	2	1	1	0	0	20	0	0	1	2	2	2	2	4	1
4791	0	1	0	1	0	0	3	2	1	1	2	3	3	1	0	0	1	20	0	0	1	3	2	3	3	6	1
4800	1	1	0	1	0	0	2	2	1	0	1	2	2	1	0	0	1	20	0	0	1	2	2	2	2	4	1
4805	0	1	0	1	0	0	3	2	1	1	2	3	3	1	0	0	1	20	0	0	1	3	2	3	3	6	1
4823	0	1	0	1	3	0	3	2	0	1	2	3	3	1	0	0	1	20	0	0	1	3	2	3	3	6	1
4824	0	1	0	1	3	0	2	2	1	0	1	2	2	1	1	0	0	20	0	0	1	2	2	2	2	4	1
4827	0	1	0	1	1	0	2	2	0	0	2	2	2	1	0	0	0	20	0	0	0	2	2	2	2	4	0
4836	0	1	0	1	0	0	2	2	0	1	2	2	2	1	0	0	0	20	0	0	0	2	2	2	2	4	0
4846	0	1	0	1	0	1	4	1	1	1	2	4	3	1	0	0	0	20	0	0	0	3	1	3	3	6	0
4847	0	1	0	1	3	0	3	1	1	1	2	3	3	1	1	0	0	20	0	0	1	3	1	3	3	6	1
4855	0	1	0	1	3	0	2	2	1	0	2	2	2	1	1	0	0	20	0	0	1	2	2	2	2	4	1
4925	0	1	0	1	3	0	2	2	1	0	2	2	2	1	0	0	0	20	0	0	0	2	2	2	2	4	0
4948	0	1	0	1	3	0	1	2	1	0	2	1	1	1	0	0	0	20	0	0	0	1	2	1	1	2	0
4972	1	1	0	1	0	0	1	2	0	0	2	2	4	1	1	0	0	20	0	0	1	1	2	2	3	5	1
5045	0	1	0	1	3	0	2	2	1	0	2	2	2	1	0	0	0	20	0	0	0	2	2	2	2	4	0
5063	0	1	0	1	3	0	2	2	1	0	2	2	2	1	0	0	0	20	0	0	0	2	2	2	2	4	0
5069	0	1	0	1	0	0	3	2	1	1	2	3	3	1	0	0	1	20	0	0	1	3	2	3	3	6	1
5073	1	1	0	1	0	0	3	3	0	0	2	3	4	1	1	0	0	20	0	0	1	3	3	3	3	6	1
5077	0	1	0	1	3	0	3	2	1	0	2	3	3	1	0	0	0	20	0	0	0	3	2	3	3	6	0
5081	1	1	0	1	0	0	3	4	0	0	2	2	4	1	1	0	0	20	0	0	1	3	3	2	3	5	1
5112	0	1	0	1	3	0	1	2	1	0	2	1	1	1	0	0	0	20	0	0	0	1	2	1	1	2	0
5149	1	1	0	1	0	0	3	3	0	1	2	3	3	1	1	0	0	20	0	0	1	3	3	3	3	6	1
5211	1	1	0	1	0	0	1	2	0	0	2	2	4	1	1	0	0	20	0	0	1	1	2	2	3	5	1
5218	0	1	0	1	3	0	4	2	1	0	2	4	3	1	0	0	0	20	0	0	0	3	2	3	3	6	0
5225	1	1	0	1	0	0	2	2	1	0	1	2	2	1	0	0	1	20	0	0	1	2	2	2	2	4	1
5226	0	1	0	1	0	1	2	2	0	1	1	2	2	1	0	0	0	20	0	0	0	2	2	2	2	4	0
5263	0	1	0	1	3	0	2	2	1	0	2	2	2	1	0	0	0	20	0	0	0	2	2	2	2	4	0
5266	0	1	0	1	3	0	2	2	1	0	2	2	2	1	0	0	0	20	0	0	0	2	2	2	2	4	0
5273	0	1	0	1	3	0	3	1	1	1	2	3	3	1	1	0	0	20	0	0	1	3	1	3	3	6	1
5302	1	1	0	1	1	1	2	2	0	1	1	2	2	1	0	0	1	20	0	0	1	2	2	2	2	4	1
5356	0	1	0	1	0	0	3	2	1	1	2	3	3	1	0	0	1	20	0	0	1	3	2	3	3	6	1
5374	0	1	0	1	1	0	2	2	0	0	2	2	2	1	0	0	0	20	0	0	0	2	2	2	2	4	0
5395	0	1	0	1	3	0	2	2	0	1	1	2	2	1	1	0	0	20	0	0	1	2	2	2	2	4	1
5437	0	1	0	1	0	0	3	2	1	1	2	3	3	1	0	0	1	20	0	0	1	3	2	3	3	6	1
5439	0	1	0	1	0	0	1	2	0	1	2	2	2	1	0	0	0	20	0	0	0	1	2	2	2	4	0
5505	0	1	0	1	3	0	2	2	0	1	1	2	2	1	1	0	0	20	0	0	1	2	2	2	2	4	1
5528	0	1	0	1	1	0	2	2	0	0	2	2	2	1	0	0	0	20	0	0	0	2	2	2	2	4	0
5565	1	1	0	1	1	1	2	2	0	1	1	2	2	1	0	0	1	20	0	0	1	2	2	2	2	4	1
5573	0	1	0	1	3	0	2	2	1	1	2	2	2	1	1	0	0	20	0	0	1	2	2	2	2	4	1
5579	0	1	0	1	3	0	2	2	1	0	2	2	2	1	1	0	0	20	0	0	1	2	2	2	2	4	1
5617	1	1	0	1	0	0	2	2	1	0	1	2	2	1	0	0	1	20	0	0	1	2	2	2	2	4	1
5650	0	1	0	1	3	0	2	2	1	1	2	2	2	1	1	0	0	20	0	0	1	2	2	2	2	4	1
5661	1	1	0	1	1	1	2	2	0	1	1	2	2	1	0	0	1	20	0	0	1	2	2	2	2	4	1
5688	1	1	0	1	3	0	2	2	1	1	1	2	2	1	1	0	0	20	0	0	1	2	2	2	2	4	1
5734	0	1	0	1	3	0	2	2	1	0	2	2	2	1	1	0	0	20	0	0	1	2	2	2	2	4	1
5816	1	1	0	1	0	0	2	1	0	0	2	2	2	1	1	0	0	20	0	0	1	2	1	2	2	4	1
5829	0	1	0	1	3	0	3	2	1	0	2	3	3	1	0	0	0	20	0	0	0	3	2	3	3	6	0
5842	0	1	0	1	3	0	2	2	1	0	2	2	2	1	1	0	0	20	0	0	1	2	2	2	2	4	1
5854	0	1	0	1	0	1	3	1	0	0	0	3	2	1	1	0	0	20	0	0	1	3	1	3	2	5	1
5865	0	1	0	1	3	0	2	2	0	1	1	2	2	1	1	0	0	20	0	0	1	2	2	2	2	4	1
5881	0	1	0	1	0	0	3	2	1	1	2	3	3	1	0	0	1	20	0	0	1	3	2	3	3	6	1
5896	0	1	0	1	3	0	2	2	1	0	2	2	2	1	0	0	0	20	0	0	0	2	2	2	2	4	0
5912	0	1	0	1	1	0	2	2	1	0	2	2	2	1	0	0	0	20	0	0	0	2	2	2	2	4	0
6386	1	1	0	1	3	0	2	2	0	1	1	2	2	2	1	0	0	20	0	0	1	2	2	2	2	4	1
6407	0	1	0	1	3	0	2	2	0	1	1	2	2	2	1	0	0	20	0	0	1	2	2	2	2	4	1
6410	1	1	0	1	0	0	3	3	0	1	2	3	2	2	1	0	0	20	0	0	1	3	3	3	2	5	1
6430	1	1	0	1	0	0	2	2	0	0	2	2	2	2	1	0	0	20	0	0	1	2	2	2	2	4	1
6438	0	1	0	1	3	0	2	2	1	0	2	2	2	2	0	0	0	20	0	0	0	2	2	2	2	4	0
6442	0	1	0	1	3	0	2	2	0	1	1	2	2	2	1	0	0	20	0	0	1	2	2	2	2	4	1
6453	0	1	0	1	3	0	2	2	1	0	2	2	2	2	0	0	0	20	0	0	0	2	2	2	2	4	0
6463	0	1	0	1	3	0	2	2	1	0	2	2	2	2	0	0	0	20	0	0	0	2	2	2	2	4	0
6478	0	1	0	1	1	1	2	2	0	1	0	2	2	2	1	0	0	20	0	0	1	2	2	2	2	4	1
6495	0	1	0	1	0	0	2	2	0	1	2	2	2	2	0	0	0	20	0	0	0	2	2	2	2	4	0
6513	1	1	0	1	1	1	2	2	0	1	1	2	2	2	0	0	1	20	0	0	1	2	2	2	2	4	1
6708	1	1	0	1	0	0	2	2	1	0	1	2	2	3	0	0	1	20	0	0	1	2	2	2	2	4	1
6716	0	1	0	1	3	1	2	2	0	0	2	2	2	3	1	0	0	20	0	0	1	2	2	2	2	4	1
20	0	2	0	1	4	1	2	1	1	1	2	2	2	1	0	1	0	20	0	0	1	2	1	2	2	4	1
86	0	2	0	1	3	1	3	2	0	1	1	3	2	1	0	0	1	20	0	1	1	3	2	3	2	5	1
140	0	2	0	1	3	0	2	2	1	0	2	2	2	1	0	0	0	20	0	1	0	2	2	2	2	4	0
190	0	2	0	1	3	0	1	2	1	1	2	2	2	1	1	0	0	19	0	1	1	1	2	2	2	4	1
263	0	2	0	1	3	0	1	2	1	1	1	2	2	1	1	0	0	20	0	1	1	1	2	2	2	4	1
278	0	2	0	1	3	0	1	2	1	1	2	2	2	1	1	0	0	20	0	1	1	1	2	2	2	4	1
378	1	2	0	1	0	1	2	2	0	1	2	2	2	1	1	0	0	20	0	1	1	2	2	2	2	4	1
403	1	2	0	1	4	0	3	2	1	1	1	2	1	1	0	1	0	20	0	1	1	3	2	2	1	3	1
410	0	2	0	1	3	0	1	2	1	1	1	2	2	1	0	1	0	20	0	1	1	1	2	2	2	4	1
430	0	2	0	1	3	0	2	2	1	0	2	2	2	1	0	0	0	20	0	1	0	2	2	2	2	4	0
487	0	2	0	1	4	0	3	1	1	1	2	3	2	1	0	1	0	20	0	1	1	3	1	3	2	5	1
497	0	2	0	1	3	0	1	2	1	0	1	2	2	1	0	1	0	20	0	1	1	1	2	2	2	4	1
583	0	2	0	1	3	0	1	2	1	1	1	2	2	1	0	1	0	20	0	1	1	1	2	2	2	4	1
609	0	2	0	1	3	0	1	2	1	1	2	2	2	1	1	0	0	20	0	1	1	1	2	2	2	4	1
650	0	2	0	1	3	0	2	2	1	0	2	2	2	1	0	0	0	20	0	1	0	2	2	2	2	4	0
712	1	2	0	1	0	1	2	2	0	1	2	2	2	1	1	0	0	20	0	1	1	2	2	2	2	4	1
1021	0	2	0	1	3	0	1	2	1	1	1	2	2	1	1	0	0	20	0	1	1	1	2	2	2	4	1
1041	0	2	0	1	3	0	1	2	1	0	1	2	2	1	0	1	0	20	0	1	1	1	2	2	2	4	1
1057	0	2	0	1	4	0	3	1	1	1	2	3	2	1	0	1	0	20	0	1	1	3	1	3	2	5	1
1062	0	2	0	1	3	0	1	2	1	1	2	2	2	1	1	0	0	20	0	1	1	1	2	2	2	4	1
1119	0	2	0	1	2	0	1	2	1	0	2	2	2	1	0	0	0	20	0	1	0	1	2	2	2	4	0
1255	1	2	0	1	0	1	2	2	0	1	2	2	2	1	1	0	0	20	0	1	1	2	2	2	2	4	1
1561	0	2	0	1	3	0	2	2	1	0	2	2	2	1	0	0	0	20	0	0	0	2	2	2	2	4	0
1565	0	2	0	1	3	1	3	2	0	1	1	3	2	1	0	0	1	20	0	0	1	3	2	3	2	5	1
1575	0	2	0	1	3	0	2	2	1	0	2	2	2	1	0	0	0	20	0	0	0	2	2	2	2	4	0
1579	0	2	0	1	3	0	1	2	1	1	1	2	2	1	1	0	0	20	0	0	1	1	2	2	2	4	1
1592	0	2	0	1	0	0	1	2	0	1	2	2	2	1	1	0	0	20	0	0	1	1	2	2	2	4	1
1618	0	2	0	1	3	1	3	2	0	1	1	3	2	1	0	0	1	20	0	0	1	3	2	3	2	5	1
1627	1	2	0	1	4	0	2	2	1	1	1	2	1	1	0	1	0	20	0	0	1	2	2	2	1	3	1
1728	0	2	0	1	3	0	1	2	1	1	1	2	2	1	1	0	0	20	0	0	1	1	2	2	2	4	1
1731	0	2	0	1	3	0	1	2	1	0	1	2	2	1	0	1	0	20	0	0	1	1	2	2	2	4	1
1772	0	2	0	1	3	0	1	2	1	1	2	2	2	1	1	0	0	20	0	0	1	1	2	2	2	4	1
1800	0	2	0	1	0	0	1	2	0	1	2	2	2	1	1	0	0	20	0	0	1	1	2	2	2	4	1
1841	0	2	0	1	3	0	1	2	1	1	1	2	2	1	1	0	0	20	0	0	1	1	2	2	2	4	1
1883	0	2	0	1	3	0	2	2	1	0	2	2	2	1	0	0	0	20	0	0	0	2	2	2	2	4	0
1966	0	2	0	1	4	0	3	1	1	1	2	3	2	1	0	1	0	20	0	0	1	3	1	3	2	5	1
1982	0	2	0	1	3	0	1	2	1	0	1	2	2	1	0	1	0	20	0	0	1	1	2	2	2	4	1
1993	0	2	0	1	3	1	3	2	0	1	1	3	2	1	0	0	1	20	0	0	1	3	2	3	2	5	1
2010	0	2	0	1	3	0	1	2	1	0	1	2	2	1	0	1	0	20	0	0	1	1	2	2	2	4	1
2017	0	2	0	1	3	0	1	2	1	1	2	2	2	1	1	0	0	19	0	0	1	1	2	2	2	4	1
2020	1	2	0	1	0	1	2	2	0	1	2	2	2	1	1	0	0	20	0	0	1	2	2	2	2	4	1
2022	0	2	0	1	4	0	3	1	1	1	2	3	2	1	0	1	0	20	0	0	1	3	1	3	2	5	1
2083	0	2	0	1	3	0	1	2	1	1	2	2	2	1	1	0	0	20	0	0	1	1	2	2	2	4	1
2138	1	2	0	1	0	1	2	2	0	1	2	2	2	1	1	0	0	20	0	0	1	2	2	2	2	4	1
2208	0	2	0	1	3	0	1	2	1	1	1	2	2	1	1	0	0	20	0	0	1	1	2	2	2	4	1
2249	0	2	0	1	4	0	3	1	1	1	2	3	2	1	0	1	0	20	0	0	1	3	1	3	2	5	1
2255	1	2	0	1	4	0	2	2	1	0	1	2	1	1	0	1	0	20	0	0	1	2	2	2	1	3	1
2279	0	2	0	1	3	0	1	2	1	0	1	2	2	1	0	1	0	20	0	0	1	1	2	2	2	4	1
2281	0	2	0	1	3	0	1	2	1	1	2	2	2	1	1	0	0	20	0	0	1	1	2	2	2	4	1
2286	0	2	0	1	3	0	1	2	1	1	2	2	2	1	1	0	0	20	0	0	1	1	2	2	2	4	1
2325	0	2	0	1	3	0	1	2	1	1	1	2	2	1	1	0	0	20	0	0	1	1	2	2	2	4	1
2367	0	2	0	1	3	0	2	2	1	0	2	2	2	1	0	0	0	20	0	0	0	2	2	2	2	4	0
2378	0	2	0	1	3	0	1	2	1	1	1	2	2	1	1	0	0	20	0	0	1	1	2	2	2	4	1
2558	0	2	0	1	4	0	3	1	1	1	2	3	2	1	0	1	0	20	0	0	1	3	1	3	2	5	1
2559	0	2	0	1	3	0	1	2	1	1	2	2	2	1	1	0	0	20	0	0	1	1	2	2	2	4	1
2600	0	2	0	1	3	0	1	2	1	1	1	2	2	1	1	0	0	20	0	0	1	1	2	2	2	4	1
2686	0	2	0	1	3	0	2	2	1	0	2	2	2	1	0	0	0	20	0	0	0	2	2	2	2	4	0
2711	0	2	0	1	3	0	1	2	1	1	1	2	2	1	1	0	0	20	0	0	1	1	2	2	2	4	1
2712	0	2	0	1	3	0	1	2	1	1	2	2	2	1	1	0	0	20	0	0	1	1	2	2	2	4	1
2750	0	2	0	1	3	0	2	2	1	0	2	2	2	1	0	0	0	20	0	0	0	2	2	2	2	4	0
2771	1	2	0	1	0	1	2	2	0	1	2	2	2	1	1	0	0	20	0	0	1	2	2	2	2	4	1
2793	0	2	0	1	3	0	2	2	1	0	2	2	2	1	0	0	0	20	0	0	0	2	2	2	2	4	0
2822	0	2	0	1	3	0	2	2	1	0	2	2	2	1	0	0	0	20	0	0	0	2	2	2	2	4	0
2884	0	2	0	1	4	0	3	1	1	1	2	3	2	1	0	1	0	20	0	0	1	3	1	3	2	5	1
2888	0	2	0	1	3	0	1	2	1	0	1	2	2	1	0	1	0	20	0	0	1	1	2	2	2	4	1
2940	0	2	0	1	3	0	1	2	1	1	2	2	2	1	1	0	0	20	0	0	1	1	2	2	2	4	1
2964	0	2	0	1	3	0	1	2	1	0	1	2	2	1	0	1	0	20	0	0	1	1	2	2	2	4	1
3054	0	2	0	1	0	0	1	2	0	1	2	2	2	1	1	0	0	20	0	0	1	1	2	2	2	4	1
3178	0	2	0	1	3	1	3	2	0	1	1	3	2	1	0	0	1	20	0	0	1	3	2	3	2	5	1
3259	0	2	0	1	3	0	1	2	1	1	1	2	2	1	1	0	0	20	0	0	1	1	2	2	2	4	1
3434	0	2	0	1	3	1	3	2	0	1	1	3	2	1	0	0	1	20	0	0	1	3	2	3	2	5	1
3466	0	2	0	1	3	0	2	2	1	0	2	2	2	1	0	0	0	20	0	0	0	2	2	2	2	4	0
3510	0	2	0	1	3	0	1	2	1	0	1	2	2	1	0	1	0	20	0	0	1	1	2	2	2	4	1
3516	0	2	0	1	3	1	3	2	0	1	1	3	2	1	0	0	1	20	0	0	1	3	2	3	2	5	1
3585	1	2	0	1	0	1	2	2	0	1	2	2	2	1	1	0	0	20	0	0	1	2	2	2	2	4	1
3596	0	2	0	1	3	0	2	2	1	0	2	2	2	1	0	0	0	20	0	0	0	2	2	2	2	4	0
3609	1	2	0	1	4	0	2	2	1	1	1	2	1	1	0	1	0	20	0	0	1	2	2	2	1	3	1
3672	0	2	0	1	3	0	1	2	1	1	2	2	2	1	1	0	0	20	0	0	1	1	2	2	2	4	1
3712	0	2	0	1	0	1	2	2	0	1	2	2	2	1	1	0	0	20	0	0	1	2	2	2	2	4	1
3795	1	2	0	1	0	1	2	2	0	1	2	2	2	1	1	0	0	20	0	0	1	2	2	2	2	4	1
3796	0	2	0	1	4	0	3	1	1	1	2	3	2	1	0	1	0	20	0	0	1	3	1	3	2	5	1
3840	0	2	0	1	0	1	1	2	0	1	2	2	2	1	1	0	0	20	0	0	1	1	2	2	2	4	1
3936	0	2	0	1	3	0	1	2	1	1	2	2	2	1	1	0	0	20	0	0	1	1	2	2	2	4	1
3971	0	2	0	1	3	0	1	2	1	0	1	2	2	1	0	1	0	20	0	0	1	1	2	2	2	4	1
4136	0	2	0	1	3	0	2	2	1	0	2	2	2	1	0	0	0	20	0	0	0	2	2	2	2	4	0
4172	0	2	0	1	3	0	1	2	1	1	1	2	2	1	1	0	0	20	0	0	1	1	2	2	2	4	1
4385	0	2	0	1	3	0	1	2	1	1	2	2	2	1	1	0	0	20	0	0	1	1	2	2	2	4	1
4419	0	2	0	1	3	0	1	2	1	1	1	2	2	1	1	0	0	20	0	0	1	1	2	2	2	4	1
4424	0	2	0	1	3	0	1	2	1	1	1	2	2	1	1	0	0	20	0	0	1	1	2	2	2	4	1
4464	0	2	0	1	3	0	1	2	1	1	1	2	2	1	0	1	0	20	0	0	1	1	2	2	2	4	1
4511	0	2	0	1	3	0	1	2	1	1	1	2	2	1	0	1	0	20	0	0	1	1	2	2	2	4	1
4592	0	2	0	1	3	0	1	2	1	0	1	2	2	1	0	1	0	20	0	0	1	1	2	2	2	4	1
4738	1	2	0	1	0	1	2	2	0	1	2	2	2	1	1	0	0	20	0	0	1	2	2	2	2	4	1
4784	0	2	0	1	4	0	3	2	1	1	2	2	1	1	0	1	0	20	0	0	1	3	2	2	1	3	1
4796	0	2	0	1	4	0	3	1	1	1	2	3	2	1	0	1	0	20	0	0	1	3	1	3	2	5	1
4889	0	2	0	1	3	0	1	2	1	0	1	2	2	1	0	1	0	20	0	0	1	1	2	2	2	4	1
4930	0	2	0	1	3	0	1	2	1	1	1	2	2	1	1	0	0	20	0	0	1	1	2	2	2	4	1
4978	0	2	0	1	4	0	3	1	1	1	2	3	2	1	0	1	0	20	0	0	1	3	1	3	2	5	1
5078	0	2	0	1	3	0	1	2	1	1	2	2	2	1	1	0	0	20	0	0	1	1	2	2	2	4	1
5177	0	2	0	1	3	0	1	2	1	1	2	2	2	1	1	0	0	20	0	0	1	1	2	2	2	4	1
5197	0	2	0	1	3	0	1	2	1	1	1	2	2	1	0	1	0	20	0	0	1	1	2	2	2	4	1
5205	0	2	0	1	4	0	3	2	1	1	2	2	1	1	0	1	0	20	0	0	1	3	2	2	1	3	1
5275	0	2	0	1	3	0	1	2	1	0	1	2	2	1	0	1	0	20	0	0	1	1	2	2	2	4	1
5327	0	2	0	1	3	0	2	2	1	0	2	2	2	1	0	0	0	20	0	0	0	2	2	2	2	4	0
5335	0	2	0	1	3	0	1	2	1	1	2	2	2	1	1	0	0	20	0	0	1	1	2	2	2	4	1
5351	1	2	0	1	0	1	2	2	0	1	2	2	2	1	1	0	0	20	0	0	1	2	2	2	2	4	1
5407	0	2	0	1	3	0	2	2	1	0	2	2	2	1	0	0	0	20	0	0	0	2	2	2	2	4	0
5491	0	2	0	1	3	0	2	2	1	0	2	2	2	1	0	0	0	20	0	0	0	2	2	2	2	4	0
5529	0	2	0	1	3	0	1	2	1	1	2	2	2	1	1	0	0	20	0	0	1	1	2	2	2	4	1
5570	0	2	0	1	3	0	1	2	1	1	2	2	2	1	1	0	0	20	0	0	1	1	2	2	2	4	1
5589	0	2	0	1	3	0	2	2	1	0	2	2	2	1	0	0	0	20	0	0	0	2	2	2	2	4	0
5600	0	2	0	1	4	0	3	1	1	1	2	3	2	1	0	1	0	20	0	0	1	3	1	3	2	5	1
5611	0	2	0	1	3	0	1	2	1	1	2	2	2	1	1	0	0	20	1	0	1	1	2	2	2	4	2
5672	0	2	0	1	3	0	1	2	1	1	2	2	2	1	1	0	0	20	0	0	1	1	2	2	2	4	1
5682	0	2	0	1	3	0	1	2	1	1	2	2	2	1	1	0	0	20	0	0	1	1	2	2	2	4	1
5739	0	2	0	1	3	0	2	2	0	0	2	2	2	1	1	0	0	20	0	0	1	2	2	2	2	4	1
5773	0	2	0	1	3	0	1	2	1	0	1	2	2	1	0	1	0	20	0	0	1	1	2	2	2	4	1
5819	0	2	0	1	0	0	1	2	0	1	2	2	2	1	1	0	0	20	0	0	1	1	2	2	2	4	1
5905	0	2	0	1	3	0	2	2	1	0	2	2	2	1	0	0	0	20	0	0	0	2	2	2	2	4	0
5913	0	2	0	1	3	0	1	2	1	0	1	2	2	1	0	1	0	20	0	0	1	1	2	2	2	4	1
2	1	3	0	1	0	0	2	1	0	0	2	2	2	1	0	0	0	20	0	0	0	2	1	2	2	4	0
3	1	3	0	1	0	0	2	1	0	0	2	2	2	1	0	0	0	20	0	0	0	2	1	2	2	4	0
5	1	3	0	1	0	0	2	1	0	0	2	2	2	1	0	0	0	20	0	0	0	2	1	2	2	4	0
6	1	3	0	1	0	0	2	1	0	0	2	2	2	1	0	0	0	20	0	0	0	2	1	2	2	4	0
7	1	3	0	1	0	0	2	1	0	0	2	2	2	1	0	0	0	20	0	0	0	2	1	2	2	4	0
8	1	3	0	1	0	0	2	1	0	0	2	2	2	1	0	0	0	20	0	0	0	2	1	2	2	4	0
10	1	3	0	1	0	0	2	1	0	0	2	2	2	1	0	0	0	20	0	0	0	2	1	2	2	4	0
11	1	3	0	1	0	0	2	1	0	0	2	2	2	1	0	0	0	20	0	0	0	2	1	2	2	4	0
12	1	3	0	1	0	0	2	2	0	0	2	2	1	1	0	0	0	20	0	0	0	2	2	2	1	3	0
13	1	3	0	1	0	0	2	1	0	0	2	2	2	1	0	0	0	20	0	0	0	2	1	2	2	4	0
14	1	3	0	1	0	0	2	1	0	0	2	2	2	1	0	0	0	20	0	0	0	2	1	2	2	4	0
15	1	3	0	1	0	0	2	1	0	0	2	2	2	1	0	0	0	20	0	0	0	2	1	2	2	4	0
16	1	3	0	1	0	0	2	2	0	0	2	2	2	1	0	0	0	20	0	0	0	2	2	2	2	4	0
17	1	3	0	1	0	0	2	1	0	0	2	2	2	1	0	0	0	20	0	0	0	2	1	2	2	4	0
18	1	3	0	1	0	0	2	1	0	0	2	2	2	1	0	0	0	20	0	0	0	2	1	2	2	4	0
19	1	3	0	1	0	0	2	1	0	0	2	2	2	1	0	0	0	20	0	0	0	2	1	2	2	4	0
21	1	3	0	1	0	0	2	1	0	0	2	2	2	1	0	0	0	20	0	0	0	2	1	2	2	4	0
23	1	3	0	1	0	0	2	1	0	0	2	2	2	1	0	0	0	20	0	0	0	2	1	2	2	4	0
78	0	3	0	1	0	1	1	2	1	1	1	1	2	1	0	0	1	20	0	1	1	1	2	1	2	3	1
131	0	3	0	1	0	0	1	2	0	0	2	1	2	1	0	0	0	20	0	1	0	1	2	1	2	3	0
167	0	3	0	1	3	0	1	2	1	0	2	1	2	1	1	0	0	20	0	1	1	1	2	1	2	3	1
203	0	3	0	1	0	1	1	2	1	1	1	1	2	1	0	0	1	20	0	1	1	1	2	1	2	3	1
220	1	3	0	1	0	0	2	1	0	0	2	2	2	1	0	0	0	20	0	1	0	2	1	2	2	4	0
222	0	3	0	1	3	0	1	2	1	0	2	1	2	1	1	0	0	20	0	1	1	1	2	1	2	3	1
227	1	3	0	1	1	1	1	2	1	1	1	1	2	1	0	0	1	20	0	1	1	1	2	1	2	3	1
238	1	3	0	1	0	0	2	1	0	0	2	2	2	1	0	0	0	20	0	1	0	2	1	2	2	4	0
240	1	3	0	1	2	0	1	1	1	0	2	1	1	1	0	0	0	20	0	1	0	1	1	1	1	2	0
257	0	3	0	1	3	0	1	2	1	0	2	1	2	1	1	0	0	20	0	1	1	1	2	1	2	3	1
271	0	3	0	1	3	0	1	2	1	1	2	1	2	1	1	0	0	20	0	1	1	1	2	1	2	3	1
281	0	3	0	1	0	0	3	2	1	0	2	3	2	1	1	0	0	20	0	1	1	3	2	3	2	5	1
309	1	3	0	1	0	0	2	1	0	0	2	2	2	1	0	0	0	20	0	1	0	2	1	2	2	4	0
349	1	3	0	1	2	0	1	1	1	0	2	1	1	1	0	0	0	20	0	1	0	1	1	1	1	2	0
371	0	3	0	1	0	0	3	2	1	0	2	3	2	1	1	0	0	20	0	1	1	3	2	3	2	5	1
419	1	3	0	1	0	0	2	2	0	0	2	2	2	1	0	0	0	20	0	1	0	2	2	2	2	4	0
425	0	3	0	1	3	0	1	2	1	0	2	1	2	1	1	0	0	20	0	1	1	1	2	1	2	3	1
442	0	3	0	1	1	1	1	2	1	1	1	1	2	1	0	0	1	20	0	1	1	1	2	1	2	3	1
447	0	3	0	1	3	0	1	2	1	1	2	1	2	1	1	0	0	20	0	1	1	1	2	1	2	3	1
449	0	3	0	1	0	0	1	2	0	1	2	1	2	1	1	0	0	20	0	1	1	1	2	1	2	3	1
457	0	3	0	1	3	0	3	3	1	0	2	3	3	1	1	0	0	20	0	1	1	3	3	3	3	6	1
485	1	3	0	1	2	0	1	1	1	0	2	1	1	1	0	0	0	20	0	1	0	1	1	1	1	2	0
514	1	3	0	1	4	0	1	2	1	1	1	1	2	1	0	1	0	20	0	1	1	1	2	1	2	3	1
578	0	3	0	1	3	0	1	2	1	1	2	1	2	1	1	0	0	20	0	1	1	1	2	1	2	3	1
605	1	3	0	1	2	0	1	1	1	0	2	1	1	1	0	0	0	20	0	1	0	1	1	1	1	2	0
627	1	3	0	1	4	0	1	2	1	1	1	1	2	1	0	1	0	20	0	1	1	1	2	1	2	3	1
641	1	3	0	1	4	0	1	2	1	1	1	1	2	1	0	1	0	20	0	1	1	1	2	1	2	3	1
657	0	3	0	1	3	0	1	2	1	0	2	1	2	1	1	0	0	20	0	1	1	1	2	1	2	3	1
660	0	3	0	1	3	0	1	2	1	1	2	1	2	1	1	0	0	20	0	1	1	1	2	1	2	3	1
675	0	3	0	1	4	1	1	2	0	1	1	1	2	1	0	0	1	20	0	1	1	1	2	1	2	3	1
692	0	3	0	1	0	0	3	2	1	0	2	3	2	1	1	0	0	20	0	1	1	3	2	3	2	5	1
694	0	3	0	1	3	0	1	2	1	1	1	1	2	1	1	0	0	20	0	1	1	1	2	1	2	3	1
762	0	3	0	1	1	1	1	2	1	1	1	1	2	1	0	0	1	20	0	1	1	1	2	1	2	3	1
785	0	3	0	1	3	0	1	2	1	1	2	1	2	1	1	0	0	20	0	1	1	1	2	1	2	3	1
790	1	3	0	1	0	0	2	1	0	0	2	2	2	1	0	0	0	20	0	1	0	2	1	2	2	4	0
791	0	3	0	1	0	1	1	2	1	1	1	1	2	1	0	0	1	20	0	1	1	1	2	1	2	3	1
792	1	3	0	1	1	1	1	2	1	1	1	1	2	1	0	0	1	20	0	1	1	1	2	1	2	3	1
808	0	3	0	1	3	0	1	2	1	0	2	1	2	1	0	0	0	20	0	1	0	1	2	1	2	3	0
851	0	3	0	1	3	0	1	2	1	0	1	1	2	1	1	0	0	20	0	1	1	1	2	1	2	3	1
853	1	3	0	1	3	1	1	1	0	1	2	1	1	1	0	0	0	20	0	1	0	1	1	1	1	2	0
854	1	3	0	1	0	0	2	1	0	0	2	2	2	1	0	0	0	20	0	1	0	2	1	2	2	4	0
878	0	3	0	1	3	0	1	2	1	1	2	1	2	1	1	0	0	20	0	1	1	1	2	1	2	3	1
911	0	3	0	1	0	1	1	2	0	0	1	1	2	1	0	0	0	20	0	1	0	1	2	1	2	3	0
953	1	3	0	1	0	0	2	1	0	0	2	2	2	1	1	0	0	20	0	1	1	2	1	2	2	4	1
1031	0	3	0	1	3	0	1	2	1	0	1	1	2	1	1	0	0	20	0	1	1	1	2	1	2	3	1
1040	0	3	0	1	0	0	1	2	0	1	2	1	2	1	1	0	0	20	0	1	1	1	2	1	2	3	1
1111	0	3	0	1	3	0	3	3	1	1	2	3	3	1	1	0	0	20	0	1	1	3	3	3	3	6	1
1171	1	3	0	1	0	0	3	3	1	0	2	3	3	1	0	0	0	20	0	1	0	3	3	3	3	6	0
1182	0	3	0	1	0	1	1	2	0	0	1	1	2	1	0	0	0	20	0	1	0	1	2	1	2	3	0
1183	0	3	0	1	3	0	1	2	1	0	2	1	2	1	1	0	0	20	0	1	1	1	2	1	2	3	1
1207	0	3	0	1	4	1	1	2	0	1	1	1	2	1	0	0	1	20	0	1	1	1	2	1	2	3	1
1213	1	3	0	1	0	0	1	2	0	1	2	2	2	1	0	0	1	16	4	1	1	1	2	2	2	4	5
1230	0	3	0	1	0	1	1	2	0	1	1	1	2	1	0	0	0	20	0	1	0	1	2	1	2	3	0
1232	1	3	0	1	0	0	3	3	1	0	2	3	3	1	0	0	0	20	0	1	0	3	3	3	3	6	0
1237	1	3	0	1	2	0	1	1	1	0	2	1	1	1	0	0	0	20	0	1	0	1	1	1	1	2	0
1395	0	3	0	1	0	0	3	2	1	0	2	3	2	2	1	0	0	20	0	1	1	3	2	3	2	5	1
1512	1	3	0	1	4	0	1	2	1	1	1	1	2	1	0	1	0	20	0	0	1	1	2	1	2	3	1
1572	1	3	0	1	1	1	1	2	1	1	1	1	2	1	0	0	1	20	0	0	1	1	2	1	2	3	1
1639	1	3	0	1	2	1	1	2	1	1	1	1	2	1	0	0	1	20	0	0	1	1	2	1	2	3	1
1670	1	3	0	1	3	0	1	2	0	1	2	2	2	1	0	0	1	20	3	0	1	1	2	2	2	4	4
1714	1	3	0	1	4	0	1	2	1	1	1	1	2	1	0	1	0	20	0	0	1	1	2	1	2	3	1
1753	0	3	0	1	0	0	4	2	1	0	2	3	2	1	1	0	0	20	0	0	1	3	2	3	2	5	1
1757	0	3	0	1	3	0	1	2	1	0	1	1	2	1	1	0	0	20	0	0	1	1	2	1	2	3	1
1783	1	3	0	1	4	0	3	2	1	1	1	2	1	1	0	1	0	20	0	0	1	3	2	2	1	3	1
1788	0	3	0	1	0	0	1	2	0	1	2	1	2	1	1	0	0	20	0	0	1	1	2	1	2	3	1
1793	0	3	0	1	0	0	1	2	0	1	2	1	2	1	1	0	0	20	0	0	1	1	2	1	2	3	1
1871	0	3	0	1	0	0	1	2	0	1	2	1	2	1	1	0	0	20	0	0	1	1	2	1	2	3	1
1876	0	3	0	1	3	0	1	2	1	0	2	1	2	1	1	0	0	20	0	0	1	1	2	1	2	3	1
1902	0	3	0	1	0	0	3	2	1	0	2	3	2	1	1	0	0	20	0	0	1	3	2	3	2	5	1
1944	0	3	0	1	0	0	1	2	0	1	2	1	2	1	1	0	0	20	0	0	1	1	2	1	2	3	1
1952	0	3	0	1	0	1	1	2	1	1	1	1	2	1	0	0	1	20	0	0	1	1	2	1	2	3	1
1961	0	3	0	1	3	0	1	2	1	0	2	1	2	1	0	0	0	20	0	0	0	1	2	1	2	3	0
1979	1	3	0	1	4	0	1	2	1	1	1	1	2	1	0	1	0	20	0	0	1	1	2	1	2	3	1
2008	0	3	0	1	0	1	1	2	1	1	1	1	2	1	0	0	1	20	0	0	1	1	2	1	2	3	1
2035	0	3	0	1	4	1	1	2	1	1	1	1	2	1	0	0	1	20	0	0	1	1	2	1	2	3	1
2044	1	3	0	1	2	0	1	1	1	0	2	1	1	1	0	0	0	20	0	0	0	1	1	1	1	2	0
2048	0	3	0	1	0	1	1	2	1	1	1	1	2	1	0	0	1	20	0	0	1	1	2	1	2	3	1
2061	0	3	0	1	0	0	1	2	0	1	2	1	2	1	1	0	0	20	0	0	1	1	2	1	2	3	1
2095	0	3	0	1	1	1	1	2	1	1	1	1	2	1	0	0	1	20	0	0	1	1	2	1	2	3	1
2115	0	3	0	1	3	0	1	2	1	1	2	1	2	1	1	0	0	20	0	0	1	1	2	1	2	3	1
2145	1	3	0	1	4	0	1	2	1	1	1	1	2	1	0	1	0	20	0	0	1	1	2	1	2	3	1
2171	0	3	0	1	0	1	1	2	0	0	1	1	2	1	0	0	0	20	0	0	0	1	2	1	2	3	0
2183	0	3	0	1	0	1	1	2	1	1	1	1	2	1	0	0	1	20	0	0	1	1	2	1	2	3	1
2215	0	3	0	1	3	0	1	2	1	1	2	1	2	1	0	0	0	20	0	0	0	1	2	1	2	3	0
2235	1	3	0	1	2	0	1	1	1	0	2	1	1	1	0	0	0	20	0	0	0	1	1	1	1	2	0
2435	1	3	0	1	0	0	2	1	0	0	2	2	2	1	1	0	0	20	0	0	1	2	1	2	2	4	1
2454	0	3	0	1	3	0	1	2	1	0	2	1	2	1	1	0	0	20	0	0	1	1	2	1	2	3	1
2485	1	3	0	1	0	0	3	3	1	0	2	3	3	1	0	0	0	20	0	0	0	3	3	3	3	6	0
2492	1	3	0	1	0	0	2	1	0	0	2	2	2	1	1	0	0	20	0	0	1	2	1	2	2	4	1
2494	1	3	0	1	0	0	2	2	0	0	2	2	2	1	0	0	0	20	0	0	0	2	2	2	2	4	0
2538	1	3	0	1	1	1	1	2	1	1	1	1	2	1	0	0	1	20	0	0	1	1	2	1	2	3	1
2580	1	3	0	1	1	1	1	2	1	1	1	1	2	1	0	0	1	20	0	0	1	1	2	1	2	3	1
2617	0	3	0	1	3	0	1	2	1	0	2	1	2	1	0	0	0	20	0	0	0	1	2	1	2	3	0
2643	0	3	0	1	4	0	1	2	1	1	1	1	2	1	0	1	0	20	0	0	1	1	2	1	2	3	1
2673	0	3	0	1	3	0	1	2	1	0	2	1	2	1	0	0	0	20	0	0	0	1	2	1	2	3	0
2785	0	3	0	1	0	1	1	2	0	1	1	1	2	1	0	0	0	20	0	0	0	1	2	1	2	3	0
2789	1	3	0	1	0	0	2	2	0	0	2	2	2	1	0	0	0	20	0	0	0	2	2	2	2	4	0
2805	1	3	0	1	0	0	3	3	1	1	2	3	3	1	0	0	0	20	0	0	0	3	3	3	3	6	0
2821	1	3	0	1	1	1	1	2	1	1	1	1	2	1	0	0	1	20	0	0	1	1	2	1	2	3	1
2823	0	3	0	1	3	0	1	2	1	0	2	1	2	1	1	0	0	20	0	0	1	1	2	1	2	3	1
2839	0	3	0	1	0	0	3	2	1	0	2	3	2	1	1	0	0	20	0	0	1	3	2	3	2	5	1
2854	1	3	0	1	1	1	1	2	1	1	1	1	2	1	0	0	1	20	0	0	1	1	2	1	2	3	1
2856	0	3	0	1	3	0	1	2	1	0	2	1	2	1	0	0	0	20	0	0	0	1	2	1	2	3	0
2860	1	3	0	1	1	1	1	2	1	1	1	1	2	1	0	0	1	20	0	0	1	1	2	1	2	3	1
2865	1	3	0	1	2	0	1	1	1	0	2	1	1	1	0	0	0	20	0	0	0	1	1	1	1	2	0
2873	0	3	0	1	0	0	1	2	0	1	2	1	2	1	1	0	0	20	0	0	1	1	2	1	2	3	1
2908	1	3	0	1	1	1	1	2	1	1	1	1	2	1	0	0	1	20	0	0	1	1	2	1	2	3	1
2919	0	3	0	1	3	0	1	2	1	1	2	1	2	1	1	0	0	20	0	0	1	1	2	1	2	3	1
2921	0	3	0	1	0	0	1	2	0	1	2	1	2	1	1	0	0	20	0	0	1	1	2	1	2	3	1
2929	1	3	0	1	2	0	1	1	1	0	2	1	1	1	0	0	0	20	0	0	0	1	1	1	1	2	0
2945	1	3	0	1	1	1	1	2	1	1	1	1	2	1	0	0	1	20	0	0	1	1	2	1	2	3	1
2949	1	3	0	1	1	1	1	2	1	1	1	1	2	1	0	0	1	20	0	0	1	1	2	1	2	3	1
2978	0	3	0	1	4	1	1	2	0	1	1	1	2	1	0	0	1	20	0	0	1	1	2	1	2	3	1
3021	1	3	0	1	0	0	2	2	0	0	2	2	2	1	0	0	0	20	0	0	0	2	2	2	2	4	0
3042	0	3	0	1	1	1	1	2	1	1	1	1	2	1	0	0	1	20	0	0	1	1	2	1	2	3	1
3099	0	3	0	1	3	0	1	2	1	0	2	1	2	1	1	0	0	20	0	0	1	1	2	1	2	3	1
3134	1	3	0	1	1	1	1	2	1	1	1	1	2	1	0	0	1	20	0	0	1	1	2	1	2	3	1
3140	1	3	0	1	4	0	1	2	1	1	1	1	2	1	0	1	0	20	0	0	1	1	2	1	2	3	1
3145	1	3	0	1	0	0	3	3	1	0	2	3	3	1	0	0	0	20	0	0	0	3	3	3	3	6	0
3148	1	3	0	1	0	0	3	3	1	0	2	3	3	1	0	0	0	20	0	0	0	3	3	3	3	6	0
3173	0	3	0	1	0	1	1	2	0	0	1	1	2	1	0	0	0	20	0	0	0	1	2	1	2	3	0
3197	0	3	0	1	3	0	1	2	1	1	2	1	2	1	1	0	0	20	0	0	1	1	2	1	2	3	1
3205	0	3	0	1	3	0	3	1	0	1	2	3	2	1	0	0	1	20	0	0	1	3	1	3	2	5	1
3214	0	3	0	1	4	1	1	2	0	1	1	1	2	1	0	0	1	20	0	0	1	1	2	1	2	3	1
3229	0	3	0	1	3	0	1	2	1	0	2	1	2	1	1	0	0	20	0	0	1	1	2	1	2	3	1
3275	1	3	0	1	1	1	1	2	1	1	1	1	2	1	0	0	1	20	0	0	1	1	2	1	2	3	1
3315	0	3	0	1	3	0	1	2	1	0	2	1	2	1	1	0	0	20	0	0	1	1	2	1	2	3	1
3321	1	3	0	1	0	0	3	3	1	0	2	3	3	1	0	0	0	20	0	0	0	3	3	3	3	6	0
3324	0	3	0	1	3	0	3	1	0	1	2	3	2	1	0	0	1	20	0	0	1	3	1	3	2	5	1
3332	0	3	0	1	0	1	1	2	1	1	1	1	2	1	0	0	1	20	0	0	1	1	2	1	2	3	1
3338	0	3	0	1	0	0	1	2	0	1	2	1	2	1	1	0	0	20	0	0	1	1	2	1	2	3	1
3341	0	3	0	1	0	1	1	2	1	1	1	1	2	1	0	0	1	20	0	0	1	1	2	1	2	3	1
3356	1	3	0	1	0	0	3	3	1	0	2	3	3	1	0	0	0	20	0	0	0	3	3	3	3	6	0
3362	0	3	0	1	1	0	1	2	1	0	2	2	3	1	0	0	0	20	0	0	0	1	2	2	3	5	0
3409	0	3	0	1	3	0	3	1	0	1	2	3	2	1	0	0	1	20	0	0	1	3	1	3	2	5	1
3414	0	3	0	1	3	0	3	1	0	1	2	3	2	1	0	0	1	20	0	0	1	3	1	3	2	5	1
3415	0	3	0	1	1	1	1	2	1	1	1	1	2	1	0	0	1	20	0	0	1	1	2	1	2	3	1
3421	0	3	0	1	0	1	1	2	0	0	1	1	2	1	0	0	0	20	0	0	0	1	2	1	2	3	0
3429	0	3	0	1	0	1	1	2	0	1	1	1	2	1	0	0	0	20	0	0	0	1	2	1	2	3	0
3443	0	3	0	1	0	1	1	2	0	0	1	1	2	1	0	0	0	20	0	0	0	1	2	1	2	3	0
3446	0	3	0	1	0	0	1	2	0	1	2	1	2	1	1	0	0	20	0	0	1	1	2	1	2	3	1
3473	0	3	0	1	0	1	1	2	1	1	1	1	2	1	0	0	1	20	0	0	1	1	2	1	2	3	1
3480	0	3	0	1	4	1	1	2	0	1	1	1	2	1	0	0	1	20	0	0	1	1	2	1	2	3	1
3499	0	3	0	1	3	0	3	3	1	0	2	3	3	1	1	0	0	20	0	0	1	3	3	3	3	6	1
3507	0	3	0	1	0	1	1	2	0	0	1	1	2	1	0	0	0	20	0	0	0	1	2	1	2	3	0
3508	0	3	0	1	3	0	1	2	1	0	2	1	2	1	1	0	0	20	0	0	1	1	2	1	2	3	1
3512	0	3	0	1	0	0	1	2	0	1	2	1	2	1	1	0	0	20	0	0	1	1	2	1	2	3	1
3513	1	3	0	1	0	0	3	3	1	0	2	3	3	1	0	0	0	20	0	0	0	3	3	3	3	6	0
3527	0	3	0	1	3	0	1	2	1	1	2	1	2	1	1	0	0	20	0	0	1	1	2	1	2	3	1
3531	1	3	0	1	0	0	3	3	1	1	2	3	3	1	0	0	0	20	0	0	0	3	3	3	3	6	0
3535	0	3	0	1	3	0	1	2	1	1	2	1	2	1	1	0	0	20	0	0	1	1	2	1	2	3	1
3552	0	3	0	1	3	0	1	2	1	0	1	1	2	1	1	0	0	20	0	0	1	1	2	1	2	3	1
3563	0	3	0	1	1	1	1	2	1	1	1	1	2	1	0	0	1	20	0	0	1	1	2	1	2	3	1
3576	1	3	0	1	3	0	1	2	0	1	2	2	2	1	0	0	1	20	1	0	1	1	2	2	2	4	2
3580	1	3	0	1	4	0	3	2	1	1	1	2	1	1	0	1	0	20	0	0	1	3	2	2	1	3	1
3582	0	3	0	1	0	1	1	2	1	1	1	1	2	1	0	0	1	20	0	0	1	1	2	1	2	3	1
3628	1	3	0	1	1	1	1	2	1	1	1	1	2	1	0	0	1	20	0	0	1	1	2	1	2	3	1
3669	1	3	0	1	2	1	1	2	1	1	1	1	2	1	0	0	1	20	0	0	1	1	2	1	2	3	1
3678	0	3	0	1	3	0	1	2	1	1	2	1	2	1	1	0	0	20	0	0	1	1	2	1	2	3	1
3713	0	3	0	1	3	0	1	2	1	1	2	1	2	1	1	0	0	20	0	0	1	1	2	1	2	3	1
3715	1	3	0	1	2	0	1	2	1	0	2	2	3	1	0	0	0	20	0	0	0	1	2	2	3	5	0
3754	0	3	0	1	3	0	1	2	1	0	1	1	2	1	1	0	0	20	0	0	1	1	2	1	2	3	1
3785	0	3	0	1	0	0	1	2	0	0	2	1	2	1	0	0	0	20	0	0	0	1	2	1	2	3	0
3787	0	3	0	1	4	1	1	2	0	1	1	1	2	1	0	0	1	20	0	0	1	1	2	1	2	3	1
3800	1	3	0	1	1	1	1	2	1	1	1	1	2	1	0	0	1	20	0	0	1	1	2	1	2	3	1
3818	0	3	0	1	0	1	1	2	0	1	1	1	2	1	0	0	0	20	0	0	0	1	2	1	2	3	0
3821	0	3	0	1	3	0	1	2	1	0	2	1	2	1	1	0	0	20	0	0	1	1	2	1	2	3	1
3843	0	3	0	1	0	1	1	2	0	1	1	1	2	1	0	0	0	20	0	0	0	1	2	1	2	3	0
3855	1	3	0	1	1	1	1	2	1	1	1	1	2	1	0	0	1	20	0	0	1	1	2	1	2	3	1
3902	0	3	0	1	1	1	1	2	1	1	1	1	2	1	0	0	1	20	0	0	1	1	2	1	2	3	1
3910	0	3	0	1	0	0	1	2	0	1	2	1	2	1	1	0	0	20	0	0	1	1	2	1	2	3	1
3929	1	3	0	1	4	0	1	2	1	1	1	1	2	1	0	1	0	20	0	0	1	1	2	1	2	3	1
3930	1	3	0	1	0	0	2	2	0	0	2	2	2	1	0	0	0	20	0	0	0	2	2	2	2	4	0
4009	0	3	0	1	4	1	1	2	0	1	1	1	2	1	0	0	1	20	0	0	1	1	2	1	2	3	1
4025	0	3	0	1	4	1	1	2	0	1	1	1	2	1	0	0	1	20	0	0	1	1	2	1	2	3	1
4061	1	3	0	1	2	0	1	2	1	0	2	2	3	1	0	0	0	20	0	0	0	1	2	2	3	5	0
4086	0	3	0	1	0	0	3	2	1	0	2	3	2	1	1	0	0	20	0	0	1	3	2	3	2	5	1
4127	0	3	0	1	0	1	1	2	0	1	1	1	2	1	0	0	0	20	0	0	0	1	2	1	2	3	0
4139	0	3	0	1	3	0	1	2	1	0	2	1	2	1	0	0	0	20	0	0	0	1	2	1	2	3	0
4223	1	3	0	1	0	0	3	3	1	1	2	3	3	1	0	0	0	20	0	0	0	3	3	3	3	6	0
4238	0	3	0	1	3	0	4	3	1	0	2	4	4	1	1	0	0	20	0	0	1	3	3	3	3	6	1
4370	0	3	0	1	0	1	1	2	0	0	1	1	2	1	0	0	0	20	0	0	0	1	2	1	2	3	0
4426	1	3	0	1	0	0	3	3	1	0	2	3	3	1	0	0	0	20	0	0	0	3	3	3	3	6	0
4504	0	3	0	1	3	0	1	2	1	1	2	1	2	1	1	0	0	20	0	0	1	1	2	1	2	3	1
4509	0	3	0	1	4	1	1	2	0	1	1	1	2	1	0	0	1	20	0	0	1	1	2	1	2	3	1
4527	1	3	0	1	3	1	1	2	0	1	2	2	2	1	0	0	0	20	0	0	0	1	2	2	2	4	0
4542	0	3	0	1	4	0	1	2	1	1	1	1	2	1	0	1	0	20	0	0	1	1	2	1	2	3	1
4545	0	3	0	1	3	0	3	3	1	0	2	3	3	1	1	0	0	20	0	0	1	3	3	3	3	6	1
4558	0	3	0	1	3	0	1	2	1	0	2	1	2	1	1	0	0	20	0	0	1	1	2	1	2	3	1
4583	0	3	0	1	3	0	1	2	1	0	2	1	2	1	1	0	0	20	0	0	1	1	2	1	2	3	1
4596	0	3	0	1	3	0	1	2	1	0	2	1	2	1	1	0	0	20	0	0	1	1	2	1	2	3	1
4617	0	3	0	1	0	0	1	2	0	1	2	1	2	1	1	0	0	20	0	0	1	1	2	1	2	3	1
4621	1	3	0	1	1	1	1	2	1	1	1	1	2	1	0	0	1	20	0	0	1	1	2	1	2	3	1
4628	1	3	0	1	0	0	2	1	0	0	2	2	2	1	1	0	0	20	0	0	1	2	1	2	2	4	1
4657	0	3	0	1	3	0	1	2	1	0	1	1	2	1	1	0	0	20	0	0	1	1	2	1	2	3	1
4671	0	3	0	1	0	0	1	2	0	1	2	1	2	1	1	0	0	20	0	0	1	1	2	1	2	3	1
4681	0	3	0	1	3	0	1	2	1	0	1	1	2	1	1	0	0	20	0	0	1	1	2	1	2	3	1
4685	1	3	0	1	2	0	1	2	1	0	2	2	3	1	0	0	0	20	0	0	0	1	2	2	3	5	0
4699	0	3	0	1	3	0	1	2	1	1	2	1	2	1	1	0	0	20	0	0	1	1	2	1	2	3	1
4733	0	3	0	1	3	0	3	3	1	0	2	3	3	1	1	0	0	20	0	0	1	3	3	3	3	6	1
4753	1	3	0	1	3	0	1	1	0	1	2	1	1	1	0	0	1	20	0	0	1	1	1	1	1	2	1
4864	1	3	0	1	0	0	3	3	1	1	2	3	3	1	0	0	0	20	0	0	0	3	3	3	3	6	0
4920	0	3	0	1	3	0	1	2	1	1	1	1	2	1	1	0	0	20	0	0	1	1	2	1	2	3	1
4936	0	3	0	1	0	1	1	2	0	1	1	1	2	1	0	0	0	20	0	0	0	1	2	1	2	3	0
5015	1	3	0	1	0	0	1	2	1	1	1	2	2	1	0	0	1	20	2	0	1	1	2	2	2	4	3
5106	0	3	0	1	3	0	1	2	1	0	1	1	2	1	1	0	0	20	0	0	1	1	2	1	2	3	1
5179	0	3	0	1	3	0	1	2	1	0	2	1	2	1	1	0	0	20	0	0	1	1	2	1	2	3	1
5182	0	3	0	1	4	1	1	2	0	1	1	1	2	1	0	0	1	20	0	0	1	1	2	1	2	3	1
5236	0	3	0	1	4	0	1	2	1	1	1	1	2	1	0	1	0	20	0	0	1	1	2	1	2	3	1
5248	0	3	0	1	0	1	1	2	0	1	1	1	2	1	0	0	0	20	0	0	0	1	2	1	2	3	0
5352	1	3	0	1	2	1	1	2	1	1	1	1	2	1	0	0	1	20	0	0	1	1	2	1	2	3	1
5397	0	3	0	1	0	1	1	2	1	1	1	1	2	1	0	0	1	20	0	0	1	1	2	1	2	3	1
5413	0	3	0	1	3	0	1	2	1	1	2	1	2	1	1	0	0	20	0	0	1	1	2	1	2	3	1
5636	1	3	0	1	4	0	1	2	1	1	1	1	2	1	0	1	0	20	0	0	1	1	2	1	2	3	1
5715	1	3	0	1	0	0	2	1	0	0	2	2	2	1	1	0	0	20	0	0	1	2	1	2	2	4	1
5759	0	3	0	1	0	0	1	2	0	1	2	1	2	1	1	0	0	20	0	0	1	1	2	1	2	3	1
5851	0	3	0	1	0	1	1	2	0	1	1	1	2	1	0	0	0	20	0	0	0	1	2	1	2	3	0
5867	0	3	0	1	3	0	1	2	1	1	2	1	2	1	1	0	0	20	0	0	1	1	2	1	2	3	1
5927	1	3	0	1	0	0	2	1	0	0	2	2	2	1	1	0	0	20	0	0	1	2	1	2	2	4	1
5935	0	3	0	1	4	0	1	2	1	1	1	1	2	1	0	1	0	20	0	0	1	1	2	1	2	3	1
5942	0	3	0	1	0	1	1	2	1	1	1	1	2	1	0	0	1	20	0	0	1	1	2	1	2	3	1
5965	1	3	0	1	2	1	1	2	1	1	1	1	2	1	0	0	1	20	0	0	1	1	2	1	2	3	1
6391	1	3	0	1	0	0	2	2	1	0	1	2	2	2	0	0	1	20	0	0	1	2	2	2	2	4	1
6431	1	3	0	1	3	0	1	1	0	1	2	1	1	2	0	0	1	20	0	0	1	1	1	1	1	2	1
6451	1	3	0	1	0	0	2	2	1	0	1	2	2	2	0	0	1	20	0	0	1	2	2	2	2	4	1
6455	0	3	0	1	3	0	3	3	1	0	2	3	3	2	1	0	0	20	0	0	1	3	3	3	3	6	1
6461	0	3	0	1	0	0	3	2	1	0	2	3	2	2	1	0	0	20	0	0	1	3	2	3	2	5	1
6464	0	3	0	1	3	0	3	3	1	0	2	3	3	2	1	0	0	20	0	0	1	3	3	3	3	6	1
6706	0	3	0	1	3	1	2	2	0	1	1	2	2	3	0	0	1	20	0	0	1	2	2	2	2	4	1
6710	0	3	0	1	3	1	2	2	0	1	1	2	2	3	0	0	1	20	0	0	1	2	2	2	2	4	1
6717	1	3	0	1	0	0	2	2	1	0	1	2	2	3	0	0	1	20	0	0	1	2	2	2	2	4	1
6726	0	3	0	1	3	1	2	2	0	1	1	2	2	3	0	0	1	20	0	0	1	2	2	2	2	4	1
6727	0	3	0	1	3	1	2	2	0	1	1	2	2	3	0	0	1	20	0	0	1	2	2	2	2	4	1
6729	0	3	0	1	3	0	3	3	1	0	2	3	3	3	1	0	0	20	0	0	1	3	3	3	3	6	1
36	0	4	0	1	3	0		2	0	1	2	3	3	1	0	0	1	20	0	1	1		2	3	3	6	1
79	1	4	0	1	2	0	2	1	0	0	2	2	2	1	0	0	0	20	0	1	0	2	1	2	2	4	0
99	1	4	0	1	1	1		2	1	1	1	3	3	1	0	0	1	20	0	1	1		2	3	3	6	1
126	1	4	0	1	2	0	2	1	0	0	2	2	2	1	0	0	0	20	0	1	0	2	1	2	2	4	0
128	1	4	0	1	1	1		2	1	1	1	3	3	1	0	0	1	20	0	1	1		2	3	3	6	1
139	0	4	0	1	0	1	2	1	1	1	1	3	2	1	0	0	0	20	1	1	0	2	1	3	2	5	1
155	1	4	0	1	0	1	2	1	1	1	1	3	2	1	0	0	0	20	1	1	0	2	1	3	2	5	1
163	0	4	0	1	0	0	2	1	0	1	2	2	2	1	0	0	0	20	0	1	0	2	1	2	2	4	0
171	0	4	0	1	3	0		2	1	1	1	3	3	1	1	0	0	20	0	1	1		2	3	3	6	1
181	0	4	0	1	0	1	3	1	1	1	1	3	3	1	0	0	0	20	1	1	0	3	1	3	3	6	1
198	0	4	0	1	3	0		1	1	0	2	3	3	1	0	0	0	20	0	1	0		1	3	3	6	0
213	0	4	0	1	0	0		2	0	1	2	3	3	1	0	0	1	20	0	1	1		2	3	3	6	1
217	1	4	0	1	2	0	2	1	0	0	2	2	2	1	0	0	0	20	0	1	0	2	1	2	2	4	0
272	0	4	0	1	0	1	2	1	0	1	1	3	3	1	0	0	0	20	1	1	0	2	1	3	3	6	1
308	0	4	0	1	3	0		1	1	0	2	3	3	1	0	0	0	20	0	1	0		1	3	3	6	0
319	0	4	0	1	0	1	2	1	0	1	1	3	2	1	0	0	0	20	1	1	0	2	1	3	2	5	1
325	0	4	0	1	0	1	2	1	0	1	1	3	3	1	0	0	0	20	1	1	0	2	1	3	3	6	1
339	0	4	0	1	3	0		2	0	1	2	3	3	1	0	0	1	20	0	1	1		2	3	3	6	1
350	1	4	0	1	2	0	2	1	0	0	2	2	2	1	0	0	0	20	0	1	0	2	1	2	2	4	0
367	0	4	0	1	3	0		2	1	0	1	3	3	1	1	0	0	20	0	1	1		2	3	3	6	1
376	1	4	0	1	2	0	2	1	0	0	2	2	2	1	0	0	0	20	0	1	0	2	1	2	2	4	0
380	0	4	0	1	0	1	3	1	1	1	1	3	3	1	0	0	0	20	1	1	0	3	1	3	3	6	1
387	1	4	0	1	0	0	2	1	0	1	2	2	2	1	0	0	0	20	0	1	0	2	1	2	2	4	0
396	0	4	0	1	0	0		2	0	1	2	3	3	1	0	0	1	20	0	1	1		2	3	3	6	1
418	1	4	0	1	1	1		2	1	1	1	3	3	1	0	0	1	20	0	1	1		2	3	3	6	1
426	0	4	0	1	1	0	3	2	0	0	2	2	1	1	0	0	0	20	0	1	0	3	2	2	1	3	0
432	0	4	0	1	0	0	3	3	0	1	2	3	2	1	0	0	1	20	0	1	1	3	3	3	2	5	1
440	1	4	0	1	2	0	1	1	0	0	2	2	2	1	0	0	0	20	0	1	0	1	1	2	2	4	0
454	0	4	0	1	3	0		2	0	1	2	3	3	1	0	0	1	20	0	1	1		2	3	3	6	1
463	0	4	0	1	3	0		2	0	1	2	3	3	1	0	0	1	20	0	1	1		2	3	3	6	1
467	1	4	0	1	2	0	2	1	0	0	2	2	2	1	0	0	0	20	0	1	0	2	1	2	2	4	0
472	0	4	0	1	3	0		1	1	0	2	3	3	1	0	0	0	20	0	1	0		1	3	3	6	0
478	0	4	0	1	0	0		2	0	1	2	3	3	1	0	0	1	20	0	1	1		2	3	3	6	1
489	0	4	0	1	3	0		1	1	0	1	3	3	1	1	0	0	20	0	1	1		1	3	3	6	1
492	0	4	0	1	0	0	3	1	1	0	2	3	2	1	1	0	0	20	0	1	1	3	1	3	2	5	1
501	0	4	0	1	3	0		2	1	0	1	3	3	1	1	0	0	20	0	1	1		2	3	3	6	1
507	0	4	0	1	0	1	2	1	0	0	1	2	2	1	0	0	0	20	0	1	0	2	1	2	2	4	0
510	1	4	0	1	2	0	1	1	0	0	2	2	2	1	0	0	0	20	0	1	0	1	1	2	2	4	0
512	0	4	0	1	0	1	2	1	0	1	1	2	2	1	0	0	0	20	0	1	0	2	1	2	2	4	0
521	1	4	0	1	1	1		2	1	1	1	3	3	1	0	0	1	20	0	1	1		2	3	3	6	1
532	0	4	0	1	0	0		2	0	1	2	3	3	1	0	0	1	20	0	1	1		2	3	3	6	1
536	0	4	0	1	3	0		1	1	0	2	3	3	1	0	0	0	20	0	1	0		1	3	3	6	0
544	1	4	0	1	0	0	2	1	0	1	2	2	2	1	0	0	0	20	0	1	0	2	1	2	2	4	0
562	1	4	0	1	1	1	2	1	1	1	2	3	2	1	0	0	0	20	0	1	0	2	1	3	2	5	0
571	0	4	0	1	0	1	2	1	0	1	1	2	2	1	0	0	0	20	0	1	0	2	1	2	2	4	0
576	0	4	0	1	0	1	2	1	0	1	1	3	2	1	0	0	0	20	1	1	0	2	1	3	2	5	1
581	0	4	0	1	3	0		2	0	1	2	3	3	1	0	0	1	20	0	1	1		2	3	3	6	1
584	0	4	0	1	0	1		1	0	1	1	3	3	1	0	0	0	20	0	1	0		1	3	3	6	0
622	1	4	0	1	2	0	1	1	0	0	2	2	2	1	0	0	0	20	0	1	0	1	1	2	2	4	0
630	0	4	0	1	3	0		1	1	0	1	3	3	1	1	0	0	20	0	1	1		1	3	3	6	1
638	0	4	0	1	0	1	2	1	0	1	1	2	2	1	0	0	0	20	0	1	0	2	1	2	2	4	0
664	1	4	0	1	1	1		2	1	1	1	3	3	1	0	0	1	20	0	1	1		2	3	3	6	1
687	1	4	0	1	1	1		2	1	1	1	3	3	1	0	0	1	20	0	1	1		2	3	3	6	1
725	1	4	0	1	0	1	2	1	0	0	2	3	2	1	0	0	0	20	0	1	0	2	1	3	2	5	0
732	0	4	0	1	0	1		2	1	1	1	3	3	1	0	0	1	20	0	1	1		2	3	3	6	1
735	1	4	0	1	1	1		2	1	1	1	3	3	1	0	0	1	20	0	1	1		2	3	3	6	1
779	1	4	0	1	2	0	1	1	0	0	2	2	2	1	0	0	0	20	0	1	0	1	1	2	2	4	0
817	1	4	0	1	1	0	2	1	0	1	2	2	2	1	0	0	0	20	0	1	0	2	1	2	2	4	0
840	0	4	0	1	3	0		1	1	1	2	3	3	1	1	0	0	20	0	1	1		1	3	3	6	1
847	0	4	0	1	0	0		2	0	1	2	3	3	1	0	0	1	20	0	1	1		2	3	3	6	1
874	0	4	0	1	0	1	2	1	0	1	1	3	3	1	0	0	0	20	0	1	0	2	1	3	3	6	0
902	0	4	0	1	0	0	2	2	1	1	2	2	2	1	1	0	0	20	0	1	1	2	2	2	2	4	1
905	0	4	0	1	3	0		1	1	1	2	3	3	1	0	0	0	20	0	1	0		1	3	3	6	0
918	0	4	0	1	0	0	2	1	0	0	2	2	1	1	0	0	0	20	0	1	0	2	1	2	1	3	0
931	1	4	0	1	0	1	2	1	0	0	2	3	2	1	0	0	0	20	0	1	0	2	1	3	2	5	0
941	0	4	0	1	0	0	2	2	1	1	2	2	2	1	1	0	0	20	0	1	1	2	2	2	2	4	1
960	0	4	0	1	0	0	3	2	0	1	2	3	2	1	1	0	0	20	0	1	1	3	2	3	2	5	1
962	0	4	0	1	0	1	2	1	0	0	1	2	2	1	0	0	0	20	0	1	0	2	1	2	2	4	0
964	1	4	0	1	0	0	2	1	0	1	2	2	2	1	0	0	0	20	0	1	0	2	1	2	2	4	0
974	1	4	0	1	0	0	3	1	0	0	2	3	2	1	0	0	0	20	0	1	0	3	1	3	2	5	0
975	0	4	0	1	3	0		1	1	0	2	3	3	1	0	0	0	20	0	1	0		1	3	3	6	0
1008	1	4	0	1	2	0	1	1	0	0	2	2	2	1	0	0	0	20	0	1	0	1	1	2	2	4	0
1011	0	4	0	1	3	0		2	1	0	1	3	3	1	1	0	0	20	0	1	1		2	3	3	6	1
1028	0	4	0	1	0	1		1	0	1	1	3	3	1	0	0	0	20	0	1	0		1	3	3	6	0
1030	0	4	0	1	1	0	3	2	0	0	2	2	1	1	0	0	0	20	0	1	0	3	2	2	1	3	0
1046	0	4	0	1	0	0	2	1	1	0	2	2	2	1	1	0	0	20	0	1	1	2	1	2	2	4	1
1049	0	4	0	1	3	0		2	1	1	1	3	3	1	1	0	0	20	0	1	1		2	3	3	6	1
1051	1	4	0	1	2	0	2	1	0	0	2	2	2	1	0	0	0	20	0	1	0	2	1	2	2	4	0
1055	0	4	0	1	0	0	2	2	0	0	2	2	1	1	0	0	0	20	0	1	0	2	2	2	1	3	0
1076	0	4	0	1	0	0	2	1	1	0	2	2	2	1	1	0	0	20	0	1	1	2	1	2	2	4	1
1114	1	4	0	1	2	0	2	1	0	0	2	2	2	1	0	0	0	20	0	1	0	2	1	2	2	4	0
1115	0	4	0	1	0	0	3	1	0	1	2	3	2	1	1	0	0	20	0	1	1	3	1	3	2	5	1
1126	0	4	0	1	3	0		1	1	0	2	3	3	1	0	0	0	20	0	1	0		1	3	3	6	0
1150	0	4	0	1	3	0		1	1	1	2	3	3	1	1	0	0	20	0	1	1		1	3	3	6	1
1161	0	4	0	1	3	0		2	0	1	2	3	3	1	0	0	1	20	0	1	1		2	3	3	6	1
1185	0	4	0	1	0	0		2	0	1	2	3	3	1	0	0	1	20	0	1	1		2	3	3	6	1
1193	1	4	0	1	0	1	2	1	1	0	2	2	1	1	0	0	0	20	0	1	0	2	1	2	1	3	0
1201	0	4	0	1	0	0	3	2	1	0	2	3	2	1	1	0	0	20	0	1	1	3	2	3	2	5	1
1204	0	4	0	1	0	0		2	0	1	2	3	3	1	0	0	1	20	0	1	1		2	3	3	6	1
1209	0	4	0	1	1	1	2	1	1	0	2	2	1	1	0	0	0	20	0	1	0	2	1	2	1	3	0
1210	0	4	0	1	0	0		2	0	1	2	3	3	1	0	0	1	20	0	1	1		2	3	3	6	1
1217	1	4	0	1	2	0	2	1	0	0	2	2	2	1	0	0	0	20	0	1	0	2	1	2	2	4	0
1242	0	4	0	1	0	0	2	2	1	0	2	2	2	1	1	0	0	20	0	1	1	2	2	2	2	4	1
1389	0	4	0	1	0	0	3	2	1	0	2	3	2	2	1	0	0	20	0	1	1	3	2	3	2	5	1
1485	1	4	0	1	1	1		2	1	1	1	3	3	1	0	0	1	20	0	0	1		2	3	3	6	1
1490	0	4	0	1	0	1	2	1	0	1	1	2	2	1	0	0	0	20	0	0	0	2	1	2	2	4	0
1526	1	4	0	1	2	0	2	1	0	0	2	2	2	1	0	0	0	20	0	0	0	2	1	2	2	4	0
1532	1	4	0	1	1	1		2	1	1	1	3	3	1	0	0	1	20	0	0	1		2	3	3	6	1
1541	0	4	0	1	0	1	2	1	0	1	1	2	2	1	0	0	0	20	0	0	0	2	1	2	2	4	0
1563	0	4	0	1	3	0		2	1	0	1	3	3	1	1	0	0	20	0	0	1		2	3	3	6	1
1580	0	4	0	1	0	1	3	1	1	1	1	3	3	1	0	0	0	20	1	0	0	3	1	3	3	6	1
1591	0	4	0	1	3	0		1	1	0	1	3	3	1	1	0	0	20	0	0	1		1	3	3	6	1
1608	0	4	0	1	0	0	2	1	0	0	2	2	1	1	0	0	0	20	0	0	0	2	1	2	1	3	0
1623	0	4	0	1	3	0		2	0	1	2	3	3	1	0	0	1	20	0	0	1		2	3	3	6	1
1628	1	4	0	1	1	0	2	1	0	1	2	2	2	1	0	0	0	20	0	0	0	2	1	2	2	4	0
1640	1	4	0	1	0	1	2	1	0	0	2	3	2	1	0	0	0	20	0	0	0	2	1	3	2	5	0
1644	1	4	0	1	1	1		2	1	1	1	3	3	1	0	0	1	20	0	0	1		2	3	3	6	1
1647	0	4	0	1	0	0	3	2	0	0	2	2	1	1	0	0	0	20	0	0	0	3	2	2	1	3	0
1652	0	4	0	1	0	0		2	0	1	2	3	3	1	0	0	1	20	0	0	1		2	3	3	6	1
1665	0	4	0	1	0	0	2	1	0	0	2	2	1	1	0	0	0	20	0	0	0	2	1	2	1	3	0
1697	1	4	0	1	2	1		2	1	1	1	3	3	1	0	0	1	20	0	0	1		2	3	3	6	1
1740	0	4	0	1	3	0		1	1	1	2	3	3	1	0	0	0	20	0	0	0		1	3	3	6	0
1751	0	4	0	1	3	0		1	1	0	1	3	3	1	1	0	0	20	0	0	1		1	3	3	6	1
1775	0	4	0	1	0	1		2	1	1	1	3	3	1	0	0	1	20	0	0	1		2	3	3	6	1
1805	0	4	0	1	0	0	1	3	1	1	2	2	3	1	0	0	0	20	0	0	0	1	3	2	3	5	0
1822	1	4	0	1	0	1	2	1	0	0	2	3	2	1	0	0	0	20	0	0	0	2	1	3	2	5	0
1829	1	4	0	1	0	1	2	1	0	0	2	3	2	1	0	0	0	20	0	0	0	2	1	3	2	5	0
1840	1	4	0	1	2	1	2	1	0	1	2	3	2	1	0	0	0	20	0	0	0	2	1	3	2	5	0
1844	0	4	0	1	0	0	3	1	0	1	2	3	2	1	1	0	0	20	0	0	1	3	1	3	2	5	1
1855	0	4	0	1	3	0		2	0	1	2	3	3	1	0	0	1	20	0	0	1		2	3	3	6	1
1862	0	4	0	1	0	0		2	0	1	2	3	3	1	0	0	1	20	0	0	1		2	3	3	6	1
1870	0	4	0	1	0	0		2	0	1	2	3	3	1	0	0	1	20	0	0	1		2	3	3	6	1
1888	1	4	0	1	1	1		2	1	1	1	3	3	1	0	0	1	20	0	0	1		2	3	3	6	1
1893	0	4	0	1	3	0		2	0	1	2	3	3	1	0	0	1	20	0	0	1		2	3	3	6	1
1898	0	4	0	1	1	0	3	2	0	0	2	2	1	1	0	0	0	20	0	0	0	3	2	2	1	3	0
1901	1	4	0	1	1	1		2	1	1	1	3	3	1	0	0	1	20	0	0	1		2	3	3	6	1
1910	0	4	0	1	3	0		1	1	1	2	3	3	1	1	0	0	20	0	0	1		1	3	3	6	1
1914	0	4	0	1	3	0		2	1	0	1	3	3	1	1	0	0	20	0	0	1		2	3	3	6	1
1920	1	4	0	1	2	0	2	1	0	0	2	2	2	1	0	0	0	20	0	0	0	2	1	2	2	4	0
1926	0	4	0	1	0	1		2	1	1	1	3	3	1	0	0	1	20	0	0	1		2	3	3	6	1
1940	0	4	0	1	3	0		2	0	1	2	3	3	1	0	0	1	20	0	0	1		2	3	3	6	1
1951	0	4	0	1	0	0		2	0	1	2	3	3	1	0	0	1	20	0	0	1		2	3	3	6	1
1964	0	4	0	1	0	0	3	3	0	1	2	3	2	1	0	0	1	20	0	0	1	3	3	3	2	5	1
1981	1	4	0	1	2	0	2	1	0	0	2	2	2	1	0	0	0	20	0	0	0	2	1	2	2	4	0
1984	1	4	0	1	1	1		2	1	1	1	3	3	1	0	0	1	20	0	0	1		2	3	3	6	1
1998	0	4	0	1	3	0		1	1	0	1	3	3	1	1	0	0	20	0	0	1		1	3	3	6	1
2002	0	4	0	1	0	1		2	1	1	1	3	3	1	0	0	1	20	0	0	1		2	3	3	6	1
2023	0	4	0	1	0	1	3	1	1	1	1	3	3	1	0	0	0	20	1	0	0	3	1	3	3	6	1
2037	0	4	0	1	0	1	2	1	0	1	1	3	3	1	0	0	0	20	1	0	0	2	1	3	3	6	1
2047	1	4	0	1	0	0	2	1	0	1	2	2	2	1	0	0	0	20	0	0	0	2	1	2	2	4	0
2052	1	4	0	1	0	0	3	2	0	0	2	2	1	1	0	0	0	20	0	0	0	3	2	2	1	3	0
2058	0	4	0	1	3	0		1	1	1	2	3	3	1	1	0	0	20	0	0	1		1	3	3	6	1
2080	0	4	0	1	0	1	3	1	0	1	1	3	3	1	0	0	0	20	1	0	0	3	1	3	3	6	1
2089	0	4	0	1	0	0	3	3	0	1	2	3	2	1	0	0	1	20	0	0	1	3	3	3	2	5	1
2090	0	4	0	1	0	0		2	0	1	2	3	3	1	0	0	1	20	0	0	1		2	3	3	6	1
2096	0	4	0	1	0	1	2	1	0	1	1	3	2	1	0	0	0	20	1	0	0	2	1	3	2	5	1
2097	0	4	0	1	0	1	2	1	0	1	2	2	2	1	0	0	0	20	0	0	0	2	1	2	2	4	0
2099	0	4	0	1	3	0		1	1	1	2	3	3	1	0	0	0	20	0	0	0		1	3	3	6	0
2129	1	4	0	1	1	1		2	1	1	1	3	3	1	0	0	1	20	0	0	1		2	3	3	6	1
2141	1	4	0	1	0	1	2	1	0	0	2	3	2	1	0	0	0	20	0	0	0	2	1	3	2	5	0
2146	1	4	0	1	0	1	2	1	0	0	2	3	2	1	0	0	0	20	0	0	0	2	1	3	2	5	0
2159	0	4	0	1	3	0		2	0	1	2	3	3	1	0	0	1	20	0	0	1		2	3	3	6	1
2170	1	4	0	1	0	1	2	1	0	0	2	3	2	1	0	0	0	20	0	0	0	2	1	3	2	5	0
2177	1	4	0	1	1	1		2	1	1	1	3	3	1	0	0	1	20	0	0	1		2	3	3	6	1
2197	0	4	0	1	0	0	2	2	1	1	2	2	2	1	1	0	0	20	0	0	1	2	2	2	2	4	1
2205	1	4	0	1	1	1		2	1	1	1	3	3	1	0	0	1	20	0	0	1		2	3	3	6	1
2213	1	4	0	1	0	1	2	1	1	1	1	3	2	1	0	0	0	20	1	0	0	2	1	3	2	5	1
2216	1	4	0	1	1	1		2	1	1	1	3	3	1	0	0	1	20	0	0	1		2	3	3	6	1
2224	1	4	0	1	2	0	2	1	0	0	2	2	2	1	0	0	0	20	0	0	0	2	1	2	2	4	0
2227	1	4	0	1	1	1		2	1	1	1	3	3	1	0	0	1	20	0	0	1		2	3	3	6	1
2260	0	4	0	1	0	1	3	1	1	1	1	3	3	1	0	0	0	20	1	0	0	3	1	3	3	6	1
2264	0	4	0	1	3	0		2	0	1	2	3	3	1	0	0	1	20	0	0	1		2	3	3	6	1
2266	0	4	0	1	3	0		1	1	0	2	3	3	1	0	0	0	20	0	0	0		1	3	3	6	0
2287	0	4	0	1	0	0		2	0	1	2	3	3	1	0	0	1	20	0	0	1		2	3	3	6	1
2288	0	4	0	1	0	0	3	3	0	1	2	3	2	1	0	0	1	20	0	0	1	3	3	3	2	5	1
2301	1	4	0	1	0	1	2	1	0	0	2	3	2	1	0	0	0	20	0	0	0	2	1	3	2	5	0
2312	0	4	0	1	3	0		1	1	1	2	3	3	1	0	0	0	20	0	0	0		1	3	3	6	0
2317	1	4	0	1	0	0	2	1	0	1	2	2	2	1	0	0	0	20	0	0	0	2	1	2	2	4	0
2323	0	4	0	1	0	0	2	1	0	0	2	2	1	1	0	0	0	20	0	0	0	2	1	2	1	3	0
2329	0	4	0	1	0	0		2	0	1	2	3	3	1	0	0	1	20	0	0	1		2	3	3	6	1
2331	1	4	0	1	2	0	2	1	0	0	2	2	2	1	0	0	0	20	0	0	0	2	1	2	2	4	0
2335	0	4	0	1	0	0	2	1	0	0	2	3	3	1	0	0	0	20	0	0	0	2	1	3	3	6	0
2342	0	4	0	1	0	0	3	1	0	1	2	3	2	1	1	0	0	20	0	0	1	3	1	3	2	5	1
2343	0	4	0	1	0	0	2	2	1	1	2	2	2	1	1	0	0	20	0	0	1	2	2	2	2	4	1
2358	1	4	0	1	2	0	2	1	0	0	2	2	2	1	0	0	0	20	0	0	0	2	1	2	2	4	0
2359	0	4	0	1	0	1	2	1	0	0	1	3	3	1	0	0	0	20	0	0	0	2	1	3	3	6	0
2362	0	4	0	1	0	0	2	1	0	0	2	2	1	1	0	0	0	20	0	0	0	2	1	2	1	3	0
2372	0	4	0	1	0	0		2	0	1	2	3	3	1	0	0	1	20	0	0	1		2	3	3	6	1
2379	0	4	0	1	3	0		1	1	1	2	3	3	1	0	0	0	20	0	0	0		1	3	3	6	0
2380	0	4	0	1	0	0	3	1	0	1	2	3	2	1	1	0	0	20	0	0	1	3	1	3	2	5	1
2381	0	4	0	1	3	0		2	0	1	2	3	3	1	0	0	1	20	0	0	1		2	3	3	6	1
2395	0	4	0	1	0	0	3	3	0	1	2	3	2	1	0	0	1	20	0	0	1	3	3	3	2	5	1
2396	0	4	0	1	0	0	2	1	0	0	2	2	1	1	0	0	0	20	0	0	0	2	1	2	1	3	0
2410	0	4	0	1	0	0		2	0	1	2	3	3	1	0	0	1	20	0	0	1		2	3	3	6	1
2417	0	4	0	1	0	0	3	2	1	0	2	3	2	1	1	0	0	20	0	0	1	3	2	3	2	5	1
2419	1	4	0	1	0	0	2	1	0	1	2	2	2	1	0	0	0	20	0	0	0	2	1	2	2	4	0
2429	1	4	0	1	2	0	2	1	0	0	2	2	2	1	0	0	0	20	0	0	0	2	1	2	2	4	0
2430	1	4	0	1	2	0	2	1	0	0	2	2	2	1	0	0	0	20	0	0	0	2	1	2	2	4	0
2432	1	4	0	1	1	1		2	1	1	1	3	3	1	0	0	1	20	0	0	1		2	3	3	6	1
2462	1	4	0	1	0	1	2	1	0	0	2	3	2	1	0	0	0	20	0	0	0	2	1	3	2	5	0
2466	1	4	0	1	2	0	2	1	0	0	2	2	2	1	0	0	0	20	0	0	0	2	1	2	2	4	0
2479	0	4	0	1	0	0	2	2	1	1	2	2	2	1	1	0	0	20	0	0	1	2	2	2	2	4	1
2486	0	4	0	1	0	0	2	1	0	0	2	3	3	1	0	0	0	20	0	0	0	2	1	3	3	6	0
2487	0	4	0	1	0	1		2	1	1	1	3	3	1	0	0	1	20	0	0	1		2	3	3	6	1
2490	0	4	0	1	0	0	2	2	1	0	2	2	2	1	1	0	0	20	0	0	1	2	2	2	2	4	1
2500	1	4	0	1	2	0	2	1	0	0	2	2	2	1	0	0	0	20	0	0	0	2	1	2	2	4	0
2506	1	4	0	1	2	0	1	1	0	0	2	2	3	1	0	0	0	20	0	0	0	1	1	2	3	5	0
2509	0	4	0	1	0	0	2	1	0	1	2	2	2	1	0	0	0	20	0	0	0	2	1	2	2	4	0
2519	0	4	0	1	0	0	2	2	1	0	2	2	2	1	1	0	0	20	0	0	1	2	2	2	2	4	1
2520	0	4	0	1	0	1		2	1	1	1	3	3	1	0	0	1	20	0	0	1		2	3	3	6	1
2526	1	4	0	1	1	0	2	1	0	1	2	2	2	1	0	0	0	20	0	0	0	2	1	2	2	4	0
2532	1	4	0	1	2	0	2	1	0	0	2	2	2	1	0	0	0	20	0	0	0	2	1	2	2	4	0
2535	1	4	0	1	0	1	2	1	0	0	2	3	2	1	0	0	0	20	0	0	0	2	1	3	2	5	0
2539	1	4	0	1	2	1	2	1	0	1	2	3	2	1	0	0	0	20	0	0	0	2	1	3	2	5	0
2541	0	4	0	1	4	1	2	1	0	1	2	3	2	1	0	0	0	20	0	0	0	2	1	3	2	5	0
2547	0	4	0	1	3	0		1	1	0	2	3	3	1	0	0	0	20	0	0	0		1	3	3	6	0
2554	0	4	0	1	0	1	3	1	1	1	1	3	3	1	0	0	0	20	1	0	0	3	1	3	3	6	1
2564	0	4	0	1	0	1	3	1	1	1	1	3	3	1	0	0	0	20	1	0	0	3	1	3	3	6	1
2565	1	4	0	1	0	1	2	1	1	1	1	3	2	1	0	0	0	20	1	0	0	2	1	3	2	5	1
2581	0	4	0	1	3	0		1	1	1	2	3	3	1	1	0	0	20	0	0	1		1	3	3	6	1
2583	0	4	0	1	0	0	2	2	1	1	2	2	2	1	1	0	0	20	0	0	1	2	2	2	2	4	1
2585	0	4	0	1	0	0	2	1	0	1	2	2	2	1	0	0	0	20	0	0	0	2	1	2	2	4	0
2588	0	4	0	1	0	1	3	1	1	1	1	3	3	1	0	0	0	20	1	0	0	3	1	3	3	6	1
2592	1	4	0	1	2	0	2	1	0	0	2	2	2	1	0	0	0	20	0	0	0	2	1	2	2	4	0
2597	0	4	0	1	4	1	2	1	0	1	2	3	2	1	0	0	0	20	0	0	0	2	1	3	2	5	0
2609	0	4	0	1	0	0	3	2	1	0	2	3	2	1	1	0	0	20	0	0	1	3	2	3	2	5	1
2614	0	4	0	1	3	0		1	1	0	2	3	3	1	0	0	0	20	0	0	0		1	3	3	6	0
2630	1	4	0	1	1	1		2	1	1	1	3	3	1	0	0	1	20	0	0	1		2	3	3	6	1
2634	0	4	0	1	0	1		2	1	1	1	3	3	1	0	0	1	20	0	0	1		2	3	3	6	1
2650	0	4	0	1	0	0	3	1	0	1	2	3	2	1	1	0	0	20	0	0	1	3	1	3	2	5	1
2653	0	4	0	1	0	0	2	1	0	0	2	3	3	1	0	0	0	20	0	0	0	2	1	3	3	6	0
2664	1	4	0	1	2	0	1	1	0	0	2	2	3	1	0	0	0	20	0	0	0	1	1	2	3	5	0
2675	0	4	0	1	0	1	2	1	0	1	1	3	3	1	0	0	0	20	1	0	0	2	1	3	3	6	1
2688	0	4	0	1	3	0		1	1	0	2	3	3	1	0	0	0	20	0	0	0		1	3	3	6	0
2691	0	4	0	1	0	0	3	1	0	1	2	3	2	1	1	0	0	20	0	0	1	3	1	3	2	5	1
2699	0	4	0	1	0	0	2	1	1	0	2	2	2	1	1	0	0	20	0	0	1	2	1	2	2	4	1
2700	1	4	0	1	0	1	2	1	0	0	2	3	2	1	0	0	0	20	0	0	0	2	1	3	2	5	0
2713	0	4	0	1	0	0	2	2	1	0	2	2	2	1	1	0	0	20	0	0	1	2	2	2	2	4	1
2721	0	4	0	1	0	1		1	0	1	1	3	3	1	0	0	0	20	0	0	0		1	3	3	6	0
2724	1	4	0	1	0	0	2	1	0	1	2	2	2	1	0	0	0	20	0	0	0	2	1	2	2	4	0
2734	0	4	0	1	0	1		2	1	1	1	3	3	1	0	0	1	20	0	0	1		2	3	3	6	1
2739	0	4	0	1	0	0		2	0	1	2	3	3	1	0	0	1	20	0	0	1		2	3	3	6	1
2742	0	4	0	1	0	0	2	1	0	1	2	2	2	1	0	0	0	20	0	0	0	2	1	2	2	4	0
2753	0	4	0	1	3	0		2	0	1	2	3	3	1	0	0	1	20	0	0	1		2	3	3	6	1
2757	1	4	0	1	1	1		2	1	1	1	3	3	1	0	0	1	20	0	0	1		2	3	3	6	1
2762	0	4	0	1	0	0	3	2	1	0	2	3	2	1	1	0	0	20	0	0	1	3	2	3	2	5	1
2774	0	4	0	1	3	0		1	1	1	2	3	3	1	0	0	0	20	0	0	0		1	3	3	6	0
2800	1	4	0	1	0	1	2	1	0	0	2	3	2	1	0	0	0	20	0	0	0	2	1	3	2	5	0
2803	0	4	0	1	3	0		2	0	1	2	3	3	1	0	0	1	20	0	0	1		2	3	3	6	1
2819	0	4	0	1	0	0	3	3	0	1	2	3	2	1	0	0	1	20	0	0	1	3	3	3	2	5	1
2828	0	4	0	1	0	1	2	1	0	1	1	2	2	1	0	0	0	20	0	0	0	2	1	2	2	4	0
2882	0	4	0	1	3	0		1	1	1	2	3	3	1	0	0	0	20	0	0	0		1	3	3	6	0
2886	0	4	0	1	0	0		2	0	1	2	3	3	1	0	0	1	20	0	0	1		2	3	3	6	1
2890	0	4	0	1	0	0	3	1	0	1	2	3	2	1	1	0	0	20	0	0	1	3	1	3	2	5	1
2896	0	4	0	1	0	0		2	0	1	2	3	3	1	0	0	1	20	0	0	1		2	3	3	6	1
2910	0	4	0	1	3	0		2	0	1	2	3	3	1	0	0	1	20	0	0	1		2	3	3	6	1
2915	1	4	0	1	2	0	3	1	0	0	2	2	2	1	0	0	0	20	0	0	0	3	1	2	2	4	0
2923	0	4	0	1	0	0		2	0	1	2	3	3	1	0	0	1	20	0	0	1		2	3	3	6	1
2967	1	4	0	1	1	0	2	1	0	1	2	2	2	1	0	0	0	20	0	0	0	2	1	2	2	4	0
3026	0	4	0	1	0	0	2	1	0	0	2	2	1	1	0	0	0	20	0	0	0	2	1	2	1	3	0
3030	1	4	0	1	2	1		2	1	1	1	3	3	1	0	0	1	20	0	0	1		2	3	3	6	1
3085	0	4	0	1	1	1	2	1	1	1	2	3	2	1	0	0	0	20	0	0	0	2	1	3	2	5	0
3096	1	4	0	1	1	0	2	1	0	1	2	2	2	1	0	0	0	20	0	0	0	2	1	2	2	4	0
3149	0	4	0	1	0	0		2	0	1	2	3	3	1	0	0	1	20	0	0	1		2	3	3	6	1
3164	1	4	0	1	1	0	2	1	0	1	2	2	2	1	0	0	0	20	0	0	0	2	1	2	2	4	0
3203	0	4	0	1	0	0		2	0	1	2	3	3	1	0	0	1	20	0	0	1		2	3	3	6	1
3220	1	4	0	1	1	1		2	1	1	1	3	3	1	0	0	1	20	0	0	1		2	3	3	6	1
3225	0	4	0	1	0	1		2	1	1	1	3	3	1	0	0	1	20	0	0	1		2	3	3	6	1
3242	0	4	0	1	0	0		2	0	1	2	3	3	1	0	0	1	20	0	0	1		2	3	3	6	1
3245	0	4	0	1	3	0		1	1	0	1	3	3	1	1	0	0	20	0	0	1		1	3	3	6	1
3255	0	4	0	1	0	0	3	3	0	1	2	3	2	1	0	0	1	20	0	0	1	3	3	3	2	5	1
3264	0	4	0	1	0	0	2	2	1	1	2	2	2	1	1	0	0	20	0	0	1	2	2	2	2	4	1
3277	1	4	0	1	0	0	3	1	0	0	2	3	2	1	0	0	0	20	0	0	0	3	1	3	2	5	0
3278	0	4	0	1	0	1		2	1	1	1	3	3	1	0	0	1	20	0	0	1		2	3	3	6	1
3283	1	4	0	1	2	0	2	1	0	0	2	2	2	1	0	0	0	20	0	0	0	2	1	2	2	4	0
3287	0	4	0	1	0	1	2	1	0	1	1	3	3	1	0	0	0	20	1	0	0	2	1	3	3	6	1
3293	1	4	0	1	1	0	2	1	0	1	2	2	2	1	0	0	0	20	0	0	0	2	1	2	2	4	0
3318	0	4	0	1	0	0	2	1	0	0	2	3	3	1	0	0	0	20	0	0	0	2	1	3	3	6	0
3326	0	4	0	1	3	0		2	0	1	2	3	3	1	0	0	1	20	0	0	1		2	3	3	6	1
3342	0	4	0	1	1	0	1	1	1	0	2	2	2	1	0	0	0	20	0	0	0	1	1	2	2	4	0
3369	1	4	0	1	0	1	2	1	1	0	2	2	1	1	0	0	0	20	0	0	0	2	1	2	1	3	0
3371	1	4	0	1	1	1		2	1	1	1	3	3	1	0	0	1	20	0	0	1		2	3	3	6	1
3376	0	4	0	1	3	0		2	0	1	2	3	3	1	0	0	1	20	0	0	1		2	3	3	6	1
3391	0	4	0	1	3	0		1	1	0	1	3	3	1	1	0	0	20	0	0	1		1	3	3	6	1
3405	1	4	0	1	0	0	2	1	0	1	2	2	2	1	0	0	0	20	0	0	0	2	1	2	2	4	0
3412	1	4	0	1	0	1	2	1	0	0	2	3	2	1	0	0	0	20	0	0	0	2	1	3	2	5	0
3440	1	4	0	1	1	1		2	1	1	1	3	3	1	0	0	1	20	0	0	1		2	3	3	6	1
3448	0	4	0	1	0	0		2	0	1	2	3	3	1	0	0	1	20	0	0	1		2	3	3	6	1
3449	1	4	0	1	2	0	1	1	0	0	2	2	2	1	0	0	0	20	0	0	0	1	1	2	2	4	0
3454	0	4	0	1	0	0	3	3	0	1	2	3	2	1	0	0	1	20	0	0	1	3	3	3	2	5	1
3477	0	4	0	1	0	1	2	1	0	1	1	3	3	1	0	0	0	20	0	0	0	2	1	3	3	6	0
3493	0	4	0	1	0	1		2	1	1	1	3	3	1	0	0	1	20	0	0	1		2	3	3	6	1
3497	0	4	0	1	0	0	3	1	0	1	2	3	2	1	1	0	0	20	0	0	1	3	1	3	2	5	1
3525	1	4	0	1	2	0	2	1	0	0	2	2	2	1	0	0	0	20	0	0	0	2	1	2	2	4	0
3562	1	4	0	1	1	0	2	1	0	1	2	2	2	1	0	0	0	20	0	0	0	2	1	2	2	4	0
3572	0	4	0	1	1	1	2	1	1	0	2	2	1	1	0	0	0	20	0	0	0	2	1	2	1	3	0
3642	1	4	0	1	0	1	2	1	1	1	1	3	2	1	0	0	0	20	1	0	0	2	1	3	2	5	1
3658	0	4	0	1	0	0	3	1	0	1	2	3	2	1	1	0	0	20	0	0	1	3	1	3	2	5	1
3691	0	4	0	1	3	0		2	1	0	1	3	3	1	1	0	0	20	0	0	1		2	3	3	6	1
3705	1	4	0	1	2	1	2	1	0	1	2	3	2	1	0	0	0	20	0	0	0	2	1	3	2	5	0
3718	0	4	0	1	0	1	2	1	0	1	1	2	2	1	0	0	0	20	0	0	0	2	1	2	2	4	0
3728	1	4	0	1	0	0	3	1	0	0	2	3	2	1	0	0	0	20	0	0	0	3	1	3	2	5	0
3729	1	4	0	1	2	1		2	1	1	1	3	3	1	0	0	1	20	0	0	1		2	3	3	6	1
3737	1	4	0	1	0	1	2	1	0	0	2	3	2	1	0	0	0	20	0	0	0	2	1	3	2	5	0
3758	1	4	0	1	2	0	2	1	0	0	2	2	2	1	0	0	0	20	0	0	0	2	1	2	2	4	0
3763	1	4	0	1	1	1		2	1	1	1	3	3	1	0	0	1	20	0	0	1		2	3	3	6	1
3786	0	4	0	1	0	0	2	2	1	1	2	2	2	1	1	0	0	20	0	0	1	2	2	2	2	4	1
3816	1	4	0	1	0	1	2	1	1	0	2	2	1	1	0	0	0	20	0	0	0	2	1	2	1	3	0
3866	1	4	0	1	0	1	2	1	1	1	1	3	2	1	0	0	0	20	1	0	0	2	1	3	2	5	1
3876	0	4	0	1	0	0		2	0	1	2	3	3	1	0	0	1	20	0	0	1		2	3	3	6	1
3914	1	4	0	1	2	0	2	1	0	0	2	2	2	1	0	0	0	20	0	0	0	2	1	2	2	4	0
3920	0	4	0	1	0	0		2	0	1	2	3	3	1	0	0	1	20	0	0	1		2	3	3	6	1
3937	1	4	0	1	1	1	2	1	1	1	2	3	2	1	0	0	0	20	0	0	0	2	1	3	2	5	0
3942	0	4	0	1	0	0	2	1	1	0	2	2	2	1	1	0	0	20	0	0	1	2	1	2	2	4	1
3979	0	4	0	1	0	1	1	1	0	1	1	2	2	1	0	0	0	20	0	0	0	1	1	2	2	4	0
4000	0	4	0	1	0	0		2	0	1	2	3	3	1	0	0	1	20	0	0	1		2	3	3	6	1
4036	0	4	0	1	0	1	2	1	0	1	1	3	3	1	0	0	0	20	1	0	0	2	1	3	3	6	1
4046	1	4	0	1	0	1	2	1	0	0	2	3	2	1	0	0	0	20	0	0	0	2	1	3	2	5	0
4057	0	4	0	1	3	0		1	1	1	2	3	3	1	0	0	0	20	0	0	0		1	3	3	6	0
4070	0	4	0	1	0	0	2	2	1	1	2	2	2	1	1	0	0	20	0	0	1	2	2	2	2	4	1
4073	0	4	0	1	0	0	3	3	0	1	2	3	2	1	0	0	1	20	0	0	1	3	3	3	2	5	1
4076	1	4	0	1	2	1		2	1	1	1	3	3	1	0	0	1	20	0	0	1		2	3	3	6	1
4092	0	4	0	1	3	0		2	0	1	2	3	3	1	0	0	1	20	0	0	1		2	3	3	6	1
4103	0	4	0	1	0	0	3	3	0	1	2	3	2	1	0	0	1	20	0	0	1	3	3	3	2	5	1
4118	1	4	0	1	0	1	2	1	0	0	2	3	2	1	0	0	0	20	0	0	0	2	1	3	2	5	0
4198	1	4	0	1	2	0	2	1	0	0	2	2	2	1	0	0	0	20	0	0	0	2	1	2	2	4	0
4221	0	4	0	1	0	1	2	1	0	1	1	3	2	1	0	0	0	20	1	0	0	2	1	3	2	5	1
4233	0	4	0	1	0	0	3	2	0	1	2	3	2	1	1	0	0	20	0	0	1	3	2	3	2	5	1
4254	1	4	0	1	1	1		2	1	1	1	3	3	1	0	0	1	20	0	0	1		2	3	3	6	1
4256	0	4	0	1	0	0	3	1	0	1	2	3	2	1	1	0	0	20	0	0	1	3	1	3	2	5	1
4272	0	4	0	1	0	0		2	0	1	2	3	3	1	0	0	1	20	0	0	1		2	3	3	6	1
4274	0	4	0	1	0	1	2	1	0	1	1	3	2	1	0	0	0	20	1	0	0	2	1	3	2	5	1
4279	0	4	0	1	3	0		2	0	1	2	3	3	1	0	0	1	20	0	0	1		2	3	3	6	1
4294	1	4	0	1	0	0	2	1	0	1	2	2	2	1	0	0	0	20	0	0	0	2	1	2	2	4	0
4304	0	4	0	1	1	1	2	1	1	1	2	3	2	1	0	0	0	20	0	0	0	2	1	3	2	5	0
4311	1	4	0	1	1	1	2	1	1	1	2	3	2	1	0	0	0	20	0	0	0	2	1	3	2	5	0
4313	0	4	0	1	3	0		2	1	0	1	3	3	1	1	0	0	20	0	0	1		2	3	3	6	1
4325	0	4	0	1	3	0		2	0	1	2	3	3	1	0	0	1	20	0	0	1		2	3	3	6	1
4344	1	4	0	1	2	0	2	1	0	0	2	2	2	1	0	0	0	20	0	0	0	2	1	2	2	4	0
4355	0	4	0	1	0	0	2	1	0	1	2	2	2	1	0	0	0	20	0	0	0	2	1	2	2	4	0
4360	1	4	0	1	1	0	2	1	0	1	2	2	2	1	0	0	0	20	0	0	0	2	1	2	2	4	0
4369	1	4	0	1	0	1	2	1	0	0	2	3	2	1	0	0	0	20	0	0	0	2	1	3	2	5	0
4383	0	4	0	1	0	0		2	0	1	2	3	3	1	0	0	1	20	0	0	1		2	3	3	6	1
4404	1	4	0	1	2	0	1	1	0	0	2	2	2	1	0	0	0	20	0	0	0	1	1	2	2	4	0
4409	1	4	0	1	2	0	2	1	0	0	2	2	2	1	0	0	0	20	0	0	0	2	1	2	2	4	0
4429	0	4	0	1	0	1	2	1	0	1	1	2	2	1	0	0	0	20	1	0	0	2	1	2	2	4	1
4435	1	4	0	1	1	1		2	1	1	1	3	3	1	0	0	1	20	0	0	1		2	3	3	6	1
4441	0	4	0	1	3	0		1	1	1	2	3	3	1	0	0	0	20	0	0	0		1	3	3	6	0
4465	0	4	0	1	0	1	2	1	0	1	1	2	2	1	0	0	0	20	0	0	0	2	1	2	2	4	0
4486	1	4	0	1	2	0	2	1	0	0	2	2	2	1	0	0	0	20	0	0	0	2	1	2	2	4	0
4498	1	4	0	1	1	1		2	1	1	1	3	3	1	0	0	1	20	0	0	1		2	3	3	6	1
4500	0	4	0	1	1	0	3	2	0	0	2	2	1	1	0	0	0	20	0	0	0	3	2	2	1	3	0
4505	0	4	0	1	0	1	2	1	1	1	1	3	2	1	0	0	0	20	1	0	0	2	1	3	2	5	1
4515	0	4	0	1	0	0	3	3	0	1	2	3	2	1	0	0	1	20	0	0	1	3	3	3	2	5	1
4518	0	4	0	1	0	0	3	3	0	1	2	3	2	1	0	0	1	20	0	0	1	3	3	3	2	5	1
4520	0	4	0	1	0	0		2	0	1	2	3	3	1	0	0	1	20	0	0	1		2	3	3	6	1
4532	0	4	0	1	0	1		2	1	1	1	3	3	1	0	0	1	20	0	0	1		2	3	3	6	1
4544	1	4	0	1	0	0	2	1	0	1	2	2	2	1	0	0	0	20	0	0	0	2	1	2	2	4	0
4553	0	4	0	1	3	0		1	1	0	2	3	3	1	0	0	0	20	0	0	0		1	3	3	6	0
4608	0	4	0	1	0	1	2	1	0	1	1	3	2	1	0	0	0	20	1	0	0	2	1	3	2	5	1
4632	0	4	0	1	0	1	2	1	0	0	1	2	2	1	0	0	0	20	0	0	0	2	1	2	2	4	0
4635	0	4	0	1	3	0		1	1	1	2	3	3	1	0	0	0	20	0	0	0		1	3	3	6	0
4636	1	4	0	1	1	1	2	1	1	1	2	3	2	1	0	0	0	20	0	0	0	2	1	3	2	5	0
4658	1	4	0	1	1	1		2	1	1	1	3	3	1	0	0	1	20	0	0	1		2	3	3	6	1
4664	0	4	0	1	0	0		2	0	1	2	3	3	1	0	0	1	20	0	0	1		2	3	3	6	1
4695	0	4	0	1	0	1		2	1	1	1	3	3	1	0	0	1	20	0	0	1		2	3	3	6	1
4701	1	4	0	1	0	0	2	1	0	1	2	2	2	1	0	0	0	20	0	0	0	2	1	2	2	4	0
4708	0	4	0	1	0	0	3	2	1	0	2	3	2	1	1	0	0	20	0	0	1	3	2	3	2	5	1
4780	0	4	0	1	0	0	2	1	0	0	2	3	3	1	0	0	0	20	0	0	0	2	1	3	3	6	0
4781	0	4	0	1	0	0		2	0	1	2	3	3	1	1	0	0	20	0	0	1		2	3	3	6	1
4801	0	4	0	1	0	1	2	1	0	1	1	3	2	1	0	0	0	20	1	0	0	2	1	3	2	5	1
4817	0	4	0	1	3	0		1	1	1	2	3	3	1	1	0	0	20	0	0	1		1	3	3	6	1
4818	0	4	0	1	3	0		1	1	0	2	3	3	1	0	0	0	20	0	0	0		1	3	3	6	0
4838	1	4	0	1	1	1		2	1	1	1	3	3	1	0	0	1	20	0	0	1		2	3	3	6	1
4841	0	4	0	1	0	1	2	1	1	1	1	3	2	1	0	0	0	20	1	0	0	2	1	3	2	5	1
4854	0	4	0	1	3	0		1	1	0	2	3	3	1	0	0	0	20	0	0	0		1	3	3	6	0
4875	0	4	0	1	4	1	2	1	0	1	2	3	2	1	0	0	0	20	0	0	0	2	1	3	2	5	0
4890	1	4	0	1	2	1	2	1	0	1	2	3	2	1	0	0	0	20	0	0	0	2	1	3	2	5	0
4899	0	4	0	1	1	0	3	2	0	0	2	2	1	1	0	0	0	20	0	0	0	3	2	2	1	3	0
4913	1	4	0	1	2	0	2	1	0	0	2	2	2	1	0	0	0	20	0	0	0	2	1	2	2	4	0
4917	1	4	0	1	1	1		2	1	1	1	3	3	1	0	0	1	20	0	0	1		2	3	3	6	1
4975	0	4	0	1	0	1		2	1	1	1	3	3	1	0	0	1	20	0	0	1		2	3	3	6	1
4999	0	4	0	1	0	1	3	1	0	1	1	3	3	1	0	0	0	20	1	0	0	3	1	3	3	6	1
5002	0	4	0	1	0	1	2	1	0	1	1	2	2	1	0	0	0	20	0	0	0	2	1	2	2	4	0
5009	0	4	0	1	0	1		2	1	1	1	3	3	1	0	0	1	20	0	0	1		2	3	3	6	1
5023	1	4	0	1	2	0	2	1	0	0	2	2	2	1	0	0	0	20	0	0	0	2	1	2	2	4	0
5026	0	4	0	1	3	0		1	1	1	2	3	3	1	0	0	0	20	0	0	0		1	3	3	6	0
5036	0	4	0	1	0	0	3	3	0	1	2	3	2	1	0	0	1	20	0	0	1	3	3	3	2	5	1
5046	0	4	0	1	0	0	3	2	0	0	2	2	1	1	0	0	0	20	0	0	0	3	2	2	1	3	0
5051	1	4	0	1	2	0	1	1	0	0	2	2	2	1	0	0	0	20	0	0	0	1	1	2	2	4	0
5057	0	4	0	1	3	0		2	0	1	2	3	3	1	0	0	1	20	0	0	1		2	3	3	6	1
5072	0	4	0	1	3	0		2	0	1	2	3	3	1	0	0	1	20	0	0	1		2	3	3	6	1
5085	0	4	0	1	3	0		1	1	1	2	3	3	1	0	0	0	20	0	0	0		1	3	3	6	0
5093	0	4	0	1	3	0		1	1	1	2	3	3	1	0	0	0	20	0	0	0		1	3	3	6	0
5110	0	4	0	1	3	0		1	1	1	2	3	3	1	1	0	0	20	0	0	1		1	3	3	6	1
5125	1	4	0	1	2	0	1	1	0	0	2	2	2	1	0	0	0	20	0	0	0	1	1	2	2	4	0
5133	0	4	0	1	0	0		2	0	1	2	3	3	1	0	0	1	20	0	0	1		2	3	3	6	1
5155	1	4	0	1	2	1	2	1	0	1	2	3	2	1	0	0	0	20	0	0	0	2	1	3	2	5	0
5159	1	4	0	1	0	1	2	1	1	0	2	2	1	1	0	0	0	20	0	0	0	2	1	2	1	3	0
5160	0	4	0	1	3	0		1	1	1	2	3	3	1	0	0	0	20	0	0	0		1	3	3	6	0
5170	1	4	0	1	0	1	2	1	0	0	2	3	2	1	0	0	0	20	0	0	0	2	1	3	2	5	0
5172	0	4	0	1	0	0	2	1	0	0	2	3	3	1	0	0	0	20	0	0	0	2	1	3	3	6	0
5220	0	4	0	1	0	1	2	1	0	1	1	2	2	1	0	0	0	20	0	0	0	2	1	2	2	4	0
5249	1	4	0	1	0	0	2	1	0	1	2	2	2	1	0	0	0	20	0	0	0	2	1	2	2	4	0
5251	0	4	0	1	3	0		2	1	0	1	3	3	1	1	0	0	20	0	0	1		2	3	3	6	1
5258	0	4	0	1	0	1	2	1	0	1	1	2	2	1	0	0	0	20	1	0	0	2	1	2	2	4	1
5268	0	4	0	1	0	1	2	1	0	1	1	2	2	1	0	0	0	20	0	0	0	2	1	2	2	4	0
5271	0	4	0	1	0	0		2	0	1	2	3	3	1	0	0	1	20	0	0	1		2	3	3	6	1
5272	0	4	0	1	0	0	3	3	0	1	2	3	2	1	0	0	1	20	0	0	1	3	3	3	2	5	1
5298	1	4	0	1	1	1		2	1	1	1	3	3	1	0	0	1	20	0	0	1		2	3	3	6	1
5303	0	4	0	1	0	0	3	2	1	0	2	3	2	1	1	0	0	20	0	0	1	3	2	3	2	5	1
5348	0	4	0	1	0	0	2	2	1	1	2	2	2	1	1	0	0	20	0	0	1	2	2	2	2	4	1
5398	0	4	0	1	3	0		2	0	1	2	3	3	1	0	0	1	20	0	0	1		2	3	3	6	1
5399	1	4	0	1	1	1		2	1	1	1	3	3	1	0	0	1	20	0	0	1		2	3	3	6	1
5406	0	4	0	1	0	0	2	1	1	0	2	2	2	1	1	0	0	20	0	0	1	2	1	2	2	4	1
5418	0	4	0	1	3	0		1	1	0	2	3	3	1	0	0	0	20	0	0	0		1	3	3	6	0
5457	0	4	0	1	0	1		2	1	1	1	3	3	1	0	0	1	20	0	0	1		2	3	3	6	1
5467	0	4	0	1	1	0	3	2	0	0	2	2	1	1	0	0	0	20	0	0	0	3	2	2	1	3	0
5492	1	4	0	1	0	1	2	1	0	0	2	3	2	1	0	0	0	20	0	0	0	2	1	3	2	5	0
5499	0	4	0	1	0	0	2	1	0	0	2	2	1	1	0	0	0	20	0	0	0	2	1	2	1	3	0
5524	1	4	0	1	0	1	2	1	0	0	2	3	2	1	0	0	0	20	0	0	0	2	1	3	2	5	0
5534	0	4	0	1	0	1	2	1	0	1	1	2	2	1	0	0	0	20	0	0	0	2	1	2	2	4	0
5542	1	4	0	1	2	1		2	1	1	1	3	3	1	0	0	1	20	0	0	1		2	3	3	6	1
5547	0	4	0	1	0	0		2	0	1	2	3	3	1	0	0	1	20	0	0	1		2	3	3	6	1
5550	0	4	0	1	0	0		2	0	1	2	3	3	1	0	0	1	20	0	0	1		2	3	3	6	1
5559	1	4	0	1	0	1	2	1	0	0	2	3	2	1	0	0	0	20	0	0	0	2	1	3	2	5	0
5580	0	4	0	1	0	1	2	1	0	1	1	2	2	1	0	0	0	20	0	0	0	2	1	2	2	4	0
5588	0	4	0	1	0	0		2	0	1	2	3	3	1	0	0	1	20	0	0	1		2	3	3	6	1
5622	0	4	0	1	4	1	2	1	0	1	2	3	2	1	0	0	0	20	0	0	0	2	1	3	2	5	0
5638	0	4	0	1	1	0	3	2	0	0	2	2	1	1	0	0	0	20	0	0	0	3	2	2	1	3	0
5645	0	4	0	1	1	1	2	1	1	1	2	3	2	1	0	0	0	20	0	0	0	2	1	3	2	5	0
5680	0	4	0	1	0	1		2	1	1	1	3	3	1	0	0	1	20	0	0	1		2	3	3	6	1
5702	0	4	0	1	3	0		1	1	1	2	3	3	1	1	0	0	20	0	0	1		1	3	3	6	1
5704	0	4	0	1	0	1		2	1	1	1	3	3	1	0	0	1	20	0	0	1		2	3	3	6	1
5705	0	4	0	1	3	0		1	1	0	2	3	3	1	0	0	0	20	0	0	0		1	3	3	6	0
5717	0	4	0	1	0	1	3	1	1	1	1	3	3	1	0	0	0	20	1	0	0	3	1	3	3	6	1
5719	0	4	0	1	3	0		2	0	1	2	3	3	1	0	0	1	20	0	0	1		2	3	3	6	1
5735	1	4	0	1	0	0	2	1	0	1	2	2	2	1	0	0	0	20	0	0	0	2	1	2	2	4	0
5750	0	4	0	1	0	1	2	1	0	1	1	3	3	1	0	0	0	20	1	0	0	2	1	3	3	6	1
5752	1	4	0	1	2	0	1	1	0	0	2	2	2	1	0	0	0	20	0	0	0	1	1	2	2	4	0
5781	0	4	0	1	0	1		2	1	1	1	3	3	1	0	0	1	20	0	0	1		2	3	3	6	1
5802	0	4	0	1	0	1	2	1	0	1	1	3	3	1	0	0	0	20	1	0	0	2	1	3	3	6	1
5836	1	4	0	1	2	0	1	1	0	0	2	2	2	1	0	0	0	20	0	0	0	1	1	2	2	4	0
5840	0	4	0	1	0	0	3	1	0	1	2	3	2	1	1	0	0	20	0	0	1	3	1	3	2	5	1
5844	0	4	0	1	3	0		1	1	0	1	3	3	1	1	0	0	20	0	0	1		1	3	3	6	1
5848	0	4	0	1	0	0	2	1	0	0	2	2	1	1	0	0	0	20	0	0	0	2	1	2	1	3	0
5861	0	4	0	1	0	0	3	3	0	1	2	3	2	1	0	0	1	20	0	0	1	3	3	3	2	5	1
5876	1	4	0	1	1	0	2	1	0	1	2	2	2	1	0	0	0	20	0	0	0	2	1	2	2	4	0
5884	0	4	0	1	3	0		1	1	0	2	3	3	1	0	0	0	20	0	0	0		1	3	3	6	0
5907	0	4	0	1	0	0	2	1	0	0	2	2	1	1	0	0	0	20	0	0	0	2	1	2	1	3	0
5957	0	4	0	1	0	0	2	1	1	0	2	2	2	1	1	0	0	20	0	0	1	2	1	2	2	4	1
5959	1	4	0	1	1	0	2	1	0	1	2	2	2	1	0	0	0	20	0	0	0	2	1	2	2	4	0
5961	1	4	0	1	2	1	2	1	0	1	2	3	2	1	0	0	0	20	0	0	0	2	1	3	2	5	0
6417	0	4	0	1	0	0	3	2	1	0	2	3	2	2	1	0	0	20	0	0	1	3	2	3	2	5	1
42	0	5	0	1	3	1	2	1	0	1	1	2	2	1	0	0	1	20	0	1	1	2	1	2	2	4	1
52	0	5	0	1	1	0	3	3	1	0	2	3	3	1	0	0	0	20	0	1	0	3	3	3	3	6	0
70	0	5	0	1	1	0	3	3	1	0	2	3	3	1	0	0	0	20	0	1	0	3	3	3	3	6	0
90	0	5	0	1	0	1	2	1	0	0	2	2	2	1	0	0	0	20	0	1	0	2	1	2	2	4	0
108	0	5	0	1	3	1	2	1	0	1	1	2	2	1	0	0	1	20	0	1	1	2	1	2	2	4	1
138	0	5	0	1	3	1	2	2	0	1	1	2	2	1	0	0	1	20	0	1	1	2	2	2	2	4	1
172	0	5	0	1	3	1	2	1	0	1	1	2	2	1	0	0	1	20	0	1	1	2	1	2	2	4	1
231	0	5	0	1	3	1	2	1	0	1	1	2	2	1	0	0	1	20	0	1	1	2	1	2	2	4	1
232	0	5	0	1	3	1	2	2	0	1	1	2	2	1	0	0	1	20	0	1	1	2	2	2	2	4	1
235	0	5	0	1	3	1	2	1	0	1	1	2	2	1	0	0	1	20	0	1	1	2	1	2	2	4	1
261	0	5	0	1	1	0	3	3	1	0	2	3	3	1	0	0	0	20	0	1	0	3	3	3	3	6	0
266	0	5	0	1	0	1	2	1	0	1	2	2	2	1	0	0	0	20	0	1	0	2	1	2	2	4	0
283	0	5	0	1	3	1	2	2	0	1	1	2	2	1	0	0	1	20	0	1	1	2	2	2	2	4	1
286	0	5	0	1	3	1	2	1	0	1	1	2	2	1	0	0	1	20	0	1	1	2	1	2	2	4	1
306	0	5	0	1	0	1	2	1	0	0	2	2	2	1	0	0	0	20	0	1	0	2	1	2	2	4	0
361	0	5	0	1	1	0	2	1	1	0	2	2	2	1	0	0	0	20	0	1	0	2	1	2	2	4	0
596	0	5	0	1	0	1	2	1	0	0	2	2	2	1	0	0	0	20	0	1	0	2	1	2	2	4	0
678	0	5	0	1	0	1	2	1	0	0	2	2	2	1	0	0	0	20	0	1	0	2	1	2	2	4	0
786	0	5	0	1	3	1	2	2	0	1	1	2	2	1	0	0	1	20	0	1	1	2	2	2	2	4	1
863	0	5	0	1	0	1	2	1	0	0	2	2	2	1	0	0	0	20	0	1	0	2	1	2	2	4	0
866	0	5	0	1	3	1	2	2	0	1	1	2	2	1	0	0	1	20	0	1	1	2	2	2	2	4	1
872	0	5	0	1	0	1	2	1	0	1	2	2	2	1	0	0	0	20	0	1	0	2	1	2	2	4	0
919	0	5	0	1	0	1	2	1	0	1	2	2	2	1	0	0	0	20	0	1	0	2	1	2	2	4	0
949	0	5	0	1	1	0	3	3	1	0	2	3	3	1	0	0	0	20	0	1	0	3	3	3	3	6	0
970	0	5	0	1	0	1	2	1	0	0	2	2	2	1	0	0	0	20	0	1	0	2	1	2	2	4	0
1065	0	5	0	1	3	1	2	2	0	1	1	2	2	1	0	0	1	20	0	1	1	2	2	2	2	4	1
1071	0	5	0	1	1	0	3	3	1	0	2	3	3	1	0	0	0	20	0	1	0	3	3	3	3	6	0
1086	0	5	0	1	3	1	2	1	0	1	1	2	2	1	0	0	1	20	0	1	1	2	1	2	2	4	1
1093	0	5	0	1	0	1	2	1	0	1	2	2	2	1	0	0	0	20	0	1	0	2	1	2	2	4	0
1145	0	5	0	1	1	0	2	1	1	0	2	2	2	1	0	0	0	20	0	1	0	2	1	2	2	4	0
1149	0	5	0	1	1	0	3	3	1	0	2	3	3	1	0	0	0	20	0	1	0	3	3	3	3	6	0
1154	0	5	0	1	0	1	2	1	0	0	2	2	2	1	0	0	0	20	0	1	0	2	1	2	2	4	0
1225	0	5	0	1	3	1	2	2	0	1	1	2	2	1	0	0	1	20	0	1	1	2	2	2	2	4	1
1382	0	5	0	1	3	1	2	3	0	1	1	3	3	2	0	0	1	20	0	1	1	2	3	3	3	6	1
1506	0	5	0	1	4	0	3	3	0	0	2	3	3	1	0	0	0	20	0	0	0	3	3	3	3	6	0
1520	0	5	0	1	0	1	2	1	0	0	2	2	2	1	0	0	0	20	0	0	0	2	1	2	2	4	0
1547	0	5	0	1	1	0	3	3	1	0	2	3	3	1	0	0	0	20	0	0	0	3	3	3	3	6	0
1557	0	5	0	1	1	0	3	3	1	0	2	3	3	1	0	0	0	20	0	0	0	3	3	3	3	6	0
1576	0	5	0	1	3	1	2	1	0	1	1	2	2	1	0	0	1	20	0	0	1	2	1	2	2	4	1
1659	0	5	0	1	3	1	2	1	0	1	1	2	2	1	0	0	1	20	0	0	1	2	1	2	2	4	1
1663	0	5	0	1	3	1	2	1	0	1	1	2	2	1	0	0	1	20	0	0	1	2	1	2	2	4	1
1673	0	5	0	1	3	1	2	1	0	1	1	2	2	1	0	0	1	20	0	0	1	2	1	2	2	4	1
1690	0	5	0	1	3	1	2	1	0	1	1	2	2	1	0	0	1	20	0	0	1	2	1	2	2	4	1
1695	0	5	0	1	0	1	2	1	0	0	2	2	2	1	0	0	0	20	0	0	0	2	1	2	2	4	0
1717	0	5	0	1	3	1	2	1	0	1	1	2	2	1	0	0	1	20	0	0	1	2	1	2	2	4	1
1734	0	5	0	1	3	1	2	1	0	1	1	2	2	1	0	0	1	20	0	0	1	2	1	2	2	4	1
1742	0	5	0	1	0	1	2	1	0	1	2	2	2	1	0	0	0	20	0	0	0	2	1	2	2	4	0
1743	0	5	0	1	1	0	3	3	1	0	2	3	3	1	0	0	0	20	0	0	0	3	3	3	3	6	0
1745	0	5	0	1	4	0	3	3	0	0	2	3	3	1	0	0	0	20	0	0	0	3	3	3	3	6	0
1843	1	5	0	1	1	0	3	3	1	0	2	3	3	1	0	0	0	20	0	0	0	3	3	3	3	6	0
1923	0	5	0	1	3	1	2	1	0	1	1	2	2	1	0	0	1	20	0	0	1	2	1	2	2	4	1
1925	0	5	0	1	0	1	2	1	0	0	2	2	2	1	0	0	0	20	0	0	0	2	1	2	2	4	0
1936	0	5	0	1	0	1	2	1	0	0	2	2	2	1	0	0	0	20	0	0	0	2	1	2	2	4	0
1946	0	5	0	1	3	1	2	1	0	1	1	2	2	1	0	0	1	20	0	0	1	2	1	2	2	4	1
2004	0	5	0	1	1	0	3	3	1	0	2	3	3	1	0	0	0	20	0	0	0	3	3	3	3	6	0
2087	0	5	0	1	1	0	3	3	1	0	2	3	3	1	0	0	0	20	0	0	0	3	3	3	3	6	0
2123	1	5	0	1	4	0	3	3	0	0	2	3	3	1	0	0	0	20	0	0	0	3	3	3	3	6	0
2127	0	5	0	1	3	1	2	2	0	1	1	2	2	1	0	0	1	20	0	0	1	2	2	2	2	4	1
2233	0	5	0	1	1	0	3	3	1	0	2	3	3	1	0	0	0	20	0	0	0	3	3	3	3	6	0
2252	0	5	0	1	0	1	2	1	0	1	2	2	2	1	0	0	0	20	0	0	0	2	1	2	2	4	0
2313	0	5	0	1	0	1	2	1	0	1	2	2	2	1	0	0	0	20	0	0	0	2	1	2	2	4	0
2344	0	5	0	1	4	0	3	3	0	0	2	3	3	1	0	0	0	20	0	0	0	3	3	3	3	6	0
2371	0	5	0	1	1	0	1	1	1	0	2	2	2	1	0	0	0	20	0	0	0	1	1	2	2	4	0
2422	0	5	0	1	1	0	2	1	1	0	2	2	2	1	0	0	0	20	0	0	0	2	1	2	2	4	0
2453	0	5	0	1	0	1	2	1	0	1	2	2	2	1	0	0	0	20	0	0	0	2	1	2	2	4	0
2458	0	5	0	1	4	0	3	3	0	0	2	3	3	1	0	0	0	20	0	0	0	3	3	3	3	6	0
2563	0	5	0	1	3	1	2	1	0	1	1	2	2	1	0	0	1	20	0	0	1	2	1	2	2	4	1
2590	0	5	0	1	1	0	3	3	1	0	2	3	3	1	0	0	0	20	0	0	0	3	3	3	3	6	0
2730	0	5	0	1	0	1	2	1	0	1	2	2	2	1	0	0	0	20	0	0	0	2	1	2	2	4	0
2740	0	5	0	1	1	0	3	3	1	0	2	3	3	1	0	0	0	20	0	0	0	3	3	3	3	6	0
2898	0	5	0	1	0	1	2	1	0	1	2	2	2	1	0	0	0	20	0	0	0	2	1	2	2	4	0
2899	0	5	0	1	3	1	2	1	0	1	1	2	2	1	0	0	1	20	0	0	1	2	1	2	2	4	1
2965	1	5	0	1	4	0	3	3	0	0	2	3	3	1	0	0	0	20	0	0	0	3	3	3	3	6	0
2971	0	5	0	1	4	0	3	3	0	0	2	3	3	1	0	0	0	20	0	0	0	3	3	3	3	6	0
2986	0	5	0	1	1	0	3	3	1	0	2	3	3	1	0	0	0	20	0	0	0	3	3	3	3	6	0
3104	0	5	0	1	3	1	2	2	0	1	1	2	2	1	0	0	1	20	0	0	1	2	2	2	2	4	1
3153	0	5	0	1	0	1	2	1	0	0	2	2	2	1	0	0	0	20	0	0	0	2	1	2	2	4	0
3159	0	5	0	1	3	1	2	1	0	1	1	2	2	1	0	0	1	20	0	0	1	2	1	2	2	4	1
3174	0	5	0	1	3	1	2	1	0	1	1	2	2	1	0	0	1	20	0	0	1	2	1	2	2	4	1
3188	0	5	0	1	3	1	2	1	0	1	1	2	2	1	0	0	1	20	0	0	1	2	1	2	2	4	1
3210	0	5	0	1	3	1	2	1	0	1	1	2	2	1	0	0	1	20	0	0	1	2	1	2	2	4	1
3253	0	5	0	1	0	1	2	1	0	0	2	2	2	1	0	0	0	20	0	0	0	2	1	2	2	4	0
3303	0	5	0	1	4	0	3	3	0	0	2	3	3	1	0	0	0	20	0	0	0	3	3	3	3	6	0
3364	0	5	0	1	1	0	3	3	1	0	2	3	3	1	0	0	0	20	0	0	0	3	3	3	3	6	0
3476	0	5	0	1	1	0	3	3	1	0	2	3	3	1	0	0	0	20	0	0	0	3	3	3	3	6	0
3626	0	5	0	1	1	0	3	3	1	0	2	3	3	1	0	0	0	20	0	0	0	3	3	3	3	6	0
3670	1	5	0	1	4	0	3	3	0	0	2	3	3	1	0	0	0	20	0	0	0	3	3	3	3	6	0
3689	0	5	0	1	3	1	2	1	0	1	1	2	2	1	0	0	1	20	0	0	1	2	1	2	2	4	1
4020	0	5	0	1	3	1	2	1	0	1	1	2	2	1	0	0	1	20	0	0	1	2	1	2	2	4	1
4041	1	5	0	1	4	0	3	3	0	0	2	3	3	1	0	0	0	20	0	0	0	3	3	3	3	6	0
4050	0	5	0	1	0	1	2	1	0	0	2	2	2	1	0	0	0	20	0	0	0	2	1	2	2	4	0
4113	0	5	0	1	3	1	2	1	0	1	1	2	2	1	0	0	1	20	0	0	1	2	1	2	2	4	1
4144	0	5	0	1	4	0	3	3	0	0	2	3	3	1	0	0	0	20	0	0	0	3	3	3	3	6	0
4171	0	5	0	1	4	0	3	3	0	0	2	3	3	1	0	0	0	20	0	0	0	3	3	3	3	6	0
4213	0	5	0	1	1	0	2	1	1	0	2	2	2	1	0	0	0	20	0	0	0	2	1	2	2	4	0
4250	0	5	0	1	0	1	2	1	0	1	2	2	2	1	0	0	0	20	0	0	0	2	1	2	2	4	0
4260	1	5	0	1	1	0	3	3	1	0	2	3	3	1	0	0	0	20	0	0	0	3	3	3	3	6	0
4267	0	5	0	1	3	1	2	1	0	1	1	2	2	1	0	0	1	20	0	0	1	2	1	2	2	4	1
4283	0	5	0	1	3	1	2	1	0	1	1	2	2	1	0	0	1	20	0	0	1	2	1	2	2	4	1
4285	0	5	0	1	3	1	2	1	0	1	1	2	2	1	0	0	1	20	0	0	1	2	1	2	2	4	1
4334	0	5	0	1	0	1	2	1	0	0	2	2	2	1	0	0	0	20	0	0	0	2	1	2	2	4	0
4362	0	5	0	1	0	1	2	1	0	0	2	2	2	1	0	0	0	20	0	0	0	2	1	2	2	4	0
4398	0	5	0	1	3	1	2	1	0	1	1	2	2	1	0	0	1	20	0	0	1	2	1	2	2	4	1
4403	0	5	0	1	0	1	2	1	0	0	2	2	2	1	0	0	0	20	0	0	0	2	1	2	2	4	0
4453	0	5	0	1	0	1	2	1	0	0	2	2	2	1	0	0	0	20	0	0	0	2	1	2	2	4	0
4501	0	5	0	1	4	0	3	3	0	0	2	3	3	1	0	0	0	20	0	0	0	3	3	3	3	6	0
4575	0	5	0	1	0	1	2	1	0	1	2	2	2	1	0	0	0	20	0	0	0	2	1	2	2	4	0
4640	0	5	0	1	1	0	3	3	1	0	2	3	3	1	0	0	0	20	0	0	0	3	3	3	3	6	0
4653	0	5	0	1	1	0	3	3	1	0	2	3	3	1	0	0	0	20	0	0	0	3	3	3	3	6	0
4735	0	5	0	1	3	1	2	1	0	1	1	2	2	1	0	0	1	20	0	0	1	2	1	2	2	4	1
4775	0	5	0	1	0	1	2	1	0	1	2	2	2	1	0	0	0	20	0	0	0	2	1	2	2	4	0
4856	0	5	0	1	3	1	2	1	0	1	1	2	2	1	0	0	1	20	0	0	1	2	1	2	2	4	1
4868	0	5	0	1	1	0	3	3	1	0	2	3	3	1	0	0	0	20	0	0	0	3	3	3	3	6	0
4885	0	5	0	1	0	1	2	1	0	0	2	2	2	1	0	0	0	20	0	0	0	2	1	2	2	4	0
4907	0	5	0	1	0	1	2	1	0	1	2	2	2	1	0	0	0	20	0	0	0	2	1	2	2	4	0
4914	0	5	0	1	3	1	2	1	0	1	1	2	2	1	0	0	1	20	0	0	1	2	1	2	2	4	1
4921	0	5	0	1	3	1	2	1	0	1	1	2	2	1	0	0	1	20	0	0	1	2	1	2	2	4	1
4951	0	5	0	1	3	1	2	1	0	1	1	2	2	1	0	0	1	20	0	0	1	2	1	2	2	4	1
4962	0	5	0	1	3	1	2	2	0	1	1	2	2	1	0	0	1	20	0	0	1	2	2	2	2	4	1
4984	0	5	0	1	0	1	2	1	0	1	2	2	2	1	0	0	0	20	0	0	0	2	1	2	2	4	0
5053	0	5	0	1	0	1	2	1	0	0	2	2	2	1	0	0	0	20	0	0	0	2	1	2	2	4	0
5096	0	5	0	1	0	1	2	1	0	1	2	2	2	1	0	0	0	20	0	0	0	2	1	2	2	4	0
5119	0	5	0	1	3	1	2	1	0	1	1	2	2	1	0	0	1	20	0	0	1	2	1	2	2	4	1
5168	0	5	0	1	1	0	2	1	1	0	2	2	2	1	0	0	0	20	0	0	0	2	1	2	2	4	0
5206	0	5	0	1	1	0	3	3	1	0	2	3	3	1	0	0	0	20	0	0	0	3	3	3	3	6	0
5210	0	5	0	1	1	0	3	3	1	0	2	3	3	1	0	0	0	20	0	0	0	3	3	3	3	6	0
5244	0	5	0	1	3	1	2	2	0	1	1	2	2	1	0	0	1	20	0	0	1	2	2	2	2	4	1
5317	0	5	0	1	1	0	3	3	1	0	2	3	3	1	0	0	0	20	0	0	0	3	3	3	3	6	0
5410	0	5	0	1	3	1	2	1	0	1	1	2	2	1	0	0	1	20	0	0	1	2	1	2	2	4	1
5447	0	5	0	1	3	1	2	1	0	1	1	2	2	1	0	0	1	20	0	0	1	2	1	2	2	4	1
5726	0	5	0	1	3	1	2	1	0	1	1	2	2	1	0	0	1	20	0	0	1	2	1	2	2	4	1
5862	0	5	0	1	0	1	2	1	0	0	2	2	2	1	0	0	0	20	0	0	0	2	1	2	2	4	0
5919	0	5	0	1	3	1	2	1	0	1	1	2	2	1	0	0	1	20	0	0	1	2	1	2	2	4	1
5945	0	5	0	1	3	1	2	1	0	1	1	2	2	1	0	0	1	20	0	0	1	2	1	2	2	4	1
6390	0	5	0	1	1	0	2	1	1	0	2	2	2	2	0	0	0	20	0	0	0	2	1	2	2	4	0
6394	0	5	0	1	3	1	2	1	0	1	1	2	2	2	0	0	1	20	0	0	1	2	1	2	2	4	1
6396	0	5	0	1	3	1	2	3	0	1	1	3	3	2	0	0	1	20	0	0	1	2	3	3	3	6	1
6402	0	5	0	1	3	1	2	3	0	1	1	3	3	2	0	0	1	20	0	0	1	2	3	3	3	6	1
6405	0	5	0	1	1	0	2	1	1	0	2	2	2	2	0	0	0	20	0	0	0	2	1	2	2	4	0
6425	0	5	0	1	3	1	2	1	0	1	1	2	2	2	0	0	1	20	0	0	1	2	1	2	2	4	1
6456	0	5	0	1	3	1	2	3	0	1	1	3	3	2	0	0	1	20	0	0	1	2	3	3	3	6	1
6471	0	5	0	1	3	1	2	3	0	1	1	3	3	2	0	0	1	20	0	0	1	2	3	3	3	6	1
6486	0	5	0	1	3	1	2	3	0	1	1	3	3	2	0	0	1	20	0	0	1	2	3	3	3	6	1
6493	0	5	0	1	0	1	2	1	0	0	2	2	2	2	0	0	0	20	0	0	0	2	1	2	2	4	0
6703	0	5	0	1	3	1	2	1	0	1	1	2	2	3	0	0	1	20	0	0	1	2	1	2	2	4	1
6704	0	5	0	1	3	1	2	1	0	1	1	2	2	3	0	0	1	20	0	0	1	2	1	2	2	4	1
6738	0	5	0	1	3	1	2	3	0	1	1	3	3	3	0	0	1	20	0	0	1	2	3	3	3	6	1
30	0	1	0	2	0	0	2	2	0	1	2	3	3	1	1	0	0	20	0	1	1	2	2	3	3	6	1
45	1	1	0	2	4	1	2	2	1	1	1	2	2	1	0	1	0	20	0	1	1	2	2	2	2	4	1
50	1	1	0	2	2	0	2	2	0	0	2	2	2	1	0	0	0	20	0	1	0	2	2	2	2	4	0
58	1	1	0	2	2	0	2	2	0	0	2	2	2	1	0	0	0	20	0	1	0	2	2	2	2	4	0
87	0	1	0	2	1	1	2	2	0	1	0	2	2	1	1	0	0	20	0	1	1	2	2	2	2	4	1
94	1	1	0	2	2	0	2	2	0	0	2	2	2	1	0	0	0	20	0	1	0	2	2	2	2	4	0
112	0	1	0	2	3	0	3	1	0	1	2	3	3	1	1	0	0	20	0	1	1	3	1	3	3	6	1
152	1	1	0	2	4	1	2	2	1	1	1	2	1	1	0	1	0	20	0	1	1	2	2	2	1	3	1
174	0	1	0	2	0	1	2	2	1	1	1	3	3	1	0	0	1	20	0	1	1	2	2	3	3	6	1
223	1	1	0	2	2	0	2	2	0	0	2	2	2	1	0	0	0	20	0	1	0	2	2	2	2	4	0
274	0	1	0	2	4	0	2	2	0	0	2	2	2	1	0	0	1	20	0	1	1	2	2	2	2	4	1
276	0	1	0	2	3	1	2	2	1	1	2	3	3	1	1	0	0	20	0	1	1	2	2	3	3	6	1
291	0	1	0	2	3	1	2	2	1	1	2	3	3	1	1	0	0	20	0	1	1	2	2	3	3	6	1
292	0	1	0	2	4	0	2	2	0	0	2	2	2	1	0	0	1	20	0	1	1	2	2	2	2	4	1
342	1	1	0	2	2	1	2	2	0	0	2	2	2	1	1	0	0	20	0	1	1	2	2	2	2	4	1
388	0	1	0	2	0	0	3	1	1	1	1	3	2	1	0	0	1	14	0	1	1	3	1	3	2	5	1
453	0	1	0	2	3	1	2	2	1	1	2	3	3	1	1	0	0	20	0	1	1	2	2	3	3	6	1
464	0	1	0	2	0	1	2	2	1	1	1	3	3	1	0	0	1	20	0	1	1	2	2	3	3	6	1
509	0	1	0	2	4	0	2	2	0	0	2	2	2	1	0	0	1	20	0	1	1	2	2	2	2	4	1
542	0	1	0	2	4	0	2	2	0	0	2	2	2	1	0	0	1	20	0	1	1	2	2	2	2	4	1
545	0	1	0	2	0	1	2	2	1	1	1	3	3	1	0	0	1	20	0	1	1	2	2	3	3	6	1
546	0	1	0	2	0	1	2	2	1	1	1	3	3	1	0	0	1	20	0	1	1	2	2	3	3	6	1
551	0	1	0	2	0	1	2	2	1	1	1	3	3	1	0	0	1	20	0	1	1	2	2	3	3	6	1
569	0	1	0	2	1	0	2	1	0	0	2	2	3	1	1	0	0	20	0	1	1	2	1	2	3	5	1
580	1	1	0	2	1	1	2	2	0	1	0	2	2	1	1	0	0	20	0	1	1	2	2	2	2	4	1
597	1	1	0	2	1	1	2	2	0	1	0	2	2	1	1	0	0	20	0	1	1	2	2	2	2	4	1
624	1	1	0	2	2	1	2	2	0	0	2	2	2	1	1	0	0	20	0	1	1	2	2	2	2	4	1
647	0	1	0	2	0	1	2	2	1	1	1	2	2	1	0	0	1	20	0	1	1	2	2	2	2	4	1
667	0	1	0	2	0	0	2	2	0	1	2	3	3	1	1	0	0	20	0	1	1	2	2	3	3	6	1
671	1	1	0	2	2	1	2	2	0	0	2	2	2	1	1	0	0	20	0	1	1	2	2	2	2	4	1
699	0	1	0	2	0	1	2	2	1	1	1	3	3	1	0	0	1	20	0	1	1	2	2	3	3	6	1
733	1	1	0	2	2	1	2	2	0	0	2	3	3	1	1	0	0	20	0	1	1	2	2	3	3	6	1
751	0	1	0	2	4	0	2	2	0	0	2	2	2	1	0	0	1	20	0	1	1	2	2	2	2	4	1
803	1	1	0	2	2	1	2	2	0	0	2	2	2	1	1	0	0	20	0	1	1	2	2	2	2	4	1
811	1	1	0	2	2	0	2	2	0	0	2	2	2	1	0	0	0	20	0	1	0	2	2	2	2	4	0
812	1	1	0	2	2	1	2	2	0	0	2	2	2	1	1	0	0	20	0	1	1	2	2	2	2	4	1
821	0	1	0	2	3	0	3	1	0	1	2	3	3	1	1	0	0	20	0	1	1	3	1	3	3	6	1
830	1	1	0	2	2	0	2	2	0	0	2	2	2	1	0	0	0	20	0	1	0	2	2	2	2	4	0
855	0	1	0	2	1	0	2	2	0	0	2	2	2	1	0	0	0	20	0	1	0	2	2	2	2	4	0
856	1	1	0	2	2	0	2	2	0	0	2	2	2	1	0	0	0	20	0	1	0	2	2	2	2	4	0
877	0	1	0	2	0	1	2	2	1	1	1	3	3	1	0	0	1	20	0	1	1	2	2	3	3	6	1
890	1	1	0	2	2	0	2	2	0	0	2	2	2	1	0	0	0	20	0	1	0	2	2	2	2	4	0
891	0	1	0	2	1	1	2	2	0	1	0	2	2	1	1	0	0	20	0	1	1	2	2	2	2	4	1
898	1	1	0	2	2	0	2	2	0	0	2	2	2	1	0	0	0	20	0	1	0	2	2	2	2	4	0
910	1	1	0	2	2	0	2	2	0	0	2	2	2	1	0	0	0	20	0	1	0	2	2	2	2	4	0
921	1	1	0	2	4	1	2	2	1	1	1	2	1	1	0	1	0	20	0	1	1	2	2	2	1	3	1
924	1	1	0	2	2	0	2	2	0	0	2	2	2	1	0	0	0	20	0	1	0	2	2	2	2	4	0
929	0	1	0	2	3	1	2	2	1	1	2	3	3	1	1	0	0	20	0	1	1	2	2	3	3	6	1
947	1	1	0	2	1	0	2	2	0	0	2	2	2	1	0	0	0	20	0	1	0	2	2	2	2	4	0
979	1	1	0	2	2	0	2	2	0	0	2	2	2	1	0	0	0	20	0	1	0	2	2	2	2	4	0
983	0	1	0	2	0	1	2	2	1	1	1	3	3	1	0	0	1	20	0	1	1	2	2	3	3	6	1
995	1	1	0	2	2	1	2	2	0	0	2	3	3	1	1	0	0	20	0	1	1	2	2	3	3	6	1
998	0	1	0	2	3	1	3	3	0	1	2	3	3	1	1	0	0	20	0	1	1	3	3	3	3	6	1
1000	1	1	0	2	2	0	2	2	0	0	2	2	2	1	0	0	0	20	0	1	0	2	2	2	2	4	0
1003	0	1	0	2	0	1	2	2	1	1	1	2	2	1	0	0	1	20	0	1	1	2	2	2	2	4	1
1007	1	1	0	2	1	1	2	2	0	1	0	2	2	1	1	0	0	20	0	1	1	2	2	2	2	4	1
1014	0	1	0	2	0	0	3	2	1	0	1	3	2	1	0	0	1	20	0	1	1	3	2	3	2	5	1
1025	0	1	0	2	1	0	2	1	0	0	2	2	3	1	1	0	0	20	0	1	1	2	1	2	3	5	1
1073	0	1	0	2	4	0	2	2	0	0	2	2	2	1	0	0	1	20	0	1	1	2	2	2	2	4	1
1098	0	1	0	2	1	0	2	2	0	0	2	2	2	1	0	0	0	20	0	1	0	2	2	2	2	4	0
1108	1	1	0	2	2	0	2	2	0	0	2	2	2	1	0	0	0	20	0	1	0	2	2	2	2	4	0
1123	0	1	0	2	0	1	2	2	1	1	1	3	3	1	0	0	1	20	0	1	1	2	2	3	3	6	1
1159	1	1	0	2	2	0	2	2	0	0	2	2	2	1	0	0	0	20	0	1	0	2	2	2	2	4	0
1168	1	1	0	2	2	1	2	2	0	0	2	2	2	1	1	0	0	20	0	1	1	2	2	2	2	4	1
1180	0	1	0	2	0	0	2	2	0	1	2	3	3	1	1	0	0	20	0	1	1	2	2	3	3	6	1
1235	0	1	0	2	0	0	2	2	0	1	2	3	3	1	1	0	0	20	0	1	1	2	2	3	3	6	1
1399	1	1	0	2	1	0	2	2	0	0	2	2	2	2	0	0	0	20	0	1	0	2	2	2	2	4	0
1491	0	1	0	2	1	1	2	2	0	1	0	2	2	1	1	0	0	20	0	0	1	2	2	2	2	4	1
1514	1	1	0	2	2	0	2	2	0	0	2	2	2	1	0	0	0	20	0	0	0	2	2	2	2	4	0
1519	1	1	0	2	2	0	2	2	0	0	2	2	2	1	0	0	0	20	0	0	0	2	2	2	2	4	0
1528	0	1	0	2	0	1	2	2	1	1	1	2	2	1	0	0	1	20	0	0	1	2	2	2	2	4	1
1552	0	1	0	2	3	1	2	2	1	1	2	3	3	1	1	0	0	20	0	0	1	2	2	3	3	6	1
1553	1	1	0	2	4	1	2	2	1	1	1	2	1	1	0	1	0	20	0	0	1	2	2	2	1	3	1
1624	0	1	0	2	4	0	2	2	0	0	2	2	2	1	0	0	1	20	0	0	1	2	2	2	2	4	1
1660	1	1	0	2	2	0	2	2	0	0	2	2	2	1	0	0	0	20	0	0	0	2	2	2	2	4	0
1662	0	1	0	2	4	0	2	2	0	0	2	2	2	1	0	0	1	20	0	0	1	2	2	2	2	4	1
1664	1	1	0	2	2	0	2	2	0	0	2	2	2	1	0	0	0	20	0	0	0	2	2	2	2	4	0
1705	0	1	0	2	1	0	2	2	0	0	2	2	2	1	0	0	0	20	0	0	0	2	2	2	2	4	0
1716	1	1	0	2	2	0	2	2	0	0	2	2	2	1	0	0	0	20	0	0	0	2	2	2	2	4	0
1726	0	1	0	2	1	1	2	2	0	1	0	2	2	1	1	0	0	20	0	0	1	2	2	2	2	4	1
1727	0	1	0	2	3	0	2	2	0	0	2	3	3	1	1	0	0	20	0	0	1	2	2	3	3	6	1
1765	0	1	0	2	3	1	2	2	1	1	2	3	3	1	1	0	0	20	0	0	1	2	2	3	3	6	1
1767	0	1	0	2	3	1	2	2	1	1	2	3	3	1	1	0	0	20	0	0	1	2	2	3	3	6	1
1797	1	1	0	2	2	0	2	2	0	0	2	2	2	1	0	0	0	20	0	0	0	2	2	2	2	4	0
1802	1	1	0	2	2	1	2	2	0	0	2	3	3	1	1	0	0	20	0	0	1	2	2	3	3	6	1
1858	0	1	0	2	0	1	2	2	1	1	1	3	3	1	0	0	1	20	0	0	1	2	2	3	3	6	1
1886	0	1	0	2	0	1	2	2	1	1	1	3	3	1	0	0	1	20	0	0	1	2	2	3	3	6	1
1892	1	1	0	2	4	1	2	2	1	1	1	2	1	1	0	1	0	20	0	0	1	2	2	2	1	3	1
1899	1	1	0	2	2	0	2	2	0	0	2	2	2	1	0	0	0	20	0	0	0	2	2	2	2	4	0
1948	0	1	0	2	3	0	3	1	0	1	2	3	3	1	1	0	0	20	0	0	1	3	1	3	3	6	1
1954	0	1	0	2	3	0	3	1	0	1	2	3	3	1	1	0	0	20	0	0	1	3	1	3	3	6	1
1958	0	1	0	2	0	0	2	2	0	1	2	3	3	1	1	0	0	20	0	0	1	2	2	3	3	6	1
1962	0	1	0	2	0	1	2	2	1	1	1	3	3	1	0	0	1	20	0	0	1	2	2	3	3	6	1
2021	0	1	0	2	4	0	2	2	0	0	2	2	2	1	0	0	1	20	0	0	1	2	2	2	2	4	1
2065	1	1	0	2	4	1	2	2	1	1	1	2	2	1	0	1	0	20	0	0	1	2	2	2	2	4	1
2067	1	1	0	2	2	0	2	2	0	0	2	2	2	1	0	0	0	20	0	0	0	2	2	2	2	4	0
2074	1	1	0	2	2	0	2	2	0	0	2	2	2	1	0	0	0	20	0	0	0	2	2	2	2	4	0
2140	1	1	0	2	2	0	2	2	0	0	2	2	2	1	0	0	0	20	0	0	0	2	2	2	2	4	0
2153	0	1	0	2	0	0	2	2	1	0	1	3	3	1	0	0	1	20	0	0	1	2	2	3	3	6	1
2172	1	1	0	2	1	0	2	2	0	0	2	2	2	1	0	0	0	20	0	0	0	2	2	2	2	4	0
2178	1	1	0	2	4	1	2	2	1	1	1	2	1	1	0	1	0	20	0	0	1	2	2	2	1	3	1
2196	0	1	0	2	3	1	2	2	1	1	2	3	3	1	1	0	0	20	0	0	1	2	2	3	3	6	1
2214	0	1	0	2	3	1	2	2	1	1	2	3	3	1	1	0	0	20	0	0	1	2	2	3	3	6	1
2253	0	1	0	2	0	1	2	2	1	1	1	2	2	1	0	0	1	20	0	0	1	2	2	2	2	4	1
2290	1	1	0	2	1	0	2	2	0	0	2	2	2	1	0	0	0	20	0	0	0	2	2	2	2	4	0
2293	0	1	0	2	0	0	3	1	1	1	1	3	2	1	0	0	1	14	0	0	1	3	1	3	2	5	1
2309	1	1	0	2	2	0	2	2	0	0	2	2	2	1	0	0	0	20	0	0	0	2	2	2	2	4	0
2354	0	1	0	2	0	0	2	2	0	1	2	3	3	1	1	0	0	20	0	0	1	2	2	3	3	6	1
2364	0	1	0	2	1	0	2	2	0	0	2	2	2	1	0	0	0	20	0	0	0	2	2	2	2	4	0
2398	1	1	0	2	2	0	2	2	0	0	2	2	2	1	0	0	0	20	0	0	0	2	2	2	2	4	0
2423	1	1	0	2	2	1	2	2	1	1	1	2	2	1	0	0	1	20	0	0	1	2	2	2	2	4	1
2438	1	1	0	2	4	1	2	2	1	1	1	2	2	1	0	1	0	20	0	0	1	2	2	2	2	4	1
2443	0	1	0	2	1	0	2	1	0	0	2	2	3	1	1	0	0	20	0	0	1	2	1	2	3	5	1
2452	0	1	0	2	3	1	2	2	1	1	2	3	3	1	1	0	0	20	0	0	1	2	2	3	3	6	1
2461	0	1	0	2	0	1	2	2	1	1	1	3	3	1	0	0	1	20	0	0	1	2	2	3	3	6	1
2469	0	1	0	2	3	1	2	2	1	1	2	3	3	1	1	0	0	20	0	0	1	2	2	3	3	6	1
2484	0	1	0	2	4	0	2	2	0	0	2	2	2	1	0	0	1	20	0	0	1	2	2	2	2	4	1
2499	0	1	0	2	3	0	2	2	1	1	1	3	3	1	0	0	1	20	0	0	1	2	2	3	3	6	1
2531	1	1	0	2	2	1	2	2	1	1	1	2	2	1	0	0	1	20	0	0	1	2	2	2	2	4	1
2553	1	1	0	2	2	0	2	2	0	0	2	2	2	1	0	0	0	20	0	0	0	2	2	2	2	4	0
2560	0	1	0	2	0	1	2	2	1	1	1	3	3	1	0	0	1	20	0	0	1	2	2	3	3	6	1
2587	1	1	0	2	2	0	2	2	0	0	2	2	2	1	0	0	0	20	0	0	0	2	2	2	2	4	0
2594	1	1	0	2	2	0	2	2	0	0	2	2	2	1	0	0	0	20	0	0	0	2	2	2	2	4	0
2605	0	1	0	2	3	0	3	1	0	1	2	3	3	1	1	0	0	20	0	0	1	3	1	3	3	6	1
2635	1	1	0	2	2	0	2	2	0	0	2	2	2	1	0	0	0	20	0	0	0	2	2	2	2	4	0
2656	0	1	0	2	4	0	2	2	0	0	2	2	2	1	0	0	1	20	0	0	1	2	2	2	2	4	1
2668	1	1	0	2	1	1	2	2	0	1	0	2	2	1	1	0	0	20	0	0	1	2	2	2	2	4	1
2678	1	1	0	2	2	0	2	2	0	0	2	2	2	1	0	0	0	20	0	0	0	2	2	2	2	4	0
2694	1	1	0	2	2	0	2	2	0	0	2	2	2	1	0	0	0	20	0	0	0	2	2	2	2	4	0
2718	1	1	0	2	4	1	2	2	1	1	1	2	1	1	0	1	0	20	0	0	1	2	2	2	1	3	1
2756	0	1	0	2	1	1	2	2	0	1	0	2	2	1	1	0	0	20	0	0	1	2	2	2	2	4	1
2764	0	1	0	2	4	0	2	2	0	0	2	2	2	1	0	0	1	20	0	0	1	2	2	2	2	4	1
2795	1	1	0	2	2	0	2	2	0	0	2	2	2	1	0	0	0	20	0	0	0	2	2	2	2	4	0
2802	1	1	0	2	2	0	2	2	0	0	2	2	2	1	0	0	0	20	0	0	0	2	2	2	2	4	0
2845	0	1	0	2	4	1	2	2	1	1	1	2	1	1	0	1	0	20	0	0	1	2	2	2	1	3	1
2933	1	1	0	2	2	0	2	2	0	0	2	2	2	1	0	0	0	20	0	0	0	2	2	2	2	4	0
2937	0	1	0	2	4	0	2	2	0	0	2	2	2	1	0	0	1	20	0	0	1	2	2	2	2	4	1
2947	1	1	0	2	1	1	2	2	0	1	0	2	2	1	1	0	0	20	0	0	1	2	2	2	2	4	1
2953	0	1	0	2	1	0	2	1	0	0	2	2	3	1	1	0	0	20	0	0	1	2	1	2	3	5	1
2958	0	1	0	2	1	1	2	2	0	1	0	2	2	1	1	0	0	20	0	0	1	2	2	2	2	4	1
2972	0	1	0	2	3	1	3	2	0	1	2	3	3	1	1	0	0	20	0	0	1	3	2	3	3	6	1
3020	1	1	0	2	1	1	2	2	0	1	0	2	2	1	1	0	0	20	0	0	1	2	2	2	2	4	1
3031	1	1	0	2	4	1	2	2	1	1	1	2	1	1	0	1	0	20	0	0	1	2	2	2	1	3	1
3041	0	1	0	2	0	1	2	2	1	1	1	3	3	1	0	0	1	20	0	0	1	2	2	3	3	6	1
3057	0	1	0	2	0	1	2	2	1	1	1	2	2	1	0	0	1	20	0	0	1	2	2	2	2	4	1
3060	0	1	0	2	3	1	2	2	1	1	2	3	3	1	1	0	0	20	0	0	1	2	2	3	3	6	1
3078	1	1	0	2	4	1	2	2	1	1	1	2	1	1	0	1	0	20	0	0	1	2	2	2	1	3	1
3093	0	1	0	2	0	1	2	2	1	1	1	3	3	1	0	0	1	20	0	0	1	2	2	3	3	6	1
3132	1	1	0	2	4	1	2	2	1	1	1	2	1	1	0	1	0	20	0	0	1	2	2	2	1	3	1
3138	1	1	0	2	2	0	2	2	0	0	2	2	2	1	0	0	0	20	0	0	0	2	2	2	2	4	0
3181	0	1	0	2	1	1	2	2	0	1	0	2	2	1	1	0	0	20	0	0	1	2	2	2	2	4	1
3189	1	1	0	2	1	0	2	2	0	0	2	2	2	1	0	0	0	20	0	0	0	2	2	2	2	4	0
3194	1	1	0	2	4	1	2	2	1	1	1	2	1	1	0	1	0	20	0	0	1	2	2	2	1	3	1
3208	1	1	0	2	4	1	2	2	1	1	1	2	2	1	0	1	0	20	0	0	1	2	2	2	2	4	1
3281	0	1	0	2	4	0	2	2	0	0	2	2	2	1	0	0	1	20	0	0	1	2	2	2	2	4	1
3297	1	1	0	2	2	0	2	2	0	0	2	2	2	1	0	0	0	20	0	0	0	2	2	2	2	4	0
3312	0	1	0	2	0	1	2	2	1	1	1	2	2	1	0	0	1	20	0	0	1	2	2	2	2	4	1
3331	0	1	0	2	0	1	2	2	1	1	1	3	3	1	0	0	1	20	0	0	1	2	2	3	3	6	1
3366	1	1	0	2	2	0	2	2	0	0	2	2	2	1	0	0	0	20	0	0	0	2	2	2	2	4	0
3367	1	1	0	2	1	0	2	2	0	0	2	2	2	1	0	0	0	20	0	0	0	2	2	2	2	4	0
3379	0	1	0	2	3	0	3	1	0	1	2	3	3	1	1	0	0	20	0	0	1	3	1	3	3	6	1
3396	1	1	0	2	2	0	2	2	0	0	2	2	2	1	0	0	0	20	0	0	0	2	2	2	2	4	0
3399	0	1	0	2	4	0	2	2	0	0	2	2	2	1	0	0	1	20	0	0	1	2	2	2	2	4	1
3423	1	1	0	2	2	1	2	2	1	1	1	2	2	1	0	0	1	20	0	0	1	2	2	2	2	4	1
3438	1	1	0	2	2	0	2	2	0	0	2	2	2	1	0	0	0	20	0	0	0	2	2	2	2	4	0
3482	0	1	0	2	0	1	2	2	1	1	1	3	3	1	0	0	1	20	0	0	1	2	2	3	3	6	1
3492	0	1	0	2	1	0	2	1	0	0	2	2	3	1	1	0	0	20	0	0	1	2	1	2	3	5	1
3498	0	1	0	2	0	1	2	2	1	1	1	2	2	1	0	0	1	20	0	0	1	2	2	2	2	4	1
3504	0	1	0	2	0	0	3	1	1	1	1	3	2	1	0	0	1	20	0	0	1	3	1	3	2	5	1
3515	1	1	0	2	2	0	2	2	0	0	2	2	2	1	0	0	0	20	0	0	0	2	2	2	2	4	0
3520	1	1	0	2	1	1	2	2	0	1	0	2	2	1	1	0	0	20	0	0	1	2	2	2	2	4	1
3523	1	1	0	2	2	0	2	2	0	0	2	2	2	1	0	0	0	20	0	0	0	2	2	2	2	4	0
3529	1	1	0	2	1	1	2	2	0	1	0	2	2	1	1	0	0	20	0	0	1	2	2	2	2	4	1
3532	0	1	0	2	0	0	2	2	0	1	2	3	3	1	1	0	0	20	0	0	1	2	2	3	3	6	1
3546	0	1	0	2	1	1	2	2	0	1	0	2	2	1	1	0	0	20	0	0	1	2	2	2	2	4	1
3550	0	1	0	2	0	0	3	1	1	1	1	3	2	1	0	0	1	14	1	0	1	3	1	3	2	5	2
3554	1	1	0	2	2	1	2	2	0	0	2	2	2	1	1	0	0	20	0	0	1	2	2	2	2	4	1
3615	1	1	0	2	4	1	2	2	1	1	1	2	2	1	0	1	0	20	0	0	1	2	2	2	2	4	1
3625	0	1	0	2	0	0	2	2	0	1	2	2	2	1	1	0	0	20	0	0	1	2	2	2	2	4	1
3643	0	1	0	2	4	0	2	2	0	0	2	2	2	1	0	0	1	20	0	0	1	2	2	2	2	4	1
3703	0	1	0	2	0	1	2	2	1	1	1	3	3	1	0	0	1	20	0	0	1	2	2	3	3	6	1
3708	1	1	0	2	2	0	2	2	0	0	2	2	2	1	0	0	0	20	0	0	0	2	2	2	2	4	0
3742	1	1	0	2	2	1	2	2	0	0	2	3	3	1	1	0	0	20	0	0	1	2	2	3	3	6	1
3750	0	1	0	2	3	0	3	1	0	1	2	3	3	1	1	0	0	20	0	0	1	3	1	3	3	6	1
3765	0	1	0	2	0	0	3	3	1	1	2	4	2	1	1	0	0	20	0	0	1	3	3	3	2	5	1
3769	0	1	0	2	0	1	2	2	1	1	1	2	2	1	0	0	1	20	0	0	1	2	2	2	2	4	1
3797	0	1	0	2	3	1	2	2	1	1	2	3	3	1	1	0	0	20	0	0	1	2	2	3	3	6	1
3831	0	1	0	2	3	0	3	1	0	1	2	3	3	1	1	0	0	20	0	0	1	3	1	3	3	6	1
3835	1	1	0	2	2	0	2	2	0	0	2	2	2	1	0	0	0	20	0	0	0	2	2	2	2	4	0
3844	0	1	0	2	1	0	2	1	0	0	2	2	3	1	1	0	0	20	0	0	1	2	1	2	3	5	1
3875	1	1	0	2	2	0	2	2	0	0	2	2	2	1	0	0	0	20	0	0	0	2	2	2	2	4	0
3880	0	1	0	2	4	0	2	2	0	0	2	2	2	1	0	0	1	20	0	0	1	2	2	2	2	4	1
3882	1	1	0	2	2	0	2	2	0	0	2	2	2	1	0	0	0	20	0	0	0	2	2	2	2	4	0
3885	1	1	0	2	2	0	2	2	0	0	2	2	2	1	0	0	0	20	0	0	0	2	2	2	2	4	0
3893	1	1	0	2	2	0	2	2	0	0	2	2	2	1	0	0	0	20	0	0	0	2	2	2	2	4	0
3894	1	1	0	2	2	0	2	2	0	0	2	2	2	1	0	0	0	20	0	0	0	2	2	2	2	4	0
3909	0	1	0	2	2	1	2	2	0	0	2	3	3	1	1	0	0	20	0	0	1	2	2	3	3	6	1
3925	1	1	0	2	4	1	2	2	1	1	1	2	1	1	0	1	0	20	0	0	1	2	2	2	1	3	1
3933	0	1	0	2	0	1	2	2	1	1	1	2	2	1	0	0	1	20	0	0	1	2	2	2	2	4	1
3952	1	1	0	2	2	0	2	2	0	0	2	2	2	1	0	0	0	20	0	0	0	2	2	2	2	4	0
3969	0	1	0	2	0	1	2	2	1	1	1	3	3	1	0	0	1	20	0	0	1	2	2	3	3	6	1
3970	1	1	0	2	4	1	2	2	1	1	1	2	1	1	0	1	0	20	0	0	1	2	2	2	1	3	1
4012	0	1	0	2	1	0	3	1	0	0	2	3	3	1	1	0	0	20	0	0	1	3	1	3	3	6	1
4032	1	1	0	2	2	1	2	2	0	0	2	3	3	1	1	0	0	20	0	0	1	2	2	3	3	6	1
4037	0	1	0	2	4	0	2	2	0	0	2	2	2	1	0	0	1	20	0	0	1	2	2	2	2	4	1
4038	0	1	0	2	4	1	2	2	1	1	1	2	1	1	0	1	0	20	0	0	1	2	2	2	1	3	1
4045	1	1	0	2	4	1	2	2	1	1	1	2	1	1	0	1	0	20	0	0	1	2	2	2	1	3	1
4078	1	1	0	2	2	1	2	2	0	0	2	2	2	1	1	0	0	20	0	0	1	2	2	2	2	4	1
4085	0	1	0	2	4	0	2	2	0	0	2	2	2	1	0	0	1	20	0	0	1	2	2	2	2	4	1
4088	0	1	0	2	0	1	2	2	1	1	1	2	2	1	0	0	1	20	0	0	1	2	2	2	2	4	1
4094	1	1	0	2	2	0	2	2	0	0	2	2	2	1	0	0	0	20	0	0	0	2	2	2	2	4	0
4102	1	1	0	2	1	0	2	2	0	0	2	2	2	1	0	0	0	20	0	0	0	2	2	2	2	4	0
4115	0	1	0	2	0	1	2	2	1	1	1	3	3	1	0	0	1	20	0	0	1	2	2	3	3	6	1
4119	0	1	0	2	4	0	2	2	0	0	2	2	2	1	0	0	1	20	0	0	1	2	2	2	2	4	1
4121	0	1	0	2	3	1	3	3	0	1	2	3	3	1	1	0	0	20	0	0	1	3	3	3	3	6	1
4129	1	1	0	2	1	0	2	2	0	0	2	2	2	1	0	0	0	20	0	0	0	2	2	2	2	4	0
4168	0	1	0	2	3	1	2	2	1	1	2	3	3	1	1	0	0	20	0	0	1	2	2	3	3	6	1
4173	0	1	0	2	0	1	2	2	1	1	1	3	3	1	0	0	1	20	0	0	1	2	2	3	3	6	1
4187	0	1	0	2	3	0	2	2	0	0	2	3	3	1	1	0	0	20	0	0	1	2	2	3	3	6	1
4229	0	1	0	2	0	0	3	3	1	1	2	4	2	1	1	0	0	20	0	0	1	3	3	3	2	5	1
4286	1	1	0	2	2	1	2	2	0	0	2	2	2	1	1	0	0	20	0	0	1	2	2	2	2	4	1
4287	1	1	0	2	2	1	2	2	0	0	2	2	2	1	1	0	0	20	0	0	1	2	2	2	2	4	1
4288	1	1	0	2	2	0	2	2	0	0	2	2	2	1	0	0	0	20	0	0	0	2	2	2	2	4	0
4320	1	1	0	2	2	0	2	2	0	0	2	2	2	1	0	0	0	20	0	0	0	2	2	2	2	4	0
4328	0	1	0	2	0	0	3	1	1	1	1	3	2	1	0	0	1	14	2	0	1	3	1	3	2	5	3
4343	0	1	0	2	4	0	2	2	0	0	2	2	2	1	0	0	1	20	0	0	1	2	2	2	2	4	1
4346	0	1	0	2	3	1	2	2	0	0	2	3	3	1	1	0	0	20	0	0	1	2	2	3	3	6	1
4348	0	1	0	2	3	1	2	2	0	0	2	3	3	1	1	0	0	20	0	0	1	2	2	3	3	6	1
4350	1	1	0	2	4	1	2	2	1	1	1	2	1	1	0	1	0	20	0	0	1	2	2	2	1	3	1
4351	0	1	0	2	3	1	2	2	0	0	2	3	3	1	1	0	0	20	0	0	1	2	2	3	3	6	1
4356	0	1	0	2	0	0	2	2	0	1	2	3	3	1	1	0	0	20	0	0	1	2	2	3	3	6	1
4367	1	1	0	2	1	1	2	2	0	1	0	2	2	1	1	0	0	20	0	0	1	2	2	2	2	4	1
4373	0	1	0	2	0	1	2	2	1	1	1	3	3	1	0	0	1	20	0	0	1	2	2	3	3	6	1
4393	1	1	0	2	2	1	2	2	0	0	2	2	2	1	1	0	0	20	0	0	1	2	2	2	2	4	1
4406	1	1	0	2	4	1	2	2	1	1	1	2	1	1	0	1	0	20	0	0	1	2	2	2	1	3	1
4423	0	1	0	2	4	0	2	2	0	0	2	2	2	1	0	0	1	20	0	0	1	2	2	2	2	4	1
4427	0	1	0	2	0	1	2	2	1	1	1	3	3	1	0	0	1	20	0	0	1	2	2	3	3	6	1
4444	0	1	0	2	3	1	2	2	1	1	2	3	3	1	1	0	0	20	0	0	1	2	2	3	3	6	1
4446	0	1	0	2	0	0	2	2	0	1	2	3	3	1	1	0	0	20	0	0	1	2	2	3	3	6	1
4447	1	1	0	2	2	0	2	2	0	0	2	2	2	1	0	0	0	20	0	0	0	2	2	2	2	4	0
4472	0	1	0	2	4	1	2	2	1	1	1	2	1	1	0	1	0	20	0	0	1	2	2	2	1	3	1
4483	1	1	0	2	2	0	2	2	0	0	2	2	2	1	0	0	0	20	0	0	0	2	2	2	2	4	0
4489	0	1	0	2	0	0	3	2	1	0	1	3	2	1	0	0	1	20	0	0	1	3	2	3	2	5	1
4495	0	1	0	2	4	0	2	2	0	0	2	2	2	1	0	0	1	20	0	0	1	2	2	2	2	4	1
4496	1	1	0	2	2	0	2	2	0	0	2	2	2	1	0	0	0	20	0	0	0	2	2	2	2	4	0
4502	1	1	0	2	2	0	2	2	0	0	2	2	2	1	0	0	0	20	0	0	0	2	2	2	2	4	0
4506	1	1	0	2	2	0	2	2	0	0	2	2	2	1	0	0	0	20	0	0	0	2	2	2	2	4	0
4541	0	1	0	2	0	1	2	2	1	1	1	2	2	1	0	0	1	20	0	0	1	2	2	2	2	4	1
4546	0	1	0	2	3	1	2	2	1	1	2	3	3	1	1	0	0	20	0	0	1	2	2	3	3	6	1
4559	1	1	0	2	2	1	2	2	0	0	2	2	2	1	1	0	0	20	0	0	1	2	2	2	2	4	1
4571	1	1	0	2	2	0	2	2	0	0	2	2	2	1	0	0	0	20	0	0	0	2	2	2	2	4	0
4576	0	1	0	2	4	0	2	1	1	1	1	2	2	1	0	1	0	20	0	0	1	2	1	2	2	4	1
4585	0	1	0	2	4	0	2	2	0	0	2	2	2	1	0	0	1	20	0	0	1	2	2	2	2	4	1
4604	1	1	0	2	4	1	2	2	1	1	1	2	1	1	0	1	0	20	0	0	1	2	2	2	1	3	1
4623	0	1	0	2	0	0	3	3	1	1	2	4	2	1	1	0	0	20	0	0	1	3	3	3	2	5	1
4633	0	1	0	2	4	0	2	2	0	0	2	2	2	1	0	0	1	20	0	0	1	2	2	2	2	4	1
4649	0	1	0	2	1	1	2	2	0	1	0	2	2	1	1	0	0	20	0	0	1	2	2	2	2	4	1
4651	1	1	0	2	4	1	2	2	1	1	1	2	2	1	0	1	0	20	0	0	1	2	2	2	2	4	1
4655	1	1	0	2	2	1	2	2	0	0	2	2	2	1	1	0	0	20	0	0	1	2	2	2	2	4	1
4660	0	1	0	2	0	1	2	2	1	1	1	3	3	1	0	0	1	20	0	0	1	2	2	3	3	6	1
4661	1	1	0	2	2	1	2	2	0	0	2	3	3	1	1	0	0	20	0	0	1	2	2	3	3	6	1
4678	1	1	0	2	1	1	2	2	0	1	0	2	2	1	1	0	0	20	0	0	1	2	2	2	2	4	1
4684	1	1	0	2	4	1	2	2	1	1	1	2	1	1	0	1	0	20	0	0	1	2	2	2	1	3	1
4696	0	1	0	2	0	1	2	2	1	1	1	3	3	1	0	0	1	20	0	0	1	2	2	3	3	6	1
4698	0	1	0	2	3	1	2	2	0	0	2	3	3	1	1	0	0	20	0	0	1	2	2	3	3	6	1
4706	1	1	0	2	2	0	2	2	0	0	2	2	2	1	0	0	0	20	0	0	0	2	2	2	2	4	0
4707	0	1	0	2	0	1	2	2	1	1	1	3	3	1	0	0	1	20	0	0	1	2	2	3	3	6	1
4713	0	1	0	2	3	1	2	2	1	1	2	3	3	1	1	0	0	20	0	0	1	2	2	3	3	6	1
4724	1	1	0	2	2	1	2	2	0	0	2	2	2	1	1	0	0	20	0	0	1	2	2	2	2	4	1
4725	1	1	0	2	2	0	2	2	0	0	2	2	2	1	0	0	0	20	0	0	0	2	2	2	2	4	0
4737	0	1	0	2	4	0	2	2	0	0	2	2	2	1	0	0	1	20	0	0	1	2	2	2	2	4	1
4751	1	1	0	2	4	1	2	2	1	1	1	2	1	1	0	1	0	20	0	0	1	2	2	2	1	3	1
4759	1	1	0	2	2	0	2	2	0	0	2	2	2	1	0	0	0	20	0	0	0	2	2	2	2	4	0
4789	1	1	0	2	2	1	2	2	0	0	2	3	3	1	1	0	0	20	0	0	1	2	2	3	3	6	1
4793	1	1	0	2	2	1	2	2	0	0	2	3	3	1	1	0	0	20	0	0	1	2	2	3	3	6	1
4811	1	1	0	2	2	0	2	2	0	0	2	2	2	1	0	0	0	20	0	0	0	2	2	2	2	4	0
4902	0	1	0	2	0	0	3	2	0	1	2	3	2	1	1	0	0	20	0	0	1	3	2	3	2	5	1
4931	0	1	0	2	0	0	2	2	0	1	2	3	3	1	1	0	0	20	0	0	1	2	2	3	3	6	1
4958	1	1	0	2	2	0	2	2	0	0	2	2	2	1	0	0	0	20	0	0	0	2	2	2	2	4	0
4973	1	1	0	2	2	0	2	2	0	0	2	2	2	1	0	0	0	20	0	0	0	2	2	2	2	4	0
5004	1	1	0	2	1	1	2	2	0	1	0	2	2	1	1	0	0	20	0	0	1	2	2	2	2	4	1
5011	1	1	0	2	2	0	2	2	0	0	2	2	2	1	0	0	0	20	0	0	0	2	2	2	2	4	0
5080	0	1	0	2	4	0	2	2	0	0	2	2	2	1	0	0	1	20	0	0	1	2	2	2	2	4	1
5084	1	1	0	2	2	0	2	2	0	0	2	2	2	1	0	0	0	20	0	0	0	2	2	2	2	4	0
5097	1	1	0	2	1	1	2	2	0	1	0	2	2	1	1	0	0	20	0	0	1	2	2	2	2	4	1
5104	0	1	0	2	3	1	2	2	1	1	2	3	3	1	1	0	0	20	0	0	1	2	2	3	3	6	1
5111	0	1	0	2	3	1	2	2	1	1	2	3	3	1	1	0	0	20	0	0	1	2	2	3	3	6	1
5126	0	1	0	2	3	1	2	2	1	1	2	3	3	1	1	0	0	20	0	0	1	2	2	3	3	6	1
5137	0	1	0	2	3	1	2	2	0	0	2	3	3	1	1	0	0	20	0	0	1	2	2	3	3	6	1
5156	1	1	0	2	4	1	2	2	1	1	1	2	1	1	0	1	0	20	0	0	1	2	2	2	1	3	1
5158	1	1	0	2	2	0	2	2	0	0	2	2	2	1	0	0	0	20	0	0	0	2	2	2	2	4	0
5224	1	1	0	2	1	0	2	2	0	0	2	2	2	1	0	0	0	20	0	0	0	2	2	2	2	4	0
5228	1	1	0	2	1	1	2	2	0	1	0	2	2	1	1	0	0	20	0	0	1	2	2	2	2	4	1
5237	1	1	0	2	2	1	2	2	1	1	1	2	2	1	0	0	1	20	0	0	1	2	2	2	2	4	1
5306	1	1	0	2	1	0	2	2	0	0	2	2	2	1	0	0	0	20	0	0	0	2	2	2	2	4	0
5312	1	1	0	2	2	0	2	2	0	0	2	2	2	1	0	0	0	20	0	0	0	2	2	2	2	4	0
5315	0	1	0	2	0	1	2	2	1	1	1	2	2	1	0	0	1	20	0	0	1	2	2	2	2	4	1
5330	0	1	0	2	0	1	2	2	1	1	1	2	2	1	0	0	1	20	0	0	1	2	2	2	2	4	1
5375	1	1	0	2	1	1	2	2	0	1	0	2	2	1	1	0	0	20	0	0	1	2	2	2	2	4	1
5392	0	1	0	2	3	0	2	2	0	0	2	3	3	1	1	0	0	20	0	0	1	2	2	3	3	6	1
5400	1	1	0	2	2	1	2	2	1	1	1	2	2	1	0	0	1	20	0	0	1	2	2	2	2	4	1
5415	0	1	0	2	4	0	2	2	0	0	2	2	2	1	0	0	1	20	0	0	1	2	2	2	2	4	1
5424	1	1	0	2	2	0	2	2	0	0	2	2	2	1	0	0	0	20	0	0	0	2	2	2	2	4	0
5432	0	1	0	2	3	0	3	1	0	1	2	3	3	1	1	0	0	20	0	0	1	3	1	3	3	6	1
5444	1	1	0	2	2	0	2	2	0	0	2	2	2	1	0	0	0	20	0	0	0	2	2	2	2	4	0
5460	1	1	0	2	2	0	2	2	0	0	2	2	2	1	0	0	0	20	0	0	0	2	2	2	2	4	0
5480	0	1	0	2	4	0	2	2	0	0	2	2	2	1	0	0	1	20	0	0	1	2	2	2	2	4	1
5481	0	1	0	2	3	1	2	2	1	1	2	3	3	1	1	0	0	20	0	0	1	2	2	3	3	6	1
5503	1	1	0	2	2	0	2	2	0	0	2	2	2	1	0	0	0	20	0	0	0	2	2	2	2	4	0
5532	1	1	0	2	1	1	2	2	0	1	0	2	2	1	1	0	0	20	0	0	1	2	2	2	2	4	1
5533	1	1	0	2	2	1	2	2	0	0	2	3	3	1	1	0	0	20	0	0	1	2	2	3	3	6	1
5575	1	1	0	2	1	1	2	2	0	1	0	2	2	1	1	0	0	20	0	0	1	2	2	2	2	4	1
5595	0	1	0	2	0	1	2	2	1	1	1	3	3	1	0	0	1	20	0	0	1	2	2	3	3	6	1
5662	1	1	0	2	2	1	2	2	0	0	2	2	2	1	1	0	0	20	0	0	1	2	2	2	2	4	1
5678	1	1	0	2	2	1	2	2	0	0	2	2	2	1	1	0	0	20	0	0	1	2	2	2	2	4	1
5681	0	1	0	2	0	1	2	2	1	1	1	3	3	1	0	0	1	20	0	0	1	2	2	3	3	6	1
5723	0	1	0	2	0	1	2	2	1	1	1	3	3	1	0	0	1	20	0	0	1	2	2	3	3	6	1
5744	1	1	0	2	2	1	2	2	0	0	2	3	3	1	1	0	0	20	0	0	1	2	2	3	3	6	1
5753	0	1	0	2	0	0	3	1	1	1	1	3	2	1	0	0	1	20	0	0	1	3	1	3	2	5	1
5765	1	1	0	2	2	0	2	2	0	0	2	2	2	1	0	0	0	20	0	0	0	2	2	2	2	4	0
5768	0	1	0	2	1	1	2	2	0	1	0	2	2	1	1	0	0	20	0	0	1	2	2	2	2	4	1
5769	1	1	0	2	4	1	2	2	1	1	1	2	1	1	0	1	0	20	0	0	1	2	2	2	1	3	1
5775	0	1	0	2	3	1	2	2	1	1	2	3	3	1	1	0	0	20	0	0	1	2	2	3	3	6	1
5777	1	1	0	2	2	0	2	2	0	0	2	2	2	1	0	0	0	20	0	0	0	2	2	2	2	4	0
5788	1	1	0	2	2	0	2	2	0	0	2	2	2	1	0	0	0	20	0	0	0	2	2	2	2	4	0
5805	1	1	0	2	2	0	2	2	0	0	2	2	2	1	0	0	0	20	0	0	0	2	2	2	2	4	0
5817	1	1	0	2	2	0	2	2	0	0	2	2	2	1	0	0	0	20	0	0	0	2	2	2	2	4	0
5855	1	1	0	2	4	1	2	2	1	1	1	2	1	1	0	1	0	20	0	0	1	2	2	2	1	3	1
5858	1	1	0	2	2	1	2	2	0	0	2	3	3	1	1	0	0	20	0	0	1	2	2	3	3	6	1
5882	0	1	0	2	0	1	2	2	1	1	1	2	2	1	0	0	1	20	0	0	1	2	2	2	2	4	1
5922	1	1	0	2	2	0	2	2	0	0	2	2	2	1	0	0	0	20	0	0	0	2	2	2	2	4	0
5924	1	1	0	2	2	0	2	2	0	0	2	2	2	1	0	0	0	20	0	0	0	2	2	2	2	4	0
5949	1	1	0	2	4	1	2	2	1	1	1	2	1	1	0	1	0	20	0	0	1	2	2	2	1	3	1
5962	1	1	0	2	2	1	2	2	0	0	2	3	3	1	1	0	0	20	0	0	1	2	2	3	3	6	1
5966	0	1	0	2	0	1	2	2	1	1	1	3	3	1	0	0	1	20	0	0	1	2	2	3	3	6	1
6422	1	1	0	2	2	1	2	2	1	1	1	2	2	2	0	0	1	20	0	0	1	2	2	2	2	4	1
6707	0	1	0	2	1	0	2	1	0	0	2	2	3	3	1	0	0	20	0	0	1	2	1	2	3	5	1
6715	0	1	0	2	1	0	2	1	0	0	2	2	3	3	1	0	0	20	0	0	1	2	1	2	3	5	1
6722	0	1	0	2	1	0	2	1	0	0	2	2	3	3	1	0	0	20	0	0	1	2	1	2	3	5	1
6724	0	1	0	2	1	0	2	1	0	0	2	2	3	3	1	0	0	20	0	0	1	2	1	2	3	5	1
6732	0	1	0	2	0	0	3	1	1	1	1	3	2	3	0	0	1	14	2	0	1	3	1	3	2	5	3
6733	0	1	0	2	1	0	2	1	0	0	2	2	3	3	1	0	0	20	0	0	1	2	1	2	3	5	1
1	1	2	0	2	4	1	2	1	1	1	1	2	2	1	0	1	0	20	0	0	1	2	1	2	2	4	1
4	1	2	0	2	4	1	2	1	1	1	1	2	2	1	0	1	0	20	0	0	1	2	1	2	2	4	1
22	0	2	0	2	4	0	2	1	1	1	2	2	2	1	0	1	0	20	0	0	1	2	1	2	2	4	1
24	0	2	0	2	4	1	2	1	1	1	2	2	2	1	0	1	0	20	0	0	1	2	1	2	2	4	1
25	0	2	0	2	4	1	2	1	1	1	2	2	2	1	0	1	0	20	0	0	1	2	1	2	2	4	1
26	1	2	0	2	4	1	2	1	1	1	1	2	2	1	0	1	0	20	0	0	1	2	1	2	2	4	1
44	0	2	0	2	0	1	3	2	1	1	1	3	3	1	0	0	1	20	0	1	1	3	2	3	3	6	1
83	0	2	0	2	3	0	3	2	0	1	2	3	2	1	0	0	1	20	0	1	1	3	2	3	2	5	1
89	0	2	0	2	3	1	3	2	1	1	1	3	3	1	0	0	1	20	0	1	1	3	2	3	3	6	1
104	1	2	0	2	1	1	1	2	1	1	1	2	2	1	0	0	1	20	0	1	1	1	2	2	2	4	1
165	0	2	0	2	0	0	2	1	0	0	2	2	2	1	1	0	0	20	0	1	1	2	1	2	2	4	1
166	0	2	0	2	3	0	3	1	1	1	1	3	3	1	0	0	1	20	0	1	1	3	1	3	3	6	1
170	0	2	0	2	0	1	2	1	0	1	0	2	2	1	1	0	0	20	0	1	1	2	1	2	2	4	1
239	0	2	0	2	3	0	3	2	0	1	2	3	2	1	0	0	1	20	0	1	1	3	2	3	2	5	1
248	1	2	0	2	2	1	3	2	1	1	1	2	2	1	0	0	1	20	0	1	1	3	2	2	2	4	1
277	0	2	0	2	0	1	3	2	1	1	1	3	2	1	0	0	1	20	0	1	1	3	2	3	2	5	1
302	0	2	0	2	0	1	3	2	1	1	1	3	2	1	0	0	1	20	0	1	1	3	2	3	2	5	1
341	0	2	0	2	3	1	3	2	0	0	2	2	2	1	1	0	0	20	0	1	1	3	2	2	2	4	1
347	0	2	0	2	3	0	2	1	1	1	2	2	2	1	0	1	0	20	0	1	1	2	1	2	2	4	1
405	1	2	0	2	2	0	4	2	1	1	2	3	2	1	0	0	1	20	0	1	1	3	2	3	2	5	1
420	0	2	0	2	0	0	3	2	1	1	2	3	2	1	0	0	1	20	0	1	1	3	2	3	2	5	1
459	0	2	0	2	0	1	3	2	0	0	2	2	2	1	1	0	0	20	0	1	1	3	2	2	2	4	1
468	1	2	0	2	2	1	3	2	1	1	1	2	2	1	0	0	1	20	0	1	1	3	2	2	2	4	1
520	1	2	0	2	2	0	4	2	1	1	2	3	2	1	0	0	1	20	0	1	1	3	2	3	2	5	1
524	0	2	0	2	0	1	3	2	1	1	1	3	2	1	0	0	1	20	0	1	1	3	2	3	2	5	1
633	0	2	0	2	1	1	3	3	0	1	1	3	2	1	0	0	1	20	0	1	1	3	3	3	2	5	1
702	0	2	0	2	3	0	3	2	1	1	1	2	2	1	0	1	0	20	0	1	1	3	2	2	2	4	1
711	0	2	0	2	1	1	3	2	1	1	1	2	2	1	0	0	1	20	0	1	1	3	2	2	2	4	1
742	0	2	0	2	3	1	3	2	1	1	1	3	3	1	0	0	1	20	0	1	1	3	2	3	3	6	1
753	0	2	0	2	1	1	3	3	0	1	1	3	2	1	0	0	1	20	0	1	1	3	3	3	2	5	1
804	0	2	0	2	4	0	3	2	0	1	2	3	2	1	0	0	1	20	0	1	1	3	2	3	2	5	1
833	0	2	0	2	0	1	3	2	1	1	1	3	2	1	0	0	1	20	0	1	1	3	2	3	2	5	1
849	1	2	0	2	2	0	3	2	0	0	2	2	2	1	1	0	0	20	0	1	1	3	2	2	2	4	1
859	0	2	0	2	3	0	3	2	1	0	1	2	2	1	0	1	0	20	0	1	1	3	2	2	2	4	1
889	1	2	0	2	0	1	3	2	0	0	2	2	2	1	1	0	0	20	0	1	1	3	2	2	2	4	1
938	0	2	0	2	3	0	2	1	1	1	1	2	3	1	0	0	1	20	0	1	1	2	1	2	3	5	1
961	0	2	0	2	0	0	3	2	0	1	2	2	2	1	1	0	0	20	0	1	1	3	2	2	2	4	1
991	0	2	0	2	0	0	4	2	1	1	2	3	2	1	0	0	1	20	0	1	1	3	2	3	2	5	1
1015	0	2	0	2	0	1	3	2	1	1	1	2	2	1	0	0	1	20	0	1	1	3	2	2	2	4	1
1018	1	2	0	2	2	1	3	2	0	0	2	2	2	1	1	0	0	20	0	1	1	3	2	2	2	4	1
1027	0	2	0	2	3	0	1	2	0	1	2	2	2	1	0	0	1	20	0	1	1	1	2	2	2	4	1
1032	0	2	0	2	3	0	2	2	0	1	2	2	2	1	0	0	1	20	0	1	1	2	2	2	2	4	1
1036	1	2	0	2	1	1	1	2	1	1	1	2	2	1	0	0	1	20	0	1	1	1	2	2	2	4	1
1068	0	2	0	2	0	1	3	2	1	1	1	2	2	1	0	0	1	20	0	1	1	3	2	2	2	4	1
1127	0	2	0	2	3	0	3	3	0	1	2	3	2	1	0	0	1	20	0	1	1	3	3	3	2	5	1
1135	0	2	0	2	0	1	3	2	0	0	2	2	2	1	1	0	0	20	0	1	1	3	2	2	2	4	1
1137	0	2	0	2	3	0	3	1	1	1	1	3	3	1	0	0	1	20	0	1	1	3	1	3	3	6	1
1158	0	2	0	2	0	1	3	2	1	1	1	2	2	1	0	0	1	20	0	1	1	3	2	2	2	4	1
1208	0	2	0	2	0	0	3	2	0	1	2	2	2	1	1	0	0	20	0	1	1	3	2	2	2	4	1
1233	0	2	0	2	3	0	3	2	1	1	1	2	2	1	0	1	0	20	0	1	1	3	2	2	2	4	1
1480	1	2	0	2	0	1	3	2	0	0	2	2	2	1	1	0	0	20	0	0	1	3	2	2	2	4	1
1486	1	2	0	2	1	1	1	2	1	1	1	2	2	1	0	0	1	20	0	0	1	1	2	2	2	4	1
1513	1	2	0	2	0	1	3	2	0	0	2	2	2	1	1	0	0	20	0	0	1	3	2	2	2	4	1
1551	0	2	0	2	0	1	3	2	1	1	1	3	3	1	0	0	1	20	0	0	1	3	2	3	3	6	1
1555	0	2	0	2	1	1	3	3	0	1	1	3	2	1	0	0	1	20	0	0	1	3	3	3	2	5	1
1588	0	2	0	2	1	1	3	2	0	1	1	3	2	1	0	0	1	20	0	0	1	3	2	3	2	5	1
1611	0	2	0	2	0	1	3	2	0	0	2	2	2	1	1	0	0	20	0	0	1	3	2	2	2	4	1
1625	0	2	0	2	0	1	4	2	1	1	1	3	2	1	0	0	1	20	0	0	1	3	2	3	2	5	1
1681	1	2	0	2	1	1	1	2	1	1	1	2	2	1	0	0	1	20	0	0	1	1	2	2	2	4	1
1692	0	2	0	2	1	1	3	2	0	1	1	3	2	1	0	0	1	20	0	0	1	3	2	3	2	5	1
1706	0	2	0	2	0	1	3	2	0	0	2	2	2	1	1	0	0	20	0	0	1	3	2	2	2	4	1
1750	0	2	0	2	3	0	2	2	0	1	2	2	2	1	0	0	1	20	0	0	1	2	2	2	2	4	1
1774	0	2	0	2	1	1	3	2	1	1	1	2	2	1	0	0	1	20	0	0	1	3	2	2	2	4	1
1853	0	2	0	2	0	1	3	2	1	1	1	3	2	1	0	0	1	20	0	0	1	3	2	3	2	5	1
1891	1	2	0	2	2	1	2	1	1	1	1	3	2	1	0	0	1	20	0	0	1	2	1	3	2	5	1
1924	0	2	0	2	3	0	2	1	1	1	2	2	2	1	0	1	0	20	0	0	1	2	1	2	2	4	1
1950	0	2	0	2	0	0	3	2	1	1	2	3	2	1	0	0	1	20	0	0	1	3	2	3	2	5	1
1983	0	2	0	2	0	1	3	2	1	1	1	3	3	1	0	0	1	20	0	0	1	3	2	3	3	6	1
1992	0	2	0	2	0	1	2	2	1	1	1	3	2	1	0	0	1	20	0	0	1	2	2	3	2	5	1
1994	1	2	0	2	2	1	3	2	0	0	2	2	2	1	1	0	0	20	0	0	1	3	2	2	2	4	1
1996	0	2	0	2	3	0	3	2	1	1	1	2	2	1	0	1	0	20	0	0	1	3	2	2	2	4	1
2015	0	2	0	2	3	0	3	2	1	1	1	2	2	1	0	1	0	20	0	0	1	3	2	2	2	4	1
2031	0	2	0	2	0	1	3	2	1	1	1	3	2	1	0	0	1	20	0	0	1	3	2	3	2	5	1
2066	0	2	0	2	1	1	3	2	0	1	1	3	2	1	0	0	1	20	0	0	1	3	2	3	2	5	1
2085	0	2	0	2	3	0	3	2	0	1	2	3	2	1	0	0	1	20	0	0	1	3	2	3	2	5	1
2192	1	2	0	2	0	1	3	2	0	0	2	2	2	1	1	0	0	20	0	0	1	3	2	2	2	4	1
2206	0	2	0	2	3	0	2	1	1	1	1	2	3	1	0	0	1	20	0	0	1	2	1	2	3	5	1
2207	0	2	0	2	0	0	2	2	1	0	1	2	2	1	0	0	1	20	0	0	1	2	2	2	2	4	1
2289	0	2	0	2	0	1	3	2	1	1	1	3	2	1	0	0	1	20	0	0	1	3	2	3	2	5	1
2311	1	2	0	2	2	0	4	2	1	1	2	3	2	1	0	0	1	20	0	0	1	3	2	3	2	5	1
2351	0	2	0	2	0	1	3	2	1	1	1	3	3	1	0	0	1	20	0	0	1	3	2	3	3	6	1
2385	0	2	0	2	3	0	3	2	1	1	1	2	2	1	0	1	0	20	0	0	1	3	2	2	2	4	1
2420	0	2	0	2	3	0	2	2	0	1	2	2	2	1	0	0	1	20	0	0	1	2	2	2	2	4	1
2566	0	2	0	2	3	0	2	1	1	1	1	2	3	1	0	0	1	20	0	0	1	2	1	2	3	5	1
2615	0	2	0	2	0	0	3	1	1	0	1	3	2	1	0	0	1	20	0	0	1	3	1	3	2	5	1
2674	1	2	0	2	2	1	2	1	1	1	1	3	2	1	0	0	1	20	0	0	1	2	1	3	2	5	1
2676	1	2	0	2	0	1	3	2	0	0	2	2	2	1	1	0	0	20	0	0	1	3	2	2	2	4	1
2693	0	2	0	2	3	0	3	2	1	1	1	2	2	1	0	1	0	20	0	0	1	3	2	2	2	4	1
2701	0	2	0	2	3	1	2	1	1	1	1	2	2	1	0	0	1	20	0	0	1	2	1	2	2	4	1
2707	0	2	0	2	0	1	3	2	1	1	1	3	2	1	0	0	1	20	0	0	1	3	2	3	2	5	1
2759	0	2	0	2	0	0	4	2	1	1	2	3	2	1	0	0	1	20	0	0	1	3	2	3	2	5	1
2770	0	2	0	2	3	0	3	2	0	1	2	3	2	1	0	0	1	20	0	0	1	3	2	3	2	5	1
2796	0	2	0	2	3	1	3	2	0	1	1	3	2	1	0	0	1	20	0	0	1	3	2	3	2	5	1
2809	0	2	0	2	3	0	3	3	0	1	2	3	2	1	0	0	1	20	0	0	1	3	3	3	2	5	1
2818	1	2	0	2	2	1	3	2	0	0	2	2	2	1	1	0	0	20	0	0	1	3	2	2	2	4	1
2829	1	2	0	2	2	1	3	2	1	1	1	2	2	1	0	0	1	20	0	0	1	3	2	2	2	4	1
2836	0	2	0	2	3	0	3	2	1	1	1	2	2	1	0	1	0	20	0	0	1	3	2	2	2	4	1
2866	1	2	0	2	2	1	2	1	1	1	1	2	2	1	0	0	1	20	0	0	1	2	1	2	2	4	1
2887	0	2	0	2	0	1	3	2	0	0	2	2	2	1	1	0	0	20	0	0	1	3	2	2	2	4	1
2907	0	2	0	2	3	0	3	1	1	1	1	3	3	1	0	0	1	20	0	0	1	3	1	3	3	6	1
2917	1	2	0	2	2	1	3	2	0	0	2	2	2	1	1	0	0	20	0	0	1	3	2	2	2	4	1
3008	0	2	0	2	0	1	3	2	1	1	1	3	3	1	0	0	1	20	0	0	1	3	2	3	3	6	1
3027	0	2	0	2	0	1	3	2	0	0	2	2	2	1	1	0	0	20	0	0	1	3	2	2	2	4	1
3049	0	2	0	2	3	1	2	1	1	1	1	2	2	1	0	0	1	20	0	0	1	2	1	2	2	4	1
3084	0	2	0	2	1	1	3	3	0	1	1	3	2	1	0	0	1	20	0	0	1	3	3	3	2	5	1
3107	1	2	0	2	2	1	3	2	0	0	2	2	2	1	1	0	0	20	0	0	1	3	2	2	2	4	1
3114	1	2	0	2	2	1	3	2	0	0	2	2	2	1	1	0	0	20	0	0	1	3	2	2	2	4	1
3119	0	2	0	2	0	1	3	2	1	1	1	3	3	1	0	0	1	20	0	0	1	3	2	3	3	6	1
3190	1	2	0	2	2	1	3	2	0	0	2	2	2	1	1	0	0	20	0	0	1	3	2	2	2	4	1
3243	0	2	0	2	3	0	3	2	1	0	1	2	2	1	0	1	0	20	0	0	1	3	2	2	2	4	1
3285	0	2	0	2	0	1	3	2	0	0	2	2	2	1	1	0	0	20	0	0	1	3	2	2	2	4	1
3327	1	2	0	2	0	1	3	2	0	0	2	2	2	1	1	0	0	20	0	0	1	3	2	2	2	4	1
3459	0	2	0	2	3	0	3	1	1	1	1	3	3	1	0	0	1	20	0	0	1	3	1	3	3	6	1
3509	1	2	0	2	2	1	3	2	0	0	2	2	2	1	1	0	0	20	0	0	1	3	2	2	2	4	1
3522	1	2	0	2	2	1	3	2	1	1	1	2	2	1	0	0	1	20	0	0	1	3	2	2	2	4	1
3558	1	2	0	2	2	1	3	2	0	0	2	2	2	1	1	0	0	20	0	0	1	3	2	2	2	4	1
3597	0	2	0	2	3	1	3	2	1	1	1	3	3	1	0	0	1	20	0	0	1	3	2	3	3	6	1
3605	0	2	0	2	3	0	2	1	1	1	2	2	2	1	0	1	0	20	0	0	1	2	1	2	2	4	1
3679	0	2	0	2	1	1	3	2	0	1	1	3	2	1	0	0	1	20	0	0	1	3	2	3	2	5	1
3692	0	2	0	2	0	0	2	1	0	0	2	2	2	1	1	0	0	20	0	0	1	2	1	2	2	4	1
3697	1	2	0	2	1	1	1	2	1	1	1	2	2	1	0	0	1	20	0	0	1	1	2	2	2	4	1
3700	0	2	0	2	3	0	3	2	1	1	1	2	2	1	0	1	0	20	0	0	1	3	2	2	2	4	1
3717	1	2	0	2	2	1	3	2	0	0	2	2	2	1	1	0	0	20	0	0	1	3	2	2	2	4	1
3719	0	2	0	2	3	0	2	1	1	1	2	2	2	1	0	1	0	20	0	0	1	2	1	2	2	4	1
3833	0	2	0	2	0	0	4	2	1	1	2	3	2	1	0	0	1	20	0	0	1	3	2	3	2	5	1
3927	0	2	0	2	0	1	3	2	1	1	1	2	2	1	0	0	1	20	0	0	1	3	2	2	2	4	1
4001	0	2	0	2	0	1	3	2	0	0	2	2	2	1	1	0	0	20	0	0	1	3	2	2	2	4	1
4019	0	2	0	2	3	0	3	2	1	1	1	2	2	1	0	1	0	20	0	0	1	3	2	2	2	4	1
4199	1	2	0	2	2	0	2	1	1	1	2	2	2	1	1	0	0	20	0	0	1	2	1	2	2	4	1
4200	1	2	0	2	1	1	3	2	1	1	1	2	2	1	0	0	1	20	0	0	1	3	2	2	2	4	1
4242	1	2	0	2	2	0	3	2	0	0	2	2	2	1	1	0	0	20	0	0	1	3	2	2	2	4	1
4270	1	2	0	2	2	1	3	2	0	0	2	2	2	1	1	0	0	20	0	0	1	3	2	2	2	4	1
4290	0	2	0	2	3	0	2	1	1	0	2	2	2	1	0	1	0	20	0	0	1	2	1	2	2	4	1
4306	0	2	0	2	3	0	3	2	1	1	1	2	2	1	0	1	0	20	0	0	1	3	2	2	2	4	1
4327	0	2	0	2	0	1	3	2	1	1	1	3	3	1	0	0	1	20	0	0	1	3	2	3	3	6	1
4382	0	2	0	2	3	0	3	2	1	1	1	2	2	1	0	1	0	20	0	0	1	3	2	2	2	4	1
4396	0	2	0	2	1	1	3	3	0	1	1	3	2	1	0	0	1	20	0	0	1	3	3	3	2	5	1
4411	0	2	0	2	0	1	3	2	0	0	2	2	2	1	1	0	0	20	0	0	1	3	2	2	2	4	1
4413	0	2	0	2	0	0	2	1	1	1	1	2	2	1	0	0	1	20	0	0	1	2	1	2	2	4	1
4439	0	2	0	2	0	1	3	2	1	1	1	3	2	1	0	0	1	20	0	0	1	3	2	3	2	5	1
4457	0	2	0	2	0	1	3	2	0	0	2	2	2	1	1	0	0	20	0	0	1	3	2	2	2	4	1
4462	0	2	0	2	1	1	3	3	0	1	1	3	2	1	0	0	1	20	0	0	1	3	3	3	2	5	1
4478	0	2	0	2	3	0	2	2	0	1	2	3	2	1	0	0	1	20	0	0	1	2	2	3	2	5	1
4510	1	2	0	2	1	1	1	2	1	1	1	2	2	1	0	0	1	20	0	0	1	1	2	2	2	4	1
4539	1	2	0	2	2	1	3	2	1	1	1	2	2	1	0	0	1	20	0	0	1	3	2	2	2	4	1
4551	0	2	0	2	1	1	3	2	1	1	1	2	2	1	0	0	1	20	0	0	1	3	2	2	2	4	1
4560	0	2	0	2	3	1	3	2	1	1	1	3	3	1	0	0	1	20	0	0	1	3	2	3	3	6	1
4613	0	2	0	2	3	0	3	2	0	1	2	2	2	1	0	0	1	20	0	0	1	3	2	2	2	4	1
4690	1	2	0	2	1	1	3	2	1	1	1	2	2	1	0	0	1	20	0	0	1	3	2	2	2	4	1
4741	1	2	0	2	0	1	3	2	0	0	2	2	2	1	1	0	0	20	0	0	1	3	2	2	2	4	1
4761	0	2	0	2	3	0	2	1	1	1	1	2	3	1	0	0	1	20	0	0	1	2	1	2	3	5	1
4782	0	2	0	2	3	0	3	1	1	1	1	3	3	1	0	0	1	20	0	0	1	3	1	3	3	6	1
4794	1	2	0	2	2	1	3	2	0	0	2	2	2	1	1	0	0	20	0	0	1	3	2	2	2	4	1
4808	0	2	0	2	3	1	3	2	1	1	1	3	3	1	0	0	1	20	0	0	1	3	2	3	3	6	1
4837	0	2	0	2	3	0	3	2	1	1	1	2	2	1	0	1	0	20	0	0	1	3	2	2	2	4	1
4879	0	2	0	2	0	1	3	2	0	0	2	2	2	1	1	0	0	20	0	0	1	3	2	2	2	4	1
4915	0	2	0	2	1	1	3	2	1	1	1	2	2	1	0	0	1	20	0	0	1	3	2	2	2	4	1
4928	1	2	0	2	2	1	3	2	0	0	2	2	2	1	1	0	0	20	0	0	1	3	2	2	2	4	1
4974	0	2	0	2	3	1	3	2	1	1	1	3	3	1	0	0	1	20	0	0	1	3	2	3	3	6	1
4979	0	2	0	2	0	1	3	2	0	1	2	2	2	1	1	0	0	20	0	0	1	3	2	2	2	4	1
4980	0	2	0	2	3	0	2	1	1	0	2	2	2	1	0	1	0	20	0	0	1	2	1	2	2	4	1
4996	1	2	0	2	2	1	3	2	1	1	1	2	2	1	0	0	1	20	0	0	1	3	2	2	2	4	1
5028	1	2	0	2	2	1	2	1	1	1	1	3	2	1	0	0	1	20	0	0	1	2	1	3	2	5	1
5047	0	2	0	2	0	0	3	2	1	1	2	3	2	1	0	0	1	20	0	0	1	3	2	3	2	5	1
5070	0	2	0	2	0	1	3	2	1	1	1	2	2	1	0	0	1	20	0	0	1	3	2	2	2	4	1
5116	1	2	0	2	1	1	3	2	1	1	1	2	2	1	0	0	1	20	0	0	1	3	2	2	2	4	1
5161	0	2	0	2	0	1	3	2	1	1	1	3	3	1	0	0	1	20	0	0	1	3	2	3	3	6	1
5167	1	2	0	2	0	1	3	2	0	0	2	2	2	1	1	0	0	20	0	0	1	3	2	2	2	4	1
5208	0	2	0	2	3	1	3	2	0	0	2	2	2	1	1	0	0	20	0	0	1	3	2	2	2	4	1
5216	1	2	0	2	2	1	3	2	1	1	1	2	2	1	0	0	1	20	0	0	1	3	2	2	2	4	1
5222	1	2	0	2	1	1	3	2	1	1	1	2	2	1	0	0	1	20	0	0	1	3	2	2	2	4	1
5245	0	2	0	2	0	1	3	2	1	1	1	3	3	1	0	0	1	20	0	0	1	3	2	3	3	6	1
5262	0	2	0	2	1	1	3	2	1	1	1	2	2	1	0	0	1	20	0	0	1	3	2	2	2	4	1
5287	0	2	0	2	3	1	3	2	0	1	1	3	2	1	0	0	1	20	0	0	1	3	2	3	2	5	1
5289	0	2	0	2	3	0	3	3	0	1	2	3	2	1	0	0	1	20	0	0	1	3	3	3	2	5	1
5313	0	2	0	2	0	0	2	1	1	0	1	3	2	1	0	0	1	20	0	0	1	2	1	3	2	5	1
5332	1	2	0	2	2	1	3	2	1	1	1	2	2	1	0	0	1	20	0	0	1	3	2	2	2	4	1
5337	0	2	0	2	0	0	2	1	0	0	2	2	2	1	1	0	0	20	0	0	1	2	1	2	2	4	1
5365	0	2	0	2	0	1	3	2	1	1	1	3	2	1	0	0	1	20	0	0	1	3	2	3	2	5	1
5391	1	2	0	2	2	1	3	2	0	0	2	2	2	1	1	0	0	20	0	0	1	3	2	2	2	4	1
5419	0	2	0	2	0	1	3	2	0	0	2	2	2	1	1	0	0	20	0	0	1	3	2	2	2	4	1
5425	0	2	0	2	3	0	3	2	0	1	2	3	2	1	0	0	1	20	0	0	1	3	2	3	2	5	1
5431	0	2	0	2	0	1	3	2	0	0	2	2	2	1	1	0	0	20	0	0	1	3	2	2	2	4	1
5445	0	2	0	2	3	0	3	2	1	0	1	2	2	1	0	1	0	20	0	0	1	3	2	2	2	4	1
5446	0	2	0	2	3	1	3	2	0	1	1	3	2	1	0	0	1	20	0	0	1	3	2	3	2	5	1
5454	1	2	0	2	1	1	3	2	1	1	1	2	2	1	0	0	1	20	0	0	1	3	2	2	2	4	1
5461	1	2	0	2	2	0	4	2	1	1	2	3	2	1	0	0	1	20	0	0	1	3	2	3	2	5	1
5471	0	2	0	2	3	0	3	2	1	1	1	2	2	1	0	1	0	20	0	0	1	3	2	2	2	4	1
5512	1	2	0	2	2	1	3	2	0	0	2	2	2	1	1	0	0	20	0	0	1	3	2	2	2	4	1
5517	0	2	0	2	0	1	4	2	1	1	1	3	2	1	0	0	1	20	0	0	1	3	2	3	2	5	1
5546	1	2	0	2	2	1	3	2	0	0	2	2	2	1	1	0	0	20	0	0	1	3	2	2	2	4	1
5568	0	2	0	2	3	0	2	1	1	0	2	2	2	1	0	1	0	20	0	0	1	2	1	2	2	4	1
5585	1	2	0	2	2	1	3	2	0	0	2	2	2	1	1	0	0	20	0	0	1	3	2	2	2	4	1
5605	0	2	0	2	0	0	3	2	0	1	2	2	2	1	1	0	0	20	0	0	1	3	2	2	2	4	1
5621	0	2	0	2	0	1	2	1	0	1	0	2	2	1	1	0	0	20	0	0	1	2	1	2	2	4	1
5628	0	2	0	2	3	0	2	1	1	0	2	2	2	1	0	1	0	20	0	0	1	2	1	2	2	4	1
5649	0	2	0	2	1	1	3	3	0	1	1	3	2	1	0	0	1	20	0	0	1	3	3	3	2	5	1
5651	0	2	0	2	0	1	3	2	0	0	2	2	2	1	1	0	0	20	0	0	1	3	2	2	2	4	1
5652	1	2	0	2	2	1	2	1	1	1	1	3	2	1	0	0	1	20	0	0	1	2	1	3	2	5	1
5653	0	2	0	2	0	1	3	2	0	0	2	2	2	1	1	0	0	20	0	0	1	3	2	2	2	4	1
5654	1	2	0	2	2	1	2	1	1	1	1	2	2	1	0	0	1	20	0	0	1	2	1	2	2	4	1
5695	0	2	0	2	3	0	2	1	1	0	2	2	2	1	0	1	0	20	0	0	1	2	1	2	2	4	1
5703	1	2	0	2	2	1	3	2	0	0	2	2	2	1	1	0	0	20	0	0	1	3	2	2	2	4	1
5722	1	2	0	2	2	1	2	1	1	1	1	2	2	1	0	0	1	20	0	0	1	2	1	2	2	4	1
5742	0	2	0	2	0	1	3	2	1	1	1	3	3	1	0	0	1	20	0	0	1	3	2	3	3	6	1
5746	0	2	0	2	4	0	3	2	0	1	2	3	2	1	0	0	1	20	0	0	1	3	2	3	2	5	1
5754	1	2	0	2	2	0	2	1	1	1	2	2	2	1	1	0	0	20	0	0	1	2	1	2	2	4	1
5758	0	2	0	2	3	1	3	2	0	0	2	2	2	1	1	0	0	20	0	0	1	3	2	2	2	4	1
5793	0	2	0	2	3	0	3	1	1	1	1	3	3	1	0	0	1	20	0	0	1	3	1	3	3	6	1
5796	0	2	0	2	1	1	3	2	1	1	1	2	2	1	0	0	1	20	0	0	1	3	2	2	2	4	1
5831	0	2	0	2	0	1	3	2	0	0	2	2	2	1	1	0	0	20	0	0	1	3	2	2	2	4	1
5837	0	2	0	2	0	1	3	2	1	1	1	3	2	1	0	0	1	20	0	0	1	3	2	3	2	5	1
5843	0	2	0	2	1	1	3	3	0	1	1	3	2	1	0	0	1	20	0	0	1	3	3	3	2	5	1
5860	0	2	0	2	0	1	3	2	0	0	2	2	2	1	1	0	0	20	0	0	1	3	2	2	2	4	1
5875	0	2	0	2	3	1	3	2	1	1	1	3	3	1	0	0	1	20	0	0	1	3	2	3	3	6	1
5878	1	2	0	2	2	1	2	1	1	1	1	3	2	1	0	0	1	20	0	0	1	2	1	3	2	5	1
5894	0	2	0	2	0	1	3	2	1	1	1	3	2	1	0	0	1	20	0	0	1	3	2	3	2	5	1
5939	0	2	0	2	0	1	3	2	1	1	1	3	2	1	0	0	1	20	0	0	1	3	2	3	2	5	1
6481	0	2	0	2	3	0	2	1	1	1	2	2	2	2	0	1	0	20	0	0	1	2	1	2	2	4	1
6711	0	2	0	2	3	0	2	2	0	1	2	2	2	3	0	0	1	20	0	0	1	2	2	2	2	4	1
6728	0	2	0	2	0	0	2	2	1	0	1	2	2	3	0	0	1	20	0	0	1	2	2	2	2	4	1
6736	0	2	0	2	3	0	2	2	0	1	2	2	2	3	0	0	1	20	0	0	1	2	2	2	2	4	1
33	1	3	0	2	3	0	1	1	0	0	2	1	1	1	0	0	0	20	0	1	0	1	1	1	1	2	0
37	1	3	0	2	2	0		2	1	1	2	3	3	1	0	0	1	20	0	1	1		2	3	3	6	1
46	1	3	0	2	0	0	1	2	0	0	2	1	2	1	0	0	0	20	0	1	0	1	2	1	2	3	0
54	1	3	0	2	0	0	2	1	0	0	2	2	2	1	0	0	0	20	0	1	0	2	1	2	2	4	0
72	1	3	0	2	1	1	2	2	0	1	1	2	2	1	0	0	1	20	0	1	1	2	2	2	2	4	1
88	0	3	0	2	0	1		2	0	1	2	3	3	1	1	0	0	20	0	1	1		2	3	3	6	1
97	0	3	0	2	0	0	3	1	1	0	2	3	2	1	0	0	1	20	0	1	1	3	1	3	2	5	1
98	1	3	0	2	2	0		2	0	0	2	3	3	1	0	0	0	20	0	1	0		2	3	3	6	0
132	1	3	0	2	0	0	2	1	0	0	2	2	2	1	0	0	0	20	0	1	0	2	1	2	2	4	0
135	1	3	0	2	2	0		2	1	1	2	3	3	1	0	0	1	20	0	1	1		2	3	3	6	1
147	0	3	0	2	0	0	3	2	1	0	2	3	2	1	0	0	1	20	0	1	1	3	2	3	2	5	1
209	1	3	0	2	2	0	3	1	0	0	2	3	3	1	0	0	0	20	0	1	0	3	1	3	3	6	0
218	1	3	0	2	2	0		2	1	1	2	3	3	1	0	0	1	20	0	1	1		2	3	3	6	1
224	1	3	0	2	2	0		2	0	0	2	3	3	1	0	0	0	20	0	1	0		2	3	3	6	0
246	1	3	0	2	2	0		2	1	1	2	3	3	1	0	0	1	20	0	1	1		2	3	3	6	1
270	1	3	0	2	2	0	3	1	0	0	2	3	3	1	0	0	0	20	0	1	0	3	1	3	3	6	0
300	1	3	0	2	1	1	2	1	0	1	1	2	1	1	0	0	1	20	0	1	1	2	1	2	1	3	1
326	0	3	0	2	0	1		2	1	1	1	3	3	1	0	0	1	20	0	1	1		2	3	3	6	1
333	1	3	0	2	2	0		2	0	0	2	3	3	1	0	0	0	20	0	1	0		2	3	3	6	0
359	1	3	0	2	0	0	2	1	0	0	2	2	2	1	0	0	0	20	0	1	0	2	1	2	2	4	0
370	0	3	0	2	0	0	3	3	0	0	2	2	3	1	1	0	0	20	0	1	1	3	3	2	3	5	1
373	1	3	0	2	0	0	2	1	0	0	2	2	2	1	0	0	0	20	0	1	0	2	1	2	2	4	0
389	1	3	0	2	2	0		2	0	0	2	3	3	1	0	0	0	20	0	1	0		2	3	3	6	0
391	1	3	0	2	0	0		2	0	0	2	3	3	1	0	0	0	20	0	1	0		2	3	3	6	0
393	1	3	0	2	2	0	3	1	0	0	2	3	3	1	0	0	0	20	0	1	0	3	1	3	3	6	0
399	1	3	0	2	3	0	2	1	0	1	2	2	2	1	0	0	0	20	0	1	0	2	1	2	2	4	0
423	0	3	0	2	4	1		2	1	1	0	3	3	1	0	1	0	20	0	1	1		2	3	3	6	1
533	0	3	0	2	0	0	3	3	0	0	2	3	3	1	1	0	0	20	0	1	1	3	3	3	3	6	1
537	0	3	0	2	0	1		2	0	1	2	3	3	1	1	0	0	20	0	1	1		2	3	3	6	1
601	1	3	0	2	3	0		2	0	1	2	3	3	1	0	0	0	20	0	1	0		2	3	3	6	0
618	1	3	0	2	2	0	2	1	1	0	2	2	1	1	1	0	0	20	0	1	1	2	1	2	1	3	1
625	1	3	0	2	3	0		2	0	1	2	3	3	1	0	0	0	20	0	1	0		2	3	3	6	0
626	1	3	0	2	1	1	2	2	0	1	1	2	2	1	0	0	1	20	0	1	1	2	2	2	2	4	1
643	1	3	0	2	2	0	3	3	1	0	2	3	4	1	1	0	0	20	0	1	1	3	3	3	3	6	1
673	0	3	0	2	1	1	2	1	0	1	1	2	1	1	0	0	1	20	0	1	1	2	1	2	1	3	1
677	1	3	0	2	0	0	1	2	0	0	2	1	2	1	0	0	0	20	0	1	0	1	2	1	2	3	0
706	1	3	0	2	2	0		2	0	0	2	3	3	1	0	0	0	20	0	1	0		2	3	3	6	0
710	1	3	0	2	2	0		2	0	0	2	3	3	1	0	0	0	20	0	1	0		2	3	3	6	0
731	1	3	0	2	0	0	2	1	0	0	2	2	2	1	0	0	0	20	0	1	0	2	1	2	2	4	0
736	1	3	0	2	2	0		2	1	1	2	3	3	1	0	0	1	20	0	1	1		2	3	3	6	1
745	1	3	0	2	2	0	3	1	1	1	2	3	2	1	0	0	1	20	0	1	1	3	1	3	2	5	1
747	0	3	0	2	4	1		2	1	1	0	3	3	1	0	1	0	20	0	1	1		2	3	3	6	1
763	1	3	0	2	2	0		2	1	1	2	3	3	1	0	0	1	20	0	1	1		2	3	3	6	1
767	1	3	0	2	1	1	2	2	0	1	1	2	1	1	0	0	1	20	0	1	1	2	2	2	1	3	1
770	0	3	0	2	3	1	3	3	1	1	1	3	3	1	0	0	1	20	0	1	1	3	3	3	3	6	1
782	1	3	0	2	3	0	2	2	0	0	2	2	2	1	0	0	0	20	0	1	0	2	2	2	2	4	0
806	1	3	0	2	1	1	3	3	0	1	2	3	3	1	1	0	0	20	0	1	1	3	3	3	3	6	1
816	0	3	0	2	0	0	3	1	1	0	2	3	2	1	0	0	1	20	0	1	1	3	1	3	2	5	1
839	1	3	0	2	2	0		2	1	1	2	3	3	1	0	0	1	20	0	1	1		2	3	3	6	1
860	0	3	0	2	3	1	3	3	1	1	1	3	3	1	0	0	1	20	0	1	1	3	3	3	3	6	1
887	1	3	0	2	2	0		2	1	1	2	3	3	1	0	0	1	20	0	1	1		2	3	3	6	1
893	1	3	0	2	3	0	2	2	0	0	2	2	2	1	0	0	0	20	0	1	0	2	2	2	2	4	0
901	1	3	0	2	2	0		2	1	1	2	3	3	1	0	0	1	20	0	1	1		2	3	3	6	1
958	1	3	0	2	2	0		2	0	0	2	3	3	1	0	0	0	20	0	1	0		2	3	3	6	0
965	0	3	0	2	0	1		2	0	1	2	3	3	1	1	0	0	20	0	1	1		2	3	3	6	1
973	1	3	0	2	2	1	3	3	0	1	2	3	3	1	1	0	0	20	0	1	1	3	3	3	3	6	1
978	1	3	0	2	2	0	3	1	0	0	2	3	3	1	0	0	0	20	0	1	0	3	1	3	3	6	0
994	0	3	0	2	0	1	3	3	1	1	2	3	3	1	1	0	0	20	0	1	1	3	3	3	3	6	1
1016	1	3	0	2	2	0	3	1	0	0	2	3	3	1	0	0	0	20	0	1	0	3	1	3	3	6	0
1063	0	3	0	2	0	0	3	3	0	1	2	3	3	1	1	0	0	20	0	1	1	3	3	3	3	6	1
1082	0	3	0	2	0	1		2	1	1	1	3	3	1	0	0	1	20	0	1	1		2	3	3	6	1
1087	0	3	0	2	0	1		2	1	1	1	3	3	1	0	0	1	20	0	1	1		2	3	3	6	1
1090	1	3	0	2	2	0		2	0	0	2	3	3	1	0	0	0	20	0	1	0		2	3	3	6	0
1095	1	3	0	2	0	1		2	1	1	2	3	3	1	0	0	0	20	0	1	0		2	3	3	6	0
1105	1	3	0	2	2	1	3	3	0	1	2	3	3	1	1	0	0	20	0	1	1	3	3	3	3	6	1
1110	1	3	0	2	2	0		2	1	1	2	3	3	1	0	0	1	20	0	1	1		2	3	3	6	1
1113	1	3	0	2	2	0		2	0	0	2	3	3	1	0	0	0	20	0	1	0		2	3	3	6	0
1116	0	3	0	2	0	1	3	1	1	1	2	3	2	1	1	0	0	20	0	1	1	3	1	3	2	5	1
1134	1	3	0	2	0	0	2	1	0	0	2	2	2	1	0	0	0	20	0	1	0	2	1	2	2	4	0
1163	0	3	0	2	0	1		2	1	1	1	3	3	1	0	0	1	20	0	1	1		2	3	3	6	1
1173	1	3	0	2	0	0		2	0	0	2	3	3	1	0	0	0	20	0	1	0		2	3	3	6	0
1220	0	3	0	2	0	1	3	3	1	1	2	3	3	1	1	0	0	20	0	1	1	3	3	3	3	6	1
1244	1	3	0	2	1	1		2	0	1	2	3	3	1	0	0	0	20	0	1	0		2	3	3	6	0
1251	1	3	0	2	2	0	3	3	1	0	2	3	4	1	1	0	0	20	0	1	1	3	3	3	3	6	1
1391	0	3	0	2	4	1	1	1	1	1	0	1	1	2	0	1	0	20	0	1	1	1	1	1	1	2	1
1392	0	3	0	2	4	1	1	1	1	1	0	1	1	2	0	1	0	20	0	1	1	1	1	1	1	2	1
1482	0	3	0	2	2	0	2	2	0	0	2	2	2	1	0	0	0	20	0	0	0	2	2	2	2	4	0
1510	1	3	0	2	2	0		2	0	0	2	3	3	1	0	0	0	20	0	0	0		2	3	3	6	0
1516	0	3	0	2	3	1	3	3	1	1	2	3	3	1	1	0	0	20	0	0	1	3	3	3	3	6	1
1524	0	3	0	2	3	1	2	2	1	1	1	2	2	1	0	0	1	20	0	0	1	2	2	2	2	4	1
1540	1	3	0	2	3	0	2	2	0	0	2	2	2	1	0	0	0	20	0	0	0	2	2	2	2	4	0
1545	1	3	0	2	3	0		2	0	1	2	3	3	1	0	0	0	20	0	0	0		2	3	3	6	0
1574	1	3	0	2	1	1	2	2	0	1	1	2	2	1	0	0	1	20	0	0	1	2	2	2	2	4	1
1602	1	3	0	2	0	0	2	1	0	0	2	2	2	1	0	0	0	20	0	0	0	2	1	2	2	4	0
1605	1	3	0	2	2	0	2	1	1	0	2	2	1	1	1	0	0	20	0	0	1	2	1	2	1	3	1
1614	1	3	0	2	2	0		2	1	1	2	3	3	1	0	0	1	20	0	0	1		2	3	3	6	1
1636	0	3	0	2	0	0	3	1	1	0	1	3	2	1	0	0	1	20	0	0	1	3	1	3	2	5	1
1654	0	3	0	2	0	0	3	1	1	0	1	3	2	1	0	0	1	20	0	0	1	3	1	3	2	5	1
1661	0	3	0	2	1	1	2	1	0	1	1	2	1	1	0	0	1	20	0	0	1	2	1	2	1	3	1
1675	0	3	0	2	3	1	3	2	1	1	1	3	3	1	0	0	1	20	0	0	1	3	2	3	3	6	1
1678	0	3	0	2	0	1	3	3	1	1	2	3	3	1	1	0	0	20	0	0	1	3	3	3	3	6	1
1679	1	3	0	2	0	0	1	2	0	0	2	1	2	1	0	0	0	20	0	0	0	1	2	1	2	3	0
1682	1	3	0	2	0	0	1	2	0	0	2	1	2	1	0	0	0	20	0	0	0	1	2	1	2	3	0
1700	1	3	0	2	3	0	2	1	0	1	2	2	2	1	0	0	0	20	0	0	0	2	1	2	2	4	0
1712	1	3	0	2	2	0		2	0	0	2	3	3	1	0	0	0	20	0	0	0		2	3	3	6	0
1718	1	3	0	2	2	0	3	3	1	0	2	3	4	1	1	0	0	20	0	0	1	3	3	3	3	6	1
1722	0	3	0	2	0	1		2	0	1	2	3	3	1	1	0	0	20	0	0	1		2	3	3	6	1
1785	0	3	0	2	0	0	3	3	0	0	2	3	3	1	1	0	0	20	0	0	1	3	3	3	3	6	1
1823	1	3	0	2	2	0		2	0	0	2	3	3	1	0	0	0	20	0	0	0		2	3	3	6	0
1850	1	3	0	2	2	0		2	0	0	2	3	3	1	0	0	0	20	0	0	0		2	3	3	6	0
1851	0	3	0	2	4	0	3	2	0	0	2	3	2	1	0	0	1	20	0	0	1	3	2	3	2	5	1
1890	0	3	0	2	0	0	3	1	1	0	2	3	2	1	0	0	1	20	0	0	1	3	1	3	2	5	1
1894	1	3	0	2	1	1	2	1	0	1	1	2	1	1	0	0	1	20	0	0	1	2	1	2	1	3	1
1896	1	3	0	2	2	0		2	0	0	2	3	3	1	0	0	0	20	0	0	0		2	3	3	6	0
1921	1	3	0	2	0	0		2	0	0	2	3	3	1	0	0	0	20	0	0	0		2	3	3	6	0
1929	1	3	0	2	2	0		2	1	1	2	3	3	1	0	0	1	20	0	0	1		2	3	3	6	1
1931	1	3	0	2	3	0	1	1	0	0	2	1	1	1	0	0	0	20	0	0	0	1	1	1	1	2	0
1935	0	3	0	2	4	0		2	0	1	2	3	3	1	0	0	0	20	0	0	0		2	3	3	6	0
1939	1	3	0	2	2	0	3	3	1	0	2	3	4	1	1	0	0	20	0	0	1	3	3	3	3	6	1
1972	0	3	0	2	3	1	2	2	1	1	1	2	2	1	0	0	1	20	0	0	1	2	2	2	2	4	1
1975	1	3	0	2	3	0	2	2	0	0	2	2	2	1	0	0	0	20	0	0	0	2	2	2	2	4	0
1985	1	3	0	2	2	0	3	1	1	0	2	3	3	1	1	0	0	20	0	0	1	3	1	3	3	6	1
1987	0	3	0	2	3	1	3	3	1	1	1	3	3	1	0	0	1	20	0	0	1	3	3	3	3	6	1
1991	0	3	0	2	4	0	1	2	0	1	2	2	2	1	0	0	0	20	0	0	0	1	2	2	2	4	0
2007	0	3	0	2	0	0	3	1	0	1	2	3	2	1	1	0	0	20	0	0	1	3	1	3	2	5	1
2069	1	3	0	2	3	1	2	3	0	1	1	2	1	1	0	0	1	20	0	0	1	2	3	2	1	3	1
2073	0	3	0	2	0	1	3	3	1	1	2	3	3	1	1	0	0	20	0	0	1	3	3	3	3	6	1
2088	0	3	0	2	0	0	3	3	0	0	2	3	3	1	1	0	0	20	0	0	1	3	3	3	3	6	1
2107	0	3	0	2	0	1		2	0	1	2	3	3	1	1	0	0	20	0	0	1		2	3	3	6	1
2164	0	3	0	2	4	1		2	1	1	0	3	3	1	0	1	0	20	0	0	1		2	3	3	6	1
2241	1	3	0	2	0	0	1	2	0	0	2	1	2	1	0	0	0	20	0	0	0	1	2	1	2	3	0
2278	0	3	0	2	2	0	2	2	0	0	2	2	2	1	0	0	0	20	0	0	0	2	2	2	2	4	0
2296	0	3	0	2	0	1		2	0	1	2	3	3	1	1	0	0	20	0	0	1		2	3	3	6	1
2308	1	3	0	2	2	0		2	1	1	2	3	3	1	0	0	1	20	0	0	1		2	3	3	6	1
2310	1	3	0	2	3	0		2	0	1	2	3	3	1	0	0	0	20	0	0	0		2	3	3	6	0
2353	1	3	0	2	2	0	3	1	1	0	2	3	3	1	1	0	0	20	0	0	1	3	1	3	3	6	1
2383	1	3	0	2	2	0		2	0	0	2	3	3	1	0	0	0	20	0	0	0		2	3	3	6	0
2403	1	3	0	2	3	0	2	2	0	0	2	2	2	1	0	0	0	20	0	0	0	2	2	2	2	4	0
2424	1	3	0	2	1	1	2	2	0	1	1	2	2	1	0	0	1	20	0	0	1	2	2	2	2	4	1
2428	0	3	0	2	0	1	3	3	1	1	1	3	3	1	0	0	1	20	0	0	1	3	3	3	3	6	1
2431	1	3	0	2	0	1		2	1	1	2	3	3	1	0	0	0	20	0	0	0		2	3	3	6	0
2434	0	3	0	2	0	1	3	3	1	1	1	3	3	1	0	0	1	20	0	0	1	3	3	3	3	6	1
2449	1	3	0	2	2	0		2	0	0	2	3	3	1	0	0	0	20	0	0	0		2	3	3	6	0
2474	1	3	0	2	3	0	2	2	0	0	2	2	2	1	0	0	0	20	0	0	0	2	2	2	2	4	0
2524	0	3	0	2	0	1	3	1	1	1	2	3	2	1	1	0	0	20	0	0	1	3	1	3	2	5	1
2546	1	3	0	2	1	1	2	2	0	1	1	2	2	1	0	0	1	20	0	0	1	2	2	2	2	4	1
2562	1	3	0	2	2	0	3	1	0	0	2	3	3	1	0	0	0	20	0	0	0	3	1	3	3	6	0
2567	1	3	0	2	2	0	3	1	0	0	2	3	3	1	0	0	0	20	0	0	0	3	1	3	3	6	0
2599	1	3	0	2	2	0		2	1	1	2	3	3	1	0	0	1	20	0	0	1		2	3	3	6	1
2621	1	3	0	2	2	0		2	0	0	2	3	3	1	0	0	0	20	0	0	0		2	3	3	6	0
2647	0	3	0	2	0	1	3	1	0	1	0	3	2	1	1	0	0	20	0	0	1	3	1	3	2	5	1
2651	0	3	0	2	0	1		2	0	1	2	3	3	1	1	0	0	20	0	0	1		2	3	3	6	1
2670	0	3	0	2	0	1	3	3	1	1	1	3	3	1	0	0	1	20	0	0	1	3	3	3	3	6	1
2689	0	3	0	2	0	1	3	3	1	1	2	3	3	1	1	0	0	20	0	0	1	3	3	3	3	6	1
2719	1	3	0	2	2	0		2	0	0	2	3	3	1	0	0	0	20	0	0	0		2	3	3	6	0
2735	0	3	0	2	3	1	3	3	1	1	1	3	3	1	0	0	1	20	0	0	1	3	3	3	3	6	1
2736	1	3	0	2	2	0		2	0	0	2	3	3	1	0	0	0	20	0	0	0		2	3	3	6	0
2766	1	3	0	2	1	1	3	3	0	1	2	3	3	1	1	0	0	20	0	0	1	3	3	3	3	6	1
2772	0	3	0	2	3	1	3	3	1	1	1	3	3	1	0	0	1	20	0	0	1	3	3	3	3	6	1
2781	1	3	0	2	3	0	2	2	0	0	2	2	2	1	0	0	0	20	0	0	0	2	2	2	2	4	0
2782	1	3	0	2	2	0		2	0	0	2	3	3	1	0	0	0	20	0	0	0		2	3	3	6	0
2808	1	3	0	2	0	0	2	1	0	0	2	2	2	1	0	0	0	20	0	0	0	2	1	2	2	4	0
2824	1	3	0	2	0	0	2	1	0	0	2	2	2	1	0	0	0	20	0	0	0	2	1	2	2	4	0
2837	1	3	0	2	2	0		2	0	0	2	3	3	1	0	0	0	20	0	0	0		2	3	3	6	0
2841	0	3	0	2	0	0	3	3	0	0	2	3	3	1	1	0	0	20	0	0	1	3	3	3	3	6	1
2857	1	3	0	2	2	0	2	1	0	1	2	2	2	1	0	0	0	20	0	0	0	2	1	2	2	4	0
2867	1	3	0	2	2	0	3	1	1	0	2	3	3	1	1	0	0	20	0	0	1	3	1	3	3	6	1
2881	1	3	0	2	2	0	3	1	0	0	2	3	3	1	0	0	0	20	0	0	0	3	1	3	3	6	0
2883	0	3	0	2	0	0	2	1	0	1	2	2	2	1	1	0	0	20	0	0	1	2	1	2	2	4	1
2889	1	3	0	2	1	1		2	0	1	1	3	3	1	0	0	1	20	0	0	1		2	3	3	6	1
2894	0	3	0	2	0	0	2	1	0	1	2	2	2	1	1	0	0	20	0	0	1	2	1	2	2	4	1
2901	0	3	0	2	0	0	3	1	1	0	2	3	2	1	0	0	1	20	0	0	1	3	1	3	2	5	1
2902	0	3	0	2	0	0	3	3	0	1	2	3	3	1	1	0	0	20	0	0	1	3	3	3	3	6	1
2904	1	3	0	2	2	0	3	3	1	0	2	3	4	1	1	0	0	20	0	0	1	3	3	3	3	6	1
2916	1	3	0	2	2	0	3	3	1	0	2	3	4	1	1	0	0	20	0	0	1	3	3	3	3	6	1
2930	0	3	0	2	0	0	3	1	1	0	2	3	2	1	0	0	1	20	0	0	1	3	1	3	2	5	1
2935	1	3	0	2	2	0		2	1	1	2	3	3	1	0	0	1	20	0	0	1		2	3	3	6	1
2936	0	3	0	2	3	1	2	2	1	1	1	2	2	1	0	0	1	20	0	0	1	2	2	2	2	4	1
2944	0	3	0	2	0	1		2	0	1	2	3	3	1	1	0	0	20	0	0	1		2	3	3	6	1
2946	1	3	0	2	3	0	2	2	0	0	2	2	2	1	0	0	0	20	0	0	0	2	2	2	2	4	0
2970	1	3	0	2	2	0		2	0	0	2	3	3	1	0	0	0	20	0	0	0		2	3	3	6	0
2977	0	3	0	2	0	0	3	3	0	0	2	2	3	1	1	0	0	20	0	0	1	3	3	2	3	5	1
2984	0	3	0	2	4	0	3	2	0	0	2	3	2	1	0	0	1	20	0	0	1	3	2	3	2	5	1
2988	1	3	0	2	1	1	3	3	0	1	2	3	3	1	1	0	0	20	0	0	1	3	3	3	3	6	1
2996	0	3	0	2	0	1	3	3	1	1	1	3	3	1	0	0	1	20	0	0	1	3	3	3	3	6	1
2998	1	3	0	2	2	0	2	1	0	1	2	2	2	1	0	0	0	20	0	0	0	2	1	2	2	4	0
3023	0	3	0	2	0	0	3	1	0	1	2	3	2	1	1	0	0	20	0	0	1	3	1	3	2	5	1
3037	1	3	0	2	2	0		2	1	1	2	3	3	1	0	0	1	20	0	0	1		2	3	3	6	1
3053	1	3	0	2	0	0	2	1	0	0	2	2	2	1	0	0	0	20	0	0	0	2	1	2	2	4	0
3059	1	3	0	2	2	0		2	0	0	2	3	3	1	0	0	0	20	0	0	0		2	3	3	6	0
3066	1	3	0	2	2	0		2	0	0	2	3	3	1	0	0	0	20	0	0	0		2	3	3	6	0
3070	1	3	0	2	0	1		2	1	1	2	3	3	1	0	0	0	20	0	0	0		2	3	3	6	0
3071	0	3	0	2	0	0	3	3	0	0	2	2	3	1	1	0	0	20	0	0	1	3	3	2	3	5	1
3088	1	3	0	2	2	0		2	1	1	2	3	3	1	0	0	1	20	0	0	1		2	3	3	6	1
3089	1	3	0	2	3	0	2	1	0	1	2	2	2	1	0	0	0	20	0	0	0	2	1	2	2	4	0
3106	0	3	0	2	4	0	3	2	0	0	2	3	2	1	0	0	1	20	0	0	1	3	2	3	2	5	1
3109	0	3	0	2	4	0	3	2	0	0	2	3	2	1	0	0	1	20	0	0	1	3	2	3	2	5	1
3126	1	3	0	2	2	0		2	1	1	2	3	3	1	0	0	1	20	0	0	1		2	3	3	6	1
3131	0	3	0	2	0	0	3	1	1	0	2	3	2	1	0	0	1	20	0	0	1	3	1	3	2	5	1
3137	1	3	0	2	3	0		2	0	1	2	3	3	1	0	0	0	20	0	0	0		2	3	3	6	0
3162	0	3	0	2	1	1	2	1	0	1	1	2	1	1	0	0	1	20	0	0	1	2	1	2	1	3	1
3166	0	3	0	2	0	1	3	1	1	1	2	3	2	1	1	0	0	20	0	0	1	3	1	3	2	5	1
3170	1	3	0	2	3	0	2	2	0	0	2	2	2	1	0	0	0	20	0	0	0	2	2	2	2	4	0
3191	1	3	0	2	0	0	1	2	0	0	2	1	2	1	0	0	0	20	0	0	0	1	2	1	2	3	0
3206	1	3	0	2	3	0	2	2	0	0	2	2	2	1	0	0	0	20	0	0	0	2	2	2	2	4	0
3216	1	3	0	2	1	1	2	2	0	1	1	2	2	1	0	0	1	20	0	0	1	2	2	2	2	4	1
3218	1	3	0	2	2	0	2	1	0	0	2	2	2	1	0	0	0	20	0	0	0	2	1	2	2	4	0
3226	0	3	0	2	0	1		2	1	1	1	3	3	1	0	0	1	20	0	0	1		2	3	3	6	1
3228	1	3	0	2	2	0		2	0	0	2	3	3	1	0	0	0	20	0	0	0		2	3	3	6	0
3230	0	3	0	2	4	0	3	2	0	0	2	3	2	1	0	0	1	20	0	0	1	3	2	3	2	5	1
3239	0	3	0	2	0	1	3	3	1	1	1	3	3	1	0	0	1	20	0	0	1	3	3	3	3	6	1
3246	1	3	0	2	2	0		2	0	0	2	3	3	1	0	0	0	20	0	0	0		2	3	3	6	0
3247	1	3	0	2	2	0		2	0	0	2	3	3	1	0	0	0	20	0	0	0		2	3	3	6	0
3262	0	3	0	2	0	1		2	1	1	1	3	3	1	0	0	1	20	0	0	1		2	3	3	6	1
3266	1	3	0	2	2	0		2	0	0	2	3	3	1	0	0	0	20	0	0	0		2	3	3	6	0
3286	1	3	0	2	0	0	2	1	0	0	2	2	2	1	0	0	0	20	0	0	0	2	1	2	2	4	0
3288	1	3	0	2	2	0	2	1	1	0	2	2	1	1	1	0	0	20	0	0	1	2	1	2	1	3	1
3294	0	3	0	2	4	0	3	2	0	0	2	3	2	1	0	0	1	20	0	0	1	3	2	3	2	5	1
3306	0	3	0	2	0	0	3	3	1	0	2	3	2	1	0	0	1	20	0	0	1	3	3	3	2	5	1
3307	0	3	0	2	3	1		2	1	1	1	3	3	1	0	0	1	20	0	0	1		2	3	3	6	1
3309	1	3	0	2	2	0	3	3	1	0	2	3	4	1	1	0	0	20	0	0	1	3	3	3	3	6	1
3317	1	3	0	2	0	0	2	1	0	0	2	2	2	1	0	0	0	20	0	0	0	2	1	2	2	4	0
3325	1	3	0	2	0	1	2	1	1	1	2	2	2	1	0	0	0	20	0	0	0	2	1	2	2	4	0
3344	0	3	0	2	1	1	2	1	0	1	1	2	1	1	0	0	1	20	0	0	1	2	1	2	1	3	1
3348	0	3	0	2	0	1	3	3	1	1	1	3	3	1	0	0	1	20	0	0	1	3	3	3	3	6	1
3363	1	3	0	2	3	0	2	2	0	0	2	2	2	1	0	0	0	20	0	0	0	2	2	2	2	4	0
3372	1	3	0	2	1	1	2	2	0	1	1	2	1	1	0	0	1	20	0	0	1	2	2	2	1	3	1
3394	0	3	0	2	4	0		2	0	1	2	3	3	1	0	0	0	20	0	0	0		2	3	3	6	0
3407	1	3	0	2	2	0		2	1	1	2	3	3	1	0	0	1	20	0	0	1		2	3	3	6	1
3410	1	3	0	2	3	0	2	2	0	0	2	2	2	1	0	0	0	20	0	0	0	2	2	2	2	4	0
3427	0	3	0	2	2	0	2	2	0	0	2	2	2	1	0	0	0	20	0	0	0	2	2	2	2	4	0
3430	1	3	0	2	2	0		2	0	0	2	3	3	1	0	0	0	20	0	0	0		2	3	3	6	0
[truncated: 3,948 more rows]

## Sheet: Foglio3
Households	European	St Dev European	Immigrant	Dev st Immigrant
1	0.57873	0.493966	0.753488	0.431482
2	0.631489	0.482539	0.771712	0.420251
3	0.251676	0.434073	0.12	0.328261
4	0.136671	0.343733
Households	European	Immigrant	St Dev European	Dev st Immigrant
1
2
3
4
	1st quartile	2nd quartile	3rd quartile	4th quartile
European	0.57873	0.631489	0.251676	0.13
Immigrant	0.753488	0.771712	0.12
North West	1st quartile	2nd quartile	3rd quartile	4th quartile
European	0.67	0.72	0.21	0.03
Immigrant	0.825688	0.74269	0.28
North Est	1st quartile	2nd quartile	3rd quartile	4th quartile
European	0.83	1.01	0.27	0.17
Immigrant	0.88	0.79	0.98
Central	1st quartile	2nd quartile	3rd quartile	4th quartile
European	0.67	0.6	0.251676	0.26
Immigrant	0.88	0.59	0.19
South	1st quartile	2nd quartile	3rd quartile	4th quartile
European	0.45	0.67	0.3	0.14
Immigrant	0.78	0.61	0.11
Islands	1st quartile	2nd quartile	3rd quartile	4th quartile
European	0.42	0.25	0.17	0.12
Immigrant	0.78	0.72

## Sheet: raw immigrants
id	sex	areas	Immigrants	households	breastfeeding	pacifiernight	Fatheroccprofile	motheroccprofile	smokinghabits	cariogenicdiet	brushingteeth	lowedulevelfatather	lowedulevelmother	nkids	enamel	precavitated	cavitated	teethpresent	filled	bleeding	cariestotal	fatherocc2	motherocc2	fathered	mothered	parentsed	cariesEx
1263	1	1	1	1	1	0	1	1	0	1	2	1	1	1	0	1	0	20	0	1	1	1	1	1	1	2	1
1266	1	1	1	1	3	0	1	1	0	0	2	1	1	1	0	0	0	20	0	1	0	1	1	1	1	2	0
1267	0	5	1	1	2	1	1	1	0	1	1	1	1	1	0	0	1	20	0	1	1	1	1	1	1	2	1
1272	0	4	1	1	2	0	1	1	0	1	2	1	1	1	0	0	0	20	0	1	0	1	1	1	1	2	0
1274	0	1	1	1	2	0	1	1	0	1	2	1	1	1	0	0	0	20	0	1	0	1	1	1	1	2	0
1275	0	5	1	1	2	1	1	1	0	1	1	1	1	1	0	0	1	20	0	1	1	1	1	1	1	2	1
1277	1	1	1	1	4	0	2	1	1	1	1	1	1	1	0	0	1	14	0	1	1	2	1	1	1	2	1
1278	0	5	1	1	2	1	1	1	0	1	1	1	1	1	0	0	1	20	0	1	1	1	1	1	1	2	1
1281	0	4	1	1	2	0	1	1	0	1	2	1	1	1	0	0	0	20	0	1	0	1	1	1	1	2	0
1284	0	1	1	1	2	1	1	1	0	1	1	1	1	1	0	1	0	20	0	1	1	1	1	1	1	2	1
1285	1	1	1	1	4	1	1	1	1	1	0	1	1	1	0	0	1	20	0	1	1	1	1	1	1	2	1
1286	0	4	1	1	2	0	1	1	0	1	2	1	1	1	0	0	0	20	0	1	0	1	1	1	1	2	0
1287	0	1	1	1	3	0	1	1	0	0	2	1	1	1	0	0	0	20	0	1	0	1	1	1	1	2	0
1290	0	5	1	1	2	1	1	1	0	1	1	1	1	1	0	0	1	20	0	1	1	1	1	1	1	2	1
1292	1	4	1	1	2	0	1	1	0	1	2	1	1	1	0	0	1	14	0	1	1	1	1	1	1	2	1
1293	0	5	1	1	2	1	1	1	0	1	1	1	1	1	0	0	1	20	0	1	1	1	1	1	1	2	1
1294	0	1	1	1	1	0	2	1	1	1	2	1	1	1	0	0	1	14	0	1	1	2	1	1	1	2	1
1298	0	5	1	1	4	0	1	1	0	0	2	1	1	1	0	0	0	20	0	1	0	1	1	1	1	2	0
1299	1	1	1	1	1	0	1	1	0	1	2	1	1	1	0	1	0	20	0	1	1	1	1	1	1	2	1
1301	0	5	1	1	2	1	1	1	0	1	1	1	1	1	0	0	1	20	0	1	1	1	1	1	1	2	1
1302	0	4	1	1	0	0	1	1	0	1	2	1	2	1	0	0	1	20	0	1	1	1	1	1	2	3	1
1303	0	5	1	1	2	1	1	1	0	1	1	1	1	1	0	0	1	20	0	1	1	1	1	1	1	2	1
1304	0	4	1	1	2	0	1	1	0	1	2	1	1	1	0	0	0	20	0	1	0	1	1	1	1	2	0
1305	1	3	1	1	0	1	2	3	1	0	2	1	1	1	0	1	0	20	0	1	1	2	3	1	1	2	1
1306	1	1	1	1	1	0	1	1	0	1	2	1	1	1	0	1	0	20	0	1	1	1	1	1	1	2	1
1309	0	5	1	1	2	1	1	1	0	1	1	1	1	1	0	0	1	20	0	1	1	1	1	1	1	2	1
1310	0	1	1	1	2	0	1	1	0	1	2	1	1	1	0	1	0	20	0	1	1	1	1	1	1	2	1
1313	0	3	1	1	0	0	2	3	0	1	2	2	2	1	0	1	0	20	0	1	1	2	3	2	2	4	1
1314	1	1	1	1	4	1	1	2	1	1	0	1	2	1	0	0	1	20	0	1	1	1	2	1	2	3	1
1316	0	4	1	1	2	0	1	1	0	1	2	1	1	1	0	0	0	20	0	1	0	1	1	1	1	2	0
1318	0	5	1	1	2	1	1	1	1	1	1	1	2	1	0	0	1	16	0	1	1	1	1	1	2	3	1
1319	1	3	1	1	0	1	2	3	1	0	2	1	1	1	0	1	0	20	0	1	1	2	3	1	1	2	1
1321	1	1	1	1	0	1	1	1	1	1	2	1	1	1	0	1	0	20	0	1	1	1	1	1	1	2	1
1322	0	1	1	1	3	1	1	1	0	1	0	1	1	1	0	0	1	20	0	1	1	1	1	1	1	2	1
1324	0	1	1	1	0	1	1	1	0	1	2	1	1	1	0	1	0	20	0	1	1	1	1	1	1	2	1
1326	0	1	1	1	4	1	1	1	1	1	0	1	1	1	0	0	1	20	0	1	1	1	1	1	1	2	1
1327	0	5	1	1	2	1	1	1	1	1	1	1	2	1	0	0	1	16	0	1	1	1	1	1	2	3	1
1328	0	1	1	1	2	0	1	1	0	1	2	1	1	1	0	0	0	20	0	1	0	1	1	1	1	2	0
1329	0	5	1	1	2	1	1	1	1	1	1	1	2	1	0	0	1	16	0	1	1	1	1	1	2	3	1
1332	1	1	1	1	4	1	1	1	1	1	0	1	1	1	0	0	1	20	0	1	1	1	1	1	1	2	1
1333	0	1	1	1	4	1	1	1	1	1	0	1	1	1	0	0	1	20	0	1	1	1	1	1	1	2	1
1336	1	2	1	1	0	1	2	1	1	0	2	2	2	1	0	1	0	20	0	1	1	2	1	2	2	4	1
1341	0	5	1	1	4	0	1	1	0	0	2	1	1	1	0	0	0	20	0	1	0	1	1	1	1	2	0
1342	0	1	1	1	2	0	1	1	0	1	2	1	1	1	0	0	0	20	0	1	0	1	1	1	1	2	0
1343	0	4	1	1	2	0	1	1	0	1	2	1	1	1	0	0	0	20	0	1	0	1	1	1	1	2	0
1344	0	5	1	1	3	0	1	1	0	0	2	1	1	1	0	0	0	20	0	1	0	1	1	1	1	2	0
1345	0	5	1	1	2	1	1	1	1	1	1	1	2	1	0	0	1	16	0	1	1	1	1	1	2	3	1
1349	0	5	1	1	4	0	1	1	0	0	2	1	1	1	0	0	0	20	0	1	0	1	1	1	1	2	0
1352	0	5	1	1	2	1	1	1	0	1	1	1	1	1	0	0	1	20	0	1	1	1	1	1	1	2	1
1353	0	5	1	1	4	0	1	1	0	0	2	1	1	1	0	0	0	20	0	1	0	1	1	1	1	2	0
1356	0	3	1	1	0	0	2	2	0	0	2	2	2	1	0	1	0	20	0	1	1	2	2	2	2	4	1
1357	0	4	1	1	2	0	1	1	0	1	2	1	1	1	0	0	0	20	0	1	0	1	1	1	1	2	0
1358	0	4	1	1	2	0	1	1	0	1	2	1	1	1	0	0	0	20	0	1	0	1	1	1	1	2	0
1360	0	3	1	1	0	0	2	2	0	0	2	2	2	1	0	1	0	20	0	1	1	2	2	2	2	4	1
1361	0	4	1	1	2	0	1	1	0	1	2	1	1	1	0	0	0	20	0	1	0	1	1	1	1	2	0
1362	0	4	1	1	2	0	1	1	0	1	2	1	1	1	0	0	0	20	0	1	0	1	1	1	1	2	0
1366	0	5	1	1	4	0	1	1	0	1	2	1	1	1	0	0	0	20	0	1	0	1	1	1	1	2	0
1367	0	5	1	1	4	0	1	1	0	0	2	1	1	1	0	0	0	20	0	1	0	1	1	1	1	2	0
1368	0	4	1	1	2	0	1	1	0	1	2	1	1	1	0	0	0	20	0	1	0	1	1	1	1	2	0
1369	0	4	1	1	2	0	1	2	0	1	2	3	2	1	0	0	0	20	0	1	0	1	2	3	2	5	0
1372	1	3	1	1	0	1	2	3	1	0	2	2	2	1	0	1	0	20	0	1	1	2	3	2	2	4	1
1373	0	5	1	1	4	0	1	1	0	0	2	1	1	1	0	0	0	20	0	1	0	1	1	1	1	2	0
1377	0	5	1	1	2	1	1	1	0	1	1	1	1	1	0	0	1	20	0	1	1	1	1	1	1	2	1
1379	0	3	1	1	0	0	2	2	0	0	2	2	2	1	0	1	0	20	0	1	1	2	2	2	2	4	1
1401	1	3	1	1	1	0	1	2	0	1	2	1	2	2	0	1	0	20	0	1	1	1	2	1	2	3	1
1402	1	3	1	1	1	0	1	2	0	1	2	1	2	2	0	1	0	20	0	1	1	1	2	1	2	3	1
1403	1	3	1	1	1	0	1	2	0	1	2	1	2	2	0	1	0	20	0	1	1	1	2	1	2	3	1
1404	0	3	1	1	2	0	1	1	0	0	2	1	1	2	0	0	0	20	0	1	0	1	1	1	1	2	0
1405	0	3	1	1	0	1	1	2	0	1	1	3	2	2	0	0	1	20	0	1	1	1	2	3	2	5	1
1406	0	2	1	1	2	0	2	1	0	0	2	2	2	2	0	0	0	20	0	1	0	2	1	2	2	4	0
1407	0	5	1	1	4	0	1	1	1	1	1	1	1	2	0	0	1	20	0	1	1	1	1	1	1	2	1
1408	0	2	1	1	3	0	1	2	0	0	2	1	2	2	0	1	0	20	0	1	1	1	2	1	2	3	1
1410	0	3	1	1	2	0	1	1	0	0	2	1	1	2	0	0	0	20	0	1	0	1	1	1	1	2	0
1411	1	3	1	1	1	0	1	2	0	1	2	3	2	2	0	1	0	20	0	1	1	1	2	3	2	5	1
1412	0	4	1	1	2	0	1	1	1	1	2	1	1	2	0	0	1	12	0	1	1	1	1	1	1	2	1
1414	1	1	1	1	4	1	1	2	1	1	0	1	2	2	0	0	1	20	0	1	1	1	2	1	2	3	1
1416	0	3	1	1	0	1	1	2	0	1	2	1	2	2	0	1	0	20	0	1	1	1	2	1	2	3	1
1417	1	3	1	1	1	0	1	2	0	1	2	1	2	2	0	1	0	20	0	1	1	1	2	1	2	3	1
1419	0	4	1	1	0	1	1	1	0	1	0	1	1	2	0	0	1	20	0	1	1	1	1	1	1	2	1
1422	0	4	1	1	0	0	1	1	0	1	2	1	2	3	0	0	1	18	0	1	1	1	1	1	2	3	1
1427	0	5	1	1	4	0	1	2	1	1	1	1	2	3	0	0	1	20	0	1	1	1	2	1	2	3	1
1431	1	4	1	1	0	1	1	1	1	1	2	1	1	3	0	1	0	20	0	1	1	1	1	1	1	2	1
1435	0	1	1	1	3	0	1	1	1	1	2	1	1	3	0	0	1	20	4	1	1	1	1	1	1	2	5
1438	0	3	1	1	0	0	2	2	0	0	2	1	2	3	0	1	0	20	0	1	1	2	2	1	2	3	1
1440	1	1	1	1	4	1	1	1	1	1	0	1	1	3	0	1	0	20	0	1	1	1	1	1	1	2	1
1445	0	4	1	1	0	0	1	1	0	1	2	1	1	3	0	1	0	20	0	1	1	1	1	1	1	2	1
1446	0	3	1	1	0	0	2	2	0	0	2	1	1	3	0	1	0	20	0	1	1	2	2	1	1	2	1
1447	0	3	1	1	0	0	2	2	0	0	2	1	1	3	0	1	0	20	0	1	1	2	2	1	1	2	1
1450	0	3	1	1	0	0	2	2	0	0	2	1	1	3	0	1	0	20	0	1	1	2	2	1	1	2	1
1451	0	4	1	1	0	1	1	1	0	1	0	1	1	3	0	0	1	20	0	1	1	1	1	1	1	2	1
1458	0	3	1	1	0	0	2	2	0	0	2	1	2	3	0	1	0	20	0	1	1	2	2	1	2	3	1
1462	0	4	1	1	0	0	1	1	0	1	2	1	2	4	0	0	1	20	0	1	1	1	1	1	2	3	1
1463	0	5	1	1	4	0	1	2	1	1	1	1	2	4	0	0	1	20	0	1	1	1	2	1	2	3	1
1464	0	1	1	1	0	0	1	1	0	0	2	1	2	4	0	1	0	20	0	1	1	1	1	1	2	3	1
1465	1	4	1	1	2	0	1	1	0	1	2	1	1	4	0	0	1	14	0	1	1	1	1	1	1	2	1
1466	1	4	1	1	2	0	1	1	0	1	2	1	1	4	0	0	1	14	0	1	1	1	1	1	1	2	1
1467	1	4	1	1	2	0	1	1	0	1	2	1	1	4	0	0	1	14	0	1	1	1	1	1	1	2	1
1468	0	4	1	1	0	1	1	1	0	1	0	1	1	4	0	0	1	20	0	1	1	1	1	1	1	2	1
1469	1	2	1	1	1	0	2	1	0	1	2	2	2	4	0	1	0	20	0	1	1	2	1	2	2	4	1
1471	1	4	1	1	2	0	1	1	0	1	2	1	1	4	0	0	1	14	0	1	1	1	1	1	1	2	1
1472	1	2	1	1	1	0	2	1	0	1	2	2	2	4	0	1	0	20	0	1	1	2	1	2	2	4	1
1473	1	2	1	1	1	0	2	1	0	1	2	2	2	4	0	1	0	20	0	1	1	2	1	2	2	4	1
1474	0	5	1	1	4	0	1	1	1	1	1	1	1	4	0	0	1	20	0	1	1	1	1	1	1	2	1
1475	1	4	1	1	2	0	1	1	0	1	2	1	1	4	0	0	1	14	0	1	1	1	1	1	1	2	1
1476	1	4	1	1	2	0	1	1	0	1	2	1	1	4	0	0	1	14	0	1	1	1	1	1	1	2	1
1477	1	4	1	1	2	0	1	1	0	1	2	1	1	4	0	0	1	14	0	1	1	1	1	1	1	2	1
1478	0	4	1	1	0	0	1	1	0	1	2	1	1	4	0	1	0	20	0	1	1	1	1	1	1	2	1
5967	0	5	1	1	2	1	1	1	0	1	1	1	1	1	0	0	1	20	0	0	1	1	1	1	1	2	1
5968	1	1	1	1	3	0	1	1	0	0	2	1	1	1	0	0	0	20	0	0	0	1	1	1	1	2	0
5970	0	4	1	1	2	0	1	1	0	1	2	1	1	1	0	0	0	20	0	0	0	1	1	1	1	2	0
5972	0	1	1	1	2	0	1	1	0	1	2	1	1	1	0	1	0	20	0	0	1	1	1	1	1	2	1
5974	0	5	1	1	4	0	1	1	0	1	2	1	1	1	0	0	0	20	0	0	0	1	1	1	1	2	0
5980	1	1	1	1	0	1	1	1	1	1	2	1	1	1	0	1	0	20	0	0	1	1	1	1	1	2	1
5981	0	5	1	1	2	1	1	1	0	1	1	1	1	1	0	0	1	20	0	0	1	1	1	1	1	2	1
5982	0	5	1	1	2	1	1	1	0	1	1	1	1	1	0	0	1	20	0	0	1	1	1	1	1	2	1
5983	1	1	1	1	1	0	1	1	0	1	2	1	1	1	0	1	0	20	0	0	1	1	1	1	1	2	1
5988	0	5	1	1	2	1	1	1	1	1	1	1	2	1	0	0	1	16	0	0	1	1	1	1	2	3	1
5989	0	4	1	1	0	1	2	1	0	1	0	1	1	1	0	0	1	20	0	0	1	2	1	1	1	2	1
5990	1	3	1	1	0	1	2	3	1	0	2	3	3	1	0	1	0	20	0	0	1	2	3	3	3	6	1
5993	1	3	1	1	0	1	2	3	1	0	2	2	2	1	0	1	0	20	0	0	1	2	3	2	2	4	1
5997	0	5	1	1	2	1	1	1	1	1	1	1	2	1	0	0	1	16	0	0	1	1	1	1	2	3	1
5998	0	5	1	1	2	1	1	1	0	1	1	1	1	1	0	0	1	20	0	0	1	1	1	1	1	2	1
5999	0	4	1	1	2	0	1	1	0	1	2	1	1	1	0	0	0	20	0	0	0	1	1	1	1	2	0
6001	1	1	1	1	0	1	1	1	1	1	2	1	1	1	0	0	0	20	0	0	0	1	1	1	1	2	0
6002	0	5	1	1	2	1	1	1	0	1	1	1	1	1	0	0	1	20	0	0	1	1	1	1	1	2	1
6004	0	4	1	1	2	0	1	1	0	1	2	1	1	1	0	0	0	20	0	0	0	1	1	1	1	2	0
6011	0	5	1	1	2	1	1	1	1	1	1	1	2	1	0	0	1	16	0	0	1	1	1	1	2	3	1
6013	0	5	1	1	2	1	1	1	0	1	1	1	1	1	0	0	1	20	0	0	1	1	1	1	1	2	1
6015	0	4	1	1	2	0	1	1	0	1	2	1	1	1	0	0	0	20	0	0	0	1	1	1	1	2	0
6020	0	5	1	1	2	1	1	1	1	1	1	1	2	1	0	0	1	16	0	0	1	1	1	1	2	3	1
6023	1	1	1	1	4	1	1	2	1	1	0	1	2	1	0	0	1	20	0	0	1	1	2	1	2	3	1
6027	0	5	1	1	4	0	1	1	0	0	2	1	1	1	0	0	0	20	0	0	0	1	1	1	1	2	0
6028	0	4	1	1	2	1	2	1	0	1	1	1	1	1	0	1	0	20	0	0	1	2	1	1	1	2	1
6029	0	5	1	1	2	1	1	1	0	1	1	1	1	1	0	0	1	20	0	0	1	1	1	1	1	2	1
6031	0	4	1	1	0	1	1	1	0	1	0	1	1	1	0	0	1	20	0	0	1	1	1	1	1	2	1
6032	0	4	1	1	2	0	1	1	0	1	2	1	1	1	0	0	0	20	0	0	0	1	1	1	1	2	0
6033	0	5	1	1	2	1	1	1	1	1	1	1	2	1	0	0	1	16	0	0	1	1	1	1	2	3	1
6035	0	4	1	1	2	0	1	1	0	1	2	1	1	1	0	0	0	20	0	0	0	1	1	1	1	2	0
6037	0	1	1	1	0	1	1	1	0	1	2	1	1	1	0	1	0	20	0	0	1	1	1	1	1	2	1
6038	0	5	1	1	4	0	1	1	1	1	1	1	1	1	0	0	1		0	0	1	1	1	1	1	2	1
6039	1	1	1	1	1	0	1	1	0	1	2	1	1	1	0	1	0	20	0	0	1	1	1	1	1	2	1
6043	1	1	1	1	4	0	2	1	1	1	1	1	1	1	0	0	1	14	0	0	1	2	1	1	1	2	1
6044	0	1	1	1	2	0	1	1	0	0	2	1	1	1	0	0	0	20	0	0	0	1	1	1	1	2	0
6045	0	4	1	1	2	0	1	1	0	1	2	1	1	1	0	0	0	20	0	0	0	1	1	1	1	2	0
6049	1	1	1	1	1	0	1	1	0	1	2	1	1	1	0	1	0	20	0	0	1	1	1	1	1	2	1
6051	0	5	1	1	2	1	1	1	1	1	1	1	2	1	0	0	1	16	0	0	1	1	1	1	2	3	1
6052	0	5	1	1	2	1	1	1	0	1	1	1	1	1	0	0	1	20	0	0	1	1	1	1	1	2	1
6053	0	5	1	1	3	0	1	1	0	0	2	1	1	1	0	0	0	20	0	0	0	1	1	1	1	2	0
6057	0	5	1	1	2	1	1	1	0	1	1	1	1	1	0	0	1	16	0	0	1	1	1	1	1	2	1
6058	1	1	1	1	1	0	1	1	0	1	2	1	1	1	0	1	0	20	0	0	1	1	1	1	1	2	1
6067	0	5	1	1	4	0	1	1	0	0	2	1	1	1	0	0	0	20	0	0	0	1	1	1	1	2	0
6068	0	4	1	1	2	0	1	1	0	1	2	1	1	1	0	0	0	20	0	0	0	1	1	1	1	2	0
6071	0	5	1	1	2	1	1	1	0	1	1	1	1	1	0	0	1	20	0	0	1	1	1	1	1	2	1
6072	0	4	1	1	0	1	2	1	0	1	0	1	1	1	0	0	1	20	0	0	1	2	1	1	1	2	1
6075	0	1	1	1	0	1	1	1	0	1	2	1	1	1	0	1	0	20	0	0	1	1	1	1	1	2	1
6077	0	5	1	1	2	1	1	1	0	1	1	1	1	1	0	0	1	20	0	0	1	1	1	1	1	2	1
6080	1	1	1	1	0	1	1	1	1	0	2	1	1	1	0	1	0	20	0	0	1	1	1	1	1	2	1
6081	0	4	1	1	2	0	1	1	0	1	2	1	1	1	0	0	0	20	0	0	0	1	1	1	1	2	0
6082	0	5	1	1	2	1	1	1	0	1	1	1	1	1	0	0	1	20	0	0	1	1	1	1	1	2	1
6083	0	4	1	1	2	0	1	1	0	1	2	1	1	1	0	0	0	20	0	0	0	1	1	1	1	2	0
6085	0	1	1	1	3	1	1	1	0	1	0	1	1	1	0	0	1	20	0	0	1	1	1	1	1	2	1
6101	0	4	1	1	2	0	1	1	0	1	2	1	1	1	0	0	0	20	0	0	0	1	1	1	1	2	0
6103	0	4	1	1	3	0	1	1	0	1	1	1	1	1	0	0	1	20	0	0	1	1	1	1	1	2	1
6106	0	1	1	1	4	1	1	1	1	1	0	1	1	1	0	0	1	20	0	0	1	1	1	1	1	2	1
6111	0	3	1	1	0	0	2	3	0	1	2	2	2	1	0	1	0	20	0	0	1	2	3	2	2	4	1
6112	0	4	1	1	2	0	1	1	0	1	2	1	1	1	0	0	0	20	0	0	0	1	1	1	1	2	0
6115	0	1	1	1	1	1	1	1	0	1	0	1	1	1	0	0	1	20	0	0	1	1	1	1	1	2	1
6116	1	1	1	1	4	1	1	2	1	1	0	1	2	1	0	0	1	20	0	0	1	1	2	1	2	3	1
6120	0	5	1	1	2	1	1	1	1	1	1	1	2	1	0	0	1	16	0	0	1	1	1	1	2	3	1
6121	1	3	1	1	0	1	2	3	1	0	2	3	3	1	0	1	0	20	0	0	1	2	3	3	3	6	1
6126	0	5	1	1	4	0	1	1	0	1	2	1	1	1	0	0	0	20	0	0	0	1	1	1	1	2	0
6132	1	1	1	1	0	1	1	1	1	0	2	1	1	1	0	1	0	20	0	0	1	1	1	1	1	2	1
6134	1	1	1	1	4	1	1	2	1	1	0	1	2	1	0	0	1	20	0	0	1	1	2	1	2	3	1
6135	0	4	1	1	2	0	1	1	0	1	2	1	1	1	0	0	0	20	0	0	0	1	1	1	1	2	0
6136	0	5	1	1	4	0	1	1	0	0	2	1	1	1	0	0	0	20	0	0	0	1	1	1	1	2	0
6138	1	1	1	1	3	0	1	1	0	0	2	1	1	1	0	0	0	20	0	0	0	1	1	1	1	2	0
6139	0	5	1	1	2	1	1	1	0	1	1	1	1	1	0	0	1	20	1	0	1	1	1	1	1	2	2
6140	0	5	1	1	3	0	1	1	0	0	2	1	1	1	0	0	0	20	0	0	0	1	1	1	1	2	0
6145	1	1	1	1	0	1	1	1	1	1	2	1	1	1	0	1	0	20	0	0	1	1	1	1	1	2	1
6147	0	4	1	1	0	1	2	1	0	1	0	1	1	1	0	0	1	20	0	0	1	2	1	1	1	2	1
6153	0	5	1	1	3	0	1	1	0	0	2	1	1	1	0	0	0	20	0	0	0	1	1	1	1	2	0
6154	0	1	1	1	2	0	1	1	0	1	2	1	1	1	0	0	0	20	0	0	0	1	1	1	1	2	0
6156	1	1	1	1	3	0	1	1	0	0	2	1	1	1	0	0	0	20	0	0	0	1	1	1	1	2	0
6158	0	5	1	1	2	1	1	1	0	1	1	1	1	1	0	0	1	20	0	0	1	1	1	1	1	2	1
6159	1	1	1	1	0	1	1	1	1	1	2	1	1	1	0	1	0	20	0	0	1	1	1	1	1	2	1
6163	1	1	1	1	3	0	1	1	0	0	2	1	1	1	0	0	0	20	0	0	0	1	1	1	1	2	0
6165	0	3	1	1	2	0	1	3	0	0	2	1	1	1	0	0	0	20	0	0	0	1	3	1	1	2	0
6166	0	5	1	1	2	1	1	1	0	1	1	1	1	1	0	0	1	20	0	0	1	1	1	1	1	2	1
6167	0	1	1	1	2	1	1	1	0	1	1	1	1	1	0	1	0	20	0	0	1	1	1	1	1	2	1
6168	0	1	1	1	2	0	1	1	0	1	2	1	1	1	0	0	0	20	0	0	0	1	1	1	1	2	0
6172	0	5	1	1	4	0	1	1	0	0	2	1	1	1	0	0	0	20	0	0	0	1	1	1	1	2	0
6174	0	1	1	1	3	1	1	1	0	1	0	1	1	1	0	0	1	20	0	0	1	1	1	1	1	2	1
6180	0	5	1	1	2	1	1	1	0	1	1	1	1	1	0	0	1	20	0	0	1	1	1	1	1	2	1
6182	0	5	1	1	2	1	1	1	0	1	1	1	1	1	0	0	1	20	0	0	1	1	1	1	1	2	1
6185	0	4	1	1	2	0	1	1	0	1	2	1	1	1	0	0	0	20	0	0	0	1	1	1	1	2	0
6188	0	1	1	1	2	0	1	1	0	1	2	1	1	1	0	0	0	20	0	0	0	1	1	1	1	2	0
6189	0	4	1	1	0	1	1	1	0	1	0	1	1	1	0	0	1	20	0	0	1	1	1	1	1	2	1
6191	0	5	1	1	4	0	1	1	1	1	1	1	1	1	0	0	1		0	0	1	1	1	1	1	2	1
6193	1	1	1	1	4	0	2	1	1	1	1	1	1	1	0	0	1	14	0	0	1	2	1	1	1	2	1
6196	0	4	1	1	2	0	1	1	0	1	2	1	1	1	0	0	0	20	0	0	0	1	1	1	1	2	0
6198	0	5	1	1	2	1	1	1	0	1	1	1	1	1	0	0	1	20	0	0	1	1	1	1	1	2	1
6200	0	5	1	1	2	1	1	1	0	1	1	1	1	1	0	0	1	20	0	0	1	1	1	1	1	2	1
6203	1	1	1	1	3	0	1	1	0	0	2	1	1	1	0	0	0	20	0	0	0	1	1	1	1	2	0
6207	0	5	1	1	4	0	1	1	0	1	2	1	1	1	0	0	0	20	0	0	0	1	1	1	1	2	0
6208	0	1	1	1	1	1	1	1	0	1	0	1	1	1	0	0	1	20	0	0	1	1	1	1	1	2	1
6209	0	1	1	1	2	0	1	1	0	1	2	1	1	1	0	1	0	20	0	0	1	1	1	1	1	2	1
6211	0	5	1	1	2	1	1	1	0	1	1	1	2	1	0	0	1	16	0	0	1	1	1	1	2	3	1
6212	0	4	1	1	2	0	1	1	0	1	2	1	1	1	0	0	0	20	0	0	0	1	1	1	1	2	0
6214	0	5	1	1	2	1	1	1	1	1	1	1	2	1	0	0	1	16	0	0	1	1	1	1	2	3	1
6217	1	1	1	1	4	0	2	1	1	1	1	1	1	1	0	0	1	14	0	0	1	2	1	1	1	2	1
6221	0	5	1	1	2	1	1	1	0	1	1	1	1	1	0	0	1	20	1	0	1	1	1	1	1	2	2
6222	1	1	1	1	0	1	1	1	1	0	2	1	1	1	0	1	0	20	0	0	1	1	1	1	1	2	1
6223	0	4	1	1	2	0	1	1	0	1	2	1	1	1	0	0	0	20	0	0	0	1	1	1	1	2	0
6227	1	1	1	1	0	1	1	1	1	0	2	1	1	1	0	1	0	20	0	0	1	1	1	1	1	2	1
6230	0	5	1	1	4	0	1	1	0	0	2	1	1	1	0	0	0	20	0	0	0	1	1	1	1	2	0
6231	0	4	1	1	0	1	1	1	0	1	0	1	1	1	0	0	1	20	0	0	1	1	1	1	1	2	1
6237	1	1	1	1	4	1	1	1	1	1	0	1	1	1	0	0	1	20	0	0	1	1	1	1	1	2	1
6239	1	1	1	1	4	1	2	2	1	1	0	1	1	1	0	0	1	20	0	0	1	2	2	1	1	2	1
6240	1	3	1	1	0	1	2	3	1	0	2	1	1	1	0	1	0	20	0	0	1	2	3	1	1	2	1
6243	1	3	1	1	0	1	2	3	1	0	2	3	3	1	0	1	0	20	0	0	1	2	3	3	3	6	1
6246	0	4	1	1	2	0	1	1	0	1	2	1	1	1	0	0	0	20	0	0	0	1	1	1	1	2	0
6247	0	1	1	1	2	0	1	1	0	1	2	1	1	1	0	0	0	20	0	0	0	1	1	1	1	2	0
6251	0	5	1	1	4	0	1	1	0	0	2	1	1	1	0	0	0	20	0	0	0	1	1	1	1	2	0
6256	0	4	1	1	2	0	1	1	0	1	2	1	1	1	0	0	0	20	0	0	0	1	1	1	1	2	0
6257	0	5	1	1	2	1	1	1	0	1	1	1	1	1	0	0	1	20	0	0	1	1	1	1	1	2	1
6262	0	1	1	1	4	1	1	1	1	1	0	1	1	1	0	0	1	20	0	0	1	1	1	1	1	2	1
6263	0	1	1	1	4	1	1	1	1	1	0	1	1	1	0	0	1	20	0	0	1	1	1	1	1	2	1
6264	0	5	1	1	2	1	1	1	0	1	1	1	1	1	0	0	1	20	0	0	1	1	1	1	1	2	1
6269	0	5	1	1	4	0	1	1	0	0	2	1	1	1	0	0	0	20	0	0	0	1	1	1	1	2	0
6271	0	4	1	1	2	0	1	1	0	1	2	1	1	1	0	0	0	20	0	0	0	1	1	1	1	2	0
6274	0	4	1	1	2	1	2	1	0	1	1	1	1	1	0	1	0	20	0	0	1	2	1	1	1	2	1
6276	0	4	1	1	2	0	1	1	0	1	2	1	1	1	0	0	0	19	0	0	0	1	1	1	1	2	0
6282	0	4	1	1	2	0	1	1	0	1	2	1	1	1	0	0	0	20	0	0	0	1	1	1	1	2	0
6283	0	3	1	1	2	0	2	3	0	0	2	1	1	1	0	0	0	20	0	0	0	2	3	1	1	2	0
6284	0	3	1	1	0	0	2	3	0	1	2	2	2	1	0	1	0	20	0	0	1	2	3	2	2	4	1
6285	0	5	1	1	4	0	1	1	0	0	2	1	1	1	0	0	0	20	0	0	0	1	1	1	1	2	0
6289	0	2	1	1	3	0	2	2	0	0	2	1	1	1	0	1	0	20	0	0	1	2	2	1	1	2	1
6292	0	4	1	1	2	0	1	1	0	1	2	1	1	1	0	0	0	20	0	0	0	1	1	1	1	2	0
6297	0	4	1	1	2	0	1	1	0	1	2	1	1	1	0	0	0	20	0	0	0	1	1	1	1	2	0
6298	0	1	1	1	2	0	1	1	0	1	2	1	1	1	0	0	0	20	0	0	0	1	1	1	1	2	0
6304	0	4	1	1	2	0	1	1	0	1	2	1	1	1	0	0	0	20	0	0	0	1	1	1	1	2	0
6305	1	1	1	1	4	0	2	1	1	1	1	1	1	1	0	0	1	14	0	0	1	2	1	1	1	2	1
6307	0	4	1	1	2	0	1	1	0	1	2	1	1	1	0	0	0	20	0	0	0	1	1	1	1	2	0
6310	0	4	1	1	0	1	1	1	0	1	0	1	1	1	0	0	1	20	0	0	1	1	1	1	1	2	1
6313	0	4	1	1	2	1	2	1	0	1	1	1	1	1	0	1	0	20	0	0	1	2	1	1	1	2	1
6315	1	4	1	1	2	0	1	1	0	1	2	1	1	1	0	0	1	14	0	0	1	1	1	1	1	2	1
6318	0	4	1	1	2	0	1	1	0	1	2	1	1	1	0	0	0	20	0	0	0	1	1	1	1	2	0
6324	0	5	1	1	4	0	1	1	0	1	2	1	1	1	0	0	0	20	0	0	0	1	1	1	1	2	0
6327	1	3	1	1	2	0	1	2	0	1	2	2	1	1	0	0	1	16	0	0	1	1	2	2	1	3	1
6329	1	1	1	1	4	1	1	1	1	1	0	1	1	1	0	0	1	20	0	0	1	1	1	1	1	2	1
6331	0	5	1	1	2	1	1	1	0	1	1	1	1	1	0	0	1	20	0	0	1	1	1	1	1	2	1
6332	0	5	1	1	0	1	1	1	0	1	1	1	1	1	0	0	1	20	0	0	1	1	1	1	1	2	1
6334	0	1	1	1	2	0	1	1	0	1	2	1	1	1	0	1	0	20	0	0	1	1	1	1	1	2	1
6340	0	4	1	1	2	0	1	1	0	1	2	1	1	1	0	0	0	20	0	0	0	1	1	1	1	2	0
6344	0	1	1	1	4	1	1	1	1	1	0	1	1	1	0	0	1	20	0	0	1	1	1	1	1	2	1
6346	1	1	1	1	0	1	1	1	1	0	2	1	1	1	0	1	0	20	0	0	1	1	1	1	1	2	1
6347	0	4	1	1	2	0	1	1	0	1	2	1	1	1	0	0	0	20	0	0	0	1	1	1	1	2	0
6348	0	4	1	1	3	0	1	1	0	1	1	1	1	1	0	0	1	20	0	0	1	1	1	1	1	2	1
6350	1	2	1	1	0	1	2	1	1	0	2	2	2	1	0	1	0	20	0	0	1	2	1	2	2	4	1
6352	1	1	1	1	3	0	1	1	0	0	2	1	1	1	0	0	0	20	0	0	0	1	1	1	1	2	0
6353	0	1	1	1	2	1	1	1	0	1	1	1	1	1	0	1	0	20	0	0	1	1	1	1	1	2	1
6358	0	4	1	1	0	0	1	1	0	1	2	1	2	1	0	0	1	20	0	0	1	1	1	1	2	3	1
6363	0	4	1	1	2	0	1	1	0	1	2	1	1	1	0	0	0	20	0	0	0	1	1	1	1	2	0
6365	0	3	1	1	0	0	2	3	0	1	2	2	2	1	0	1	0	20	0	0	1	2	3	2	2	4	1
6366	0	4	1	1	2	0	1	2	0	1	2	3	2	1	0	0	0	20	0	0	0	1	2	3	2	5	0
6368	1	1	1	1	4	1	1	1	1	1	0	1	1	1	0	0	1	20	0	0	1	1	1	1	1	2	1
6370	0	4	1	1	2	0	1	1	0	1	2	1	1	1	0	0	0	20	0	0	0	1	1	1	1	2	0
6373	0	4	1	1	2	0	1	2	0	1	2	3	2	1	0	0	0	20	0	0	0	1	2	3	2	5	0
6374	1	1	1	1	4	1	1	2	1	1	0	1	2	1	0	0	1	20	0	0	1	1	2	1	2	3	1
6377	1	4	1	1	2	0	1	1	0	1	2	1	1	1	0	0	1	14	0	0	1	1	1	1	1	2	1
6378	1	1	1	1	3	0	1	1	0	0	2	1	1	1	0	0	0	20	0	0	0	1	1	1	1	2	0
6380	0	4	1	1	2	0	1	1	0	1	2	1	1	1	0	0	0	20	0	0	0	1	1	1	1	2	0
6518	1	3	1	1	1	0	1	2	0	1	2	3	2	2	0	1	0	20	0	0	1	1	2	3	2	5	1
6521	1	3	1	1	1	0	1	2	0	1	2	1	2	2	0	1	0	20	0	0	1	1	2	1	2	3	1
6522	1	1	1	1	4	1	1	2	1	1	0	1	2	2	0	0	1	20	0	0	1	1	2	1	2	3	1
6523	0	1	1	1	2	1	1	1	0	1	1	1	1	2	0	1	0	20	0	0	1	1	1	1	1	2	1
6524	0	1	1	1	0	0	1	1	0	0	2	1	2	2	0	1	0	20	0	0	1	1	1	1	2	3	1
6526	0	4	1	1	0	0	1	1	0	1	2	1	1	2	0	1	0	20	0	0	1	1	1	1	1	2	1
6527	0	4	1	1	0	0	1	1	0	1	2	1	2	2	0	0	1	20	0	0	1	1	1	1	2	3	1
6528	1	1	1	1	0	1	1	1	1	0	2	1	1	2	0	1	0	20	0	0	1	1	1	1	1	2	1
6530	0	1	1	1	3	0	1	1	1	1	2	1	1	2	0	0	1	19	0	0	1	1	1	1	1	2	1
6531	1	3	1	1	0	1	1	2	1	0	0	1	2	2	0	1	0	20	0	0	1	1	2	1	2	3	1
6532	0	5	1	1	4	0	1	1	1	1	1	1	1	2	0	0	1	20	0	0	1	1	1	1	1	2	1
6535	0	3	1	1	4	1	1	2	1	1	0	3	2	2	0	0	1	20	0	0	1	1	2	3	2	5	1
6539	0	5	1	1	4	0	1	1	1	1	1	1	1	2	0	0	1	20	0	0	1	1	1	1	1	2	1
6540	1	2	1	1	1	0	2	1	0	1	2	2	2	2	0	1	0	20	0	0	1	2	1	2	2	4	1
6543	0	5	1	1	4	0	1	1	1	1	1	1	1	2	0	0	1		0	0	1	1	1	1	1	2	1
6544	0	4	1	1	0	1	1	1	0	1	0	1	1	2	0	0	1	20	0	0	1	1	1	1	1	2	1
6545	0	4	1	1	0	1	1	1	0	1	0	1	1	2	0	0	1	20	0	0	1	1	1	1	1	2	1
6547	0	4	1	1	2	0	1	1	1	1	2	1	1	2	0	0	1	12	0	0	1	1	1	1	1	2	1
6549	0	4	1	1	0	1	1	1	0	1	0	1	1	2	0	0	1	20	0	0	1	1	1	1	1	2	1
6551	0	3	1	1	2	0	1	1	0	0	2	1	1	2	0	0	0	20	0	0	0	1	1	1	1	2	0
6553	1	3	1	1	2	0	1	2	1	1	1	1	2	2	0	0	1	20	0	0	1	1	2	1	2	3	1
6555	0	4	1	1	2	0	1	1	1	1	2	1	1	2	0	0	1	12	0	0	1	1	1	1	1	2	1
6557	1	3	1	1	1	0	1	2	0	1	2	1	2	2	0	1	0	20	0	0	1	1	2	1	2	3	1
6559	0	4	1	1	3	1	2	1	0	1	1	1	1	2	0	1	0	20	0	0	1	2	1	1	1	2	1
6561	0	3	1	1	2	0	1	2	0	1	2	3	2	2	0	1	0	20	0	0	1	1	2	3	2	5	1
6566	0	5	1	1	4	0	1	2	1	1	1	1	2	2	0	0	1	20	0	0	1	1	2	1	2	3	1
6567	0	4	1	1	0	1	1	1	0	1	0	1	1	2	0	0	1	20	0	0	1	1	1	1	1	2	1
6569	1	1	1	1	4	1	1	2	1	1	0	1	2	2	0	0	1	20	0	0	1	1	2	1	2	3	1
6571	0	4	1	1	3	1	2	1	0	1	1	1	1	2	0	1	0	20	0	0	1	2	1	1	1	2	1
6572	1	1	1	1	4	1	1	2	1	1	0	1	2	2	0	0	1	20	0	0	1	1	2	1	2	3	1
6573	1	3	1	1	2	0	1	2	1	1	1	1	2	2	0	0	1	20	0	0	1	1	2	1	2	3	1
6574	0	4	1	1	0	1	1	1	0	1	0	1	1	2	0	0	1	20	0	0	1	1	1	1	1	2	1
6575	0	3	1	1	2	0	1	1	0	0	2	1	1	2	0	0	0	20	0	0	0	1	1	1	1	2	0
6578	0	3	1	1	0	0	1	1	0	1	2	1	1	2	0	1	0	20	0	0	1	1	1	1	1	2	1
6579	1	4	1	1	2	0	1	1	1	1	2	1	1	2	0	0	1	12	0	0	1	1	1	1	1	2	1
6580	1	3	1	1	1	0	1	2	0	1	2	1	2	2	0	1	0	20	0	0	1	1	2	1	2	3	1
6582	1	3	1	1	1	0	1	2	0	1	2	1	2	2	0	1	0	20	0	0	1	1	2	1	2	3	1
6584	0	4	1	1	2	0	1	1	1	1	2	1	1	2	0	0	1	12	0	0	1	1	1	1	1	2	1
6586	0	4	1	1	2	0	1	1	1	1	2	1	1	2	0	0	1	12	0	0	1	1	1	1	1	2	1
6588	1	3	1	1	1	0	1	2	0	1	2	1	2	2	0	1	0	20	0	0	1	1	2	1	2	3	1
6589	0	4	1	1	2	0	1	1	0	1	2	1	1	2	0	0	0	19	0	0	0	1	1	1	1	2	0
6592	1	4	1	1	0	1	1	1	1	1	2	1	1	2	0	1	0	20	0	0	1	1	1	1	1	2	1
6593	1	1	1	1	4	1	1	2	1	1	0	1	2	2	0	0	1	20	0	0	1	1	2	1	2	3	1
6594	0	3	1	1	2	0	1	1	0	0	2	1	1	2	0	0	0	20	0	0	0	1	1	1	1	2	0
6595	1	1	1	1	0	1	1	1	1	1	2	1	1	2	0	1	0	20	0	0	1	1	1	1	1	2	1
6597	0	4	1	1	2	0	1	1	1	1	2	1	1	2	0	0	1	12	0	0	1	1	1	1	1	2	1
6599	0	4	1	1	2	0	1	1	0	1	2	1	1	2	0	0	0	20	0	0	0	1	1	1	1	2	0
6601	0	2	1	1	2	0	1	2	0	0	2	1	2	2	0	1	0	20	0	0	1	1	2	1	2	3	1
6602	0	5	1	1	4	0	1	1	1	1	1	1	1	2	0	0	1	20	0	0	1	1	1	1	1	2	1
6603	0	3	1	1	0	1	1	2	0	1	2	1	2	2	0	1	0	20	0	0	1	1	2	1	2	3	1
6605	0	4	1	1	2	0	1	1	1	1	2	1	1	2	0	0	1	12	0	0	1	1	1	1	1	2	1
6607	0	5	1	1	4	0	1	1	1	1	1	1	1	2	0	0	1	20	0	0	1	1	1	1	1	2	1
6608	1	1	1	1	4	1	1	2	1	1	0	1	2	2	0	0	1	20	0	0	1	1	2	1	2	3	1
6609	1	1	1	1	4	1	1	2	1	1	0	1	2	2	0	0	1	20	0	0	1	1	2	1	2	3	1
6611	1	3	1	1	1	0	1	2	0	1	2	3	2	2	0	1	0	20	0	0	1	1	2	3	2	5	1
6612	0	4	1	1	0	0	1	1	0	1	2	1	1	2	0	1	0	20	0	0	1	1	1	1	1	2	1
6613	0	4	1	1	2	0	1	1	1	1	2	1	1	2	0	0	1	12	0	0	1	1	1	1	1	2	1
6614	0	3	1	1	0	1	1	2	0	1	2	1	2	2	0	1	0	20	0	0	1	1	2	1	2	3	1
6615	1	1	1	1	4	1	1	2	1	1	0	1	2	2	0	0	1	20	0	0	1	1	2	1	2	3	1
6616	1	4	1	1	0	1	1	1	1	1	1	1	1	2	0	1	0	20	0	0	1	1	1	1	1	2	1
6617	0	4	1	1	2	0	1	1	0	1	2	1	1	2	0	0	0	18	0	0	0	1	1	1	1	2	0
6618	0	4	1	1	3	1	2	1	0	1	1	1	1	2	0	1	0	20	0	0	1	2	1	1	1	2	1
6621	0	4	1	1	0	0	1	1	0	1	2	1	2	2	0	0	1	20	0	0	1	1	1	1	2	3	1
6623	1	3	1	1	4	0	1	2	1	1	1	2	2	2	0	0	1	20	0	0	1	1	2	2	2	4	1
6625	0	4	1	1	2	0	1	1	0	1	2	1	1	2	0	0	0	20	0	0	0	1	1	1	1	2	0
6626	0	4	1	1	0	0	1	1	0	1	2	1	1	2	0	0	1	19	1	0	1	1	1	1	1	2	2
6627	1	1	1	1	0	1	1	1	1	1	2	1	1	2	0	1	0	20	0	0	1	1	1	1	1	2	1
6628	0	3	1	1	2	0	1	1	0	0	2	1	1	2	0	0	0	20	0	0	0	1	1	1	1	2	0
6629	0	3	1	1	0	1	1	2	0	1	1	3	2	2	0	0	1	20	0	0	1	1	2	3	2	5	1
6630	1	3	1	1	1	0	1	2	0	1	2	1	2	2	0	1	0	20	0	0	1	1	2	1	2	3	1
6631	1	3	1	1	1	0	1	2	0	1	2	1	2	2	0	1	0	20	0	0	1	1	2	1	2	3	1
6633	0	3	1	1	4	1	1	2	1	1	0	3	2	2	0	0	1	20	0	0	1	1	2	3	2	5	1
6634	0	3	1	1	0	1	1	2	0	1	2	1	2	2	0	1	0	20	0	0	1	1	2	1	2	3	1
6635	0	3	1	1	3	0	1	2	0	1	1	1	2	2	0	0	1	20	0	0	1	1	2	1	2	3	1
6636	0	4	1	1	0	1	1	1	0	1	0	1	1	2	0	0	1	20	0	0	1	1	1	1	1	2	1
6639	0	1	1	1	2	1	1	1	0	1	1	1	1	2	0	1	0	20	0	0	1	1	1	1	1	2	1
6640	0	1	1	1	2	1	1	1	0	1	1	1	1	2	0	1	0	20	0	0	1	1	1	1	1	2	1
6641	0	4	1	1	2	0	1	1	0	1	2	1	1	2	0	0	0	19	0	0	0	1	1	1	1	2	0
6642	0	4	1	1	0	1	1	1	0	1	0	1	1	2	0	0	1	20	0	0	1	1	1	1	1	2	1
6643	0	1	1	1	3	0	1	1	1	1	2	1	1	2	0	0	1	19	0	0	1	1	1	1	1	2	1
6646	0	4	1	1	0	1	1	1	0	1	0	1	1	2	0	0	1	20	0	0	1	1	1	1	1	2	1
6649	1	3	1	1	1	0	1	2	0	1	2	1	2	2	0	1	0	20	0	0	1	1	2	1	2	3	1
6654	0	1	1	1	0	0	1	1	0	0	2	1	2	2	0	1	0	20	0	0	1	1	1	1	2	3	1
6656	0	4	1	1	3	1	2	1	0	1	1	1	1	2	0	1	0	20	0	0	1	2	1	1	1	2	1
6657	1	4	1	1	0	1	1	1	1	1	2	1	1	2	0	1	0	20	0	0	1	1	1	1	1	2	1
6658	0	4	1	1	0	1	1	1	0	1	0	1	1	2	0	0	1	20	0	0	1	1	1	1	1	2	1
6659	1	3	1	1	1	0	1	2	0	1	2	1	2	2	0	1	0	20	0	0	1	1	2	1	2	3	1
6660	1	4	1	1	2	0	1	1	1	1	2	1	1	2	0	0	1	12	0	0	1	1	1	1	1	2	1
6661	1	3	1	1	1	0	1	2	0	1	2	1	2	2	0	1	0	20	0	0	1	1	2	1	2	3	1
6663	1	1	1	1	4	1	1	2	1	1	0	1	2	2	0	0	1	20	0	0	1	1	2	1	2	3	1
6664	1	1	1	1	4	1	1	2	1	1	0	1	2	2	0	0	1	20	0	0	1	1	2	1	2	3	1
6665	0	2	1	1	3	0	1	2	0	0	2	1	2	2	0	1	0	20	0	0	1	1	2	1	2	3	1
6666	1	4	1	1	0	1	1	1	1	1	1	1	1	2	0	1	0	20	0	0	1	1	1	1	1	2	1
6670	1	1	1	1	4	1	2	1	1	1	0	2	2	2	0	0	1	20	0	0	1	2	1	2	2	4	1
6671	0	3	1	1	0	1	1	2	0	1	1	3	2	2	0	0	1	20	0	0	1	1	2	3	2	5	1
6672	1	4	1	1	0	1	1	1	1	1	2	1	1	2	0	1	0	20	0	0	1	1	1	1	1	2	1
6673	0	4	1	1	0	1	2	1	0	1	0	1	1	2	0	0	1	20	0	0	1	2	1	1	1	2	1
6674	1	3	1	1	1	0	1	2	0	1	2	1	2	2	0	1	0	20	0	0	1	1	2	1	2	3	1
6675	0	4	1	1	0	1	1	1	0	1	0	1	1	2	0	0	1	20	0	0	1	1	1	1	1	2	1
6676	0	3	1	1	0	1	1	2	0	1	1	3	2	2	0	0	1	20	0	0	1	1	2	3	2	5	1
6677	0	2	1	1	3	0	1	2	0	0	2	1	2	2	0	1	0	20	0	0	1	1	2	1	2	3	1
6679	0	4	1	1	2	0	1	1	0	1	2	1	1	2	0	0	0	20	0	0	0	1	1	1	1	2	0
6680	1	3	1	1	1	0	1	2	0	1	2	1	2	2	0	1	0	20	0	0	1	1	2	1	2	3	1
6681	0	2	1	1	2	0	2	1	0	0	2	2	2	2	0	0	0	20	0	0	0	2	1	2	2	4	0
6682	0	4	1	1	2	1	2	1	0	1	1	1	1	2	0	1	0	20	0	0	1	2	1	1	1	2	1
6685	0	3	1	1	2	1	1	2	0	0	1	1	2	2	0	1	0	20	0	0	1	1	2	1	2	3	1
6686	1	1	1	1	4	1	2	1	1	1	0	2	2	2	0	0	1	20	0	0	1	2	1	2	2	4	1
6688	1	3	1	1	1	0	1	2	0	1	2	1	2	2	0	1	0	20	0	0	1	1	2	1	2	3	1
6689	0	3	1	1	2	0	1	1	0	0	2	1	1	2	0	0	0	20	0	0	0	1	1	1	1	2	0
6690	0	1	1	1	0	0	1	1	0	0	2	1	2	2	0	1	0	20	0	0	1	1	1	1	2	3	1
6691	0	4	1	1	0	0	1	1	0	1	2	1	1	2	0	0	1	20	0	0	1	1	1	1	1	2	1
6692	1	3	1	1	2	0	1	2	0	1	2	2	1	2	0	0	1	16	0	0	1	1	2	2	1	3	1
6694	0	4	1	1	0	0	1	1	0	1	2	1	1	2	0	0	1	20	0	0	1	1	1	1	1	2	1
6696	0	4	1	1	3	0	1	1	0	1	1	1	1	2	0	0	1	20	0	0	1	1	1	1	1	2	1
6698	0	2	1	1	3	0	1	2	0	0	2	1	2	2	0	1	0	20	0	0	1	1	2	1	2	3	1
6740	0	1	1	1	2	1	1	1	0	1	1	1	1	3	0	1	0	20	0	0	1	1	1	1	1	2	1
6741	0	3	1	1	0	0	2	2	0	0	2	1	2	3	0	1	0	20	0	0	1	2	2	1	2	3	1
6743	0	5	1	1	4	0	1	1	1	1	1	1	1	3	0	0	1		0	0	1	1	1	1	1	2	1
6744	1	1	1	1	4	0	2	1	1	1	1	1	1	3	0	0	1	14	0	0	1	2	1	1	1	2	1
6745	0	3	1	1	0	0	2	2	0	0	2	1	1	3	0	1	0	20	0	0	1	2	2	1	1	2	1
6748	0	5	1	1	4	0	1	1	1	1	1	1	1	3	0	0	1	20	0	0	1	1	1	1	1	2	1
6749	1	3	1	1	2	0	1	2	1	1	1	1	2	3	0	0	1	20	0	0	1	1	2	1	2	3	1
6750	0	3	1	1	0	0	2	2	0	0	2	1	1	3	0	1	0	20	0	0	1	2	2	1	1	2	1
6753	1	1	1	1	4	1	1	2	1	1	0	1	2	3	0	0	1	20	0	0	1	1	2	1	2	3	1
6759	0	3	1	1	0	0	2	2	0	0	2	1	2	3	0	1	0	20	0	0	1	2	2	1	2	3	1
6761	0	4	1	1	2	0	1	1	0	0	2	1	1	3	0	0	0	20	0	0	0	1	1	1	1	2	0
6762	0	1	1	1	2	1	1	1	0	1	1	1	1	3	0	1	0	20	0	0	1	1	1	1	1	2	1
6763	0	3	1	1	0	0	2	2	0	0	2	1	2	3	0	1	0	20	0	0	1	2	2	1	2	3	1
6765	1	1	1	1	0	1	1	1	1	1	2	1	1	3	0	1	0	20	0	0	1	1	1	1	1	2	1
6766	0	4	1	1	0	0	1	1	0	1	2	1	1	3	0	1	0	20	0	0	1	1	1	1	1	2	1
6767	0	3	1	1	0	0	2	2	0	0	2	1	1	3	0	1	0	20	0	0	1	2	2	1	1	2	1
6783	1	1	1	1	4	1	1	2	1	1	0	1	2	3	0	0	1	20	0	0	1	1	2	1	2	3	1
6784	0	5	1	1	4	0	2	2	1	1	1	1	1	3	0	0	1	20	0	0	1	2	2	1	1	2	1
6789	0	4	1	1	0	1	1	1	0	1	0	1	1	4	0	0	1	20	0	0	1	1	1	1	1	2	1
6790	1	4	1	1	2	0	1	1	0	1	2	1	1	4	0	0	1	14	0	0	1	1	1	1	1	2	1
6792	0	2	1	1	2	1	2	1	0	1	1	2	2	4	0	1	0	20	0	0	1	2	1	2	2	4	1
6793	1	3	1	1	2	0	1	2	1	1	1	1	2	4	0	0	1	20	0	0	1	1	2	1	2	3	1
6794	1	2	1	1	1	0	2	1	0	1	2	2	2	4	0	1	0	20	0	0	1	2	1	2	2	4	1
6795	1	2	1	1	0	1	2	1	1	0	2	2	2	4	0	1	0	20	0	0	1	2	1	2	2	4	1
6796	1	4	1	1	2	0	1	1	0	1	2	1	1	4	0	0	1	14	0	0	1	1	1	1	1	2	1
6797	1	4	1	1	2	0	1	1	0	1	2	1	1	4	0	0	1	14	0	0	1	1	1	1	1	2	1
6799	0	1	1	1	3	0	1	1	1	1	2	1	1	4	0	0	1	20	4	0	1	1	1	1	1	2	5
6801	0	4	1	1	0	0	1	1	0	1	2	1	2	5	0	0	1	20	0	0	1	1	1	1	2	3	1
6802	1	3	1	1	2	0	1	2	1	1	1	1	2	5	0	0	1	20	0	0	1	1	2	1	2	3	1
6803	0	1	1	1	3	0	1	1	0	1	1	1	1	5	0	0	1	20	0	0	1	1	1	1	1	2	1
6804	0	1	1	1	3	0	1	1	1	1	2	1	1	5	0	0	1	20	0	0	1	1	1	1	1	2	1
6809	0	5	1	1	4	0	1	2	1	1	1	1	2	5	0	0	1	20	0	0	1	1	2	1	2	3	1
6810	0	1	1	1	0	0	1	1	0	0	2	1	2	5	0	1	0	20	0	0	1	1	1	1	2	3	1
6811	0	5	1	1	4	0	1	1	1	1	1	1	1	5	0	0	1	20	0	0	1	1	1	1	1	2	1
6814	0	4	1	1	0	0	1	1	0	1	2	1	1	5	0	1	0	20	0	0	1	1	1	1	1	2	1
6815	0	4	1	1	0	1	1	1	0	1	0	1	1	5	0	0	1	20	0	0	1	1	1	1	1	2	1
6819	0	4	1	1	0	1	2	1	0	1	0	1	1	6	0	0	1	20	0	0	1	2	1	1	1	2	1
6820	0	4	1	1	0	1	2	1	0	1	0	1	1	7	0	0	1	20	0	0	1	2	1	1	1	2	1
6821	0	4	1	1	0	1	2	1	0	1	0	1	1	8	0	0	1	20	0	0	1	2	1	1	1	2	1
6822	0	4	1	1	0	1	1	1	0	1	0	1	1	9	0	0	1	20	0	0	1	1	1	1	1	2	1
6823	0	4	1	1	0	1	1	1	0	1	0	1	1	10	0	0	1	20	0	0	1	1	1	1	1	2	1
6824	0	4	1	1	0	1	1	1	0	1	0	1	1	11	0	0	1	11	0	0	1	1	1	1	1	2	1
6825	0	4	1	1	0	1	1	1	0	1	0	1	1	12	0	0	1	14	0	0	1	1	1	1	1	2	1
1260	1	1	1	2	0	1	1	1	1	1	0	2	1	1	0	1	0	20	0	1	1	1	1	2	1	3	1
1261	1	1	1	2	1	1	2	1	0	1	0	2	1	1	0	0	1	20	0	1	1	2	1	2	1	3	1
1262	0	3	1	2	2	0	1	2	0	1	2	3	2	1	0	1	0	20	0	1	1	1	2	3	2	5	1
1264	0	1	1	2	3	0	3	1	1	1	2	2	1	1	0	0	1	20	0	1	1	3	1	2	1	3	1
1265	0	2	1	2	2	0	2	2	1	1	2	1	1	1	0	0	1	20	0	1	1	2	2	1	1	2	1
1268	1	1	1	2	1	1	1	1	0	1	0	2	1	1	0	0	1	20	0	1	1	1	1	2	1	3	1
1269	0	1	1	2	2	0	1	1	1	1	2	2	1	1	0	0	1	20	0	1	1	1	1	2	1	3	1
1271	1	1	1	2	0	1	1	1	1	0	1	2	1	1	0	1	0	20	0	1	1	1	1	2	1	3	1
1273	1	4	1	2	0	1	1	1	1	1	2	1	1	1	0	1	0	20	0	1	1	1	1	1	1	2	1
1276	1	1	1	2	4	1	3	1	1	1	0	1	1	1	0	0	1	20	0	1	1	3	1	1	1	2	1
1280	0	1	1	2	3	0	1	1	0	0	2	2	1	1	0	0	0	20	0	1	0	1	1	2	1	3	0
1282	1	1	1	2	0	1	1	1	1	1	2	2	1	1	0	1	0	20	0	1	1	1	1	2	1	3	1
1283	1	4	1	2	1	1	1	2	0	1	0	3	2	1	0	0	1	20	0	1	1	1	2	3	2	5	1
1288	0	3	1	2	2	0	1	2	0	1	2	3	2	1	0	1	0	20	0	1	1	1	2	3	2	5	1
1289	1	4	1	2	1	1	1	2	0	1	0	3	2	1	0	0	1	20	0	1	1	1	2	3	2	5	1
1291	1	4	1	2	2	0	1	2	0	1	2	3	2	1	0	0	1	14	0	1	1	1	2	3	2	5	1
1295	1	3	1	2	0	1	1	2	1	0	2	3	2	1	0	1	0	20	0	1	1	1	2	3	2	5	1
1296	0	4	1	2	0	1	2	2	1	1	2	1	1	1	0	1	0	20	0	1	1	2	2	1	1	2	1
1297	0	2	1	2	2	0	2	3	1	1	2	1	1	1	0	0	1	20	0	1	1	2	3	1	1	2	1
1300	0	1	1	2	3	0	1	1	1	1	2	2	1	1	0	0	1	20	0	1	1	1	1	2	1	3	1
1307	1	4	1	2	0	1	1	1	1	1	2	1	1	1	0	1	0	20	0	1	1	1	1	1	1	2	1
1308	0	2	1	2	2	0	3	3	1	1	2	1	1	1	0	0	1	20	0	1	1	3	3	1	1	2	1
1311	1	4	1	2	0	1	1	1	1	1	2	1	1	1	0	1	0	20	0	1	1	1	1	1	1	2	1
1312	0	1	1	2	2	1	1	1	0	1	1	2	1	1	0	1	0	20	0	1	1	1	1	2	1	3	1
1315	0	3	1	2	2	0	1	2	0	1	2	3	2	1	0	1	0	20	0	1	1	1	2	3	2	5	1
1317	1	4	1	2	2	0	1	2	1	1	2	3	2	1	0	0	1	12	0	1	1	1	2	3	2	5	1
1320	1	3	1	2	4	1	1	2	1	1	0	3	2	1	0	0	1	20	0	1	1	1	2	3	2	5	1
1323	1	4	1	2	0	1	1	1	1	1	2	1	1	1	0	1	0	20	0	1	1	1	1	1	1	2	1
1325	0	3	1	2	2	0	1	2	0	1	2	3	2	1	0	1	0	20	0	1	1	1	2	3	2	5	1
1330	1	1	1	2	0	1	1	1	1	1	2	2	1	1	0	1	0	20	0	1	1	1	1	2	1	3	1
1331	1	4	1	2	3	0	1	1	0	1	2	1	1	1	0	0	0	20	0	1	0	1	1	1	1	2	0
1334	0	3	1	2	2	0	1	2	0	1	2	3	2	1	0	1	0	20	0	1	1	1	2	3	2	5	1
1335	1	1	1	2	0	1	1	1	1	1	2	2	1	1	0	1	0	20	0	1	1	1	1	2	1	3	1
1337	0	1	1	2	2	0	1	1	0	1	2	2	1	1	0	0	0	20	0	1	0	1	1	2	1	3	0
1338	1	4	1	2	2	0	1	2	0	1	2	3	2	1	0	0	1	14	0	1	1	1	2	3	2	5	1
1339	1	1	1	2	3	0	1	1	0	0	2	2	1	1	0	0	0	20	0	1	0	1	1	2	1	3	0
1340	1	1	1	2	3	0	1	1	0	1	2	2	1	1	0	0	0	20	0	1	0	1	1	2	1	3	0
1346	0	1	1	2	2	1	1	1	0	1	1	2	1	1	0	1	0	20	0	1	1	1	1	2	1	3	1
1348	0	1	1	2	3	0	1	1	0	0	2	2	1	1	0	0	0	20	0	1	0	1	1	2	1	3	0
1350	1	5	1	2	4	1	2	1	1	1	1	1	1	1	0	0	1	20	0	1	1	2	1	1	1	2	1
1351	1	1	1	2	0	1	1	1	0	0	1	2	1	1	0	1	0	20	0	1	1	1	1	2	1	3	1
1354	0	1	1	2	3	0	1	1	1	1	2	2	1	1	0	0	1	20	0	1	1	1	1	2	1	3	1
1355	0	1	1	2	3	0	1	1	0	0	2	2	1	1	0	0	0	20	0	1	0	1	1	2	1	3	0
1359	0	1	1	2	3	0	2	1	1	1	2	2	1	1	0	0	1	20	0	1	1	2	1	2	1	3	1
1363	0	2	1	2	2	0	2	2	1	1	2	1	1	1	0	0	1	20	0	1	1	2	2	1	1	2	1
1364	1	2	1	2	4	1	1	2	1	1	0	1	1	1	0	0	1	20	0	1	1	1	2	1	1	2	1
1365	0	1	1	2	2	0	1	1	1	1	2	2	1	1	0	0	1	20	0	1	1	1	1	2	1	3	1
1370	1	1	1	2	0	1	1	1	1	1	2	2	1	1	0	1	0	20	0	1	1	1	1	2	1	3	1
1375	0	2	1	2	2	0	1	2	1	1	2	1	1	1	0	0	1	20	0	1	1	1	2	1	1	2	1
1376	1	3	1	2	2	0	1	2	0	0	2	2	2	1	0	0	0	20	0	1	0	1	2	2	2	4	0
1378	1	1	1	2	0	1	1	1	1	1	2	2	1	1	0	1	0	20	0	1	1	1	1	2	1	3	1
1400	0	4	1	2	0	1	2	1	1	1	2	1	1	2	0	1	0	20	0	1	1	2	1	1	1	2	1
1409	1	5	1	2	4	1	2	1	1	1	1	1	1	2	0	0	1	20	0	1	1	2	1	1	1	2	1
1413	1	1	1	2	4	1	2	1	1	1	0	1	1	2	0	0	1	20	0	1	1	2	1	1	1	2	1
1415	1	1	1	2	2	0	3	1	1	1	2	1	1	2	0	0	1	20	0	1	1	3	1	1	1	2	1
1418	0	4	1	2	2	0	1	1	0	1	2	1	1	2	0	0	0	20	0	1	0	1	1	1	1	2	0
1420	1	2	1	2	3	0	1	1	0	0	2	2	2	3	0	1	0	20	0	1	1	1	1	2	2	4	1
1421	1	2	1	2	0	1	2	1	1	1	0	2	2	3	0	1	0	20	0	1	1	2	1	2	2	4	1
1423	1	2	1	2	3	0	1	1	0	0	2	1	2	3	0	1	0	20	0	1	1	1	1	1	2	3	1
1425	1	2	1	2	3	0	1	1	0	0	2	1	2	3	0	1	0	20	0	1	1	1	1	1	2	3	1
1426	1	5	1	2	4	0	2	2	1	1	1	1	1	3	0	0	1	20	0	1	1	2	2	1	1	2	1
1428	1	2	1	2	3	0	1	1	0	0	2	2	2	3	0	1	0	20	0	1	1	1	1	2	2	4	1
1429	1	1	1	2	2	0	3	1	1	1	2	1	1	3	0	0	1	12	0	1	1	3	1	1	1	2	1
1432	1	2	1	2	3	0	1	1	0	0	2	1	2	3	0	1	0	20	0	1	1	1	1	1	2	3	1
1433	1	2	1	2	3	0	1	1	0	0	2	1	2	3	0	1	0	20	0	1	1	1	1	1	2	3	1
1434	1	1	1	2	2	0	3	1	1	1	2	1	1	3	0	0	1	20	4	1	1	3	1	1	1	2	5
1436	1	2	1	2	0	1	2	1	1	1	2	2	2	3	0	1	0	20	0	1	1	2	1	2	2	4	1
1437	1	5	1	2	4	0	2	2	1	1	1	1	1	3	0	0	1	20	0	1	1	2	2	1	1	2	1
1439	0	1	1	2	3	0	2	1	1	1	2	2	1	3	0	0	1	20	0	1	1	2	1	2	1	3	1
1441	0	1	1	2	3	0	1	1	1	1	2	2	1	3	0	0	1	20	0	1	1	1	1	2	1	3	1
1444	1	2	1	2	3	0	2	1	0	0	2	2	2	3	0	1	0	20	0	1	1	2	1	2	2	4	1
1448	1	2	1	2	3	0	2	1	0	0	2	2	2	3	0	1	0	20	0	1	1	2	1	2	2	4	1
1449	1	2	1	2	0	0	2	1	0	1	2	2	2	3	0	1	0	20	0	1	1	2	1	2	2	4	1
1452	0	2	1	2	2	0	2	2	1	1	2	3	3	3	0	0	1	20	0	1	1	2	2	3	3	6	1
1453	1	2	1	2	0	1	2	1	1	1	2	2	2	3	0	1	0	20	0	1	1	2	1	2	2	4	1
1454	1	3	1	2	2	0	1	2	0	0	2	1	2	3	0	0	0	20	0	1	0	1	2	1	2	3	0
1455	0	4	1	2	0	1	2	2	1	1	2	1	1	3	0	1	0	20	0	1	1	2	2	1	1	2	1
1456	1	2	1	2	3	0	1	1	0	0	2	2	2	3	0	1	0	20	0	1	1	1	1	2	2	4	1
1457	1	2	1	2	3	0	1	1	0	0	2	1	2	3	0	1	0	20	0	1	1	1	1	1	2	3	1
1459	1	2	1	2	3	0	1	1	0	0	2	2	2	3	0	1	0	20	0	1	1	1	1	2	2	4	1
1460	1	5	1	2	4	1	2	1	1	1	1	1	1	4	0	0	1	20	0	1	1	2	1	1	1	2	1
1470	1	2	1	2	3	0	2	1	0	0	2	2	2	4	0	0	0	20	0	1	0	2	1	2	2	4	0
1479	1	1	1	2	4	1	3	1	1	1	0	1	1	5	0	0	1	20	0	1	1	3	1	1	1	2	1
5969	0	1	1	2	3	0	2	1	1	1	2	2	1	1	0	0	1	20	0	0	1	2	1	2	1	3	1
5971	1	1	1	2	1	1	2	1	0	1	0	2	1	1	0	0	1	20	0	0	1	2	1	2	1	3	1
5973	1	1	1	2	0	1	1	1	1	1	2	2	1	1	0	1	0	19	1	0	1	1	1	2	1	3	2
5975	0	1	1	2	3	0	1	1	1	1	2	2	1	1	0	0	1	20	0	0	1	1	1	2	1	3	1
5976	1	4	1	2	0	1	1	1	1	1	2	1	1	1	0	1	0	20	0	0	1	1	1	1	1	2	1
5977	0	1	1	2	3	0	1	1	0	0	2	2	1	1	0	0	0	20	0	0	0	1	1	2	1	3	0
5978	1	3	1	2	0	1	1	2	1	0	2	3	2	1	0	1	0	20	0	0	1	1	2	3	2	5	1
5979	1	2	1	2	4	1	1	2	1	1	0	1	1	1	0	0	1	20	0	0	1	1	2	1	1	2	1
5984	1	4	1	2	0	1	1	1	1	1	2	1	1	1	0	1	0	20	0	0	1	1	1	1	1	2	1
5985	0	1	1	2	2	0	1	1	1	1	2	2	1	1	0	0	1	20	0	0	1	1	1	2	1	3	1
5986	0	2	1	2	2	0	2	3	1	1	2	1	1	1	0	0	1	20	0	0	1	2	3	1	1	2	1
5987	0	2	1	2	2	0	2	3	1	1	2	1	1	1	0	0	1	20	0	0	1	2	3	1	1	2	1
5991	0	2	1	2	2	0	2	2	1	1	2	1	1	1	0	0	1	20	0	0	1	2	2	1	1	2	1
5992	0	1	1	2	3	0	1	1	1	1	2	2	1	1	0	0	1	20	0	0	1	1	1	2	1	3	1
5994	0	1	1	2	2	0	1	1	1	1	2	2	1	1	0	0	1	20	0	0	1	1	1	2	1	3	1
5995	0	1	1	2	2	0	1	1	1	1	2	2	1	1	0	0	1	20	0	0	1	1	1	2	1	3	1
5996	1	1	1	2	3	0	1	1	0	1	2	2	1	1	0	0	0	20	0	0	0	1	1	2	1	3	0
6000	1	1	1	2	0	1	1	1	1	1	2	1	1	1	0	1	0	20	0	0	1	1	1	1	1	2	1
6003	1	2	1	2	4	1	1	2	1	1	0	1	1	1	0	0	1	20	0	0	1	1	2	1	1	2	1
6005	1	4	1	2	0	0	1	2	0	1	1	3	2	1	0	0	1	20	0	0	1	1	2	3	2	5	1
6006	0	4	1	2	0	1	1	1	1	1	2	1	1	1	0	1	0	20	0	0	1	1	1	1	1	2	1
6007	1	1	1	2	1	1	2	1	0	1	0	2	1	1	0	0	1	20	0	0	1	2	1	2	1	3	1
6008	1	4	1	2	2	0	1	2	0	1	2	3	2	1	0	0	1	14	0	0	1	1	2	3	2	5	1
6009	0	1	1	2	2	1	1	1	0	1	1	2	1	1	0	1	0	20	0	0	1	1	1	2	1	3	1
6012	0	4	1	2	0	1	1	1	1	1	2	1	1	1	0	1	0	20	0	0	1	1	1	1	1	2	1
6016	0	4	1	2	0	1	2	2	1	1	2	1	1	1	0	1	0	20	0	0	1	2	2	1	1	2	1
6017	0	1	1	2	2	0	1	1	1	1	2	2	1	1	0	0	1	20	0	0	1	1	1	2	1	3	1
6018	1	2	1	2	0	1	2	1	1	1	2	2	2	1	0	1	0	20	0	0	1	2	1	2	2	4	1
6019	0	1	1	2	2	0	1	1	0	1	2	2	1	1	0	0	0	20	0	0	0	1	1	2	1	3	0
6021	0	2	1	2	2	0	3	3	1	1	2	1	1	1	0	0	1	20	0	0	1	3	3	1	1	2	1
6024	0	3	1	2	2	0	1	2	0	1	2	3	2	1	0	1	0	20	0	0	1	1	2	3	2	5	1
6025	1	4	1	2	2	0	1	2	0	1	2	3	2	1	0	0	1	16	0	0	1	1	2	3	2	5	1
6030	0	3	1	2	2	0	1	2	0	1	2	3	2	1	0	1	0	20	0	0	1	1	2	3	2	5	1
6034	1	2	1	2	0	1	2	1	1	1	2	2	2	1	0	1	0	20	0	0	1	2	1	2	2	4	1
6036	0	3	1	2	2	0	1	2	0	1	2	3	2	1	0	1	0	20	0	0	1	1	2	3	2	5	1
6040	1	1	1	2	0	1	1	1	1	0	1	2	1	1	0	1	0	20	0	0	1	1	1	2	1	3	1
6041	1	4	1	2	0	1	1	1	1	1	2	1	1	1	0	1	0	20	0	0	1	1	1	1	1	2	1
6047	1	5	1	2	4	1	2	1	1	1	1	1	1	1	0	0	1	20	0	0	1	2	1	1	1	2	1
6048	0	1	1	2	3	0	1	1	1	1	2	2	1	1	0	0	1	20	0	0	1	1	1	2	1	3	1
6050	0	3	1	2	2	0	1	2	0	1	2	3	2	1	0	1	0	20	0	0	1	1	2	3	2	5	1
6054	1	5	1	2	0	0	1	1	1	1	2	1	2	1	0	0	0	20	0	0	0	1	1	1	2	3	0
6056	0	1	1	2	2	1	1	1	0	1	1	2	1	1	0	1	0	20	0	0	1	1	1	2	1	3	1
6059	0	1	1	2	3	0	1	1	1	1	2	2	1	1	0	0	1	20	0	0	1	1	1	2	1	3	1
6060	0	1	1	2	3	0	1	1	0	0	2	2	1	1	0	0	0	20	0	0	0	1	1	2	1	3	0
6061	0	1	1	2	2	0	1	1	1	1	2	2	1	1	0	0	1	20	0	0	1	1	1	2	1	3	1
6062	0	1	1	2	2	0	1	1	1	1	2	2	1	1	0	0	1	20	0	0	1	1	1	2	1	3	1
6063	1	3	1	2	0	1	1	2	1	0	2	3	2	1	0	1	0	20	0	0	1	1	2	3	2	5	1
6064	0	4	1	2	0	1	1	1	1	1	2	1	1	1	0	1	0	20	0	0	1	1	1	1	1	2	1
6065	0	1	1	2	2	1	1	1	0	1	1	2	1	1	0	1	0	20	0	0	1	1	1	2	1	3	1
6066	1	5	1	2	0	0	1	1	1	1	2	1	2	1	0	0	0	20	0	0	0	1	1	1	2	3	0
6070	0	1	1	2	2	1	1	1	0	1	1	2	1	1	0	1	0	20	0	0	1	1	1	2	1	3	1
6073	0	1	1	2	3	0	1	1	0	0	2	2	1	1	0	0	0	20	0	0	0	1	1	2	1	3	0
6074	0	1	1	2	2	0	1	1	0	1	2	2	1	1	0	0	0	20	0	0	0	1	1	2	1	3	0
6076	0	3	1	2	2	0	1	2	0	1	2	3	2	1	0	1	0	20	0	0	1	1	2	3	2	5	1
6078	1	1	1	2	0	1	1	1	1	1	0	2	1	1	0	1	0	20	0	0	1	1	1	2	1	3	1
6079	1	1	1	2	3	0	1	1	0	1	2	2	1	1	0	0	0	20	0	0	0	1	1	2	1	3	0
6084	1	4	1	2	2	0	1	2	1	1	2	3	2	1	0	0	1	12	0	0	1	1	2	3	2	5	1
6086	1	4	1	2	0	1	1	1	1	1	2	1	1	1	0	1	0	20	0	0	1	1	1	1	1	2	1
6087	0	1	1	2	3	0	1	1	1	1	2	2	1	1	0	0	1	20	0	0	1	1	1	2	1	3	1
6088	0	1	1	2	3	0	2	1	1	1	2	2	1	1	0	0	1	20	0	0	1	2	1	2	1	3	1
6089	0	1	1	2	3	0	1	1	1	1	2	2	1	1	0	0	1	20	0	0	1	1	1	2	1	3	1
6090	0	1	1	2	3	0	1	1	0	0	2	2	1	1	0	0	0	20	0	0	0	1	1	2	1	3	0
6091	0	1	1	2	3	0	1	1	0	0	2	2	1	1	0	0	0	20	0	0	0	1	1	2	1	3	0
6092	0	1	1	2	3	0	1	1	0	0	2	2	1	1	0	0	0	20	0	0	0	1	1	2	1	3	0
6093	1	1	1	2	1	1	1	1	0	1	0	2	1	1	0	0	1	20	0	0	1	1	1	2	1	3	1
6094	0	1	1	2	2	0	1	1	0	1	2	2	1	1	0	0	0	20	0	0	0	1	1	2	1	3	0
6095	0	2	1	2	2	0	2	3	1	1	2	1	1	1	0	0	1	20	0	0	1	2	3	1	1	2	1
6096	0	1	1	2	2	0	1	1	0	1	2	2	1	1	0	0	0	20	0	0	0	1	1	2	1	3	0
6097	1	4	1	2	1	1	1	2	0	1	0	3	2	1	0	0	1	20	0	0	1	1	2	3	2	5	1
6098	1	1	1	2	0	1	1	1	1	1	0	2	1	1	0	1	0	20	0	0	1	1	1	2	1	3	1
6099	0	1	1	2	3	0	1	1	0	0	2	2	1	1	0	0	0	20	0	0	0	1	1	2	1	3	0
6100	1	4	1	2	3	0	1	1	0	1	2	1	1	1	0	0	0	20	0	0	0	1	1	1	1	2	0
6102	0	1	1	2	2	0	1	1	0	1	2	2	1	1	0	0	0	20	0	0	0	1	1	2	1	3	0
6104	1	4	1	2	3	0	1	1	0	1	2	1	1	1	0	0	0	20	0	0	0	1	1	1	1	2	0
6105	1	2	1	2	4	1	1	2	1	1	0	1	1	1	0	0	1	20	0	0	1	1	2	1	1	2	1
6107	1	4	1	2	0	0	1	3	0	1	1	1	1	1	0	0	1	20	0	0	1	1	3	1	1	2	1
6110	1	1	1	2	0	1	1	1	1	1	2	2	1	1	0	1	0	20	0	0	1	1	1	2	1	3	1
6113	0	2	1	2	2	0	3	3	1	1	2	1	1	1	0	0	1	20	0	0	1	3	3	1	1	2	1
6114	0	2	1	2	2	0	2	3	1	1	2	1	1	1	0	0	1	20	0	0	1	2	3	1	1	2	1
6117	0	4	1	2	3	0	1	2	1	1	2	3	2	1	0	0	1	20	0	0	1	1	2	3	2	5	1
6118	0	1	1	2	2	1	1	1	0	1	1	2	1	1	0	1	0	20	0	0	1	1	1	2	1	3	1
6119	1	4	1	2	2	0	1	2	0	1	2	3	2	1	0	0	1	14	0	0	1	1	2	3	2	5	1
6122	1	1	1	2	1	1	1	1	0	1	0	2	1	1	0	0	1	20	0	0	1	1	1	2	1	3	1
6123	0	1	1	2	2	0	1	1	1	1	2	2	1	1	0	0	1	20	0	0	1	1	1	2	1	3	1
6124	0	2	1	2	2	0	3	3	1	1	2	3	2	1	0	0	1	20	0	0	1	3	3	3	2	5	1
6125	1	1	1	2	1	1	2	1	0	1	0	1	1	1	0	0	1	20	0	0	1	2	1	1	1	2	1
6127	0	4	1	2	3	0	1	2	1	1	2	3	2	1	0	0	1	20	0	0	1	1	2	3	2	5	1
6128	1	3	1	2	0	1	1	2	1	1	0	3	2	1	0	1	0	20	0	0	1	1	2	3	2	5	1
6129	0	1	1	2	2	0	1	1	0	1	2	2	1	1	0	0	0	20	0	0	0	1	1	2	1	3	0
6130	0	2	1	2	2	0	3	3	1	1	2	1	1	1	0	0	1	20	0	0	1	3	3	1	1	2	1
6131	0	1	1	2	3	0	1	1	1	1	2	2	1	1	0	0	1	20	0	0	1	1	1	2	1	3	1
6133	1	4	1	2	2	0	1	2	1	1	2	3	2	1	0	0	1	12	0	0	1	1	2	3	2	5	1
6137	1	4	1	2	3	0	1	1	0	1	2	1	1	1	0	0	0	20	0	0	0	1	1	1	1	2	0
6141	1	3	1	2	4	1	1	2	1	1	0	3	2	1	0	0	1	20	0	0	1	1	2	3	2	5	1
6142	1	4	1	2	0	1	1	1	1	1	2	1	1	1	0	1	0	20	0	0	1	1	1	1	1	2	1
6143	0	1	1	2	2	0	1	1	0	1	2	2	1	1	0	0	0	20	0	0	0	1	1	2	1	3	0
6144	0	1	1	2	3	0	1	1	1	1	2	2	1	1	0	0	1	20	0	0	1	1	1	2	1	3	1
6146	0	1	1	2	3	0	1	1	1	1	2	2	1	1	0	0	1	20	0	0	1	1	1	2	1	3	1
6148	0	1	1	2	3	0	1	1	0	0	2	2	1	1	0	0	0	20	0	0	0	1	1	2	1	3	0
6149	0	1	1	2	3	0	2	1	1	1	2	2	1	1	0	0	1	20	0	0	1	2	1	2	1	3	1
6150	0	1	1	2	3	0	1	1	1	1	2	2	1	1	0	0	1	20	0	0	1	1	1	2	1	3	1
6151	1	1	1	2	2	0	3	1	1	1	2	1	1	1	0	0	1	20	0	0	1	3	1	1	1	2	1
6152	0	2	1	2	2	0	2	3	1	1	2	1	1	1	0	0	1	20	0	0	1	2	3	1	1	2	1
6155	0	3	1	2	2	0	1	2	0	1	2	3	2	1	0	1	0	20	0	0	1	1	2	3	2	5	1
6160	0	1	1	2	2	0	1	1	1	1	2	2	1	1	0	0	1	20	0	0	1	1	1	2	1	3	1
6161	0	1	1	2	2	0	1	1	0	1	2	2	1	1	0	0	0	20	0	0	0	1	1	2	1	3	0
6162	1	1	1	2	4	1	3	1	1	1	0	1	1	1	0	0	1	20	0	0	1	3	1	1	1	2	1
6164	1	4	1	2	3	0	1	1	0	1	2	1	1	1	0	0	0	20	0	0	0	1	1	1	1	2	0
6169	0	2	1	2	2	0	1	2	1	1	2	1	1	1	0	0	1	20	0	0	1	1	2	1	1	2	1
6170	1	1	1	2	3	0	1	1	0	0	2	2	1	1	0	0	0	20	0	0	0	1	1	2	1	3	0
6171	0	1	1	2	2	0	1	1	0	1	2	2	1	1	0	0	0	20	0	0	0	1	1	2	1	3	0
6173	0	1	1	2	2	0	1	1	0	1	2	2	1	1	0	0	0	20	0	0	0	1	1	2	1	3	0
6175	1	4	1	2	3	0	1	1	0	1	2	1	1	1	0	0	0	20	0	0	0	1	1	1	1	2	0
6176	0	1	1	2	3	0	2	1	1	1	2	2	1	1	0	0	1	20	0	0	1	2	1	2	1	3	1
6177	1	4	1	2	0	1	1	1	1	1	2	1	1	1	0	1	0	20	0	0	1	1	1	1	1	2	1
6178	0	1	1	2	3	0	1	1	1	1	2	2	1	1	0	0	1	20	0	0	1	1	1	2	1	3	1
6179	0	1	1	2	3	0	1	1	1	1	2	2	1	1	0	0	1	20	0	0	1	1	1	2	1	3	1
6181	0	1	1	2	3	0	1	1	0	0	2	2	1	1	0	0	0	20	0	0	0	1	1	2	1	3	0
6183	0	1	1	2	3	0	1	1	1	1	2	2	1	1	0	0	1	20	0	0	1	1	1	2	1	3	1
6186	1	4	1	2	0	1	1	1	1	1	2	1	1	1	0	1	0	20	0	0	1	1	1	1	1	2	1
6187	0	1	1	2	3	0	1	1	0	0	2	2	1	1	0	0	0	20	0	0	0	1	1	2	1	3	0
6190	0	1	1	2	2	0	1	1	1	1	2	2	1	1	0	0	1	20	0	0	1	1	1	2	1	3	1
6194	0	1	1	2	0	1	1	1	1	1	2	2	1	1	0	1	0	20	2	0	1	1	1	2	1	3	3
6195	1	5	1	2	0	0	1	1	1	1	2	1	2	1	0	0	0	20	0	0	0	1	1	1	2	3	0
6197	0	1	1	2	3	0	1	1	0	0	2	2	1	1	0	0	0	20	0	0	0	1	1	2	1	3	0
6199	0	1	1	2	3	0	1	1	0	0	2	2	1	1	0	0	0	20	0	0	0	1	1	2	1	3	0
6202	0	1	1	2	2	0	1	1	0	1	2	2	1	1	0	0	0	20	0	0	0	1	1	2	1	3	0
6204	1	5	1	2	0	0	1	1	1	1	2	1	2	1	0	0	0	20	0	0	0	1	1	1	2	3	0
6205	1	1	1	2	0	1	1	1	1	1	2	1	1	1	0	1	0	20	0	0	1	1	1	1	1	2	1
6206	1	1	1	2	0	1	1	1	1	1	2	2	1	1	0	1	0	20	0	0	1	1	1	2	1	3	1
6213	0	1	1	2	3	0	1	1	1	1	2	2	1	1	0	0	1	20	0	0	1	1	1	2	1	3	1
6216	0	2	1	2	2	0	1	2	1	1	2	1	1	1	0	0	1	20	0	0	1	1	2	1	1	2	1
6218	1	1	1	2	0	1	1	1	1	1	2	2	1	1	0	1	0	20	0	0	1	1	1	2	1	3	1
6219	0	1	1	2	2	1	1	1	0	1	1	2	1	1	0	1	0	20	0	0	1	1	1	2	1	3	1
6220	1	1	1	2	0	1	1	1	1	1	0	2	1	1	0	1	0	20	0	0	1	1	1	2	1	3	1
6224	1	1	1	2	0	1	1	1	1	1	2	2	1	1	0	1	0	20	0	0	1	1	1	2	1	3	1
6225	0	1	1	2	2	0	1	1	1	1	2	2	1	1	0	0	1	20	0	0	1	1	1	2	1	3	1
6226	0	1	1	2	2	1	1	1	0	1	1	2	1	1	0	1	0	20	0	0	1	1	1	2	1	3	1
6228	0	1	1	2	2	0	1	1	1	1	2	2	1	1	0	0	1	20	0	0	1	1	1	2	1	3	1
6229	0	1	1	2	2	0	1	1	1	1	2	2	1	1	0	0	1	20	0	0	1	1	1	2	1	3	1
6232	0	2	1	2	2	0	1	2	1	1	2	1	1	1	0	0	1	20	0	0	1	1	2	1	1	2	1
6233	0	2	1	2	2	0	3	3	1	1	2	1	1	1	0	0	1	20	0	0	1	3	3	1	1	2	1
6234	1	4	1	2	2	0	1	2	0	1	2	3	2	1	0	0	1	14	0	0	1	1	2	3	2	5	1
6235	0	4	1	2	0	1	1	1	1	1	2	1	1	1	0	1	0	20	0	0	1	1	1	1	1	2	1
6236	0	1	1	2	2	1	1	1	0	1	1	2	1	1	0	1	0	20	0	0	1	1	1	2	1	3	1
6238	0	1	1	2	2	1	1	1	0	1	1	2	1	1	0	1	0	20	0	0	1	1	1	2	1	3	1
6241	0	2	1	2	2	0	2	3	1	1	2	1	1	1	0	0	1	20	0	0	1	2	3	1	1	2	1
6242	0	3	1	2	2	0	1	2	0	1	2	3	2	1	0	1	0	20	0	0	1	1	2	3	2	5	1
6244	1	4	1	2	0	0	1	3	0	1	1	1	1	1	0	0	1	20	0	0	1	1	3	1	1	2	1
6248	1	1	1	2	3	0	1	1	0	1	2	2	1	1	0	0	0	20	0	0	0	1	1	2	1	3	0
6249	1	1	1	2	1	1	3	1	0	1	0	1	1	1	0	0	1	20	0	0	1	3	1	1	1	2	1
6250	0	1	1	2	2	0	1	1	1	1	2	2	1	1	0	0	1	20	0	0	1	1	1	2	1	3	1
6252	0	1	1	2	2	1	1	1	0	1	1	2	1	1	0	1	0	20	0	0	1	1	1	2	1	3	1
6253	1	1	1	2	4	1	3	1	1	1	0	1	1	1	0	0	1	20	0	0	1	3	1	1	1	2	1
6254	0	1	1	2	3	0	1	1	1	1	2	2	1	1	0	0	1	20	0	0	1	1	1	2	1	3	1
6255	0	1	1	2	2	0	1	1	1	1	2	2	1	1	0	0	1	20	0	0	1	1	1	2	1	3	1
6258	1	1	1	2	3	0	1	1	0	1	2	2	1	1	0	0	0	20	0	0	0	1	1	2	1	3	0
6259	1	5	1	2	4	1	2	1	1	1	0	1	1	1	0	0	1	20	0	0	1	2	1	1	1	2	1
6260	0	1	1	2	2	0	1	1	0	1	2	2	1	1	0	0	0	20	0	0	0	1	1	2	1	3	0
6261	1	4	1	2	1	1	1	2	0	1	0	3	2	1	0	0	1	20	0	0	1	1	2	3	2	5	1
6265	0	1	1	2	2	0	1	1	1	1	2	2	1	1	0	0	1	20	0	0	1	1	1	2	1	3	1
6266	1	4	1	2	0	1	1	1	1	1	2	1	1	1	0	1	0	20	0	0	1	1	1	1	1	2	1
6267	0	2	1	2	2	0	2	3	1	1	2	1	1	1	0	0	1	20	0	0	1	2	3	1	1	2	1
6270	1	3	1	2	4	1	1	2	1	1	0	3	2	1	0	0	1	20	0	0	1	1	2	3	2	5	1
6272	1	5	1	2	4	1	2	1	1	1	0	1	1	1	0	0	1	20	0	0	1	2	1	1	1	2	1
6273	0	2	1	2	2	0	3	3	1	1	2	1	1	1	0	0	1	20	0	0	1	3	3	1	1	2	1
6275	1	1	1	2	0	1	1	1	0	0	1	2	1	1	0	1	0	20	0	0	1	1	1	2	1	3	1
6277	0	1	1	2	2	0	1	1	0	1	2	2	1	1	0	0	0	20	0	0	0	1	1	2	1	3	0
6278	0	3	1	2	2	0	1	2	0	1	2	3	2	1	0	1	0	20	0	0	1	1	2	3	2	5	1
6279	0	1	1	2	2	1	1	1	0	1	1	2	1	1	0	1	0	20	0	0	1	1	1	2	1	3	1
6280	1	4	1	2	0	0	1	3	0	1	1	1	1	1	0	0	1	20	0	0	1	1	3	1	1	2	1
6281	0	4	1	2	3	0	1	2	1	1	2	3	2	1	0	0	1	20	0	0	1	1	2	3	2	5	1
6286	0	1	1	2	3	0	1	1	0	0	2	2	1	1	0	0	0	20	0	0	0	1	1	2	1	3	0
6287	1	2	1	2	3	0	2	1	0	0	2	2	2	1	0	0	0	20	0	0	0	2	1	2	2	4	0
6288	1	1	1	2	4	1	3	1	1	1	0	1	1	1	0	0	1	20	0	0	1	3	1	1	1	2	1
6290	0	1	1	2	3	0	1	1	0	0	2	2	1	1	0	0	0	20	0	0	0	1	1	2	1	3	0
6294	1	4	1	2	2	0	1	2	1	1	2	1	1	1	0	0	1	12	0	0	1	1	2	1	1	2	1
6295	0	1	1	2	3	0	1	1	1	1	2	2	1	1	0	0	1	20	0	0	1	1	1	2	1	3	1
6296	0	1	1	2	3	0	1	1	0	0	2	2	1	1	0	0	0	20	0	0	0	1	1	2	1	3	0
6300	0	1	1	2	3	0	2	1	1	1	2	2	1	1	0	0	1	20	0	0	1	2	1	2	1	3	1
6301	0	1	1	2	3	0	1	1	1	1	2	2	1	1	0	0	1	20	0	0	1	1	1	2	1	3	1
6302	1	3	1	2	0	1	1	2	1	1	2	3	2	1	0	1	0	20	0	0	1	1	2	3	2	5	1
6303	1	4	1	2	3	0	1	1	0	1	2	1	1	1	0	0	0	20	0	0	0	1	1	1	1	2	0
6306	1	5	1	2	2	1	2	1	1	1	0	1	1	1	0	0	1	20	0	0	1	2	1	1	1	2	1
6308	0	3	1	2	2	0	1	2	0	1	2	3	2	1	0	1	0	20	0	0	1	1	2	3	2	5	1
6309	1	1	1	2	0	1	1	1	1	1	2	2	1	1	0	1	0	20	0	0	1	1	1	2	1	3	1
6311	1	1	1	2	1	1	1	1	0	1	0	2	1	1	0	0	1	20	0	0	1	1	1	2	1	3	1
6312	0	1	1	2	2	0	1	1	1	1	2	2	1	1	0	0	1	20	0	0	1	1	1	2	1	3	1
6314	0	2	1	2	2	0	2	3	1	1	2	1	1	1	0	0	1	20	0	0	1	2	3	1	1	2	1
6316	1	5	1	2	4	1	2	1	1	1	0	1	1	1	0	0	1	20	0	0	1	2	1	1	1	2	1
6317	1	5	1	2	0	0	1	1	1	1	2	1	2	1	0	0	0	20	0	0	0	1	1	1	2	3	0
6319	1	3	1	2	2	0	1	2	1	1	1	1	2	1	0	0	1	20	0	0	1	1	2	1	2	3	1
6320	1	1	1	2	0	1	1	1	1	1	2	2	1	1	0	1	0	20	0	0	1	1	1	2	1	3	1
6321	0	1	1	2	2	0	1	1	1	1	2	2	1	1	0	0	1	20	0	0	1	1	1	2	1	3	1
6322	0	2	1	2	2	0	2	3	1	1	2	1	1	1	0	0	1	20	0	0	1	2	3	1	1	2	1
6323	0	1	1	2	2	0	1	1	0	1	2	2	1	1	0	0	0	20	0	0	0	1	1	2	1	3	0
6325	1	1	1	2	0	1	1	1	0	0	1	2	1	1	0	1	0	20	0	0	1	1	1	2	1	3	1
6326	1	1	1	2	0	1	1	1	1	1	2	1	1	1	0	1	0	20	0	0	1	1	1	1	1	2	1
6328	1	1	1	2	4	1	2	1	1	1	0	1	1	1	0	0	1	20	0	0	1	2	1	1	1	2	1
6330	0	1	1	2	2	0	1	1	0	1	2	2	1	1	0	0	0	20	0	0	0	1	1	2	1	3	0
6333	0	2	1	2	2	0	1	2	1	1	2	1	1	1	0	0	1	20	0	0	1	1	2	1	1	2	1
6335	0	1	1	2	2	1	1	1	0	1	1	2	1	1	0	1	0	20	0	0	1	1	1	2	1	3	1
6336	0	2	1	2	2	0	1	2	1	1	2	1	1	1	0	0	1	20	0	0	1	1	2	1	1	2	1
6337	0	2	1	2	2	0	2	2	1	1	2	1	1	1	0	0	1	20	0	0	1	2	2	1	1	2	1
6338	1	3	1	2	0	1	1	2	1	1	2	3	2	1	0	1	0	20	0	0	1	1	2	3	2	5	1
6339	1	1	1	2	4	1	3	1	1	1	0	1	1	1	0	0	1	20	0	0	1	3	1	1	1	2	1
6341	0	4	1	2	0	1	1	1	1	1	2	1	1	1	0	1	0	20	0	0	1	1	1	1	1	2	1
6342	0	1	1	2	2	1	1	1	0	1	1	2	1	1	0	1	0	20	0	0	1	1	1	2	1	3	1
6343	1	1	1	2	2	0	3	1	1	1	2	1	1	1	0	0	1	20	0	0	1	3	1	1	1	2	1
6345	0	3	1	2	2	0	1	2	0	1	2	3	2	1	0	1	0	20	0	0	1	1	2	3	2	5	1
6349	0	1	1	2	3	0	1	1	0	0	2	2	1	1	0	0	0	20	0	0	0	1	1	2	1	3	0
6351	1	1	1	2	0	1	1	1	1	1	2	2	1	1	0	1	0	20	0	0	1	1	1	2	1	3	1
6354	0	1	1	2	3	0	1	1	1	1	2	2	1	1	0	0	1	20	0	0	1	1	1	2	1	3	1
6357	0	1	1	2	3	0	1	1	1	1	2	2	1	1	0	0	1	20	0	0	1	1	1	2	1	3	1
6359	0	1	1	2	2	0	1	1	1	1	2	2	1	1	0	0	1	20	0	0	1	1	1	2	1	3	1
6360	1	4	1	2	3	0	1	1	0	1	2	1	1	1	0	0	0	20	0	0	0	1	1	1	1	2	0
6361	0	1	1	2	2	0	1	1	0	1	2	2	1	1	0	0	0	20	0	0	0	1	1	2	1	3	0
6362	0	2	1	2	2	0	2	3	1	1	2	1	1	1	0	0	1	20	0	0	1	2	3	1	1	2	1
6364	0	1	1	2	2	0	1	1	0	1	2	2	1	1	0	0	0	20	0	0	0	1	1	2	1	3	0
6367	0	1	1	2	2	1	1	1	0	1	1	2	1	1	0	1	0	20	0	0	1	1	1	2	1	3	1
6369	1	3	1	2	0	1	1	2	1	0	2	3	2	1	0	1	0	20	0	0	1	1	2	3	2	5	1
6371	0	1	1	2	3	0	1	1	1	1	2	2	1	1	0	0	1	20	0	0	1	1	1	2	1	3	1
6372	1	5	1	2	0	0	1	1	1	1	2	1	2	1	0	0	0	20	0	0	0	1	1	1	2	3	0
6375	1	3	1	2	2	0	1	2	0	0	2	1	2	1	0	0	0	20	0	0	0	1	2	1	2	3	0
6376	0	1	1	2	2	0	1	1	1	1	2	2	1	1	0	0	1	20	0	0	1	1	1	2	1	3	1
6379	1	1	1	2	0	1	1	1	1	1	0	2	1	1	0	1	0	20	0	0	1	1	1	2	1	3	1
6517	1	3	1	2	3	0	1	2	0	0	2	3	2	2	0	0	0	20	0	0	0	1	2	3	2	5	0
6520	1	5	1	2	4	0	2	2	1	1	1	1	1	2	0	0	1	20	0	0	1	2	2	1	1	2	1
6525	1	5	1	2	4	1	2	1	1	1	1	1	1	2	0	0	1	20	0	0	1	2	1	1	1	2	1
6529	0	4	1	2	3	1	2	1	0	1	1	1	1	2	0	1	0	20	0	0	1	2	1	1	1	2	1
6533	1	3	1	2	2	0	1	2	0	0	2	1	2	2	0	0	0	20	0	0	0	1	2	1	2	3	0
6536	0	4	1	2	2	0	1	1	0	1	2	1	1	2	0	0	0	20	0	0	0	1	1	1	1	2	0
6538	1	5	1	2	4	1	2	1	1	1	1	1	1	2	0	0	1	20	0	0	1	2	1	1	1	2	1
6541	1	3	1	2	0	1	1	2	1	0	0	3	2	2	0	1	0	20	0	0	1	1	2	3	2	5	1
6542	0	4	1	2	0	1	2	1	1	1	2	1	1	2	0	1	0	20	0	0	1	2	1	1	1	2	1
6546	0	4	1	2	0	1	2	1	1	1	2	1	1	2	0	1	0	20	0	0	1	2	1	1	1	2	1
6548	1	3	1	2	0	1	1	2	1	1	0	3	2	2	0	1	0	20	0	0	1	1	2	3	2	5	1
6550	1	1	1	2	4	1	2	1	1	1	0	1	1	2	0	0	1	20	0	0	1	2	1	1	1	2	1
6552	1	3	1	2	3	0	1	2	0	0	2	3	2	2	0	0	0	20	0	0	0	1	2	3	2	5	0
6554	1	3	1	2	2	0	1	2	0	0	2	2	2	2	0	0	0	20	0	0	0	1	2	2	2	4	0
6556	1	3	1	2	2	0	1	2	0	0	2	1	2	2	0	0	0	20	0	0	0	1	2	1	2	3	0
6558	0	4	1	2	3	1	2	1	0	1	1	1	1	2	0	1	0	20	0	0	1	2	1	1	1	2	1
6560	0	4	1	2	0	1	2	1	1	1	2	1	1	2	0	1	0	20	0	0	1	2	1	1	1	2	1
6562	0	4	1	2	2	0	1	1	0	1	2	1	1	2	0	0	0	20	0	0	0	1	1	1	1	2	0
6564	1	3	1	2	2	0	1	2	0	0	2	1	2	2	0	0	0	20	0	0	0	1	2	1	2	3	0
6565	0	2	1	2	2	0	1	3	1	1	2	2	4	2	0	0	1	20	0	0	1	1	3	2	3	5	1
6568	0	4	1	2	3	1	2	1	0	1	1	1	1	2	0	1	0	20	0	0	1	2	1	1	1	2	1
6570	1	3	1	2	0	1	1	2	1	0	0	3	2	2	0	1	0	20	0	0	1	1	2	3	2	5	1
6576	0	3	1	2	2	1	1	2	0	1	2	3	2	2	0	1	0	20	0	0	1	1	2	3	2	5	1
6577	0	1	1	2	3	0	1	1	1	1	2	2	1	2	0	0	1	20	0	0	1	1	1	2	1	3	1
6581	0	4	1	2	3	1	2	1	0	1	1	1	1	2	0	1	0	20	0	0	1	2	1	1	1	2	1
6583	1	3	1	2	3	0	1	2	0	0	2	3	2	2	0	0	0	20	0	0	0	1	2	3	2	5	0
6585	1	5	1	2	4	1	2	1	1	1	1	1	1	2	0	0	1	20	0	0	1	2	1	1	1	2	1
6587	1	3	1	2	0	1	1	2	1	0	0	3	2	2	0	1	0	20	0	0	1	1	2	3	2	5	1
6590	0	4	1	2	2	0	1	1	0	1	2	1	1	2	0	0	0	20	0	0	0	1	1	1	1	2	0
6591	0	4	1	2	0	1	2	1	1	1	2	1	1	2	0	1	0	20	0	0	1	2	1	1	1	2	1
6596	0	4	1	2	3	1	2	1	0	1	1	1	1	2	0	1	0	20	0	0	1	2	1	1	1	2	1
6598	0	4	1	2	2	0	1	1	0	1	2	1	1	2	0	0	0	20	0	0	0	1	1	1	1	2	0
6600	0	4	1	2	0	1	2	1	1	1	2	1	1	2	0	1	0	20	0	0	1	2	1	1	1	2	1
6604	1	3	1	2	3	0	1	2	0	0	2	3	2	2	0	0	0	20	0	0	0	1	2	3	2	5	0
6606	1	5	1	2	4	0	2	2	1	1	1	1	1	2	0	0	1	20	0	0	1	2	2	1	1	2	1
6610	1	5	1	2	4	1	2	1	1	1	1	1	1	2	0	0	1	20	0	0	1	2	1	1	1	2	1
6619	1	3	1	2	3	0	1	2	0	0	2	3	2	2	0	0	0	20	0	0	0	1	2	3	2	5	0
6620	0	4	1	2	0	1	2	1	1	1	2	1	1	2	0	1	0	20	0	0	1	2	1	1	1	2	1
6622	1	3	1	2	3	0	1	2	0	0	2	3	2	2	0	0	0	20	0	0	0	1	2	3	2	5	0
6624	0	4	1	2	0	1	2	1	1	1	2	1	1	2	0	1	0	20	0	0	1	2	1	1	1	2	1
6632	1	3	1	2	3	0	1	2	0	0	2	3	2	2	0	0	0	20	0	0	0	1	2	3	2	5	0
6637	1	3	1	2	0	1	1	2	1	0	0	3	2	2	0	1	0	20	0	0	1	1	2	3	2	5	1
6644	0	4	1	2	2	0	1	1	0	1	2	1	1	2	0	0	0	20	0	0	0	1	1	1	1	2	0
6645	1	5	1	2	4	1	2	1	1	1	1	1	1	2	0	0	1	20	0	0	1	2	1	1	1	2	1
6647	0	4	1	2	3	1	2	1	0	1	1	1	1	2	0	1	0	20	0	0	1	2	1	1	1	2	1
6648	1	3	1	2	2	0	1	2	0	0	2	1	2	2	0	0	0	20	0	0	0	1	2	1	2	3	0
6650	1	5	1	2	4	1	2	1	1	1	1	1	1	2	0	0	1	20	0	0	1	2	1	1	1	2	1
6651	1	1	1	2	2	0	3	1	1	1	2	1	1	2	0	0	1	12	0	0	1	3	1	1	1	2	1
6652	1	3	1	2	3	0	1	2	0	0	2	3	2	2	0	0	0	20	0	0	0	1	2	3	2	5	0
6653	0	3	1	2	3	0	1	2	0	1	2	3	2	2	0	0	0	20	0	0	0	1	2	3	2	5	0
6655	0	4	1	2	0	1	2	1	1	1	2	1	1	2	0	1	0	20	0	0	1	2	1	1	1	2	1
6662	0	4	1	2	2	0	1	1	0	1	2	1	1	2	0	0	0	20	0	0	0	1	1	1	1	2	0
6667	0	3	1	2	3	0	1	2	0	1	2	3	2	2	0	0	0	20	0	0	0	1	2	3	2	5	0
6668	0	4	1	2	0	1	2	1	1	1	2	1	1	2	0	1	0	20	0	0	1	2	1	1	1	2	1
6669	0	4	1	2	0	1	2	1	1	1	2	1	1	2	0	1	0	20	0	0	1	2	1	1	1	2	1
6683	1	3	1	2	0	1	1	2	1	0	1	3	2	2	0	1	0	20	0	0	1	1	2	3	2	5	1
6684	0	1	1	2	3	0	2	1	1	1	2	2	1	2	0	0	1	20	0	0	1	2	1	2	1	3	1
6687	1	3	1	2	3	0	1	2	0	0	2	3	2	2	0	0	0	20	0	0	0	1	2	3	2	5	0
6693	1	3	1	2	3	0	1	2	0	0	2	3	2	2	0	0	0	20	0	0	0	1	2	3	2	5	0
6697	1	3	1	2	3	0	1	2	0	0	2	3	2	2	0	0	0	20	0	0	0	1	2	3	2	5	0
6699	1	1	1	2	2	0	3	1	1	1	2	1	1	2	0	0	1	12	0	0	1	3	1	1	1	2	1
6700	1	3	1	2	0	1	1	2	1	1	0	3	2	2	0	1	0	20	0	0	1	1	2	3	2	5	1
6742	0	4	1	2	0	1	2	2	1	1	2	1	1	3	0	1	0	20	0	0	1	2	2	1	1	2	1
6746	1	2	1	2	3	0	1	1	0	0	2	1	2	3	0	1	0	20	0	0	1	1	1	1	2	3	1
6747	1	5	1	2	4	0	2	2	1	1	1	2	2	3	0	0	1	20	0	0	1	2	2	2	2	4	1
6751	1	2	1	2	3	0	1	1	0	0	2	2	2	3	0	1	0	20	0	0	1	1	1	2	2	4	1
6752	1	5	1	2	4	1	2	1	1	1	1	1	1	3	0	0	1	20	0	0	1	2	1	1	1	2	1
6755	1	1	1	2	2	0	3	1	1	1	2	1	1	3	0	0	1	20	4	0	1	3	1	1	1	2	5
6756	1	2	1	2	3	0	2	1	0	0	2	2	2	3	0	1	0	20	0	0	1	2	1	2	2	4	1
6758	1	2	1	2	3	0	1	1	0	0	2	2	2	3	0	1	0	20	0	0	1	1	1	2	2	4	1
6760	1	4	1	2	2	0	1	1	0	1	2	1	2	3	0	0	0	20	0	0	0	1	1	1	2	3	0
6764	1	2	1	2	3	0	1	1	0	0	2	1	2	3	0	1	0	20	0	0	1	1	1	1	2	3	1
6768	1	2	1	2	3	0	1	1	0	0	2	2	2	3	0	1	0	20	0	0	1	1	1	2	2	4	1
6769	1	2	1	2	3	0	1	1	0	0	2	2	2	3	0	1	0	20	0	0	1	1	1	2	2	4	1
6771	1	2	1	2	3	0	1	1	0	0	2	2	2	3	0	1	0	20	0	0	1	1	1	2	2	4	1
6772	1	2	1	2	3	0	1	1	0	0	2	1	2	3	0	1	0	20	0	0	1	1	1	1	2	3	1
6773	1	5	1	2	4	0	2	2	1	1	1	1	1	3	0	0	1	20	0	0	1	2	2	1	1	2	1
6775	1	2	1	2	3	0	1	1	0	0	2	1	2	3	0	1	0	20	0	0	1	1	1	1	2	3	1
6776	1	2	1	2	0	0	2	1	0	1	2	2	2	3	0	1	0	20	0	0	1	2	1	2	2	4	1
6777	1	2	1	2	3	0	1	1	0	0	2	2	2	3	0	1	0	20	0	0	1	1	1	2	2	4	1
6779	1	2	1	2	3	0	1	1	0	0	2	2	2	3	0	1	0	20	0	0	1	1	1	2	2	4	1
6780	1	2	1	2	3	0	1	1	0	0	2	1	2	3	0	1	0	20	0	0	1	1	1	1	2	3	1
6782	1	2	1	2	0	0	2	1	0	1	2	2	2	3	0	1	0	20	0	0	1	2	1	2	2	4	1
6785	1	2	1	2	3	0	1	1	0	0	2	1	2	3	0	1	0	20	0	0	1	1	1	1	2	3	1
6786	1	2	1	2	0	0	2	1	0	1	2	2	2	3	0	1	0	20	0	0	1	2	1	2	2	4	1
6791	1	1	1	2	4	1	2	1	1	1	0	1	1	4	0	0	1	20	0	0	1	2	1	1	1	2	1
6798	1	4	1	2	2	0	1	1	0	1	2	1	2	4	0	0	0	20	0	0	0	1	1	1	2	3	0
6800	1	3	1	2	2	0	1	2	0	0	2	1	2	4	0	0	0	20	0	0	0	1	2	1	2	3	0
6805	1	1	1	2	2	0	3	1	1	1	2	1	1	5	0	0	1	20	4	0	1	3	1	1	1	2	5
6808	0	1	1	2	3	0	1	1	1	1	2	2	1	5	0	0	1	20	0	0	1	1	1	2	1	3	1
6813	1	3	1	2	2	0	1	2	0	0	2	1	2	5	0	0	0	20	0	0	0	1	2	1	2	3	0
6816	1	1	1	2	4	1	2	1	1	1	0	1	1	6	0	0	1	20	0	0	1	2	1	1	1	2	1
6817	0	4	1	2	0	1	2	2	1	1	2	1	1	6	0	1	0	20	0	0	1	2	2	1	1	2	1
6818	1	5	1	2	4	1	2	1	1	1	1	1	1	6	0	0	1	20	0	0	1	2	1	1	1	2	1
1270	0	1	1	3	3	0	1	1	0	0	2	1	1	1	0	0	0	20	0	1	0	1	1	1	1	2	0
1279	0	4	1	3	3	0	1	2	0	1	2	1	1	1	0	0	0	20	0	1	0	1	2	1	1	2	0
1347	1	1	1	3	2	0	3	1	0	1	2	1	1	1	0	0	0	20	0	1	0	3	1	1	1	2	0
1371	0	3	1	3	3	0	1	2	0	1	2	3	2	1	0	0	0	20	0	1	0	1	2	3	2	5	0
1374	1	4	1	3	2	0	1	2	0	1	2	1	1	1	0	0	0	20	0	1	0	1	2	1	1	2	0
1424	0	1	1	3	3	0	1	1	0	0	2	1	1	3	0	0	0	20	0	1	0	1	1	1	1	2	0
1430	1	1	1	3	2	0	1	1	0	0	2	1	1	3	0	0	0	20	0	1	0	1	1	1	1	2	0
1442	1	2	1	3	3	0	1	1	0	0	2	1	2	3	0	1	0	20	0	1	1	1	1	1	2	3	1
1443	1	1	1	3	2	0	3	1	0	1	2	1	1	3	0	0	0	20	0	1	0	3	1	1	1	2	0
1461	0	4	1	3	3	1	2	2	0	1	1	1	1	4	0	1	0	20	0	1	1	2	2	1	1	2	1
6010	1	2	1	3	3	0	1	1	0	0	2	1	3	1	0	1	0	20	0	0	1	1	1	1	3	4	1
6014	0	3	1	3	3	0	1	2	0	1	2	3	2	1	0	0	0	20	0	0	0	1	2	3	2	5	0
6022	1	4	1	3	2	0	1	2	0	1	2	1	1	1	0	0	0	20	0	0	0	1	2	1	1	2	0
6026	0	1	1	3	3	0	1	1	0	0	2	1	1	1	0	0	0	20	0	0	0	1	1	1	1	2	0
6042	0	4	1	3	3	0	1	2	0	1	2	1	1	1	0	0	0	20	0	0	0	1	2	1	1	2	0
6046	0	3	1	3	3	0	1	2	0	1	2	3	2	1	0	0	0	20	0	0	0	1	2	3	2	5	0
6055	0	3	1	3	3	0	1	2	0	1	2	3	2	1	0	0	0	20	0	0	0	1	2	3	2	5	0
6069	0	3	1	3	3	0	1	2	0	1	2	3	2	1	0	0	0	20	0	0	0	1	2	3	2	5	0
6108	0	3	1	3	3	0	1	2	0	1	2	3	2	1	0	0	0	20	0	0	0	1	2	3	2	5	0
6109	1	1	1	3	2	0	1	1	0	0	2	1	1	1	0	0	0	20	0	0	0	1	1	1	1	2	0
6157	0	3	1	3	3	0	1	2	0	1	2	3	2	1	0	0	0	20	0	0	0	1	2	3	2	5	0
6184	1	1	1	3	2	0	3	1	0	1	2	1	1	1	0	0	0	20	0	0	0	3	1	1	1	2	0
6192	1	4	1	3	2	0	1	2	0	1	2	1	1	1	0	0	0	20	0	0	0	1	2	1	1	2	0
6201	0	4	1	3	3	0	1	2	0	1	2	1	1	1	0	0	0	20	0	0	0	1	2	1	1	2	0
6210	1	2	1	3	3	0	1	1	0	0	2	1	1	1	0	1	0	20	0	0	1	1	1	1	1	2	1
6215	0	1	1	3	3	0	1	1	0	0	2	1	1	1	0	0	0	20	0	0	0	1	1	1	1	2	0
6245	0	3	1	3	3	0	1	2	0	1	2	3	2	1	0	0	0	20	0	0	0	1	2	3	2	5	0
6268	0	1	1	3	3	0	1	1	0	0	2	1	1	1	0	0	0	20	0	0	0	1	1	1	1	2	0
6291	0	4	1	3	3	0	1	2	0	1	2	1	1	1	0	0	0	20	0	0	0	1	2	1	1	2	0
6293	0	4	1	3	3	0	1	2	0	1	2	1	1	1	0	0	0	20	0	0	0	1	2	1	1	2	0
6299	0	3	1	3	3	0	1	2	0	1	2	3	2	1	0	0	0	20	0	0	0	1	2	3	2	5	0
6355	0	1	1	3	3	0	1	1	0	0	2	1	1	1	0	0	0	20	0	0	0	1	1	1	1	2	0
6356	0	3	1	3	3	0	1	2	0	1	2	3	2	1	0	0	0	20	0	0	0	1	2	3	2	5	0
6381		4	1	3	1	0	3	2	0	0	2	3	3	1	0	0	0	20	0	0	0	3	2	3	3	6	0
6519	0	1	1	3	3	0	1	1	0	0	2	1	1	2	0	0	0	20	0	0	0	1	1	1	1	2	0
6534	1	1	1	3	2	0	1	1	0	1	2	1	1	2	0	0	0	20	0	0	0	1	1	1	1	2	0
6537	1	1	1	3	2	0	3	1	0	1	2	1	1	2	0	0	0	20	0	0	0	3	1	1	1	2	0
6563	0	1	1	3	3	0	1	1	0	0	2	1	1	2	0	0	0	20	0	0	0	1	1	1	1	2	0
6638	1	1	1	3	2	0	1	1	0	1	2	1	1	2	0	0	0	20	0	0	0	1	1	1	1	2	0
6678	0	1	1	3	3	0	1	1	0	0	2	1	1	2	0	0	0	20	0	0	0	1	1	1	1	2	0
6695	0	1	1	3	3	0	1	1	0	0	2	1	1	2	0	0	0	20	0	0	0	1	1	1	1	2	0
6754	0	1	1	3	3	0	1	1	0	0	2	1	1	3	0	0	0	20	0	0	0	1	1	1	1	2	0
6757	0	1	1	3	3	0	1	1	0	0	2	1	1	3	0	0	0	20	0	0	0	1	1	1	1	2	0
6770	1	2	1	3	3	0	1	1	0	0	2	1	2	3	0	1	0	20	0	0	1	1	1	1	2	3	1
6774	1	2	1	3	3	0	1	1	0	0	2	1	2	3	0	1	0	20	0	0	1	1	1	1	2	3	1
6778	1	1	1	3	2	0	1	1	0	1	2	1	1	3	0	0	0	20	0	0	0	1	1	1	1	2	0
6781	0	1	1	3	3	0	1	1	0	0	2	1	1	3	0	0	0	20	0	0	0	1	1	1	1	2	0
6806	0	1	1	3	3	0	1	1	0	0	2	1	1	5	0	0	0	20	0	0	0	1	1	1	1	2	0
6807	0	1	1	3	3	0	1	1	0	0	2	1	1	5	0	0	0	20	0	0	0	1	1	1	1	2	0
6812	1	1	1	3	2	0	1	1	0	1	2	1	1	5	0	0	0	20	0	0	0	1	1	1	1	2	0
		Immigrant	Dev st
		0.753488	0.431482
		0.771712	0.420251
		0.12	0.328261

## Sheet: raw total 
id	sex	areas	Immigrants	households	breastfeeding	pacifiernight	Fatheroccprofile	motheroccprofile	smokinghabits	cariogenicdiet	brushingteeth	lowedulevelfatather	lowedulevelmother	nkids	enamel	precavitated	cavitated	teethpresent	filled	bleeding	cariestotal	fatherocc2	motherocc2	fathered	mothered	parentsed	cariesEx
1	1	2	0	2	4	1	2	1	1	1	1	2	2	1	0	1	0	20	0	0	1	2	1	2	2	4	1
2	1	3	0	1	0	0	2	1	0	0	2	2	2	1	0	0	0	20	0	0	0	2	1	2	2	4	0
3	1	3	0	1	0	0	2	1	0	0	2	2	2	1	0	0	0	20	0	0	0	2	1	2	2	4	0
4	1	2	0	2	4	1	2	1	1	1	1	2	2	1	0	1	0	20	0	0	1	2	1	2	2	4	1
5	1	3	0	1	0	0	2	1	0	0	2	2	2	1	0	0	0	20	0	0	0	2	1	2	2	4	0
6	1	3	0	1	0	0	2	1	0	0	2	2	2	1	0	0	0	20	0	0	0	2	1	2	2	4	0
7	1	3	0	1	0	0	2	1	0	0	2	2	2	1	0	0	0	20	0	0	0	2	1	2	2	4	0
8	1	3	0	1	0	0	2	1	0	0	2	2	2	1	0	0	0	20	0	0	0	2	1	2	2	4	0
9	0	1	0	1	4	1	2	1	1	1	1	2	2	1	0	1	0	20	0	0	1	2	1	2	2	4	1
10	1	3	0	1	0	0	2	1	0	0	2	2	2	1	0	0	0	20	0	0	0	2	1	2	2	4	0
11	1	3	0	1	0	0	2	1	0	0	2	2	2	1	0	0	0	20	0	0	0	2	1	2	2	4	0
12	1	3	0	1	0	0	2	2	0	0	2	2	1	1	0	0	0	20	0	0	0	2	2	2	1	3	0
13	1	3	0	1	0	0	2	1	0	0	2	2	2	1	0	0	0	20	0	0	0	2	1	2	2	4	0
14	1	3	0	1	0	0	2	1	0	0	2	2	2	1	0	0	0	20	0	0	0	2	1	2	2	4	0
15	1	3	0	1	0	0	2	1	0	0	2	2	2	1	0	0	0	20	0	0	0	2	1	2	2	4	0
16	1	3	0	1	0	0	2	2	0	0	2	2	2	1	0	0	0	20	0	0	0	2	2	2	2	4	0
17	1	3	0	1	0	0	2	1	0	0	2	2	2	1	0	0	0	20	0	0	0	2	1	2	2	4	0
18	1	3	0	1	0	0	2	1	0	0	2	2	2	1	0	0	0	20	0	0	0	2	1	2	2	4	0
19	1	3	0	1	0	0	2	1	0	0	2	2	2	1	0	0	0	20	0	0	0	2	1	2	2	4	0
20	0	2	0	1	4	1	2	1	1	1	2	2	2	1	0	1	0	20	0	0	1	2	1	2	2	4	1
21	1	3	0	1	0	0	2	1	0	0	2	2	2	1	0	0	0	20	0	0	0	2	1	2	2	4	0
22	0	2	0	2	4	0	2	1	1	1	2	2	2	1	0	1	0	20	0	0	1	2	1	2	2	4	1
23	1	3	0	1	0	0	2	1	0	0	2	2	2	1	0	0	0	20	0	0	0	2	1	2	2	4	0
24	0	2	0	2	4	1	2	1	1	1	2	2	2	1	0	1	0	20	0	0	1	2	1	2	2	4	1
25	0	2	0	2	4	1	2	1	1	1	2	2	2	1	0	1	0	20	0	0	1	2	1	2	2	4	1
26	1	2	0	2	4	1	2	1	1	1	1	2	2	1	0	1	0	20	0	0	1	2	1	2	2	4	1
27	0	2	0	3	1	1	3	1	1	1	1	3	2	1	0	0	1	20	0	1	1	3	1	3	2	5	1
28	1	1	0	3	0	0	3	2	0	0	2	2	2	1	0	0	0	20	0	1	0	3	2	2	2	4	0
29	1	3	0	4	0	0	3	3	0	0	2	3	3	1	0	0	0	20	0	1	0	3	3	3	3	6	0
30	0	1	0	2	0	0	2	2	0	1	2	3	3	1	1	0	0	20	0	1	1	2	2	3	3	6	1
31	0	4	0	2	3	1		1	1	1	1	3	3	1	0	0	1	20	0	1	1		1	3	3	6	1
32	0	2	0	3	3	1	3	3	1	1	2	3	3	1	1	0	0	20	0	1	1	3	3	3	3	6	1
33	1	3	0	2	3	0	1	1	0	0	2	1	1	1	0	0	0	20	0	1	0	1	1	1	1	2	0
34	1	2	0	4	0	0	3	3	0	0	2	3	3	1	0	0	0	20	0	1	0	3	3	3	3	6	0
35	0	2	0	3	1	1	3	3	0	1	2	2	2	1	0	0	0	20	0	1	0	3	3	2	2	4	0
36	0	4	0	1	3	0		2	0	1	2	3	3	1	0	0	1	20	0	1	1		2	3	3	6	1
37	1	3	0	2	2	0		2	1	1	2	3	3	1	0	0	1	20	0	1	1		2	3	3	6	1
38	0	4	0	2	0	1		1	1	1	1	3	3	1	0	0	1	20	0	1	1		1	3	3	6	1
39	1	2	0	3	2	0	3	2	0	0	2	2	2	1	0	0	0	20	0	1	0	3	2	2	2	4	0
40	1	2	0	3	3	0	3	2	0	0	2	3	3	1	0	0	0	20	0	1	0	3	2	3	3	6	0
41	0	1	0	3	3	0	3	3	1	0	2	3	3	1	1	0	0	20	0	1	1	3	3	3	3	6	1
42	0	5	0	1	3	1	2	1	0	1	1	2	2	1	0	0	1	20	0	1	1	2	1	2	2	4	1
43	1	5	0	2	3	0	2	1	0	0	2	1	2	1	0	0	0	20	0	1	0	2	1	1	2	3	0
44	0	2	0	2	0	1	3	2	1	1	1	3	3	1	0	0	1	20	0	1	1	3	2	3	3	6	1
45	1	1	0	2	4	1	2	2	1	1	1	2	2	1	0	1	0	20	0	1	1	2	2	2	2	4	1
46	1	3	0	2	0	0	1	2	0	0	2	1	2	1	0	0	0	20	0	1	0	1	2	1	2	3	0
47	1	5	0	3	0	1	3	2	1	1	2	3	3	1	0	0	0	20	0	1	0	3	2	3	3	6	0
48	0	5	0	2	4	1	3	2	0	1	1	1	2	1	0	0	1	20	0	1	1	3	2	1	2	3	1
49	0	2	0	3	3	0	3	2	0	0	2	3	3	1	0	0	0	20	0	1	0	3	2	3	3	6	0
50	1	1	0	2	2	0	2	2	0	0	2	2	2	1	0	0	0	20	0	1	0	2	2	2	2	4	0
51	1	5	0	3	1	0	3	2	1	1	2	3	3	1	0	0	0	20	0	1	0	3	2	3	3	6	0
52	0	5	0	1	1	0	3	3	1	0	2	3	3	1	0	0	0	20	0	1	0	3	3	3	3	6	0
53	0	4	0	3	3	1		2	0	1	2	3	3	1	0	0	0	20	0	1	0		2	3	3	6	0
54	1	3	0	2	0	0	2	1	0	0	2	2	2	1	0	0	0	20	0	1	0	2	1	2	2	4	0
55	0	4	0	2	0	1		1	1	1	1	3	3	1	0	0	1	20	0	1	1		1	3	3	6	1
56	1	3	0	3	2	0	3	3	1	0	2	3	3	1	0	0	0	20	0	1	0	3	3	3	3	6	0
57	0	2	0	3	3	0	2	1	0	1	2	2	2	1	0	0	1	20	0	1	1	2	1	2	2	4	1
58	1	1	0	2	2	0	2	2	0	0	2	2	2	1	0	0	0	20	0	1	0	2	2	2	2	4	0
59	1	1	0	4	0	0	3	2	0	0	2	2	2	1	0	0	0	20	0	1	0	3	2	2	2	4	0
60	0	1	0	1	3	0	3	2	1	0	2	3	3	1	0	0	0	20	0	1	0	3	2	3	3	6	0
61	0	1	0	3	4	0	3	2	1	1	2	3	1	1	1	0	0	20	0	1	1	3	2	3	1	4	1
62	1	5	0	2	1	0	3	2	1	1	2	2	2	1	0	0	0	20	0	1	0	3	2	2	2	4	0
63	1	2	0	3	0	0	3	2	0	0	2	2	2	1	0	0	0	20	0	1	0	3	2	2	2	4	0
64	0	5	0	2	0	1	3	2	1	1	1	2	2	1	0	0	0	20	0	1	0	3	2	2	2	4	0
65	0	4	0	2	3	1		1	1	1	1	3	3	1	0	0	1	20	0	1	1		1	3	3	6	1
66	1	1	0	3	0	0	3	2	0	0	2	2	2	1	0	0	0	20	0	1	0	3	2	2	2	4	0
67	1	1	0	3	0	0	3	3	0	1	2	3	3	1	0	0	0	20	0	1	0	3	3	3	3	6	0
68	1	1	0	4	2	0	3	2	0	1	2	2	2	1	0	0	0	20	0	1	0	3	2	2	2	4	0
69	0	5	0	2	3	0	2	1	0	0	2	2	1	1	0	0	0	20	0	1	0	2	1	2	1	3	0
70	0	5	0	1	1	0	3	3	1	0	2	3	3	1	0	0	0	20	0	1	0	3	3	3	3	6	0
71	0	4	0	3	3	0		1	1	1	1	3	3	1	0	0	1	20	0	1	1		1	3	3	6	1
72	1	3	0	2	1	1	2	2	0	1	1	2	2	1	0	0	1	20	0	1	1	2	2	2	2	4	1
73	1	3	0	3	1	0	4	1	0	0	2	4	3	1	0	0	0	20	0	1	0	3	1	3	3	6	0
74	1	3	0	3	4	0	3	3	0	0	2	3	2	1	0	0	0	20	0	1	0	3	3	3	2	5	0
75	1	4	0	3	1	0	3	2	0	1	2	3	3	1	0	0	0	20	0	1	0	3	2	3	3	6	0
76	0	1	0	4	1	0	3	3	0	0	2	3	3	1	0	0	0	20	0	1	0	3	3	3	3	6	0
77	0	4	0	3	0	0	3	2	0	0	2	3	2	1	0	0	0	20	0	1	0	3	2	3	2	5	0
78	0	3	0	1	0	1	1	2	1	1	1	1	2	1	0	0	1	20	0	1	1	1	2	1	2	3	1
79	1	4	0	1	2	0	2	1	0	0	2	2	2	1	0	0	0	20	0	1	0	2	1	2	2	4	0
80	0	5	0	2	1	0	2	1	1	0	2	2	2	1	0	0	0	20	0	1	0	2	1	2	2	4	0
81	1	3	0	3	0	1	3	3	0	0	2	3	2	1	0	0	0	20	0	1	0	3	3	3	2	5	0
82	1	5	0	3	1	0	3	3	1	1	2	3	3	1	0	0	0	20	0	1	0	3	3	3	3	6	0
83	0	2	0	2	3	0	3	2	0	1	2	3	2	1	0	0	1	20	0	1	1	3	2	3	2	5	1
84	1	2	0	3	2	0	3	3	1	0	2	3	3	1	0	0	0	20	0	1	0	3	3	3	3	6	0
85	0	3	0	3	1	0	3	3	0	0	2	3	2	1	0	0	0	20	0	1	0	3	3	3	2	5	0
86	0	2	0	1	3	1	3	2	0	1	1	3	2	1	0	0	1	20	0	1	1	3	2	3	2	5	1
87	0	1	0	2	1	1	2	2	0	1	0	2	2	1	1	0	0	20	0	1	1	2	2	2	2	4	1
88	0	3	0	2	0	1		2	0	1	2	3	3	1	1	0	0	20	0	1	1		2	3	3	6	1
89	0	2	0	2	3	1	3	2	1	1	1	3	3	1	0	0	1	20	0	1	1	3	2	3	3	6	1
90	0	5	0	1	0	1	2	1	0	0	2	2	2	1	0	0	0	20	0	1	0	2	1	2	2	4	0
91	1	2	0	3	0	0	3	2	1	0	2	3	3	1	0	0	0	20	0	1	0	3	2	3	3	6	0
92	0	4	0	3	3	1		1	1	1	2	3	3	1	1	0	0	20	1	1	1		1	3	3	6	2
93	1	2	0	4	0	0	3	3	0	0	2	3	3	1	0	0	0	20	0	1	0	3	3	3	3	6	0
94	1	1	0	2	2	0	2	2	0	0	2	2	2	1	0	0	0	20	0	1	0	2	2	2	2	4	0
95	0	5	0	2	0	1	3	2	1	1	1	2	2	1	0	0	0	20	0	1	0	3	2	2	2	4	0
96	1	1	0	3	0	0	3	2	0	0	2	2	2	1	0	0	0	20	0	1	0	3	2	2	2	4	0
97	0	3	0	2	0	0	3	1	1	0	2	3	2	1	0	0	1	20	0	1	1	3	1	3	2	5	1
98	1	3	0	2	2	0		2	0	0	2	3	3	1	0	0	0	20	0	1	0		2	3	3	6	0
99	1	4	0	1	1	1		2	1	1	1	3	3	1	0	0	1	20	0	1	1		2	3	3	6	1
100	1	1	0	3	0	0	3	2	0	0	2	2	2	1	0	0	0	20	0	1	0	3	2	2	2	4	0
101	1	1	0	3	0	0	3	3	0	1	2	3	3	1	0	0	0	20	0	1	0	3	3	3	3	6	0
102	1	1	0	4	2	0	3	2	0	0	2	3	3	1	0	0	0	20	0	1	0	3	2	3	3	6	0
103	1	3	0	4	0	1	3	3	0	0	2	3	3	1	0	0	0	20	0	1	0	3	3	3	3	6	0
104	1	2	0	2	1	1	1	2	1	1	1	2	2	1	0	0	1	20	0	1	1	1	2	2	2	4	1
105	1	1	0	3	2	0	3	2	0	0	2	3	3	1	0	0	0	20	0	1	0	3	2	3	3	6	0
106	1	5	0	2	4	0	3	3	0	0	2	3	2	1	0	0	0	20	0	1	0	3	3	3	2	5	0
107	1	1	0	3	2	0	3	2	0	0	2	3	3	1	0	0	0	20	0	1	0	3	2	3	3	6	0
108	0	5	0	1	3	1	2	1	0	1	1	2	2	1	0	0	1	20	0	1	1	2	1	2	2	4	1
109	1	1	0	3	0	0	3	3	0	1	2	3	3	1	0	0	0	20	0	1	0	3	3	3	3	6	0
110	0	2	0	3	0	1	3	3	1	1	1	3	3	1	0	0	1	20	0	1	1	3	3	3	3	6	1
111	0	5	0	2	3	0	3	2	1	0	1	2	2	1	1	0	0	20	0	1	1	3	2	2	2	4	1
112	0	1	0	2	3	0	3	1	0	1	2	3	3	1	1	0	0	20	0	1	1	3	1	3	3	6	1
113	1	4	0	2	2	0	2	2	1	1	2	2	2	1	1	0	0	20	0	1	1	2	2	2	2	4	1
114	1	1	0	3	0	0	3	3	0	1	2	3	3	1	0	0	0	20	0	1	0	3	3	3	3	6	0
115	1	1	0	3	0	0	3	2	0	0	2	3	3	1	0	0	0	20	0	1	0	3	2	3	3	6	0
116	0	2	0	3	3	1	2	2	1	1	2	3	3	1	1	0	0	20	0	1	1	2	2	3	3	6	1
117	1	5	0	3	1	0	3	3	1	1	2	3	2	1	0	0	0	20	0	1	0	3	3	3	2	5	0
118	0	3	0	3	1	0	3	3	0	0	2	3	3	1	1	0	0	20	0	1	1	3	3	3	3	6	1
119	1	2	0	3	4	0	3	3	0	0	2	3	3	1	0	0	0	20	0	1	0	3	3	3	3	6	0
120	1	1	0	4	2	0	3	2	0	0	2	3	2	1	0	0	0	20	0	1	0	3	2	3	2	5	0
121	0	5	0	2	0	1	3	2	1	1	1	2	2	1	0	0	0	20	0	1	0	3	2	2	2	4	0
122	0	4	0	2	0	0	3	1	0	0	2	3	2	1	0	0	0	20	0	1	0	3	1	3	2	5	0
123	0	5	0	3	4	0	3	3	0	1	2	3	3	1	0	0	0	20	0	1	0	3	3	3	3	6	0
124	1	2	0	3	0	0	3	2	0	0	2	2	2	1	0	0	0	20	0	1	0	3	2	2	2	4	0
125	0	4	0	2	1	0	2	1	0	0	2	2	1	1	0	0	0	20	0	1	0	2	1	2	1	3	0
126	1	4	0	1	2	0	2	1	0	0	2	2	2	1	0	0	0	20	0	1	0	2	1	2	2	4	0
127	1	5	0	3	1	0	3	2	1	1	2	1	2	1	0	0	0	20	0	1	0	3	2	1	2	3	0
128	1	4	0	1	1	1		2	1	1	1	3	3	1	0	0	1	20	0	1	1		2	3	3	6	1
129	0	5	0	3	1	0	3	3	1	1	2	3	3	1	0	0	0	20	0	1	0	3	3	3	3	6	0
130	0	5	0	2	0	1	3	2	1	1	1	2	2	1	0	0	0	20	0	1	0	3	2	2	2	4	0
131	0	3	0	1	0	0	1	2	0	0	2	1	2	1	0	0	0	20	0	1	0	1	2	1	2	3	0
132	1	3	0	2	0	0	2	1	0	0	2	2	2	1	0	0	0	20	0	1	0	2	1	2	2	4	0
133	0	5	0	3	0	1	2	1	0	1	2	1	2	1	0	0	0	20	1	1	0	2	1	1	2	3	1
134	1	1	0	3	0	0	3	2	1	0	2	3	3	1	0	0	0	20	0	1	0	3	2	3	3	6	0
135	1	3	0	2	2	0		2	1	1	2	3	3	1	0	0	1	20	0	1	1		2	3	3	6	1
136	0	4	0	2	0	0	3	1	0	0	2	3	3	1	0	0	0	20	0	1	0	3	1	3	3	6	0
137	0	5	0	2	0	1	3	2	0	1	1	2	2	1	0	0	0	20	0	1	0	3	2	2	2	4	0
138	0	5	0	1	3	1	2	2	0	1	1	2	2	1	0	0	1	20	0	1	1	2	2	2	2	4	1
139	0	4	0	1	0	1	2	1	1	1	1	3	2	1	0	0	0	20	1	1	0	2	1	3	2	5	1
140	0	2	0	1	3	0	2	2	1	0	2	2	2	1	0	0	0	20	0	1	0	2	2	2	2	4	0
141	1	2	0	3	0	0	3	2	0	0	2	2	2	1	0	0	0	20	0	1	0	3	2	2	2	4	0
142	0	1	0	1	0	0	2	2	0	1	2	2	2	1	0	0	0	20	0	1	0	2	2	2	2	4	0
143	1	1	0	3	0	0	3	2	0	0	2	2	2	1	0	0	0	20	0	1	0	3	2	2	2	4	0
144	0	1	0	3	1	1	3	2	1	1	1	3	3	1	0	0	1	20	0	1	1	3	2	3	3	6	1
145	1	1	0	3	0	0	3	2	0	0	2	3	3	1	0	0	0	20	0	1	0	3	2	3	3	6	0
146	1	1	0	3	1	0	3	2	0	1	2	3	3	1	0	0	0	20	0	1	0	3	2	3	3	6	0
147	0	3	0	2	0	0	3	2	1	0	2	3	2	1	0	0	1	20	0	1	1	3	2	3	2	5	1
148	0	5	0	3	0	1	3	2	0	1	1	3	2	1	0	0	0	20	0	1	0	3	2	3	2	5	0
149	0	3	0	3	0	1	3	3	0	0	2	3	3	1	0	0	0	20	0	1	0	3	3	3	3	6	0
150	0	1	0	3	3	0	3	2	0	1	2	3	3	1	0	0	0	20	0	1	0	3	2	3	3	6	0
151	0	1	0	4	1	0	3	3	0	0	2	3	3	1	0	0	0	20	0	1	0	3	3	3	3	6	0
152	1	1	0	2	4	1	2	2	1	1	1	2	1	1	0	1	0	20	0	1	1	2	2	2	1	3	1
153	0	5	0	3	3	0	3	2	1	1	1	3	2	1	1	0	0	20	0	1	1	3	2	3	2	5	1
154	1	1	0	3	0	0	3	3	0	0	2	3	3	1	0	0	0	20	0	1	0	3	3	3	3	6	0
155	1	4	0	1	0	1	2	1	1	1	1	3	2	1	0	0	0	20	1	1	0	2	1	3	2	5	1
156	0	1	0	1	1	0	2	2	1	0	2	2	2	1	0	0	0	20	0	1	0	2	2	2	2	4	0
157	0	4	0	2	0	0	3	1	0	0	2	3	3	1	0	0	0	20	0	1	0	3	1	3	3	6	0
158	0	1	0	1	4	1	2	1	1	1	1	2	2	1	0	1	0	20	0	1	1	2	1	2	2	4	1
159	1	3	0	3	2	0	3	3	0	0	2	3	3	1	0	0	0	20	0	1	0	3	3	3	3	6	0
160	0	4	0	2	0	1		1	1	1	1	3	3	1	0	0	1	20	0	1	1		1	3	3	6	1
161	0	1	0	3	0	0	3	3	0	0	2	3	3	1	1	0	0	20	0	1	1	3	3	3	3	6	1
162	1	3	0	4	0	0	3	3	0	0	2	3	3	1	0	0	0	20	0	1	0	3	3	3	3	6	0
163	0	4	0	1	0	0	2	1	0	1	2	2	2	1	0	0	0	20	0	1	0	2	1	2	2	4	0
164	1	1	0	3	0	0	3	2	0	1	2	3	3	1	0	0	0	20	0	1	0	3	2	3	3	6	0
165	0	2	0	2	0	0	2	1	0	0	2	2	2	1	1	0	0	20	0	1	1	2	1	2	2	4	1
166	0	2	0	2	3	0	3	1	1	1	1	3	3	1	0	0	1	20	0	1	1	3	1	3	3	6	1
167	0	3	0	1	3	0	1	2	1	0	2	1	2	1	1	0	0	20	0	1	1	1	2	1	2	3	1
168	1	2	0	3	0	0	3	2	0	0	2	2	2	1	0	0	0	20	0	1	0	3	2	2	2	4	0
169	1	5	0	2	1	0	3	2	1	0	2	3	3	1	0	0	0	20	0	1	0	3	2	3	3	6	0
170	0	2	0	2	0	1	2	1	0	1	0	2	2	1	1	0	0	20	0	1	1	2	1	2	2	4	1
171	0	4	0	1	3	0		2	1	1	1	3	3	1	1	0	0	20	0	1	1		2	3	3	6	1
172	0	5	0	1	3	1	2	1	0	1	1	2	2	1	0	0	1	20	0	1	1	2	1	2	2	4	1
173	0	4	0	2	0	0	2	2	1	1	1	2	2	1	0	0	1	20	0	1	1	2	2	2	2	4	1
174	0	1	0	2	0	1	2	2	1	1	1	3	3	1	0	0	1	20	0	1	1	2	2	3	3	6	1
175	0	5	0	2	0	1	3	2	1	1	1	2	2	1	0	0	0	20	0	1	0	3	2	2	2	4	0
176	1	2	0	3	2	0	3	2	0	0	2	2	2	1	0	0	0	20	0	1	0	3	2	2	2	4	0
177	0	1	0	4	0	0	3	2	0	0	2	2	2	1	0	0	0	20	0	1	0	3	2	2	2	4	0
178	0	2	0	3	3	1	2	2	1	1	2	3	3	1	1	0	0	20	0	1	1	2	2	3	3	6	1
179	1	5	0	2	1	0	3	2	1	0	2	3	3	1	0	0	0	20	0	1	0	3	2	3	3	6	0
180	0	4	0	3	0	0		2	0	0	2	3	3	1	0	0	0	20	0	1	0		2	3	3	6	0
181	0	4	0	1	0	1	3	1	1	1	1	3	3	1	0	0	0	20	1	1	0	3	1	3	3	6	1
182	0	4	0	4	0	0	2	1	0	1	2	2	2	1	0	0	1	20	0	1	1	2	1	2	2	4	1
183	1	3	0	3	2	0	3	3	0	0	2	3	3	1	0	0	0	20	0	1	0	3	3	3	3	6	0
184	0	1	0	1	3	0	2	2	1	0	2	2	2	1	1	0	0	20	0	1	1	2	2	2	2	4	1
185	1	5	0	2	2	1	3	2	0	1	1	3	2	1	1	0	0	20	0	1	1	3	2	3	2	5	1
186	0	5	0	2	0	1	3	2	0	0	1	2	2	1	0	0	0	20	0	1	0	3	2	2	2	4	0
187	0	2	0	4	3	0	2	1	1	1	2	2	2	1	0	1	0	20	0	1	1	2	1	2	2	4	1
188	1	5	0	4	1	0	3	3	1	1	2	3	3	1	0	0	0	20	0	1	0	3	3	3	3	6	0
189	0	2	0	4	3	0	1	2	1	1	1	1	2	1	1	0	0	20	0	1	1	1	2	1	2	3	1
190	0	2	0	1	3	0	1	2	1	1	2	2	2	1	1	0	0	19	0	1	1	1	2	2	2	4	1
191	0	5	0	4	1	0	3	3	1	1	2	3	3	1	0	0	0	20	0	1	0	3	3	3	3	6	0
192	0	4	0	3	3	0		1	1	1	1	3	3	1	0	0	1	20	0	1	1		1	3	3	6	1
193	1	1	0	3	0	0	3	3	0	0	2	3	3	1	0	0	0	20	0	1	0	3	3	3	3	6	0
194	1	2	0	3	2	0	3	2	0	0	2	2	2	1	0	0	0	20	0	1	0	3	2	2	2	4	0
195	1	1	0	4	1	0	3	2	0	0	2	2	2	1	0	0	0	20	0	1	0	3	2	2	2	4	0
196	1	1	0	1	0	0	2	2	1	0	1	2	2	1	0	0	1	20	0	1	1	2	2	2	2	4	1
197	0	5	0	2	0	1	2	1	0	0	1	1	2	1	0	0	0	20	0	1	0	2	1	1	2	3	0
198	0	4	0	1	3	0		1	1	0	2	3	3	1	0	0	0	20	0	1	0		1	3	3	6	0
199	0	1	0	4	1	0	3	1	0	0	2	3	2	1	0	0	0	20	0	1	0	3	1	3	2	5	0
200	0	5	0	2	0	1	3	2	0	1	2	2	2	1	0	0	0	20	1	1	0	3	2	2	2	4	1
201	1	2	0	3	0	0	3	2	0	0	2	3	3	1	0	0	0	20	0	1	0	3	2	3	3	6	0
202	1	2	0	3	0	0	3	2	0	1	2	2	2	1	0	0	0	20	0	1	0	3	2	2	2	4	0
203	0	3	0	1	0	1	1	2	1	1	1	1	2	1	0	0	1	20	0	1	1	1	2	1	2	3	1
204	0	1	0	4	1	0	3	3	0	0	2	3	3	1	0	0	0	20	0	1	0	3	3	3	3	6	0
205	0	2	0	4	0	0	3	3	0	0	2	3	3	1	0	0	0	20	0	1	0	3	3	3	3	6	0
206	0	5	0	2	1	0	3	2	1	0	2	3	3	1	0	0	0	20	0	1	0	3	2	3	3	6	0
207	0	2	0	4	3	0	2	1	1	1	2	2	2	1	0	1	0	20	0	1	1	2	1	2	2	4	1
208	1	1	0	1	1	1	2	2	0	1	1	2	2	1	0	0	1	20	0	1	1	2	2	2	2	4	1
209	1	3	0	2	2	0	3	1	0	0	2	3	3	1	0	0	0	20	0	1	0	3	1	3	3	6	0
210	0	4	0	2	0	0	3	1	0	0	2	3	3	1	0	0	0	20	0	1	0	3	1	3	3	6	0
211	1	1	0	1	0	1	2	2	0	0	2	2	2	1	1	0	0	20	0	1	1	2	2	2	2	4	1
212	0	2	0	3	4	0	3	3	0	0	2	3	3	1	0	0	0	20	0	1	0	3	3	3	3	6	0
213	0	4	0	1	0	0		2	0	1	2	3	3	1	0	0	1	20	0	1	1		2	3	3	6	1
214	1	5	0	2	1	0	2	1	1	0	2	2	2	1	0	0	0	20	0	1	0	2	1	2	2	4	0
215	1	2	0	3	0	0	3	2	0	0	2	2	2	1	0	0	0	20	0	1	0	3	2	2	2	4	0
216	0	4	0	3	3	1		1	1	1	2	3	3	1	1	0	0	20	0	1	1		1	3	3	6	1
217	1	4	0	1	2	0	2	1	0	0	2	2	2	1	0	0	0	20	0	1	0	2	1	2	2	4	0
218	1	3	0	2	2	0		2	1	1	2	3	3	1	0	0	1	20	0	1	1		2	3	3	6	1
219	1	5	0	2	3	0	1	2	1	1	1	2	2	1	1	0	0	20	0	1	1	1	2	2	2	4	1
220	1	3	0	1	0	0	2	1	0	0	2	2	2	1	0	0	0	20	0	1	0	2	1	2	2	4	0
221	1	2	0	3	3	0	3	2	0	0	2	3	3	1	0	0	0	20	0	1	0	3	2	3	3	6	0
222	0	3	0	1	3	0	1	2	1	0	2	1	2	1	1	0	0	20	0	1	1	1	2	1	2	3	1
223	1	1	0	2	2	0	2	2	0	0	2	2	2	1	0	0	0	20	0	1	0	2	2	2	2	4	0
224	1	3	0	2	2	0		2	0	0	2	3	3	1	0	0	0	20	0	1	0		2	3	3	6	0
225	1	2	0	3	0	0	3	2	0	0	2	2	2	1	0	0	0	20	0	1	0	3	2	2	2	4	0
226	1	1	0	3	0	0	3	2	0	0	2	3	3	1	0	0	0	20	0	1	0	3	2	3	3	6	0
227	1	3	0	1	1	1	1	2	1	1	1	1	2	1	0	0	1	20	0	1	1	1	2	1	2	3	1
228	1	2	0	4	0	0	3	2	0	0	2	3	2	1	0	0	0	20	0	1	0	3	2	3	2	5	0
229	1	1	0	3	1	0	3	2	0	1	2	3	3	1	0	0	0	20	0	1	0	3	2	3	3	6	0
230	0	1	0	1	3	0	2	2	1	0	2	2	2	1	0	0	0	20	0	1	0	2	2	2	2	4	0
231	0	5	0	1	3	1	2	1	0	1	1	2	2	1	0	0	1	20	0	1	1	2	1	2	2	4	1
232	0	5	0	1	3	1	2	2	0	1	1	2	2	1	0	0	1	20	0	1	1	2	2	2	2	4	1
233	0	5	0	3	1	0	3	3	1	1	2	3	3	1	0	0	0	20	0	1	0	3	3	3	3	6	0
234	0	1	0	3	0	0	3	3	0	1	2	3	3	1	0	0	0	20	0	1	0	3	3	3	3	6	0
235	0	5	0	1	3	1	2	1	0	1	1	2	2	1	0	0	1	20	0	1	1	2	1	2	2	4	1
236	1	1	0	3	0	0	3	3	0	1	2	3	3	1	0	0	0	20	0	1	0	3	3	3	3	6	0
237	0	1	0	4	0	0	3	2	0	0	2	2	2	1	0	0	0	20	0	1	0	3	2	2	2	4	0
238	1	3	0	1	0	0	2	1	0	0	2	2	2	1	0	0	0	20	0	1	0	2	1	2	2	4	0
239	0	2	0	2	3	0	3	2	0	1	2	3	2	1	0	0	1	20	0	1	1	3	2	3	2	5	1
240	1	3	0	1	2	0	1	1	1	0	2	1	1	1	0	0	0	20	0	1	0	1	1	1	1	2	0
241	0	2	0	3	1	0	3	2	0	1	2	2	2	1	0	0	0	20	0	1	0	3	2	2	2	4	0
242	1	1	0	3	2	0	3	2	0	0	2	3	3	1	0	0	0	20	0	1	0	3	2	3	3	6	0
243	0	1	0	4	0	0	3	2	0	0	2	2	2	1	0	0	0	20	0	1	0	3	2	2	2	4	0
244	1	1	0	3	4	0	3	3	0	1	2	3	3	1	0	0	0	20	0	1	0	3	3	3	3	6	0
245	1	2	0	4	0	0	3	3	0	0	2	3	3	1	0	0	0	20	0	1	0	3	3	3	3	6	0
246	1	3	0	2	2	0		2	1	1	2	3	3	1	0	0	1	20	0	1	1		2	3	3	6	1
247	0	3	0	3	4	0	3	3	0	0	2	3	2	1	0	0	0	20	0	1	0	3	3	3	2	5	0
248	1	2	0	2	2	1	3	2	1	1	1	2	2	1	0	0	1	20	0	1	1	3	2	2	2	4	1
249	1	3	0	4	0	0	3	3	0	0	2	3	3	1	0	0	0	20	0	1	0	3	3	3	3	6	0
250	1	1	0	3	2	0	3	1	0	1	2	3	3	1	0	0	0	20	0	1	0	3	1	3	3	6	0
251	0	1	0	3	3	0	3	2	1	0	2	3	3	1	0	0	0	20	0	1	0	3	2	3	3	6	0
252	1	3	0	3	0	0	3	3	0	1	2	3	2	1	1	0	0	20	0	1	1	3	3	3	2	5	1
253	0	1	0	3	0	0	3	2	0	1	2	3	3	1	0	0	0	20	0	1	0	3	2	3	3	6	0
254	0	5	0	2	1	0	2	1	1	0	2	2	2	1	0	0	0	20	0	1	0	2	1	2	2	4	0
255	1	4	0	3	1	0		2	0	1	2	3	3	1	0	0	0	20	0	1	0		2	3	3	6	0
256	1	3	0	3	2	0	3	3	1	0	2	3	3	1	0	0	0	20	0	1	0	3	3	3	3	6	0
257	0	3	0	1	3	0	1	2	1	0	2	1	2	1	1	0	0	20	0	1	1	1	2	1	2	3	1
258	0	2	0	4	0	0	3	3	0	0	2	3	3	1	0	0	0	20	0	1	0	3	3	3	3	6	0
259	1	4	0	3	2	0	3	2	1	1	2	3	3	1	0	0	0	20	0	1	0	3	2	3	3	6	0
260	0	1	0	3	4	0	3	3	0	1	2	3	3	1	0	0	0	20	0	1	0	3	3	3	3	6	0
261	0	5	0	1	1	0	3	3	1	0	2	3	3	1	0	0	0	20	0	1	0	3	3	3	3	6	0
262	0	4	0	2	1	0	2	1	0	0	2	2	1	1	0	0	0	20	0	1	0	2	1	2	1	3	0
263	0	2	0	1	3	0	1	2	1	1	1	2	2	1	1	0	0	20	0	1	1	1	2	2	2	4	1
264	0	4	0	2	3	1	2	1	1	1	1	2	2	1	0	1	0	20	0	1	1	2	1	2	2	4	1
265	1	2	0	3	0	0	3	2	0	1	2	2	2	1	0	0	0	20	0	1	0	3	2	2	2	4	0
266	0	5	0	1	0	1	2	1	0	1	2	2	2	1	0	0	0	20	0	1	0	2	1	2	2	4	0
267	0	5	0	2	0	1	3	2	0	0	1	2	2	1	0	0	0	20	0	1	0	3	2	2	2	4	0
268	1	2	0	3	0	0	3	3	0	0	2	3	3	1	0	0	0	20	0	1	0	3	3	3	3	6	0
269	1	2	0	3	2	0	3	2	0	0	2	2	2	1	0	0	0	20	0	1	0	3	2	2	2	4	0
270	1	3	0	2	2	0	3	1	0	0	2	3	3	1	0	0	0	20	0	1	0	3	1	3	3	6	0
271	0	3	0	1	3	0	1	2	1	1	2	1	2	1	1	0	0	20	0	1	1	1	2	1	2	3	1
272	0	4	0	1	0	1	2	1	0	1	1	3	3	1	0	0	0	20	1	1	0	2	1	3	3	6	1
273	1	4	0	2	2	0	2	2	1	1	2	2	2	1	1	0	0	20	0	1	1	2	2	2	2	4	1
274	0	1	0	2	4	0	2	2	0	0	2	2	2	1	0	0	1	20	0	1	1	2	2	2	2	4	1
275	1	2	0	4	0	0	3	3	0	0	2	3	3	1	0	0	0	20	0	1	0	3	3	3	3	6	0
276	0	1	0	2	3	1	2	2	1	1	2	3	3	1	1	0	0	20	0	1	1	2	2	3	3	6	1
277	0	2	0	2	0	1	3	2	1	1	1	3	2	1	0	0	1	20	0	1	1	3	2	3	2	5	1
278	0	2	0	1	3	0	1	2	1	1	2	2	2	1	1	0	0	20	0	1	1	1	2	2	2	4	1
279	1	2	0	3	2	0	3	3	0	0	2	3	3	1	0	0	0	20	0	1	0	3	3	3	3	6	0
280	1	2	0	4	0	0	3	3	0	0	2	3	3	1	0	0	0	20	0	1	0	3	3	3	3	6	0
281	0	3	0	1	0	0	3	2	1	0	2	3	2	1	1	0	0	20	0	1	1	3	2	3	2	5	1
282	1	5	0	3	1	0	3	2	1	1	2	3	3	1	0	0	0	20	0	1	0	3	2	3	3	6	0
283	0	5	0	1	3	1	2	2	0	1	1	2	2	1	0	0	1	20	0	1	1	2	2	2	2	4	1
284	1	4	0	3	0	0	3	3	0	1	2	3	2	1	1	0	0	20	0	1	1	3	3	3	2	5	1
285	0	2	0	3	0	1	3	3	1	1	1	3	3	1	0	0	1	20	0	1	1	3	3	3	3	6	1
286	0	5	0	1	3	1	2	1	0	1	1	2	2	1	0	0	1	20	0	1	1	2	1	2	2	4	1
287	0	4	0	3	3	1		1	1	1	2	3	3	1	1	0	0	20	0	1	1		1	3	3	6	1
288	1	3	0	3	0	1	3	3	1	1	1	3	3	1	0	0	0	20	1	1	0	3	3	3	3	6	1
289	1	2	0	4	0	0	3	3	0	0	2	3	3	1	0	0	0	20	0	1	0	3	3	3	3	6	0
290	1	4	0	3	2	0	3	2	0	0	2	3	2	1	0	0	0	20	0	1	0	3	2	3	2	5	0
291	0	1	0	2	3	1	2	2	1	1	2	3	3	1	1	0	0	20	0	1	1	2	2	3	3	6	1
292	0	1	0	2	4	0	2	2	0	0	2	2	2	1	0	0	1	20	0	1	1	2	2	2	2	4	1
293	1	4	0	2	0	1	2	1	1	0	2	2	1	1	0	0	0	20	0	1	0	2	1	2	1	3	0
294	0	3	0	3	0	1	3	2	1	1	1	3	2	1	0	0	0	20	1	1	0	3	2	3	2	5	1
295	1	3	0	3	2	0	3	3	0	0	2	3	3	1	0	0	0	20	0	1	0	3	3	3	3	6	0
296	1	1	0	4	0	0	3	3	0	0	2	3	3	1	0	0	0	20	0	1	0	3	3	3	3	6	0
297	1	4	0	3	2	0	3	2	0	1	2	3	3	1	0	0	0	20	0	1	0	3	2	3	3	6	0
298	1	2	0	4	0	0	3	3	0	0	2	3	3	1	0	0	0	20	0	1	0	3	3	3	3	6	0
299	0	2	0	3	3	1	3	2	1	1	2	3	3	1	1	0	0	20	0	1	1	3	2	3	3	6	1
300	1	3	0	2	1	1	2	1	0	1	1	2	1	1	0	0	1	20	0	1	1	2	1	2	1	3	1
301	0	5	0	2	0	1	3	2	0	1	2	2	2	1	0	0	0	20	1	1	0	3	2	2	2	4	1
302	0	2	0	2	0	1	3	2	1	1	1	3	2	1	0	0	1	20	0	1	1	3	2	3	2	5	1
303	0	2	0	3	3	1	3	2	1	1	2	3	3	1	1	0	0	20	0	1	1	3	2	3	3	6	1
304	0	1	0	1	3	0	4	2	1	0	2	3	3	1	0	0	0	20	0	1	0	3	2	3	3	6	0
305	1	5	0	3	1	0	3	3	1	1	2	3	3	1	0	0	0	20	0	1	0	3	3	3	3	6	0
306	0	5	0	1	0	1	2	1	0	0	2	2	2	1	0	0	0	20	0	1	0	2	1	2	2	4	0
307	0	2	0	4	0	0	3	3	0	0	2	3	3	1	0	0	0	20	0	1	0	3	3	3	3	6	0
308	0	4	0	1	3	0		1	1	0	2	3	3	1	0	0	0	20	0	1	0		1	3	3	6	0
309	1	3	0	1	0	0	2	1	0	0	2	2	2	1	0	0	0	20	0	1	0	2	1	2	2	4	0
310	1	4	0	3	2	1	3	2	0	1	2	3	2	1	0	0	0	20	0	1	0	3	2	3	2	5	0
311	0	2	0	4	3	0	2	1	1	1	2	2	2	1	0	1	0	20	0	1	1	2	1	2	2	4	1
312	0	4	0	2	3	1		1	1	1	1	3	3	1	0	0	1	20	0	1	1		1	3	3	6	1
313	1	4	0	2	0	1	2	1	1	0	2	2	1	1	0	0	0	20	0	1	0	2	1	2	1	3	0
314	1	1	0	4	2	0	3	2	1	0	2	2	2	1	0	0	0	20	0	1	0	3	2	2	2	4	0
315	1	5	0	3	0	1	3	2	1	1	2	3	3	1	0	0	0	20	0	1	0	3	2	3	3	6	0
316	1	2	0	4	0	0	3	3	0	0	2	3	3	1	0	0	0	20	0	1	0	3	3	3	3	6	0
317	1	1	0	4	0	0	3	2	0	0	2	2	2	1	0	0	0	20	0	1	0	3	2	2	2	4	0
318	0	4	0	3	3	1		1	1	1	2	3	3	1	1	0	0	20	0	1	1		1	3	3	6	1
319	0	4	0	1	0	1	2	1	0	1	1	3	2	1	0	0	0	20	1	1	0	2	1	3	2	5	1
320	1	1	0	3	0	0	3	2	0	0	2	3	3	1	0	0	0	20	0	1	0	3	2	3	3	6	0
321	1	4	0	2	1	1		1	1	1	1	3	3	1	0	0	1	20	0	1	1		1	3	3	6	1
322	1	5	0	3	1	0	2	2	1	0	2	2	2	1	0	0	0	20	0	1	0	2	2	2	2	4	0
323	0	4	0	2	0	1		1	1	1	1	3	3	1	0	0	1	20	0	1	1		1	3	3	6	1
324	1	1	0	3	0	0	3	2	0	1	2	3	3	1	0	0	0	20	0	1	0	3	2	3	3	6	0
325	0	4	0	1	0	1	2	1	0	1	1	3	3	1	0	0	0	20	1	1	0	2	1	3	3	6	1
326	0	3	0	2	0	1		2	1	1	1	3	3	1	0	0	1	20	0	1	1		2	3	3	6	1
327	0	4	0	2	3	0		1	1	0	1	3	3	1	1	0	0	20	0	1	1		1	3	3	6	1
328	0	4	0	2	0	0	3	1	0	0	2	3	2	1	0	0	0	20	0	1	0	3	1	3	2	5	0
329	0	5	0	2	4	0	3	2	0	0	2	2	2	1	0	0	0	20	0	1	0	3	2	2	2	4	0
330	0	4	0	2	0	0		1	0	1	2	3	3	1	0	0	1	20	0	1	1		1	3	3	6	1
331	1	3	0	4	0	0	3	3	0	0	2	3	3	1	0	0	0	20	0	1	0	3	3	3	3	6	0
332	0	5	0	2	0	1	3	2	1	1	1	2	2	1	1	0	0	20	0	1	1	3	2	2	2	4	1
333	1	3	0	2	2	0		2	0	0	2	3	3	1	0	0	0	20	0	1	0		2	3	3	6	0
334	1	3	0	3	2	0	3	3	0	0	2	3	3	1	0	0	0	20	0	1	0	3	3	3	3	6	0
335	0	2	0	3	1	1	3	3	1	1	2	2	2	1	0	0	0	20	0	1	0	3	3	2	2	4	0
336	0	2	0	3	1	0	3	2	0	1	2	2	2	1	0	0	0	20	0	1	0	3	2	2	2	4	0
337	0	3	0	3	0	1	3	2	1	1	1	3	2	1	0	0	0	20	1	1	0	3	2	3	2	5	1
338	0	3	0	3	0	0	2	3	0	0	2	3	3	1	0	0	0	20	0	1	0	2	3	3	3	6	0
339	0	4	0	1	3	0		2	0	1	2	3	3	1	0	0	1	20	0	1	1		2	3	3	6	1
340	1	3	0	4	0	0	3	3	0	0	2	3	3	1	0	0	0	20	0	1	0	3	3	3	3	6	0
341	0	2	0	2	3	1	3	2	0	0	2	2	2	1	1	0	0	20	0	1	1	3	2	2	2	4	1
342	1	1	0	2	2	1	2	2	0	0	2	2	2	1	1	0	0	20	0	1	1	2	2	2	2	4	1
343	0	4	0	3	0	1		2	1	1	2	3	3	1	0	0	0	20	0	1	0		2	3	3	6	0
344	0	2	0	4	3	1	1	2	0	0	2	1	2	1	1	0	0	20	0	1	1	1	2	1	2	3	1
345	0	5	0	2	0	1	3	2	1	1	1	2	2	1	0	0	0	20	0	1	0	3	2	2	2	4	0
346	1	1	0	3	0	0	3	1	0	0	2	3	3	1	0	0	0	20	0	1	0	3	1	3	3	6	0
347	0	2	0	2	3	0	2	1	1	1	2	2	2	1	0	1	0	20	0	1	1	2	1	2	2	4	1
348	1	2	0	3	0	0	3	2	0	0	2	2	2	1	0	0	0	20	0	1	0	3	2	2	2	4	0
349	1	3	0	1	2	0	1	1	1	0	2	1	1	1	0	0	0	20	0	1	0	1	1	1	1	2	0
350	1	4	0	1	2	0	2	1	0	0	2	2	2	1	0	0	0	20	0	1	0	2	1	2	2	4	0
351	1	1	0	3	0	0	3	2	1	0	2	3	3	1	0	0	0	20	0	1	0	3	2	3	3	6	0
352	1	4	0	3	2	0	3	2	0	0	2	3	2	1	0	0	0	20	0	1	0	3	2	3	2	5	0
353	1	2	0	3	0	0	3	2	0	0	2	2	2	1	0	0	0	20	0	1	0	3	2	2	2	4	0
354	1	1	0	3	0	0	3	3	0	0	2	3	3	1	0	0	0	20	0	1	0	3	3	3	3	6	0
355	0	4	0	2	0	1		1	1	1	1	3	3	1	0	0	1	20	0	1	1		1	3	3	6	1
356	1	3	0	4	0	1	3	3	0	0	2	3	3	1	0	0	0	20	0	1	0	3	3	3	3	6	0
357	0	1	0	1	3	0	2	2	1	1	2	2	2	1	1	0	0	20	0	1	1	2	2	2	2	4	1
358	1	4	0	3	2	0	3	2	0	1	2	3	3	1	0	0	0	20	0	1	0	3	2	3	3	6	0
359	1	3	0	2	0	0	2	1	0	0	2	2	2	1	0	0	0	20	0	1	0	2	1	2	2	4	0
360	1	1	0	3	0	0	3	3	1	1	2	4	2	1	1	0	0	20	0	1	1	3	3	3	2	5	1
361	0	5	0	1	1	0	2	1	1	0	2	2	2	1	0	0	0	20	0	1	0	2	1	2	2	4	0
362	1	1	0	1	1	1	2	2	0	1	1	2	2	1	0	0	1	20	0	1	1	2	2	2	2	4	1
363	0	4	0	2	3	0		1	1	1	1	3	3	1	1	0	0	20	0	1	1		1	3	3	6	1
364	1	2	0	4	0	0	3	3	0	0	2	3	3	1	0	0	0	20	0	1	0	3	3	3	3	6	0
365	1	2	0	3	2	0	3	2	0	0	2	2	2	1	0	0	0	20	0	1	0	3	2	2	2	4	0
366	0	1	0	3	3	0	3	3	1	0	2	3	3	1	1	0	0	20	0	1	1	3	3	3	3	6	1
367	0	4	0	1	3	0		2	1	0	1	3	3	1	1	0	0	20	0	1	1		2	3	3	6	1
368	1	2	0	3	0	0	3	2	0	0	2	3	3	1	0	0	0	20	0	1	0	3	2	3	3	6	0
369	1	4	0	3	3	0	2	2	0	0	2	2	2	1	0	0	0	20	0	1	0	2	2	2	2	4	0
370	0	3	0	2	0	0	3	3	0	0	2	2	3	1	1	0	0	20	0	1	1	3	3	2	3	5	1
371	0	3	0	1	0	0	3	2	1	0	2	3	2	1	1	0	0	20	0	1	1	3	2	3	2	5	1
372	1	3	0	3	0	0	3	3	0	1	2	3	2	1	1	0	0	20	0	1	1	3	3	3	2	5	1
373	1	3	0	2	0	0	2	1	0	0	2	2	2	1	0	0	0	20	0	1	0	2	1	2	2	4	0
374	0	1	0	1	3	0	2	2	0	1	1	2	2	1	1	0	0	20	0	1	1	2	2	2	2	4	1
375	0	3	0	3	3	1	3	3	1	1	2	3	3	1	1	0	0	20	0	1	1	3	3	3	3	6	1
376	1	4	0	1	2	0	2	1	0	0	2	2	2	1	0	0	0	20	0	1	0	2	1	2	2	4	0
377	1	1	0	4	0	0	3	2	0	0	2	2	2	1	0	0	0	20	0	1	0	3	2	2	2	4	0
378	1	2	0	1	0	1	2	2	0	1	2	2	2	1	1	0	0	20	0	1	1	2	2	2	2	4	1
379	1	3	0	3	1	0	4	1	0	0	2	4	4	1	0	0	0	20	0	1	0	3	1	3	3	6	0
380	0	4	0	1	0	1	3	1	1	1	1	3	3	1	0	0	0	20	1	1	0	3	1	3	3	6	1
381	0	1	0	1	3	0	2	2	0	0	2	2	2	1	1	0	0	20	0	1	1	2	2	2	2	4	1
382	0	2	0	3	3	1	2	3	1	1	2	3	3	1	1	0	0	20	0	1	1	2	3	3	3	6	1
383	0	1	0	3	0	0	4	2	1	1	2	4	2	1	1	0	0	20	0	1	1	3	2	3	2	5	1
384	1	1	0	3	0	0	3	2	1	0	2	3	3	1	0	0	0	20	0	1	0	3	2	3	3	6	0
385	0	4	0	3	1	0	3	2	0	0	2	3	2	1	0	0	0	20	0	1	0	3	2	3	2	5	0
386	0	5	0	2	0	1	2	1	0	0	1	2	2	1	0	0	0	20	0	1	0	2	1	2	2	4	0
387	1	4	0	1	0	0	2	1	0	1	2	2	2	1	0	0	0	20	0	1	0	2	1	2	2	4	0
388	0	1	0	2	0	0	3	1	1	1	1	3	2	1	0	0	1	14	0	1	1	3	1	3	2	5	1
389	1	3	0	2	2	0		2	0	0	2	3	3	1	0	0	0	20	0	1	0		2	3	3	6	0
390	1	4	0	2	2	0	2	1	1	1	2	2	2	1	1	0	0	20	0	1	1	2	1	2	2	4	1
391	1	3	0	2	0	0		2	0	0	2	3	3	1	0	0	0	20	0	1	0		2	3	3	6	0
392	1	1	0	3	2	0	3	2	0	0	2	3	3	1	0	0	0	20	0	1	0	3	2	3	3	6	0
393	1	3	0	2	2	0	3	1	0	0	2	3	3	1	0	0	0	20	0	1	0	3	1	3	3	6	0
394	0	4	0	2	0	0	3	2	0	0	2	3	2	1	0	0	0	20	0	1	0	3	2	3	2	5	0
395	0	1	0	1	3	0	2	2	0	1	1	2	2	1	1	0	0	20	0	1	1	2	2	2	2	4	1
396	0	4	0	1	0	0		2	0	1	2	3	3	1	0	0	1	20	0	1	1		2	3	3	6	1
397	1	3	0	3	1	0	3	3	0	0	2	3	3	1	0	0	0	20	0	1	0	3	3	3	3	6	0
398	0	4	0	2	0	0	3	1	0	0	2	3	2	1	0	0	0	20	0	1	0	3	1	3	2	5	0
399	1	3	0	2	3	0	2	1	0	1	2	2	2	1	0	0	0	20	0	1	0	2	1	2	2	4	0
400	1	4	0	2	2	0	2	1	0	1	2	2	1	1	0	0	1	20	0	1	1	2	1	2	1	3	1
401	1	1	0	1	0	0	2	2	1	0	1	2	2	1	0	0	1	20	0	1	1	2	2	2	2	4	1
402	0	4	0	3	3	1		1	1	1	2	3	3	1	1	0	0	20	0	1	1		1	3	3	6	1
403	1	2	0	1	4	0	3	2	1	1	1	2	1	1	0	1	0	20	0	1	1	3	2	2	1	3	1
404	1	2	0	3	0	0	3	2	0	0	2	2	2	1	0	0	0	20	0	1	0	3	2	2	2	4	0
405	1	2	0	2	2	0	4	2	1	1	2	3	2	1	0	0	1	20	0	1	1	3	2	3	2	5	1
406	1	1	0	3	0	0	3	3	0	0	2	2	2	1	0	0	0	20	0	1	0	3	3	2	2	4	0
407	1	4	0	2	4	1		2	1	1	1	3	3	1	0	1	0	20	0	1	1		2	3	3	6	1
408	0	2	0	3	3	1	3	2	1	1	2	3	3	1	1	0	0	20	0	1	1	3	2	3	3	6	1
409	0	2	0	3	3	1	3	2	1	1	2	3	3	1	1	0	0	20	1	1	1	3	2	3	3	6	2
410	0	2	0	1	3	0	1	2	1	1	1	2	2	1	0	1	0	20	0	1	1	1	2	2	2	4	1
411	1	1	0	3	1	1	2	2	1	1	1	3	3	1	0	0	1	20	0	1	1	2	2	3	3	6	1
412	1	3	0	3	1	0	3	3	0	0	2	3	3	1	0	0	0	20	0	1	0	3	3	3	3	6	0
413	1	2	0	4	0	0	3	3	1	0	2	3	3	1	0	0	0	20	0	1	0	3	3	3	3	6	0
414	1	1	0	4	2	0	3	2	0	0	2	3	2	1	0	0	0	20	0	1	0	3	2	3	2	5	0
415	0	1	0	3	0	0	3	3	0	0	2	3	3	1	1	0	0	20	0	1	1	3	3	3	3	6	1
416	0	5	0	2	1	0	3	2	1	0	2	3	3	1	0	0	0	20	0	1	0	3	2	3	3	6	0
417	1	5	0	3	3	0	3	2	0	1	2	3	3	1	0	0	0	20	0	1	0	3	2	3	3	6	0
418	1	4	0	1	1	1		2	1	1	1	3	3	1	0	0	1	20	0	1	1		2	3	3	6	1
419	1	3	0	1	0	0	2	2	0	0	2	2	2	1	0	0	0	20	0	1	0	2	2	2	2	4	0
420	0	2	0	2	0	0	3	2	1	1	2	3	2	1	0	0	1	20	0	1	1	3	2	3	2	5	1
421	0	1	0	4	1	0	3	3	0	0	2	3	3	1	0	0	0	20	0	1	0	3	3	3	3	6	0
422	1	2	0	3	0	0	3	2	1	0	2	3	3	1	0	0	0	20	0	1	0	3	2	3	3	6	0
423	0	3	0	2	4	1		2	1	1	0	3	3	1	0	1	0	20	0	1	1		2	3	3	6	1
424	1	1	0	3	0	0	3	2	0	1	2	3	3	1	0	0	0	20	0	1	0	3	2	3	3	6	0
425	0	3	0	1	3	0	1	2	1	0	2	1	2	1	1	0	0	20	0	1	1	1	2	1	2	3	1
426	0	4	0	1	1	0	3	2	0	0	2	2	1	1	0	0	0	20	0	1	0	3	2	2	1	3	0
427	1	1	0	4	2	0	3	3	1	0	2	3	3	1	0	0	0	20	0	1	0	3	3	3	3	6	0
428	0	4	0	2	0	0	2	2	1	0	1	2	2	1	0	0	1	20	0	1	1	2	2	2	2	4	1
429	1	2	0	3	0	0	3	2	0	0	2	2	2	1	0	0	0	20	0	1	0	3	2	2	2	4	0
430	0	2	0	1	3	0	2	2	1	0	2	2	2	1	0	0	0	20	0	1	0	2	2	2	2	4	0
431	0	4	0	3	0	1		1	1	1	1	3	3	1	0	0	1	20	0	1	1		1	3	3	6	1
432	0	4	0	1	0	0	3	3	0	1	2	3	2	1	0	0	1	20	0	1	1	3	3	3	2	5	1
433	1	1	0	3	0	1	3	2	0	1	2	3	3	1	0	0	0	20	0	1	0	3	2	3	3	6	0
434	0	4	0	3	3	1		1	1	1	2	3	3	1	1	0	0	20	0	1	1		1	3	3	6	1
435	1	4	0	3	2	0	3	2	0	1	2	3	3	1	0	0	0	20	0	1	0	3	2	3	3	6	0
436	1	4	0	2	2	0	3	2	0	0	2	3	2	1	0	0	0	20	0	1	0	3	2	3	2	5	0
437	0	4	0	3	0	0		2	0	0	2	3	3	1	0	0	0	20	0	1	0		2	3	3	6	0
438	1	4	0	2	2	0	2	1	1	1	2	2	2	1	1	0	0	20	0	1	1	2	1	2	2	4	1
439	1	3	0	3	0	0	3	3	0	0	2	3	3	1	0	0	0	20	0	1	0	3	3	3	3	6	0
440	1	4	0	1	2	0	1	1	0	0	2	2	2	1	0	0	0	20	0	1	0	1	1	2	2	4	0
441	0	4	0	3	4	1	2	1	1	1	1	2	2	1	0	0	1	20	0	1	1	2	1	2	2	4	1
442	0	3	0	1	1	1	1	2	1	1	1	1	2	1	0	0	1	20	0	1	1	1	2	1	2	3	1
443	0	4	0	3	2	0	3	2	0	0	2	3	2	1	0	0	0	20	0	1	0	3	2	3	2	5	0
444	1	2	0	3	0	0	3	2	0	0	2	3	3	1	0	0	0	20	0	1	0	3	2	3	3	6	0
445	0	4	0	3	1	0	2	2	1	0	2	2	2	1	0	0	0	20	0	1	0	2	2	2	2	4	0
446	1	2	0	3	0	0	3	2	0	0	2	3	3	1	0	0	0	20	0	1	0	3	2	3	3	6	0
447	0	3	0	1	3	0	1	2	1	1	2	1	2	1	1	0	0	20	0	1	1	1	2	1	2	3	1
448	1	2	0	3	0	0	3	3	0	0	2	3	2	1	1	0	0	20	0	1	1	3	3	3	2	5	1
449	0	3	0	1	0	0	1	2	0	1	2	1	2	1	1	0	0	20	0	1	1	1	2	1	2	3	1
450	0	4	0	3	3	1		1	1	1	2	3	3	1	1	0	0	20	0	1	1		1	3	3	6	1
451	1	3	0	3	2	0	3	3	0	0	2	3	3	1	0	0	0	20	0	1	0	3	3	3	3	6	0
452	1	4	0	2	2	0	1	2	0	0	2	2	2	1	0	0	0	20	0	1	0	1	2	2	2	4	0
453	0	1	0	2	3	1	2	2	1	1	2	3	3	1	1	0	0	20	0	1	1	2	2	3	3	6	1
454	0	4	0	1	3	0		2	0	1	2	3	3	1	0	0	1	20	0	1	1		2	3	3	6	1
455	0	4	0	3	3	1		1	1	1	2	3	3	1	1	0	0	20	0	1	1		1	3	3	6	1
456	0	4	0	2	0	1		1	1	1	1	3	3	1	0	0	1	20	0	1	1		1	3	3	6	1
457	0	3	0	1	3	0	3	3	1	0	2	3	3	1	1	0	0	20	0	1	1	3	3	3	3	6	1
458	0	4	0	2	0	1		1	1	1	1	3	3	1	0	0	1	20	0	1	1		1	3	3	6	1
459	0	2	0	2	0	1	3	2	0	0	2	2	2	1	1	0	0	20	0	1	1	3	2	2	2	4	1
460	0	1	0	4	1	0	3	1	0	0	2	3	2	1	0	0	0	20	0	1	0	3	1	3	2	5	0
461	0	1	0	4	0	0	3	2	0	0	2	2	2	1	0	0	0	20	0	1	0	3	2	2	2	4	0
462	1	4	0	2	1	1		1	1	1	1	3	3	1	0	0	1	20	0	1	1		1	3	3	6	1
463	0	4	0	1	3	0		2	0	1	2	3	3	1	0	0	1	20	0	1	1		2	3	3	6	1
464	0	1	0	2	0	1	2	2	1	1	1	3	3	1	0	0	1	20	0	1	1	2	2	3	3	6	1
465	1	4	0	2	2	0	2	1	0	1	2	2	1	1	0	0	1	20	0	1	1	2	1	2	1	3	1
466	1	4	0	3	2	0	3	2	0	1	2	3	3	1	0	0	0	20	0	1	0	3	2	3	3	6	0
467	1	4	0	1	2	0	2	1	0	0	2	2	2	1	0	0	0	20	0	1	0	2	1	2	2	4	0
468	1	2	0	2	2	1	3	2	1	1	1	2	2	1	0	0	1	20	0	1	1	3	2	2	2	4	1
469	0	3	0	4	3	1	1	2	0	1	1	2	3	1	0	0	1	20	0	1	1	1	2	2	3	5	1
470	0	2	0	3	0	1	3	3	1	1	1	3	3	1	0	0	1	20	0	1	1	3	3	3	3	6	1
471	1	2	0	3	0	0	3	2	0	0	2	2	2	1	0	0	0	20	0	1	0	3	2	2	2	4	0
472	0	4	0	1	3	0		1	1	0	2	3	3	1	0	0	0	20	0	1	0		1	3	3	6	0
473	1	4	0	2	4	0	2	2	0	0	2	2	1	1	0	0	0	20	0	1	0	2	2	2	1	3	0
474	0	1	0	1	3	0	2	2	1	0	2	2	2	1	1	0	0	20	0	1	1	2	2	2	2	4	1
475	1	3	0	4	0	0	3	3	0	0	2	3	3	1	0	0	0	20	0	1	0	3	3	3	3	6	0
476	1	1	0	4	0	0	3	2	0	0	2	2	2	1	0	0	0	20	0	1	0	3	2	2	2	4	0
477	1	2	0	3	2	0	3	2	0	0	2	2	2	1	0	0	0	20	0	1	0	3	2	2	2	4	0
478	0	4	0	1	0	0		2	0	1	2	3	3	1	0	0	1	20	0	1	1		2	3	3	6	1
479	0	4	0	2	0	1		1	1	1	1	3	3	1	0	0	1	20	0	1	1		1	3	3	6	1
480	1	1	0	3	0	0	3	3	0	1	2	3	3	1	0	0	0	20	0	1	0	3	3	3	3	6	0
481	0	1	0	3	0	0	3	2	0	1	2	3	3	1	0	0	0	20	0	1	0	3	2	3	3	6	0
482	1	1	0	4	2	0	3	2	0	0	2	3	2	1	0	0	0	20	0	1	0	3	2	3	2	5	0
483	1	2	0	4	0	0	3	3	0	0	2	3	3	1	0	0	0	20	0	1	0	3	3	3	3	6	0
484	0	4	0	2	3	1	2	1	1	1	1	2	2	1	0	1	0	20	0	1	1	2	1	2	2	4	1
485	1	3	0	1	2	0	1	1	1	0	2	1	1	1	0	0	0	20	0	1	0	1	1	1	1	2	0
486	0	4	0	3	1	0	3	2	0	1	2	3	3	1	0	0	0	20	0	1	0	3	2	3	3	6	0
487	0	2	0	1	4	0	3	1	1	1	2	3	2	1	0	1	0	20	0	1	1	3	1	3	2	5	1
488	1	4	0	3	3	0	2	2	0	1	2	2	1	1	0	0	0	20	0	1	0	2	2	2	1	3	0
489	0	4	0	1	3	0		1	1	0	1	3	3	1	1	0	0	20	0	1	1		1	3	3	6	1
490	0	2	0	3	3	0	3	2	1	0	2	3	3	1	1	0	0	20	0	1	1	3	2	3	3	6	1
491	0	4	0	3	3	0		1	1	1	1	3	3	1	0	0	1	20	0	1	1		1	3	3	6	1
492	0	4	0	1	0	0	3	1	1	0	2	3	2	1	1	0	0	20	0	1	1	3	1	3	2	5	1
493	0	4	0	3	0	1		1	1	1	1	3	3	1	0	0	1	20	0	1	1		1	3	3	6	1
494	0	4	0	2	0	1		1	1	1	1	3	3	1	0	0	1	20	0	1	1		1	3	3	6	1
495	1	3	0	3	0	0	3	2	0	0	2	4	2	1	0	0	0	20	0	1	0	3	2	3	2	5	0
496	1	1	0	4	2	0	3	1	0	0	2	3	2	1	0	0	0	20	0	1	0	3	1	3	2	5	0
497	0	2	0	1	3	0	1	2	1	0	1	2	2	1	0	1	0	20	0	1	1	1	2	2	2	4	1
498	1	5	0	2	4	0	3	2	0	0	2	3	3	1	0	0	0	20	0	1	0	3	2	3	3	6	0
499	1	1	0	3	0	0	3	2	0	0	2	2	2	1	0	0	0	20	0	1	0	3	2	2	2	4	0
500	1	4	0	2	2	0	1	2	0	0	2	2	2	1	0	0	0	20	0	1	0	1	2	2	2	4	0
501	0	4	0	1	3	0		2	1	0	1	3	3	1	1	0	0	20	0	1	1		2	3	3	6	1
502	1	3	0	3	2	0	3	3	0	0	2	3	3	1	0	0	0	20	0	1	0	3	3	3	3	6	0
503	1	2	0	3	2	0	3	2	0	0	2	2	2	1	0	0	0	20	0	1	0	3	2	2	2	4	0
504	0	2	0	3	1	1	2	1	1	1	1	2	3	1	0	0	1	20	0	1	1	2	1	2	3	5	1
505	0	5	0	3	3	0	3	2	1	1	1	3	2	1	1	0	0	20	0	1	1	3	2	3	2	5	1
506	1	4	0	3	0	0	3	2	0	0	2	3	2	1	0	0	0	20	0	1	0	3	2	3	2	5	0
507	0	4	0	1	0	1	2	1	0	0	1	2	2	1	0	0	0	20	0	1	0	2	1	2	2	4	0
508	0	3	0	3	3	1	3	3	1	1	2	3	3	1	1	0	0	20	0	1	1	3	3	3	3	6	1
509	0	1	0	2	4	0	2	2	0	0	2	2	2	1	0	0	1	20	0	1	1	2	2	2	2	4	1
510	1	4	0	1	2	0	1	1	0	0	2	2	2	1	0	0	0	20	0	1	0	1	1	2	2	4	0
511	1	2	0	3	2	0	3	3	1	0	2	3	3	1	0	0	0	20	0	1	0	3	3	3	3	6	0
512	0	4	0	1	0	1	2	1	0	1	1	2	2	1	0	0	0	20	0	1	0	2	1	2	2	4	0
513	1	4	0	2	2	0	2	1	1	1	1	2	1	1	0	0	1	20	0	1	1	2	1	2	1	3	1
514	1	3	0	1	4	0	1	2	1	1	1	1	2	1	0	1	0	20	0	1	1	1	2	1	2	3	1
515	1	1	0	3	2	0	3	2	0	0	2	3	3	1	0	0	0	20	0	1	0	3	2	3	3	6	0
516	1	4	0	3	2	0	3	2	0	1	2	3	3	1	0	0	0	20	0	1	0	3	2	3	3	6	0
517	1	3	0	4	0	0	3	3	0	0	2	3	3	1	0	0	0	20	0	1	0	3	3	3	3	6	0
518	1	1	0	4	2	0	3	2	1	0	2	2	2	1	0	0	0	20	0	1	0	3	2	2	2	4	0
519	1	4	0	2	3	0	1	2	0	0	2	2	2	1	0	0	0	20	0	1	0	1	2	2	2	4	0
520	1	2	0	2	2	0	4	2	1	1	2	3	2	1	0	0	1	20	0	1	1	3	2	3	2	5	1
521	1	4	0	1	1	1		2	1	1	1	3	3	1	0	0	1	20	0	1	1		2	3	3	6	1
522	0	1	0	4	1	0	4	4	0	0	2	3	3	1	1	0	0	20	0	1	1	3	3	3	3	6	1
523	0	4	0	4	0	0		1	0	1	2	3	3	1	0	0	1	20	0	1	1		1	3	3	6	1
524	0	2	0	2	0	1	3	2	1	1	1	3	2	1	0	0	1	20	0	1	1	3	2	3	2	5	1
525	1	3	0	4	0	0	3	3	0	0	2	3	3	1	0	0	0	20	0	1	0	3	3	3	3	6	0
526	1	5	0	2	1	0	3	2	1	1	2	2	2	1	0	0	0	20	0	1	0	3	2	2	2	4	0
527	1	1	0	3	2	0	3	2	0	0	2	3	3	1	0	0	0	20	0	1	0	3	2	3	3	6	0
528	1	2	0	3	2	0	3	3	1	0	2	3	3	1	0	0	0	20	0	1	0	3	3	3	3	6	0
529	1	4	0	3	3	0	2	2	0	0	2	2	1	1	0	0	0	20	0	1	0	2	2	2	1	3	0
530	0	2	0	4	0	0	3	3	0	0	2	3	3	1	0	0	0	20	0	1	0	3	3	3	3	6	0
531	1	1	0	3	0	0	3	3	0	0	2	2	2	1	0	0	0	20	0	1	0	3	3	2	2	4	0
532	0	4	0	1	0	0		2	0	1	2	3	3	1	0	0	1	20	0	1	1		2	3	3	6	1
533	0	3	0	2	0	0	3	3	0	0	2	3	3	1	1	0	0	20	0	1	1	3	3	3	3	6	1
534	0	4	0	3	3	1		1	1	1	2	3	3	1	1	0	0	20	0	1	1		1	3	3	6	1
535	0	1	0	1	1	0	2	2	0	0	2	2	2	1	0	0	0	20	0	1	0	2	2	2	2	4	0
536	0	4	0	1	3	0		1	1	0	2	3	3	1	0	0	0	20	0	1	0		1	3	3	6	0
537	0	3	0	2	0	1		2	0	1	2	3	3	1	1	0	0	20	0	1	1		2	3	3	6	1
538	0	5	0	3	4	1	1	1	0	1	1	1	2	1	0	0	1	20	0	1	1	1	1	1	2	3	1
539	1	3	0	3	2	0	3	3	0	0	2	3	2	1	0	0	0	20	0	1	0	3	3	3	2	5	0
540	0	4	0	2	0	1		1	1	1	1	3	3	1	0	0	1	20	0	1	1		1	3	3	6	1
541	1	1	0	3	2	0	3	2	0	1	2	3	3	1	0	0	0	20	0	1	0	3	2	3	3	6	0
542	0	1	0	2	4	0	2	2	0	0	2	2	2	1	0	0	1	20	0	1	1	2	2	2	2	4	1
543	1	1	0	3	2	0	3	2	0	0	2	3	3	1	0	0	0	20	0	1	0	3	2	3	3	6	0
544	1	4	0	1	0	0	2	1	0	1	2	2	2	1	0	0	0	20	0	1	0	2	1	2	2	4	0
545	0	1	0	2	0	1	2	2	1	1	1	3	3	1	0	0	1	20	0	1	1	2	2	3	3	6	1
546	0	1	0	2	0	1	2	2	1	1	1	3	3	1	0	0	1	20	0	1	1	2	2	3	3	6	1
547	0	4	0	3	3	0		1	0	1	2	3	3	1	0	0	0	20	0	1	0		1	3	3	6	0
548	1	3	0	3	2	0	3	3	0	0	2	3	3	1	0	0	0	20	0	1	0	3	3	3	3	6	0
549	0	1	0	3	1	0	3	3	0	0	2	3	3	1	0	0	0	20	0	1	0	3	3	3	3	6	0
550	0	4	0	4	0	1		1	1	1	1	3	3	1	0	0	1	20	0	1	1		1	3	3	6	1
551	0	1	0	2	0	1	2	2	1	1	1	3	3	1	0	0	1	20	0	1	1	2	2	3	3	6	1
552	0	5	0	2	0	1	3	2	1	0	1	2	2	1	0	0	0	20	0	1	0	3	2	2	2	4	0
553	1	5	0	2	2	1	3	2	0	1	1	3	2	1	1	0	0	20	0	1	1	3	2	3	2	5	1
554	1	2	0	3	1	1	3	1	1	1	1	3	2	1	0	0	1	20	0	1	1	3	1	3	2	5	1
555	0	4	0	2	3	0		1	1	0	1	3	3	1	1	0	0	20	0	1	1		1	3	3	6	1
556	1	1	0	3	2	0	3	2	0	0	2	3	3	1	0	0	0	20	0	1	0	3	2	3	3	6	0
557	1	1	0	4	2	0	3	1	0	0	2	3	2	1	0	0	0	20	0	1	0	3	1	3	2	5	0
558	0	2	0	3	1	0	3	2	0	1	2	2	2	1	0	0	0	20	0	1	0	3	2	2	2	4	0
559	1	4	0	3	0	0	3	2	0	0	2	3	2	1	0	0	0	20	0	1	0	3	2	3	2	5	0
560	1	2	0	3	4	0	3	3	0	0	2	3	3	1	0	0	0	20	0	1	0	3	3	3	3	6	0
561	1	1	0	3	0	0	3	3	0	1	2	3	3	1	0	0	0	20	0	1	0	3	3	3	3	6	0
562	1	4	0	1	1	1	2	1	1	1	2	3	2	1	0	0	0	20	0	1	0	2	1	3	2	5	0
563	1	4	0	3	2	1	3	2	0	1	2	3	2	1	0	0	0	20	0	1	0	3	2	3	2	5	0
564	1	4	0	2	0	0	2	1	0	1	2	2	1	1	0	0	0	20	0	1	0	2	1	2	1	3	0
565	0	3	0	4	3	0	3	3	0	0	2	3	3	1	1	0	0	20	0	1	1	3	3	3	3	6	1
566	0	4	0	2	3	1	2	1	1	1	1	2	2	1	0	1	0	20	0	1	1	2	1	2	2	4	1
567	0	3	0	3	0	1	3	3	0	0	2	3	3	1	0	0	0	20	0	1	0	3	3	3	3	6	0
568	1	2	0	3	0	0	3	2	0	0	2	2	2	1	0	0	0	20	0	1	0	3	2	2	2	4	0
569	0	1	0	2	1	0	2	1	0	0	2	2	3	1	1	0	0	20	0	1	1	2	1	2	3	5	1
570	0	4	0	2	3	1		1	1	1	1	3	3	1	0	0	1	20	0	1	1		1	3	3	6	1
571	0	4	0	1	0	1	2	1	0	1	1	2	2	1	0	0	0	20	0	1	0	2	1	2	2	4	0
572	0	3	0	3	3	1	3	3	1	1	2	3	3	1	1	0	0	20	0	1	1	3	3	3	3	6	1
573	1	2	0	3	0	0	3	3	0	0	2	3	3	1	0	0	0	20	0	1	0	3	3	3	3	6	0
574	1	1	0	4	2	0	3	2	0	0	2	3	2	1	0	0	0	20	0	1	0	3	2	3	2	5	0
575	1	2	0	4	0	0	3	3	0	0	2	3	3	1	0	0	0	20	0	1	0	3	3	3	3	6	0
576	0	4	0	1	0	1	2	1	0	1	1	3	2	1	0	0	0	20	1	1	0	2	1	3	2	5	1
577	1	2	0	3	3	0	3	2	0	0	2	3	3	1	0	0	0	20	0	1	0	3	2	3	3	6	0
578	0	3	0	1	3	0	1	2	1	1	2	1	2	1	1	0	0	20	0	1	1	1	2	1	2	3	1
579	0	1	0	4	0	0	3	2	0	0	2	2	2	1	0	0	0	20	0	1	0	3	2	2	2	4	0
580	1	1	0	2	1	1	2	2	0	1	0	2	2	1	1	0	0	20	0	1	1	2	2	2	2	4	1
581	0	4	0	1	3	0		2	0	1	2	3	3	1	0	0	1	20	0	1	1		2	3	3	6	1
582	1	5	0	3	0	1	3	2	1	1	2	3	3	1	0	0	0	20	0	1	0	3	2	3	3	6	0
583	0	2	0	1	3	0	1	2	1	1	1	2	2	1	0	1	0	20	0	1	1	1	2	2	2	4	1
584	0	4	0	1	0	1		1	0	1	1	3	3	1	0	0	0	20	0	1	0		1	3	3	6	0
585	1	1	0	3	0	0	3	3	0	0	2	3	3	1	0	0	0	20	0	1	0	3	3	3	3	6	0
586	0	4	0	2	3	1	2	1	1	1	1	2	2	1	0	1	0	20	0	1	1	2	1	2	2	4	1
587	0	2	0	4	0	0	2	1	1	1	1	2	2	1	0	0	1	20	0	1	1	2	1	2	2	4	1
588	1	1	0	4	0	0	3	3	0	0	2	3	3	1	0	0	0	20	0	1	0	3	3	3	3	6	0
589	1	1	0	3	2	0	3	2	0	0	2	3	3	1	0	0	0	20	0	1	0	3	2	3	3	6	0
590	0	4	0	2	0	0	2	2	1	1	1	2	2	1	0	0	1	20	0	1	1	2	2	2	2	4	1
591	1	3	0	3	1	0	4	1	0	0	2	4	3	1	0	0	0	20	0	1	0	3	1	3	3	6	0
592	0	5	0	2	0	1	3	2	1	1	1	3	2	1	1	0	0	20	0	1	1	3	2	3	2	5	1
593	0	4	0	2	3	1	2	1	1	1	1	2	2	1	0	1	0	20	0	1	1	2	1	2	2	4	1
594	0	4	0	3	3	1		1	1	1	2	3	3	1	1	0	0	20	0	1	1		1	3	3	6	1
595	1	2	0	3	4	0	3	3	0	0	2	3	3	1	0	0	0	20	0	1	0	3	3	3	3	6	0
596	0	5	0	1	0	1	2	1	0	0	2	2	2	1	0	0	0	20	0	1	0	2	1	2	2	4	0
597	1	1	0	2	1	1	2	2	0	1	0	2	2	1	1	0	0	20	0	1	1	2	2	2	2	4	1
598	0	3	0	3	0	1	3	3	0	1	2	3	3	1	1	0	0	20	0	1	1	3	3	3	3	6	1
599	0	4	0	2	0	0	2	1	1	0	1	2	2	1	0	0	1	20	0	1	1	2	1	2	2	4	1
600	1	3	0	4	0	0	3	3	0	0	2	3	3	1	0	0	0	20	0	1	0	3	3	3	3	6	0
601	1	3	0	2	3	0		2	0	1	2	3	3	1	0	0	0	20	0	1	0		2	3	3	6	0
602	1	3	0	4	0	0	3	3	0	0	2	3	3	1	0	0	0	20	0	1	0	3	3	3	3	6	0
603	1	4	0	2	4	1		2	1	1	1	3	3	1	0	1	0	20	0	1	1		2	3	3	6	1
604	1	1	0	4	1	0	3	2	0	0	2	2	2	1	0	0	0	20	0	1	0	3	2	2	2	4	0
605	1	3	0	1	2	0	1	1	1	0	2	1	1	1	0	0	0	20	0	1	0	1	1	1	1	2	0
606	0	1	0	1	3	0	2	2	1	0	2	2	2	1	0	0	0	20	0	1	0	2	2	2	2	4	0
607	1	5	0	2	1	0	2	1	1	0	2	2	1	1	0	0	0	20	0	1	0	2	1	2	1	3	0
608	0	1	0	3	0	1	2	2	0	1	2	2	3	1	0	0	0	20	1	1	0	2	2	2	3	5	1
609	0	2	0	1	3	0	1	2	1	1	2	2	2	1	1	0	0	20	0	1	1	1	2	2	2	4	1
610	1	5	0	2	3	0	1	2	1	1	1	2	2	1	1	0	0	20	0	1	1	1	2	2	2	4	1
611	0	1	0	3	0	0	3	3	0	1	2	3	3	1	0	0	0	20	0	1	0	3	3	3	3	6	0
612	1	1	0	4	2	0	3	2	0	0	2	3	3	1	0	0	0	20	0	1	0	3	2	3	3	6	0
613	1	1	0	3	2	0	3	2	0	0	2	3	3	1	0	0	0	20	0	1	0	3	2	3	3	6	0
614	0	5	0	2	3	0	4	1	1	0	1	4	3	1	1	0	0	20	0	1	1	3	1	3	3	6	1
615	1	1	0	3	2	0	3	2	0	1	2	3	3	1	0	0	0	20	0	1	0	3	2	3	3	6	0
616	1	2	0	3	2	0	3	3	1	0	2	3	3	1	0	0	0	20	0	1	0	3	3	3	3	6	0
617	1	4	0	3	2	0	3	2	1	1	2	3	3	1	0	0	0	19	0	1	0	3	2	3	3	6	0
618	1	3	0	2	2	0	2	1	1	0	2	2	1	1	1	0	0	20	0	1	1	2	1	2	1	3	1
619	0	1	0	3	1	0	3	2	0	1	2	3	3	1	0	0	0	20	0	1	0	3	2	3	3	6	0
620	0	5	0	3	0	1	3	2	0	1	1	3	3	1	0	0	0	20	0	1	0	3	2	3	3	6	0
621	0	5	0	3	3	0	2	1	1	0	1	1	2	1	1	0	0	20	0	1	1	2	1	1	2	3	1
622	1	4	0	1	2	0	1	1	0	0	2	2	2	1	0	0	0	20	0	1	0	1	1	2	2	4	0
623	1	2	0	4	0	0	3	3	0	0	2	3	3	1	0	0	0	20	0	1	0	3	3	3	3	6	0
624	1	1	0	2	2	1	2	2	0	0	2	2	2	1	1	0	0	20	0	1	1	2	2	2	2	4	1
625	1	3	0	2	3	0		2	0	1	2	3	3	1	0	0	0	20	0	1	0		2	3	3	6	0
626	1	3	0	2	1	1	2	2	0	1	1	2	2	1	0	0	1	20	0	1	1	2	2	2	2	4	1
627	1	3	0	1	4	0	1	2	1	1	1	1	2	1	0	1	0	20	0	1	1	1	2	1	2	3	1
628	0	1	0	4	0	0	3	2	0	0	2	2	2	1	0	0	0	20	0	1	0	3	2	2	2	4	0
629	1	1	0	3	0	0	3	2	1	0	2	3	3	1	0	0	0	20	0	1	0	3	2	3	3	6	0
630	0	4	0	1	3	0		1	1	0	1	3	3	1	1	0	0	20	0	1	1		1	3	3	6	1
631	0	3	0	3	0	1	3	3	1	0	2	3	3	1	0	0	0	20	0	1	0	3	3	3	3	6	0
632	1	1	0	3	2	0	3	2	0	0	2	3	3	1	0	0	0	20	0	1	0	3	2	3	3	6	0
633	0	2	0	2	1	1	3	3	0	1	1	3	2	1	0	0	1	20	0	1	1	3	3	3	2	5	1
634	1	2	0	3	0	0	3	2	0	0	2	2	2	1	0	0	0	20	0	1	0	3	2	2	2	4	0
635	0	5	0	2	1	0	2	1	1	0	2	2	2	1	0	0	0	20	0	1	0	2	1	2	2	4	0
636	1	2	0	4	2	0	3	3	0	0	2	3	3	1	0	0	0	20	0	1	0	3	3	3	3	6	0
637	1	5	0	2	3	0	3	2	0	0	2	2	2	1	0	0	0	20	0	1	0	3	2	2	2	4	0
638	0	4	0	1	0	1	2	1	0	1	1	2	2	1	0	0	0	20	0	1	0	2	1	2	2	4	0
639	0	1	0	1	0	0	2	2	0	1	2	2	2	1	0	0	0	20	0	1	0	2	2	2	2	4	0
640	0	3	0	3	0	1	3	2	1	1	1	3	2	1	0	0	0	20	1	1	0	3	2	3	2	5	1
641	1	3	0	1	4	0	1	2	1	1	1	1	2	1	0	1	0	20	0	1	1	1	2	1	2	3	1
642	1	1	0	4	2	0	3	2	0	0	2	3	2	1	0	0	0	20	0	1	0	3	2	3	2	5	0
643	1	3	0	2	2	0	3	3	1	0	2	3	4	1	1	0	0	20	0	1	1	3	3	3	3	6	1
644	1	2	0	3	2	0	3	2	0	0	2	2	2	1	0	0	0	20	0	1	0	3	2	2	2	4	0
645	1	3	0	3	2	0	3	3	0	0	2	3	3	1	0	0	0	20	0	1	0	3	3	3	3	6	0
646	1	3	0	3	0	0		2	0	1	2	3	3	1	0	0	0	20	0	1	0		2	3	3	6	0
647	0	1	0	2	0	1	2	2	1	1	1	2	2	1	0	0	1	20	0	1	1	2	2	2	2	4	1
648	1	2	0	4	0	0	3	3	0	0	2	3	3	1	0	0	0	20	0	1	0	3	3	3	3	6	0
649	1	4	0	2	2	0	2	1	1	1	1	2	1	1	0	0	1	20	0	1	1	2	1	2	1	3	1
650	0	2	0	1	3	0	2	2	1	0	2	2	2	1	0	0	0	20	0	1	0	2	2	2	2	4	0
651	0	2	0	3	3	1	3	2	1	1	2	3	3	1	1	0	0	20	0	1	1	3	2	3	3	6	1
652	1	2	0	3	0	0	3	2	0	0	2	2	2	1	0	0	0	20	0	1	0	3	2	2	2	4	0
653	1	5	0	3	1	0	3	2	1	1	2	3	3	1	0	0	0	20	0	1	0	3	2	3	3	6	0
654	1	1	0	3	0	0	3	2	0	0	2	2	2	1	0	0	0	20	0	1	0	3	2	2	2	4	0
655	1	1	0	4	0	0	3	2	0	0	2	2	2	1	0	0	0	20	0	1	0	3	2	2	2	4	0
656	1	4	0	2	2	0	1	2	0	0	2	2	2	1	0	0	0	20	0	1	0	1	2	2	2	4	0
657	0	3	0	1	3	0	1	2	1	0	2	1	2	1	1	0	0	20	0	1	1	1	2	1	2	3	1
658	0	4	0	3	3	0		1	0	1	2	3	3	1	0	0	0	20	0	1	0		1	3	3	6	0
659	1	5	0	3	1	0	3	3	1	1	2	3	2	1	0	0	0	20	0	1	0	3	3	3	2	5	0
660	0	3	0	1	3	0	1	2	1	1	2	1	2	1	1	0	0	20	0	1	1	1	2	1	2	3	1
661	1	4	0	3	1	0	3	1	0	0	2	3	2	1	0	0	0	20	0	1	0	3	1	3	2	5	0
662	1	5	0	3	1	0	3	3	1	1	2	3	3	1	0	0	0	20	0	1	0	3	3	3	3	6	0
663	0	3	0	3	4	0	3	3	1	1	1	3	3	1	0	1	0	20	0	1	1	3	3	3	3	6	1
664	1	4	0	1	1	1		2	1	1	1	3	3	1	0	0	1	20	0	1	1		2	3	3	6	1
665	1	1	0	3	1	0	3	2	0	1	2	3	3	1	0	0	0	20	0	1	0	3	2	3	3	6	0
666	1	3	0	3	0	0		2	0	1	2	3	3	1	0	0	0	20	0	1	0		2	3	3	6	0
667	0	1	0	2	0	0	2	2	0	1	2	3	3	1	1	0	0	20	0	1	1	2	2	3	3	6	1
668	0	2	0	3	0	1	3	3	1	1	1	3	3	1	0	0	1	20	0	1	1	3	3	3	3	6	1
669	0	4	0	2	3	1		1	1	1	1	3	3	1	0	0	1	20	0	1	1		1	3	3	6	1
670	0	2	0	3	3	0	3	2	1	0	2	3	3	1	1	0	0	20	0	1	1	3	2	3	3	6	1
671	1	1	0	2	2	1	2	2	0	0	2	2	2	1	1	0	0	20	0	1	1	2	2	2	2	4	1
672	1	1	0	3	0	0	3	2	0	0	2	2	2	1	0	0	0	20	0	1	0	3	2	2	2	4	0
673	0	3	0	2	1	1	2	1	0	1	1	2	1	1	0	0	1	20	0	1	1	2	1	2	1	3	1
674	1	2	0	3	0	0	3	2	0	0	2	2	2	1	0	0	0	20	0	1	0	3	2	2	2	4	0
675	0	3	0	1	4	1	1	2	0	1	1	1	2	1	0	0	1	20	0	1	1	1	2	1	2	3	1
676	1	3	0	4	0	0	3	3	0	0	2	3	3	1	0	0	0	20	0	1	0	3	3	3	3	6	0
677	1	3	0	2	0	0	1	2	0	0	2	1	2	1	0	0	0	20	0	1	0	1	2	1	2	3	0
678	0	5	0	1	0	1	2	1	0	0	2	2	2	1	0	0	0	20	0	1	0	2	1	2	2	4	0
679	0	4	0	3	0	0	3	2	0	0	2	3	2	1	0	0	0	20	0	1	0	3	2	3	2	5	0
680	1	2	0	3	2	0	3	2	0	0	2	2	2	1	0	0	0	20	0	1	0	3	2	2	2	4	0
681	0	5	0	2	1	0	3	2	1	0	2	3	3	1	0	0	0	20	0	1	0	3	2	3	3	6	0
682	1	3	0	4	0	0	3	3	0	0	2	3	3	1	0	0	0	20	0	1	0	3	3	3	3	6	0
683	0	3	0	3	3	1	3	3	1	1	2	3	3	1	1	0	0	20	0	1	1	3	3	3	3	6	1
684	0	1	0	4	4	0	4	4	0	0	2	3	3	1	1	0	0	20	0	1	1	3	3	3	3	6	1
685	1	3	0	3	0	0	3	3	0	1	2	3	2	1	0	0	0	20	0	1	0	3	3	3	2	5	0
686	0	4	0	3	1	0	3	1	0	0	2	3	2	1	1	0	0	20	0	1	1	3	1	3	2	5	1
687	1	4	0	1	1	1		2	1	1	1	3	3	1	0	0	1	20	0	1	1		2	3	3	6	1
688	0	4	0	2	3	1		1	1	1	1	3	3	1	0	0	1	20	0	1	1		1	3	3	6	1
689	1	1	0	3	2	0	3	2	0	0	2	3	3	1	0	0	0	20	0	1	0	3	2	3	3	6	0
690	1	1	0	3	0	0	3	2	0	0	2	3	3	1	0	0	0	20	0	1	0	3	2	3	3	6	0
691	1	1	0	4	2	0	3	2	0	0	2	3	2	1	0	0	0	20	0	1	0	3	2	3	2	5	0
692	0	3	0	1	0	0	3	2	1	0	2	3	2	1	1	0	0	20	0	1	1	3	2	3	2	5	1
693	1	4	0	2	4	0		2	1	0	1	3	3	1	0	1	0	20	0	1	1		2	3	3	6	1
694	0	3	0	1	3	0	1	2	1	1	1	1	2	1	1	0	0	20	0	1	1	1	2	1	2	3	1
695	1	1	0	3	0	0	3	3	0	0	2	3	3	1	0	0	0	20	0	1	0	3	3	3	3	6	0
696	0	1	0	3	0	0	3	2	0	1	2	3	3	1	0	0	0	20	0	1	0	3	2	3	3	6	0
697	0	4	0	3	3	0		1	0	1	2	3	3	1	0	0	0	20	0	1	0		1	3	3	6	0
698	0	1	0	4	0	0	3	2	0	0	2	2	2	1	0	0	0	20	0	1	0	3	2	2	2	4	0
699	0	1	0	2	0	1	2	2	1	1	1	3	3	1	0	0	1	20	0	1	1	2	2	3	3	6	1
700	1	1	0	4	0	0	3	2	0	0	2	2	2	1	0	0	0	20	0	1	0	3	2	2	2	4	0
701	0	2	0	3	3	1	2	2	1	1	2	3	3	1	1	0	0	20	0	1	1	2	2	3	3	6	1
702	0	2	0	2	3	0	3	2	1	1	1	2	2	1	0	1	0	20	0	1	1	3	2	2	2	4	1
703	1	5	0	2	4	0	3	3	0	0	2	3	2	1	0	0	0	20	0	1	0	3	3	3	2	5	0
704	1	2	0	3	0	0	3	2	0	0	2	2	2	1	0	0	0	20	0	1	0	3	2	2	2	4	0
705	0	1	0	3	0	0	4	2	1	1	2	4	2	1	1	0	0	20	0	1	1	3	2	3	2	5	1
706	1	3	0	2	2	0		2	0	0	2	3	3	1	0	0	0	20	0	1	0		2	3	3	6	0
707	0	1	0	3	0	0	3	2	0	1	2	3	3	1	0	0	0	20	0	1	0	3	2	3	3	6	0
708	0	3	0	3	4	0	3	2	1	0	2	3	3	1	0	1	0	20	0	1	1	3	2	3	3	6	1
709	1	2	0	3	0	0	3	3	0	0	2	3	3	1	0	0	0	20	0	1	0	3	3	3	3	6	0
710	1	3	0	2	2	0		2	0	0	2	3	3	1	0	0	0	20	0	1	0		2	3	3	6	0
711	0	2	0	2	1	1	3	2	1	1	1	2	2	1	0	0	1	20	0	1	1	3	2	2	2	4	1
712	1	2	0	1	0	1	2	2	0	1	2	2	2	1	1	0	0	20	0	1	1	2	2	2	2	4	1
713	0	4	0	2	3	0		1	1	0	1	3	3	1	1	0	0	20	0	1	1		1	3	3	6	1
714	0	4	0	2	0	1		1	1	1	1	3	3	1	0	0	1	20	0	1	1		1	3	3	6	1
715	1	1	0	3	0	0	3	2	0	0	2	3	3	1	0	0	0	20	0	1	0	3	2	3	3	6	0
716	1	1	0	3	2	0	3	2	1	1	2	3	3	1	0	0	0	20	0	1	0	3	2	3	3	6	0
717	1	1	0	4	2	0	3	2	0	0	2	3	3	1	0	0	0	20	0	1	0	3	2	3	3	6	0
718	1	5	0	2	1	0	3	2	1	0	2	2	2	1	0	0	0	20	0	1	0	3	2	2	2	4	0
719	0	3	0	3	0	1	3	2	1	1	1	3	2	1	0	0	0	20	1	1	0	3	2	3	2	5	1
720	1	3	0	4	0	0	3	3	0	0	2	3	3	1	0	0	0	20	0	1	0	3	3	3	3	6	0
721	0	3	0	3	1	0	3	3	0	0	2	3	3	1	0	0	0	20	0	1	0	3	3	3	3	6	0
722	1	3	0	4	0	0	3	3	0	0	2	3	3	1	0	0	0	20	0	1	0	3	3	3	3	6	0
723	0	3	0	3	3	0	3	3	1	1	2	3	3	1	1	0	0	20	0	1	1	3	3	3	3	6	1
724	0	1	0	1	1	1	2	2	0	1	0	2	2	1	1	0	0	20	0	1	1	2	2	2	2	4	1
725	1	4	0	1	0	1	2	1	0	0	2	3	2	1	0	0	0	20	0	1	0	2	1	3	2	5	0
726	1	2	0	4	0	0	3	3	0	0	2	3	3	1	0	0	0	20	0	1	0	3	3	3	3	6	0
727	1	1	0	3	0	1	3	2	0	1	2	3	3	1	0	0	0	20	0	1	0	3	2	3	3	6	0
728	1	1	0	4	0	0	3	2	0	0	2	2	2	1	0	0	0	20	0	1	0	3	2	2	2	4	0
729	0	3	0	3	2	0	3	3	0	0	2	3	3	1	0	0	0	20	0	1	0	3	3	3	3	6	0
730	1	1	0	4	0	0	3	2	0	0	2	2	2	1	0	0	0	20	0	1	0	3	2	2	2	4	0
731	1	3	0	2	0	0	2	1	0	0	2	2	2	1	0	0	0	20	0	1	0	2	1	2	2	4	0
732	0	4	0	1	0	1		2	1	1	1	3	3	1	0	0	1	20	0	1	1		2	3	3	6	1
733	1	1	0	2	2	1	2	2	0	0	2	3	3	1	1	0	0	20	0	1	1	2	2	3	3	6	1
734	0	3	0	3	0	1	3	3	0	0	2	3	3	1	0	0	0	20	0	1	0	3	3	3	3	6	0
735	1	4	0	1	1	1		2	1	1	1	3	3	1	0	0	1	20	0	1	1		2	3	3	6	1
736	1	3	0	2	2	0		2	1	1	2	3	3	1	0	0	1	20	0	1	1		2	3	3	6	1
737	1	5	0	2	4	0	3	2	0	0	2	2	2	1	0	0	0	20	0	1	0	3	2	2	2	4	0
738	1	1	0	4	2	0	3	2	0	0	2	3	3	1	0	0	0	20	0	1	0	3	2	3	3	6	0
739	0	2	0	3	3	1	2	2	1	1	2	3	3	1	1	0	0	20	0	1	1	2	2	3	3	6	1
740	1	5	0	3	1	0	3	3	1	1	2	3	3	1	0	0	0	20	0	1	0	3	3	3	3	6	0
741	1	1	0	4	1	0	3	2	0	0	2	2	2	1	0	0	0	20	0	1	0	3	2	2	2	4	0
742	0	2	0	2	3	1	3	2	1	1	1	3	3	1	0	0	1	20	0	1	1	3	2	3	3	6	1
743	1	1	0	4	2	0	3	2	0	0	2	3	2	1	0	0	0	20	0	1	0	3	2	3	2	5	0
744	1	1	0	3	0	0	3	3	0	1	2	3	3	1	0	0	0	20	0	1	0	3	3	3	3	6	0
745	1	3	0	2	2	0	3	1	1	1	2	3	2	1	0	0	1	20	0	1	1	3	1	3	2	5	1
746	0	1	0	3	0	0	3	3	0	1	2	3	3	1	0	0	0	20	0	1	0	3	3	3	3	6	0
747	0	3	0	2	4	1		2	1	1	0	3	3	1	0	1	0	20	0	1	1		2	3	3	6	1
748	1	4	0	3	2	1	3	2	0	1	2	3	2	1	0	0	0	20	0	1	0	3	2	3	2	5	0
749	1	2	0	3	0	0	3	2	0	0	2	2	2	1	0	0	0	20	0	1	0	3	2	2	2	4	0
750	1	5	0	3	0	1	3	2	1	1	2	3	3	1	0	0	0	20	0	1	0	3	2	3	3	6	0
751	0	1	0	2	4	0	2	2	0	0	2	2	2	1	0	0	1	20	0	1	1	2	2	2	2	4	1
752	1	1	0	4	2	0	3	1	0	0	2	3	2	1	0	0	0	20	0	1	0	3	1	3	2	5	0
753	0	2	0	2	1	1	3	3	0	1	1	3	2	1	0	0	1	20	0	1	1	3	3	3	2	5	1
754	0	1	0	1	0	0	2	2	0	1	2	2	2	1	0	0	0	20	0	1	0	2	2	2	2	4	0
755	0	4	0	2	3	0	3	1	1	1	1	3	2	1	0	0	1	20	0	1	1	3	1	3	2	5	1
756	0	2	0	3	1	1	3	1	1	1	1	3	2	1	0	0	1	20	0	1	1	3	1	3	2	5	1
757	1	5	0	2	1	0	2	1	1	0	2	2	2	1	0	0	0	20	0	1	0	2	1	2	2	4	0
758	0	2	0	4	0	0	3	3	0	0	2	3	3	1	0	0	0	20	0	1	0	3	3	3	3	6	0
759	0	2	0	3	0	1	3	3	1	1	1	3	3	1	0	0	1	20	0	1	1	3	3	3	3	6	1
760	1	1	0	3	0	0	3	2	0	1	2	3	3	1	0	0	0	20	0	1	0	3	2	3	3	6	0
761	1	2	0	3	0	0	3	2	0	0	2	3	3	1	0	0	0	20	0	1	0	3	2	3	3	6	0
762	0	3	0	1	1	1	1	2	1	1	1	1	2	1	0	0	1	20	0	1	1	1	2	1	2	3	1
763	1	3	0	2	2	0		2	1	1	2	3	3	1	0	0	1	20	0	1	1		2	3	3	6	1
764	0	4	0	3	3	1		1	1	1	2	3	3	1	1	0	0	20	0	1	1		1	3	3	6	1
765	1	4	0	3	2	1	3	2	0	1	2	3	2	1	0	0	0	20	0	1	0	3	2	3	2	5	0
766	1	5	0	2	4	0	3	2	0	0	2	3	3	1	0	0	0	20	0	1	0	3	2	3	3	6	0
767	1	3	0	2	1	1	2	2	0	1	1	2	1	1	0	0	1	20	0	1	1	2	2	2	1	3	1
768	1	1	0	3	0	0	3	2	0	1	2	3	3	1	0	0	0	20	0	1	0	3	2	3	3	6	0
769	1	3	0	4	0	0	3	3	0	0	2	3	3	1	0	0	0	20	0	1	0	3	3	3	3	6	0
770	0	3	0	2	3	1	3	3	1	1	1	3	3	1	0	0	1	20	0	1	1	3	3	3	3	6	1
771	0	2	0	3	0	1	3	2	1	1	1	2	2	1	0	0	1	20	0	1	1	3	2	2	2	4	1
772	0	2	0	3	1	1	3	2	0	1	2	2	2	1	0	0	0	20	0	1	0	3	2	2	2	4	0
773	1	5	0	2	3	0	1	2	1	1	1	2	2	1	1	0	0	20	0	1	1	1	2	2	2	4	1
774	0	4	0	2	0	0	3	2	0	0	2	3	2	1	0	0	0	20	0	1	0	3	2	3	2	5	0
775	0	5	0	2	0	1	2	1	1	0	1	1	2	1	0	0	0	20	0	1	0	2	1	1	2	3	0
776	1	5	0	2	4	0	3	2	0	0	2	2	2	1	0	0	0	20	0	1	0	3	2	2	2	4	0
777	1	4	0	2	0	0	2	1	0	1	2	2	2	1	0	0	0	20	0	1	0	2	1	2	2	4	0
778	1	2	0	3	0	0	3	2	0	1	2	2	2	1	0	0	0	20	0	1	0	3	2	2	2	4	0
779	1	4	0	1	2	0	1	1	0	0	2	2	2	1	0	0	0	20	0	1	0	1	1	2	2	4	0
780	0	5	0	3	4	0	3	3	0	1	2	3	3	1	0	0	0	20	0	1	0	3	3	3	3	6	0
781	1	1	0	4	0	0	3	3	0	0	2	3	3	1	0	0	0	20	0	1	0	3	3	3	3	6	0
782	1	3	0	2	3	0	2	2	0	0	2	2	2	1	0	0	0	20	0	1	0	2	2	2	2	4	0
783	1	3	0	3	2	0	3	3	0	0	2	3	3	1	0	0	0	20	0	1	0	3	3	3	3	6	0
784	1	1	0	1	1	1	2	2	0	1	1	2	2	1	0	0	1	20	0	1	1	2	2	2	2	4	1
785	0	3	0	1	3	0	1	2	1	1	2	1	2	1	1	0	0	20	0	1	1	1	2	1	2	3	1
786	0	5	0	1	3	1	2	2	0	1	1	2	2	1	0	0	1	20	0	1	1	2	2	2	2	4	1
787	1	1	0	3	0	0	3	3	1	1	2	4	3	1	1	0	0	20	0	1	1	3	3	3	3	6	1
788	1	3	0	4	0	0	3	3	0	0	2	3	3	1	0	0	0	20	0	1	0	3	3	3	3	6	0
789	1	4	0	2	0	0	2	1	0	1	2	2	2	1	0	0	0	20	0	1	0	2	1	2	2	4	0
790	1	3	0	1	0	0	2	1	0	0	2	2	2	1	0	0	0	20	0	1	0	2	1	2	2	4	0
791	0	3	0	1	0	1	1	2	1	1	1	1	2	1	0	0	1	20	0	1	1	1	2	1	2	3	1
792	1	3	0	1	1	1	1	2	1	1	1	1	2	1	0	0	1	20	0	1	1	1	2	1	2	3	1
793	1	2	0	3	0	0	3	2	0	1	2	2	2	1	0	0	0	20	0	1	0	3	2	2	2	4	0
794	0	4	0	3	1	0	3	1	0	0	2	3	2	1	0	0	0	20	0	1	0	3	1	3	2	5	0
795	0	3	0	3	0	1	3	3	0	0	2	3	3	1	0	0	0	20	0	1	0	3	3	3	3	6	0
796	0	3	0	3	1	0	3	3	0	0	2	3	3	1	0	0	0	20	0	1	0	3	3	3	3	6	0
797	1	2	0	3	2	0	3	3	1	1	2	3	4	1	1	0	0	20	0	1	1	3	3	3	3	6	1
798	1	4	0	3	2	0	3	2	0	1	2	3	3	1	0	0	0	20	0	1	0	3	2	3	3	6	0
799	1	3	0	3	0	0	3	2	0	0	2	3	2	1	0	0	0	20	0	1	0	3	2	3	2	5	0
800	1	1	0	3	2	0	3	1	1	0	2	3	3	1	0	0	0	20	0	1	0	3	1	3	3	6	0
801	0	1	0	4	1	0	3	3	0	0	2	3	3	1	0	0	0	20	0	1	0	3	3	3	3	6	0
802	1	4	0	3	1	0	3	1	0	0	2	3	2	1	0	0	0	20	0	1	0	3	1	3	2	5	0
803	1	1	0	2	2	1	2	2	0	0	2	2	2	1	1	0	0	20	0	1	1	2	2	2	2	4	1
804	0	2	0	2	4	0	3	2	0	1	2	3	2	1	0	0	1	20	0	1	1	3	2	3	2	5	1
805	0	5	0	2	0	1	3	2	0	1	1	2	2	1	0	0	0	20	0	1	0	3	2	2	2	4	0
806	1	3	0	2	1	1	3	3	0	1	2	3	3	1	1	0	0	20	0	1	1	3	3	3	3	6	1
807	1	4	0	3	1	0	3	1	0	0	2	3	2	1	0	0	0	20	0	1	0	3	1	3	2	5	0
808	0	3	0	1	3	0	1	2	1	0	2	1	2	1	0	0	0	20	0	1	0	1	2	1	2	3	0
809	1	5	0	2	1	0	2	1	1	0	2	2	1	1	0	0	0	20	0	1	0	2	1	2	1	3	0
810	1	1	0	3	2	0	3	1	1	0	2	3	3	1	0	0	0	20	0	1	0	3	1	3	3	6	0
811	1	1	0	2	2	0	2	2	0	0	2	2	2	1	0	0	0	20	0	1	0	2	2	2	2	4	0
812	1	1	0	2	2	1	2	2	0	0	2	2	2	1	1	0	0	20	0	1	1	2	2	2	2	4	1
813	0	2	0	4	0	0	3	3	0	0	2	3	3	1	0	0	0	20	0	1	0	3	3	3	3	6	0
814	1	4	0	2	3	0	1	2	0	0	2	2	2	1	0	0	0	20	0	1	0	1	2	2	2	4	0
815	1	4	0	3	1	0	3	1	0	0	2	3	2	1	0	0	0	20	0	1	0	3	1	3	2	5	0
816	0	3	0	2	0	0	3	1	1	0	2	3	2	1	0	0	1	20	0	1	1	3	1	3	2	5	1
817	1	4	0	1	1	0	2	1	0	1	2	2	2	1	0	0	0	20	0	1	0	2	1	2	2	4	0
818	0	3	0	3	0	1	3	3	0	1	2	3	3	1	1	0	0	20	0	1	1	3	3	3	3	6	1
819	0	1	0	4	0	0	3	2	0	0	2	2	2	1	0	0	0	20	0	1	0	3	2	2	2	4	0
820	1	4	0	2	2	0	3	2	0	0	2	3	2	1	0	0	0	20	0	1	0	3	2	3	2	5	0
821	0	1	0	2	3	0	3	1	0	1	2	3	3	1	1	0	0	20	0	1	1	3	1	3	3	6	1
822	1	1	0	3	1	0	3	2	0	1	2	3	3	1	0	0	0	20	0	1	0	3	2	3	3	6	0
823	1	1	0	3	2	0	3	2	0	0	2	3	3	1	0	0	0	20	0	1	0	3	2	3	3	6	0
824	1	1	0	3	2	0	3	2	0	0	2	3	3	1	0	0	0	20	0	1	0	3	2	3	3	6	0
825	1	5	0	2	4	0	3	2	0	0	2	3	3	1	0	0	0	20	0	1	0	3	2	3	3	6	0
826	1	3	0	3	2	0	3	3	0	0	2	3	3	1	0	0	0	20	0	1	0	3	3	3	3	6	0
827	1	1	0	4	1	0	3	2	0	0	2	2	2	1	0	0	0	20	0	1	0	3	2	2	2	4	0
828	1	1	0	3	0	0	3	2	1	0	2	3	3	1	0	0	0	20	0	1	0	3	2	3	3	6	0
829	0	2	0	3	3	0	3	2	0	1	2	3	3	1	0	0	0	20	0	1	0	3	2	3	3	6	0
830	1	1	0	2	2	0	2	2	0	0	2	2	2	1	0	0	0	20	0	1	0	2	2	2	2	4	0
831	0	1	0	4	1	0	4	4	0	0	2	3	3	1	1	0	0	20	0	1	1	3	3	3	3	6	1
832	0	2	0	3	3	1	3	2	1	1	2	3	3	1	1	0	0	20	0	1	1	3	2	3	3	6	1
833	0	2	0	2	0	1	3	2	1	1	1	3	2	1	0	0	1	20	0	1	1	3	2	3	2	5	1
834	1	2	0	4	0	1	3	2	0	0	2	3	2	1	0	0	0	20	0	1	0	3	2	3	2	5	0
835	1	4	0	2	1	1		1	1	1	1	3	3	1	0	0	1	20	0	1	1		1	3	3	6	1
836	1	5	0	2	4	0	3	3	0	0	2	3	2	1	0	0	0	20	0	1	0	3	3	3	2	5	0
837	1	4	0	3	1	0	3	1	0	0	2	3	2	1	0	0	0	20	0	1	0	3	1	3	2	5	0
838	0	4	0	2	3	1		1	1	1	1	3	3	1	0	0	1	20	0	1	1		1	3	3	6	1
839	1	3	0	2	2	0		2	1	1	2	3	3	1	0	0	1	20	0	1	1		2	3	3	6	1
840	0	4	0	1	3	0		1	1	1	2	3	3	1	1	0	0	20	0	1	1		1	3	3	6	1
841	0	3	0	3	4	1	1	1	0	1	1	2	1	1	0	0	1	20	0	1	1	1	1	2	1	3	1
842	1	1	0	4	1	0	3	3	0	0	2	3	3	1	0	0	0	20	0	1	0	3	3	3	3	6	0
843	1	1	0	3	0	0	3	2	0	0	2	2	2	1	0	0	0	20	0	1	0	3	2	2	2	4	0
844	1	1	0	3	2	0	3	2	1	1	2	3	3	1	0	0	0	20	0	1	0	3	2	3	3	6	0
845	0	1	0	3	1	1	3	3	0	1	0	3	3	1	1	0	0	20	0	1	1	3	3	3	3	6	1
846	1	4	0	3	1	0		2	0	1	2	3	3	1	0	0	0	20	0	1	0		2	3	3	6	0
847	0	4	0	1	0	0		2	0	1	2	3	3	1	0	0	1	20	0	1	1		2	3	3	6	1
848	0	2	0	4	4	0	3	1	1	1	2	4	1	1	1	0	0	20	0	1	1	3	1	3	1	4	1
849	1	2	0	2	2	0	3	2	0	0	2	2	2	1	1	0	0	20	0	1	1	3	2	2	2	4	1
850	1	1	0	1	0	0	3	3	0	1	2	3	3	1	1	0	0	20	0	1	1	3	3	3	3	6	1
851	0	3	0	1	3	0	1	2	1	0	1	1	2	1	1	0	0	20	0	1	1	1	2	1	2	3	1
852	1	1	0	4	1	0	3	2	0	0	2	2	2	1	0	0	0	20	0	1	0	3	2	2	2	4	0
853	1	3	0	1	3	1	1	1	0	1	2	1	1	1	0	0	0	20	0	1	0	1	1	1	1	2	0
854	1	3	0	1	0	0	2	1	0	0	2	2	2	1	0	0	0	20	0	1	0	2	1	2	2	4	0
855	0	1	0	2	1	0	2	2	0	0	2	2	2	1	0	0	0	20	0	1	0	2	2	2	2	4	0
856	1	1	0	2	2	0	2	2	0	0	2	2	2	1	0	0	0	20	0	1	0	2	2	2	2	4	0
857	0	5	0	2	0	1	3	2	1	1	1	3	2	1	1	0	0	20	0	1	1	3	2	3	2	5	1
858	1	3	0	3	2	0	3	3	0	0	2	3	3	1	0	0	0	20	0	1	0	3	3	3	3	6	0
859	0	2	0	2	3	0	3	2	1	0	1	2	2	1	0	1	0	20	0	1	1	3	2	2	2	4	1
860	0	3	0	2	3	1	3	3	1	1	1	3	3	1	0	0	1	20	0	1	1	3	3	3	3	6	1
861	1	4	0	3	0	1		1	1	1	1	3	3	1	0	0	0	20	1	1	0		1	3	3	6	1
862	0	1	0	3	1	1	3	3	0	1	0	3	3	1	1	0	0	20	0	1	1	3	3	3	3	6	1
863	0	5	0	1	0	1	2	1	0	0	2	2	2	1	0	0	0	20	0	1	0	2	1	2	2	4	0
864	1	4	0	2	2	0	2	1	0	1	2	2	1	1	0	0	1	20	0	1	1	2	1	2	1	3	1
865	1	5	0	2	1	0	3	2	1	1	2	2	2	1	0	0	0	20	0	1	0	3	2	2	2	4	0
866	0	5	0	1	3	1	2	2	0	1	1	2	2	1	0	0	1	20	0	1	1	2	2	2	2	4	1
867	1	4	0	3	2	0	3	2	0	1	2	3	3	1	0	0	0	20	0	1	0	3	2	3	3	6	0
868	1	2	0	3	2	0	3	2	0	0	2	2	2	1	0	0	0	20	0	1	0	3	2	2	2	4	0
869	0	4	0	3	3	1		1	1	1	2	3	3	1	1	0	0	20	0	1	1		1	3	3	6	1
870	0	3	0	3	4	1	2	1	1	1	0	2	1	1	0	1	0	20	0	1	1	2	1	2	1	3	1
871	0	3	0	3	0	1	3	3	0	0	2	3	3	1	1	0	0	20	0	1	1	3	3	3	3	6	1
872	0	5	0	1	0	1	2	1	0	1	2	2	2	1	0	0	0	20	0	1	0	2	1	2	2	4	0
873	0	5	0	2	3	0	2	2	1	1	1	2	2	1	1	0	0	20	0	1	1	2	2	2	2	4	1
874	0	4	0	1	0	1	2	1	0	1	1	3	3	1	0	0	0	20	0	1	0	2	1	3	3	6	0
875	1	5	0	3	1	0	3	3	1	1	2	3	3	1	0	0	0	20	0	1	0	3	3	3	3	6	0
876	1	1	0	3	2	0	3	2	1	1	2	3	3	1	0	0	0	20	0	1	0	3	2	3	3	6	0
877	0	1	0	2	0	1	2	2	1	1	1	3	3	1	0	0	1	20	0	1	1	2	2	3	3	6	1
878	0	3	0	1	3	0	1	2	1	1	2	1	2	1	1	0	0	20	0	1	1	1	2	1	2	3	1
879	1	2	0	3	0	0	3	2	0	0	2	2	2	1	0	0	0	20	0	1	0	3	2	2	2	4	0
880	0	1	0	3	3	0	3	3	1	0	2	3	3	1	1	0	0	20	0	1	1	3	3	3	3	6	1
881	1	2	0	3	0	0	3	2	0	0	2	3	3	1	0	0	0	20	0	1	0	3	2	3	3	6	0
882	0	5	0	2	0	1	3	2	1	1	1	3	2	1	1	0	0	20	0	1	1	3	2	3	2	5	1
883	0	4	0	2	0	1		1	1	1	1	3	3	1	0	0	1	20	0	1	1		1	3	3	6	1
884	1	1	0	1	1	1	2	2	0	1	1	2	2	1	0	0	1	20	0	1	1	2	2	2	2	4	1
885	1	1	0	1	3	0	2	2	1	1	1	2	2	1	1	0	0	20	0	1	1	2	2	2	2	4	1
886	1	2	0	4	1	1	1	2	0	1	2	1	2	1	1	0	0	20	0	1	1	1	2	1	2	3	1
887	1	3	0	2	2	0		2	1	1	2	3	3	1	0	0	1	20	0	1	1		2	3	3	6	1
888	0	4	0	2	3	1	2	1	1	1	1	2	2	1	0	1	0	20	0	1	1	2	1	2	2	4	1
889	1	2	0	2	0	1	3	2	0	0	2	2	2	1	1	0	0	20	0	1	1	3	2	2	2	4	1
890	1	1	0	2	2	0	2	2	0	0	2	2	2	1	0	0	0	20	0	1	0	2	2	2	2	4	0
891	0	1	0	2	1	1	2	2	0	1	0	2	2	1	1	0	0	20	0	1	1	2	2	2	2	4	1
892	1	2	0	3	3	0	3	2	0	0	2	3	3	1	0	0	0	20	0	1	0	3	2	3	3	6	0
893	1	3	0	2	3	0	2	2	0	0	2	2	2	1	0	0	0	20	0	1	0	2	2	2	2	4	0
894	0	1	0	4	1	0	3	3	0	0	2	3	3	1	0	0	0	20	0	1	0	3	3	3	3	6	0
895	0	3	0	3	4	0	3	3	0	0	2	3	2	1	0	0	0	20	0	1	0	3	3	3	2	5	0
896	0	4	0	2	0	0	2	2	1	1	1	2	2	1	0	0	1	20	0	1	1	2	2	2	2	4	1
897	1	5	0	3	0	1	3	2	1	1	2	3	3	1	0	0	0	20	0	1	0	3	2	3	3	6	0
898	1	1	0	2	2	0	2	2	0	0	2	2	2	1	0	0	0	20	0	1	0	2	2	2	2	4	0
899	1	2	0	3	0	0	3	3	0	0	2	3	3	1	0	0	0	20	0	1	0	3	3	3	3	6	0
900	0	1	0	1	3	0	2	2	1	0	2	2	2	1	1	0	0	20	0	1	1	2	2	2	2	4	1
901	1	3	0	2	2	0		2	1	1	2	3	3	1	0	0	1	20	0	1	1		2	3	3	6	1
902	0	4	0	1	0	0	2	2	1	1	2	2	2	1	1	0	0	20	0	1	1	2	2	2	2	4	1
903	1	2	0	3	0	0	3	2	0	0	2	3	3	1	0	0	0	20	0	1	0	3	2	3	3	6	0
904	1	5	0	2	1	0	2	1	1	0	2	2	2	1	0	0	0	20	0	1	0	2	1	2	2	4	0
905	0	4	0	1	3	0		1	1	1	2	3	3	1	0	0	0	20	0	1	0		1	3	3	6	0
906	1	1	0	4	2	0	3	1	0	0	2	3	2	1	0	0	0	20	0	1	0	3	1	3	2	5	0
907	1	1	0	4	2	0	3	2	0	0	2	3	3	1	0	0	0	20	0	1	0	3	2	3	3	6	0
908	0	5	0	2	0	1	3	2	1	1	1	2	2	1	1	0	0	20	0	1	1	3	2	2	2	4	1
909	1	2	0	4	0	0	3	3	0	0	2	3	3	1	0	0	0	20	0	1	0	3	3	3	3	6	0
910	1	1	0	2	2	0	2	2	0	0	2	2	2	1	0	0	0	20	0	1	0	2	2	2	2	4	0
911	0	3	0	1	0	1	1	2	0	0	1	1	2	1	0	0	0	20	0	1	0	1	2	1	2	3	0
912	0	2	0	3	1	0	3	2	0	1	2	2	2	1	0	0	0	20	0	1	0	3	2	2	2	4	0
913	0	4	0	3	3	1		1	1	1	2	3	3	1	1	0	0	20	0	1	1		1	3	3	6	1
914	1	3	0	3	0	1	3	2	0	0	2	3	2	1	0	0	0	20	0	1	0	3	2	3	2	5	0
915	0	2	0	3	1	1	3	3	1	1	2	2	2	1	0	0	0	20	0	1	0	3	3	2	2	4	0
916	1	5	0	2	1	0	3	2	1	0	2	2	2	1	0	0	0	20	0	1	0	3	2	2	2	4	0
917	0	4	0	4	0	0	2	1	0	1	2	2	2	1	0	0	1	20	0	1	1	2	1	2	2	4	1
918	0	4	0	1	0	0	2	1	0	0	2	2	1	1	0	0	0	20	0	1	0	2	1	2	1	3	0
919	0	5	0	1	0	1	2	1	0	1	2	2	2	1	0	0	0	20	0	1	0	2	1	2	2	4	0
920	1	1	0	4	2	0	3	1	0	0	2	3	2	1	0	0	0	20	0	1	0	3	1	3	2	5	0
921	1	1	0	2	4	1	2	2	1	1	1	2	1	1	0	1	0	20	0	1	1	2	2	2	1	3	1
922	1	5	0	2	1	0	2	1	1	0	2	2	2	1	0	0	0	20	0	1	0	2	1	2	2	4	0
923	1	1	0	3	1	1	3	2	1	1	1	3	3	1	0	0	1	20	0	1	1	3	2	3	3	6	1
924	1	1	0	2	2	0	2	2	0	0	2	2	2	1	0	0	0	20	0	1	0	2	2	2	2	4	0
925	0	1	0	3	3	0	3	3	1	0	2	3	3	1	1	0	0	20	0	1	1	3	3	3	3	6	1
926	0	1	0	1	0	1	1	1	0	1	0	2	2	1	1	0	0	20	0	1	1	1	1	2	2	4	1
927	1	2	0	3	3	0	3	2	0	1	2	2	2	1	0	0	0	20	0	1	0	3	2	2	2	4	0
928	1	4	0	2	4	0	2	2	0	0	2	2	1	1	0	0	0	20	0	1	0	2	2	2	1	3	0
929	0	1	0	2	3	1	2	2	1	1	2	3	3	1	1	0	0	20	0	1	1	2	2	3	3	6	1
930	1	4	0	2	4	0	2	2	0	0	2	2	1	1	0	0	0	20	0	1	0	2	2	2	1	3	0
931	1	4	0	1	0	1	2	1	0	0	2	3	2	1	0	0	0	20	0	1	0	2	1	3	2	5	0
932	1	1	0	4	0	0	3	3	0	0	2	3	3	1	0	0	0	20	0	1	0	3	3	3	3	6	0
933	0	2	0	3	0	1	2	3	0	0	2	3	3	1	1	0	0	20	0	1	1	2	3	3	3	6	1
934	0	4	0	3	3	1		1	1	1	2	3	3	1	1	0	0	20	0	1	1		1	3	3	6	1
935	0	1	0	1	0	0	3	2	1	1	2	3	3	1	0	0	1	20	0	1	1	3	2	3	3	6	1
936	0	1	0	1	0	1	2	1	0	0	0	2	2	1	1	0	0	20	0	1	1	2	1	2	2	4	1
937	1	1	0	4	1	0	3	2	0	0	2	2	2	1	0	0	0	20	0	1	0	3	2	2	2	4	0
938	0	2	0	2	3	0	2	1	1	1	1	2	3	1	0	0	1	20	0	1	1	2	1	2	3	5	1
939	1	1	0	4	2	0	3	2	0	0	2	3	2	1	0	0	0	20	0	1	0	3	2	3	2	5	0
940	1	4	0	2	3	0	2	2	0	0	2	2	1	1	0	0	0	20	0	1	0	2	2	2	1	3	0
941	0	4	0	1	0	0	2	2	1	1	2	2	2	1	1	0	0	20	0	1	1	2	2	2	2	4	1
942	1	5	0	3	1	0	3	3	1	1	2	3	3	1	0	0	0	20	0	1	0	3	3	3	3	6	0
943	1	2	0	3	2	0	3	2	0	1	2	3	3	1	0	0	0	20	0	1	0	3	2	3	3	6	0
944	1	5	0	2	1	0	2	1	1	0	2	2	2	1	0	0	0	20	0	1	0	2	1	2	2	4	0
945	1	4	0	3	2	0	3	2	0	1	2	3	3	1	0	0	0	20	0	1	0	3	2	3	3	6	0
946	0	2	0	4	0	0	3	3	0	0	2	3	3	1	0	0	0	20	0	1	0	3	3	3	3	6	0
947	1	1	0	2	1	0	2	2	0	0	2	2	2	1	0	0	0	20	0	1	0	2	2	2	2	4	0
948	1	1	0	3	2	0	3	1	0	1	2	3	3	1	0	0	0	20	0	1	0	3	1	3	3	6	0
949	0	5	0	1	1	0	3	3	1	0	2	3	3	1	0	0	0	20	0	1	0	3	3	3	3	6	0
950	1	2	0	3	2	0	3	2	1	1	2	3	2	1	0	0	1	20	0	1	1	3	2	3	2	5	1
951	0	5	0	2	3	0	2	2	1	1	1	2	2	1	1	0	0	20	0	1	1	2	2	2	2	4	1
952	0	4	0	2	3	1	2	1	1	1	1	2	2	1	0	1	0	20	0	1	1	2	1	2	2	4	1
953	1	3	0	1	0	0	2	1	0	0	2	2	2	1	1	0	0	20	0	1	1	2	1	2	2	4	1
954	1	1	0	4	0	0	3	2	0	0	2	2	2	1	0	0	0	20	0	1	0	3	2	2	2	4	0
955	1	5	0	2	4	0	3	3	0	0	2	3	2	1	0	0	0	20	0	1	0	3	3	3	2	5	0
956	1	3	0	3	1	0	4	1	0	0	2	4	4	1	0	0	0	20	0	1	0	3	1	3	3	6	0
957	1	2	0	4	0	0	3	3	0	0	2	3	3	1	0	0	0	20	0	1	0	3	3	3	3	6	0
958	1	3	0	2	2	0		2	0	0	2	3	3	1	0	0	0	20	0	1	0		2	3	3	6	0
959	1	1	0	3	1	0	3	2	0	1	2	3	3	1	0	0	0	20	0	1	0	3	2	3	3	6	0
960	0	4	0	1	0	0	3	2	0	1	2	3	2	1	1	0	0	20	0	1	1	3	2	3	2	5	1
961	0	2	0	2	0	0	3	2	0	1	2	2	2	1	1	0	0	20	0	1	1	3	2	2	2	4	1
962	0	4	0	1	0	1	2	1	0	0	1	2	2	1	0	0	0	20	0	1	0	2	1	2	2	4	0
963	0	4	0	2	0	0	2	1	0	1	2	2	2	1	1	0	0	20	0	1	1	2	1	2	2	4	1
964	1	4	0	1	0	0	2	1	0	1	2	2	2	1	0	0	0	20	0	1	0	2	1	2	2	4	0
965	0	3	0	2	0	1		2	0	1	2	3	3	1	1	0	0	20	0	1	1		2	3	3	6	1
966	1	2	0	3	0	0	3	2	0	0	2	2	2	1	0	0	0	20	0	1	0	3	2	2	2	4	0
967	0	5	0	2	0	1	3	2	0	1	1	2	2	1	0	0	0	20	0	1	0	3	2	2	2	4	0
968	1	1	0	1	1	1	2	2	0	1	1	2	2	1	0	0	1	20	0	1	1	2	2	2	2	4	1
969	0	2	0	4	1	0	3	3	0	0	2	3	3	1	0	0	0	20	0	1	0	3	3	3	3	6	0
970	0	5	0	1	0	1	2	1	0	0	2	2	2	1	0	0	0	20	0	1	0	2	1	2	2	4	0
971	1	5	0	3	1	0	3	3	1	1	2	3	3	1	0	0	0	20	0	1	0	3	3	3	3	6	0
972	1	1	0	4	2	0	3	2	0	0	2	3	2	1	0	0	0	20	0	1	0	3	2	3	2	5	0
973	1	3	0	2	2	1	3	3	0	1	2	3	3	1	1	0	0	20	0	1	1	3	3	3	3	6	1
974	1	4	0	1	0	0	3	1	0	0	2	3	2	1	0	0	0	20	0	1	0	3	1	3	2	5	0
975	0	4	0	1	3	0		1	1	0	2	3	3	1	0	0	0	20	0	1	0		1	3	3	6	0
976	0	4	0	2	0	1	1	1	0	1	2	2	2	1	0	0	0	20	0	1	0	1	1	2	2	4	0
977	1	1	0	3	0	0	3	2	0	1	2	3	3	1	0	0	0	20	0	1	0	3	2	3	3	6	0
978	1	3	0	2	2	0	3	1	0	0	2	3	3	1	0	0	0	20	0	1	0	3	1	3	3	6	0
979	1	1	0	2	2	0	2	2	0	0	2	2	2	1	0	0	0	20	0	1	0	2	2	2	2	4	0
980	0	4	0	4	0	0	2	1	0	1	2	2	2	1	0	0	1	20	0	1	1	2	1	2	2	4	1
981	1	1	0	1	0	0	2	2	1	0	1	2	2	1	0	0	1	20	0	1	1	2	2	2	2	4	1
982	0	1	0	1	3	0	3	2	0	1	2	3	3	1	0	0	1	20	0	1	1	3	2	3	3	6	1
983	0	1	0	2	0	1	2	2	1	1	1	3	3	1	0	0	1	20	0	1	1	2	2	3	3	6	1
984	1	1	0	3	2	0	3	2	1	1	2	3	3	1	0	0	0	20	0	1	0	3	2	3	3	6	0
985	1	1	0	3	0	0	3	2	1	0	2	3	3	1	0	0	0	20	0	1	0	3	2	3	3	6	0
986	1	4	0	2	2	0	3	2	0	0	2	3	2	1	0	0	0	20	0	1	0	3	2	3	2	5	0
987	0	1	0	3	0	0	3	3	0	1	2	3	3	1	0	0	0	20	0	1	0	3	3	3	3	6	0
988	0	5	0	2	0	1	3	2	0	1	1	2	2	1	0	0	0	20	0	1	0	3	2	2	2	4	0
989	0	1	0	3	3	0	3	3	1	0	2	3	3	1	1	0	0	20	0	1	1	3	3	3	3	6	1
990	0	2	0	3	1	1	3	3	0	1	2	2	2	1	0	0	0	20	0	1	0	3	3	2	2	4	0
991	0	2	0	2	0	0	4	2	1	1	2	3	2	1	0	0	1	20	0	1	1	3	2	3	2	5	1
992	1	1	0	3	2	0	3	2	0	0	2	3	3	1	0	0	0	20	0	1	0	3	2	3	3	6	0
993	0	4	0	2	0	0	3	1	0	0	2	3	3	1	0	0	0	20	0	1	0	3	1	3	3	6	0
994	0	3	0	2	0	1	3	3	1	1	2	3	3	1	1	0	0	20	0	1	1	3	3	3	3	6	1
995	1	1	0	2	2	1	2	2	0	0	2	3	3	1	1	0	0	20	0	1	1	2	2	3	3	6	1
996	1	1	0	3	2	0	3	1	0	1	2	3	3	1	0	0	0	20	0	1	0	3	1	3	3	6	0
997	0	2	0	3	4	0	3	3	0	0	2	3	3	1	0	0	0	20	0	1	0	3	3	3	3	6	0
998	0	1	0	2	3	1	3	3	0	1	2	3	3	1	1	0	0	20	0	1	1	3	3	3	3	6	1
999	0	4	0	3	3	1		2	0	1	2	3	3	1	0	0	0	20	0	1	0		2	3	3	6	0
1000	1	1	0	2	2	0	2	2	0	0	2	2	2	1	0	0	0	20	0	1	0	2	2	2	2	4	0
1001	1	1	0	1	1	1	2	2	0	1	1	2	2	1	0	0	1	20	0	1	1	2	2	2	2	4	1
1002	0	4	0	3	3	1		1	1	1	2	3	3	1	1	0	0	20	0	1	1		1	3	3	6	1
1003	0	1	0	2	0	1	2	2	1	1	1	2	2	1	0	0	1	20	0	1	1	2	2	2	2	4	1
1004	0	4	0	3	1	0	3	2	0	1	2	3	3	1	0	0	0	20	0	1	0	3	2	3	3	6	0
1005	0	4	0	2	3	1		1	1	1	1	3	3	1	0	0	1	20	0	1	1		1	3	3	6	1
1006	0	4	0	3	3	1		1	1	1	2	3	3	1	1	0	0	20	0	1	1		1	3	3	6	1
1007	1	1	0	2	1	1	2	2	0	1	0	2	2	1	1	0	0	20	0	1	1	2	2	2	2	4	1
1008	1	4	0	1	2	0	1	1	0	0	2	2	2	1	0	0	0	20	0	1	0	1	1	2	2	4	0
1009	1	1	0	4	0	0	3	3	0	0	2	3	3	1	0	0	0	20	0	1	0	3	3	3	3	6	0
1010	0	5	0	3	4	1	1	1	0	1	1	1	2	1	0	0	1	20	0	1	1	1	1	1	2	3	1
1011	0	4	0	1	3	0		2	1	0	1	3	3	1	1	0	0	20	0	1	1		2	3	3	6	1
1012	0	4	0	3	4	0	2	2	0	0	2	2	2	1	0	0	0	20	0	1	0	2	2	2	2	4	0
1013	0	4	0	3	3	0		1	1	1	1	3	3	1	0	0	1	20	0	1	1		1	3	3	6	1
1014	0	1	0	2	0	0	3	2	1	0	1	3	2	1	0	0	1	20	0	1	1	3	2	3	2	5	1
1015	0	2	0	2	0	1	3	2	1	1	1	2	2	1	0	0	1	20	0	1	1	3	2	2	2	4	1
1016	1	3	0	2	2	0	3	1	0	0	2	3	3	1	0	0	0	20	0	1	0	3	1	3	3	6	0
1017	1	5	0	2	3	0	1	2	1	1	1	2	2	1	1	0	0	20	0	1	1	1	2	2	2	4	1
1018	1	2	0	2	2	1	3	2	0	0	2	2	2	1	1	0	0	20	0	1	1	3	2	2	2	4	1
1019	1	2	0	3	0	0	3	2	0	0	2	2	2	1	0	0	0	20	0	1	0	3	2	2	2	4	0
1020	0	1	0	3	3	0	3	3	1	0	2	3	3	1	1	0	0	20	0	1	1	3	3	3	3	6	1
1021	0	2	0	1	3	0	1	2	1	1	1	2	2	1	1	0	0	20	0	1	1	1	2	2	2	4	1
1022	0	4	0	2	0	1		1	1	1	1	3	3	1	0	0	1	20	0	1	1		1	3	3	6	1
1023	1	2	0	4	0	0	3	3	0	0	2	3	3	1	0	0	0	20	0	1	0	3	3	3	3	6	0
1024	0	3	0	3	0	0	4	2	1	1	2	4	2	1	1	0	0	20	0	1	1	3	2	3	2	5	1
1025	0	1	0	2	1	0	2	1	0	0	2	2	3	1	1	0	0	20	0	1	1	2	1	2	3	5	1
1026	0	2	0	4	1	1	3	1	1	1	1	3	2	1	0	0	1	20	0	1	1	3	1	3	2	5	1
1027	0	2	0	2	3	0	1	2	0	1	2	2	2	1	0	0	1	20	0	1	1	1	2	2	2	4	1
1028	0	4	0	1	0	1		1	0	1	1	3	3	1	0	0	0	20	0	1	0		1	3	3	6	0
1029	0	4	0	3	3	0		1	0	1	2	3	3	1	0	0	0	20	0	1	0		1	3	3	6	0
1030	0	4	0	1	1	0	3	2	0	0	2	2	1	1	0	0	0	20	0	1	0	3	2	2	1	3	0
1031	0	3	0	1	3	0	1	2	1	0	1	1	2	1	1	0	0	20	0	1	1	1	2	1	2	3	1
1032	0	2	0	2	3	0	2	2	0	1	2	2	2	1	0	0	1	20	0	1	1	2	2	2	2	4	1
1033	1	5	0	4	1	0	1	1	1	1	2	1	2	1	0	0	0	20	0	1	0	1	1	1	2	3	0
1034	0	4	0	2	3	1	2	1	1	1	1	2	2	1	0	1	0	20	0	1	1	2	1	2	2	4	1
1035	0	2	0	3	3	1	3	2	1	1	2	3	3	1	1	0	0	20	0	1	1	3	2	3	3	6	1
1036	1	2	0	2	1	1	1	2	1	1	1	2	2	1	0	0	1	20	0	1	1	1	2	2	2	4	1
1037	0	1	0	4	1	0	3	3	0	0	2	3	3	1	0	0	0	20	0	1	0	3	3	3	3	6	0
1038	0	3	0	3	3	1	3	3	1	1	2	3	3	1	1	0	0	20	0	1	1	3	3	3	3	6	1
1039	0	2	0	3	1	0	3	2	0	1	2	2	2	1	0	0	0	20	0	1	0	3	2	2	2	4	0
1040	0	3	0	1	0	0	1	2	0	1	2	1	2	1	1	0	0	20	0	1	1	1	2	1	2	3	1
1041	0	2	0	1	3	0	1	2	1	0	1	2	2	1	0	1	0	20	0	1	1	1	2	2	2	4	1
1042	0	2	0	3	0	1	3	3	0	1	2	2	2	1	0	0	0	20	1	1	0	3	3	2	2	4	1
1043	0	5	0	3	3	0	1	1	1	0	1	1	2	1	1	0	0	20	0	1	1	1	1	1	2	3	1
1044	0	4	0	3	3	0		1	1	1	1	3	3	1	0	0	1	20	0	1	1		1	3	3	6	1
1045	0	5	0	2	0	1	3	2	1	1	1	3	2	1	1	0	0	20	0	1	1	3	2	3	2	5	1
1046	0	4	0	1	0	0	2	1	1	0	2	2	2	1	1	0	0	20	0	1	1	2	1	2	2	4	1
1047	1	5	0	3	1	0	3	3	1	1	2	3	3	1	0	0	0	20	0	1	0	3	3	3	3	6	0
1048	1	1	0	3	2	0	3	2	1	1	2	3	3	1	0	0	0	20	0	1	0	3	2	3	3	6	0
1049	0	4	0	1	3	0		2	1	1	1	3	3	1	1	0	0	20	0	1	1		2	3	3	6	1
1050	0	1	0	1	0	1	1	1	1	1	2	2	2	1	0	0	0	20	0	1	0	1	1	2	2	4	0
1051	1	4	0	1	2	0	2	1	0	0	2	2	2	1	0	0	0	20	0	1	0	2	1	2	2	4	0
1052	1	5	0	2	1	0	3	2	1	0	2	3	3	1	0	0	0	20	0	1	0	3	2	3	3	6	0
1053	0	5	0	2	0	1	3	2	0	1	1	2	2	1	0	0	0	20	0	1	0	3	2	2	2	4	0
1054	0	4	0	3	3	1		1	1	1	2	3	3	1	1	0	0	20	1	1	1		1	3	3	6	2
1055	0	4	0	1	0	0	2	2	0	0	2	2	1	1	0	0	0	20	0	1	0	2	2	2	1	3	0
1056	0	2	0	3	3	1	3	2	1	1	2	3	3	1	1	0	0	20	0	1	1	3	2	3	3	6	1
1057	0	2	0	1	4	0	3	1	1	1	2	3	2	1	0	1	0	20	0	1	1	3	1	3	2	5	1
1058	0	5	0	3	1	0	3	2	1	1	2	1	2	1	0	0	0	20	0	1	0	3	2	1	2	3	0
1059	1	2	0	4	0	0	3	3	0	0	2	3	3	1	0	0	0	20	0	1	0	3	3	3	3	6	0
1060	1	2	0	3	0	0	3	2	0	0	2	2	2	1	0	0	0	20	0	1	0	3	2	2	2	4	0
1061	0	4	0	2	0	1		1	1	1	1	3	3	1	0	0	1	20	0	1	1		1	3	3	6	1
1062	0	2	0	1	3	0	1	2	1	1	2	2	2	1	1	0	0	20	0	1	1	1	2	2	2	4	1
1063	0	3	0	2	0	0	3	3	0	1	2	3	3	1	1	0	0	20	0	1	1	3	3	3	3	6	1
1064	1	1	0	3	0	0	3	1	0	0	2	3	3	1	0	0	0	20	0	1	0	3	1	3	3	6	0
1065	0	5	0	1	3	1	2	2	0	1	1	2	2	1	0	0	1	20	0	1	1	2	2	2	2	4	1
1066	1	3	0	3	0	0	3	3	0	0	2	3	3	1	0	0	0	20	0	1	0	3	3	3	3	6	0
1067	0	4	0	2	0	1		1	1	1	1	3	3	1	0	0	1	20	0	1	1		1	3	3	6	1
1068	0	2	0	2	0	1	3	2	1	1	1	2	2	1	0	0	1	20	0	1	1	3	2	2	2	4	1
1069	0	4	0	2	3	1		1	1	1	1	3	3	1	0	0	1	20	0	1	1		1	3	3	6	1
1070	0	4	0	3	2	0	3	2	0	0	2	3	2	1	0	0	0	20	0	1	0	3	2	3	2	5	0
1071	0	5	0	1	1	0	3	3	1	0	2	3	3	1	0	0	0	20	0	1	0	3	3	3	3	6	0
1072	1	2	0	3	2	0	3	3	1	0	2	3	3	1	0	0	0	20	0	1	0	3	3	3	3	6	0
1073	0	1	0	2	4	0	2	2	0	0	2	2	2	1	0	0	1	20	0	1	1	2	2	2	2	4	1
1074	1	1	0	4	2	0	3	2	0	0	2	3	2	1	0	0	0	20	0	1	0	3	2	3	2	5	0
1075	1	2	0	3	0	0	3	3	0	0	2	3	3	1	0	0	0	20	0	1	0	3	3	3	3	6	0
1076	0	4	0	1	0	0	2	1	1	0	2	2	2	1	1	0	0	20	0	1	1	2	1	2	2	4	1
1077	1	2	0	4	0	0	3	3	0	0	2	3	3	1	0	0	0	20	0	1	0	3	3	3	3	6	0
1078	0	1	0	3	3	1	3	3	1	1	2	3	3	1	1	0	0	20	0	1	1	3	3	3	3	6	1
1079	1	1	0	3	0	0	3	2	0	0	2	2	2	1	0	0	0	20	0	1	0	3	2	2	2	4	0
1080	1	2	0	3	0	0	3	2	0	0	2	2	2	1	0	0	0	20	0	1	0	3	2	2	2	4	0
1081	0	2	0	4	0	0	3	3	0	0	2	3	3	1	0	0	0	20	0	1	0	3	3	3	3	6	0
1082	0	3	0	2	0	1		2	1	1	1	3	3	1	0	0	1	20	0	1	1		2	3	3	6	1
1083	0	3	0	3	4	1	2	1	1	1	0	2	1	1	0	1	0	20	0	1	1	2	1	2	1	3	1
1084	1	3	0	3	2	0	3	3	0	0	2	3	3	1	0	0	0	20	0	1	0	3	3	3	3	6	0
1085	1	3	0	4	0	0	3	3	0	0	2	3	3	1	0	0	0	20	0	1	0	3	3	3	3	6	0
1086	0	5	0	1	3	1	2	1	0	1	1	2	2	1	0	0	1	20	0	1	1	2	1	2	2	4	1
1087	0	3	0	2	0	1		2	1	1	1	3	3	1	0	0	1	20	0	1	1		2	3	3	6	1
1088	1	2	0	3	2	0	3	2	0	0	2	2	2	1	0	0	0	20	0	1	0	3	2	2	2	4	0
1089	1	2	0	4	0	0	3	3	0	0	2	3	3	1	0	0	0	20	0	1	0	3	3	3	3	6	0
1090	1	3	0	2	2	0		2	0	0	2	3	3	1	0	0	0	20	0	1	0		2	3	3	6	0
1091	1	2	0	3	0	0	3	2	0	0	2	3	3	1	0	0	0	20	0	1	0	3	2	3	3	6	0
1092	1	4	0	2	1	1		1	1	1	1	3	3	1	0	0	1	20	0	1	1		1	3	3	6	1
1093	0	5	0	1	0	1	2	1	0	1	2	2	2	1	0	0	0	20	0	1	0	2	1	2	2	4	0
1094	1	3	0	3	1	0	3	3	0	0	2	3	2	1	0	0	0	20	0	1	0	3	3	3	2	5	0
1095	1	3	0	2	0	1		2	1	1	2	3	3	1	0	0	0	20	0	1	0		2	3	3	6	0
1096	1	2	0	3	1	1	3	2	0	1	2	2	2	1	0	0	0	20	0	1	0	3	2	2	2	4	0
1097	0	1	0	1	3	0	1	2	1	0	2	1	1	1	0	0	0	20	0	1	0	1	2	1	1	2	0
1098	0	1	0	2	1	0	2	2	0	0	2	2	2	1	0	0	0	20	0	1	0	2	2	2	2	4	0
1099	0	5	0	2	0	1	3	2	1	1	1	2	2	1	0	0	0	20	0	1	0	3	2	2	2	4	0
1100	1	1	0	4	0	0	3	2	0	0	2	2	2	1	0	0	0	20	0	1	0	3	2	2	2	4	0
1101	1	3	0	3	0	0		2	0	1	2	3	3	1	0	0	0	20	0	1	0		2	3	3	6	0
1102	1	3	0	3	0	0	3	2	0	0	2	4	2	1	0	0	0	20	0	1	0	3	2	3	2	5	0
1103	1	4	0	2	4	0	2	2	0	0	2	2	1	1	0	0	0	20	0	1	0	2	2	2	1	3	0
1104	0	3	0	3	4	0	3	2	1	0	2	3	3	1	0	1	0	20	0	1	1	3	2	3	3	6	1
1105	1	3	0	2	2	1	3	3	0	1	2	3	3	1	1	0	0	20	0	1	1	3	3	3	3	6	1
1106	0	1	0	1	3	0	2	2	1	1	2	2	2	1	1	0	0	20	0	1	1	2	2	2	2	4	1
1107	1	1	0	3	0	0	3	2	1	0	2	3	3	1	0	0	0	20	0	1	0	3	2	3	3	6	0
1108	1	1	0	2	2	0	2	2	0	0	2	2	2	1	0	0	0	20	0	1	0	2	2	2	2	4	0
1109	0	4	0	3	4	0	2	2	0	0	2	2	2	1	0	0	0	20	0	1	0	2	2	2	2	4	0
1110	1	3	0	2	2	0		2	1	1	2	3	3	1	0	0	1	20	0	1	1		2	3	3	6	1
1111	0	3	0	1	3	0	3	3	1	1	2	3	3	1	1	0	0	20	0	1	1	3	3	3	3	6	1
1112	0	1	0	4	1	0	3	2	0	1	2	2	2	1	0	0	0	20	0	1	0	3	2	2	2	4	0
1113	1	3	0	2	2	0		2	0	0	2	3	3	1	0	0	0	20	0	1	0		2	3	3	6	0
1114	1	4	0	1	2	0	2	1	0	0	2	2	2	1	0	0	0	20	0	1	0	2	1	2	2	4	0
1115	0	4	0	1	0	0	3	1	0	1	2	3	2	1	1	0	0	20	0	1	1	3	1	3	2	5	1
1116	0	3	0	2	0	1	3	1	1	1	2	3	2	1	1	0	0	20	0	1	1	3	1	3	2	5	1
1117	0	4	0	3	3	1		1	1	1	2	3	3	1	1	0	0	20	0	1	1		1	3	3	6	1
1118	0	5	0	2	4	0	3	2	0	0	2	2	2	1	0	0	0	20	0	1	0	3	2	2	2	4	0
1119	0	2	0	1	2	0	1	2	1	0	2	2	2	1	0	0	0	20	0	1	0	1	2	2	2	4	0
1120	0	2	0	3	3	0	2	1	0	1	2	2	2	1	0	0	1	20	0	1	1	2	1	2	2	4	1
1121	0	2	0	3	3	0	3	2	0	1	2	3	3	1	0	0	0	20	0	1	0	3	2	3	3	6	0
1122	1	4	0	2	0	0	2	1	0	1	2	2	2	1	0	0	0	20	0	1	0	2	1	2	2	4	0
1123	0	1	0	2	0	1	2	2	1	1	1	3	3	1	0	0	1	20	0	1	1	2	2	3	3	6	1
1124	0	2	0	4	3	0	2	1	1	1	2	2	2	1	0	1	0	20	0	1	1	2	1	2	2	4	1
1125	1	2	0	3	2	1	3	3	0	1	2	2	2	1	0	0	0	20	0	1	0	3	3	2	2	4	0
1126	0	4	0	1	3	0		1	1	0	2	3	3	1	0	0	0	20	0	1	0		1	3	3	6	0
1127	0	2	0	2	3	0	3	3	0	1	2	3	2	1	0	0	1	20	0	1	1	3	3	3	2	5	1
1128	0	1	0	1	3	0	1	2	1	0	2	1	1	1	0	0	0	20	0	1	0	1	2	1	1	2	0
1129	0	4	0	3	2	0	3	2	0	0	2	3	2	1	0	0	0	20	0	1	0	3	2	3	2	5	0
1130	0	2	0	3	3	0	3	2	1	0	2	3	3	1	1	0	0	20	0	1	1	3	2	3	3	6	1
1131	1	1	0	4	2	0	3	1	0	0	2	3	2	1	0	0	0	20	0	1	0	3	1	3	2	5	0
1132	1	1	0	3	0	0	3	2	0	0	2	3	3	1	0	0	0	20	0	1	0	3	2	3	3	6	0
1133	0	1	0	4	1	0	3	1	0	0	2	3	2	1	0	0	0	20	0	1	0	3	1	3	2	5	0
1134	1	3	0	2	0	0	2	1	0	0	2	2	2	1	0	0	0	20	0	1	0	2	1	2	2	4	0
1135	0	2	0	2	0	1	3	2	0	0	2	2	2	1	1	0	0	20	0	1	1	3	2	2	2	4	1
1136	0	1	0	1	0	0	2	2	0	1	2	2	2	1	0	0	0	20	0	1	0	2	2	2	2	4	0
1137	0	2	0	2	3	0	3	1	1	1	1	3	3	1	0	0	1	20	0	1	1	3	1	3	3	6	1
1138	0	2	0	3	3	1	3	2	1	1	2	3	3	1	1	0	0	20	0	1	1	3	2	3	3	6	1
1139	0	1	0	3	1	1	3	3	0	1	0	3	3	1	1	0	0	20	0	1	1	3	3	3	3	6	1
1140	1	2	0	3	0	0	3	2	0	0	2	2	2	1	0	0	0	20	0	1	0	3	2	2	2	4	0
1141	0	1	0	3	0	0	3	2	0	1	2	3	3	1	0	0	0	20	0	1	0	3	2	3	3	6	0
1142	1	2	0	3	2	0	3	3	1	0	2	3	3	1	0	0	0	20	0	1	0	3	3	3	3	6	0
1143	1	1	0	3	4	0	3	3	0	1	2	3	3	1	0	0	0	20	0	1	0	3	3	3	3	6	0
1144	1	2	0	3	0	0	3	2	0	0	2	2	2	1	0	0	0	20	0	1	0	3	2	2	2	4	0
1145	0	5	0	1	1	0	2	1	1	0	2	2	2	1	0	0	0	20	0	1	0	2	1	2	2	4	0
1146	1	5	0	2	3	0	1	2	1	1	1	2	2	1	1	0	0	20	0	1	1	1	2	2	2	4	1
1147	1	2	0	3	0	0	3	2	0	0	2	2	2	1	0	0	0	20	0	1	0	3	2	2	2	4	0
1148	0	1	0	4	0	0	3	2	0	0	2	2	2	1	0	0	0	20	0	1	0	3	2	2	2	4	0
1149	0	5	0	1	1	0	3	3	1	0	2	3	3	1	0	0	0	20	0	1	0	3	3	3	3	6	0
1150	0	4	0	1	3	0		1	1	1	2	3	3	1	1	0	0	20	0	1	1		1	3	3	6	1
1151	0	5	0	2	3	0	2	1	0	0	2	2	1	1	0	0	0	20	0	1	0	2	1	2	1	3	0
1152	1	2	0	4	0	0	3	3	0	0	2	3	3	1	0	0	0	20	0	1	0	3	3	3	3	6	0
1153	0	1	0	4	0	0	3	2	0	0	2	2	2	1	0	0	0	20	0	1	0	3	2	2	2	4	0
1154	0	5	0	1	0	1	2	1	0	0	2	2	2	1	0	0	0	20	0	1	0	2	1	2	2	4	0
1155	0	3	0	3	3	0	3	3	1	1	2	3	3	1	1	0	0	20	0	1	1	3	3	3	3	6	1
1156	1	2	0	4	0	0	3	3	1	0	2	3	3	1	0	0	0	20	0	1	0	3	3	3	3	6	0
1157	0	2	0	3	0	1	2	1	0	1	2	2	2	1	0	0	0	20	1	1	0	2	1	2	2	4	1
1158	0	2	0	2	0	1	3	2	1	1	1	2	2	1	0	0	1	20	0	1	1	3	2	2	2	4	1
1159	1	1	0	2	2	0	2	2	0	0	2	2	2	1	0	0	0	20	0	1	0	2	2	2	2	4	0
1160	0	2	0	3	3	0	2	1	0	1	2	2	2	1	0	0	1	20	0	1	1	2	1	2	2	4	1
1161	0	4	0	1	3	0		2	0	1	2	3	3	1	0	0	1	20	0	1	1		2	3	3	6	1
1162	0	4	0	2	3	1	2	1	1	1	1	2	2	1	0	1	0	20	0	1	1	2	1	2	2	4	1
1163	0	3	0	2	0	1		2	1	1	1	3	3	1	0	0	1	20	0	1	1		2	3	3	6	1
1164	1	1	0	3	4	0	3	3	0	1	2	3	3	1	0	0	0	20	0	1	0	3	3	3	3	6	0
1165	1	3	0	3	2	0	3	3	0	0	2	3	3	1	0	0	0	20	0	1	0	3	3	3	3	6	0
1166	0	4	0	3	1	0	3	2	0	0	2	3	2	1	0	0	0	20	0	1	0	3	2	3	2	5	0
1167	0	2	0	3	3	0	3	2	1	0	2	3	3	1	1	0	0	20	0	1	1	3	2	3	3	6	1
1168	1	1	0	2	2	1	2	2	0	0	2	2	2	1	1	0	0	20	0	1	1	2	2	2	2	4	1
1169	0	2	0	4	0	0	3	3	0	0	2	3	3	1	0	0	0	20	0	1	0	3	3	3	3	6	0
1170	0	1	0	4	0	1	3	2	0	0	2	2	2	1	0	0	0	20	0	1	0	3	2	2	2	4	0
1171	1	3	0	1	0	0	3	3	1	0	2	3	3	1	0	0	0	20	0	1	0	3	3	3	3	6	0
1172	0	4	0	2	0	0	3	3	0	1	2	3	2	1	0	0	1	20	0	1	1	3	3	3	2	5	1
1173	1	3	0	2	0	0		2	0	0	2	3	3	1	0	0	0	20	0	1	0		2	3	3	6	0
1174	0	1	0	1	3	0	2	2	1	1	2	2	2	1	1	0	0	20	0	1	1	2	2	2	2	4	1
1175	0	2	0	3	1	1	3	3	1	1	2	2	2	1	0	0	0	20	0	1	0	3	3	2	2	4	0
1176	1	1	0	3	0	0	3	2	0	0	2	2	2	1	0	0	0	20	0	1	0	3	2	2	2	4	0
1177	1	2	0	3	0	0	3	2	0	0	2	2	2	1	0	0	0	20	0	1	0	3	2	2	2	4	0
1178	1	5	0	2	1	0	3	2	1	0	2	3	3	1	0	0	0	20	0	1	0	3	2	3	3	6	0
1179	0	3	0	3	3	0	3	3	1	1	2	3	3	1	1	0	0	20	0	1	1	3	3	3	3	6	1
1180	0	1	0	2	0	0	2	2	0	1	2	3	3	1	1	0	0	20	0	1	1	2	2	3	3	6	1
1181	1	5	0	2	1	0	2	1	1	0	2	2	2	1	0	0	0	20	0	1	0	2	1	2	2	4	0
1182	0	3	0	1	0	1	1	2	0	0	1	1	2	1	0	0	0	20	0	1	0	1	2	1	2	3	0
1183	0	3	0	1	3	0	1	2	1	0	2	1	2	1	1	0	0	20	0	1	1	1	2	1	2	3	1
1184	1	1	0	3	0	0	3	1	0	0	2	3	3	1	0	0	0	20	0	1	0	3	1	3	3	6	0
1185	0	4	0	1	0	0		2	0	1	2	3	3	1	0	0	1	20	0	1	1		2	3	3	6	1
1186	1	1	0	3	0	0	3	2	0	0	2	3	3	1	0	0	0	20	0	1	0	3	2	3	3	6	0
1187	1	2	0	4	0	0	3	3	0	0	2	3	3	1	0	0	0	20	0	1	0	3	3	3	3	6	0
1188	0	4	0	2	3	1	2	1	1	1	1	2	2	1	0	1	0	20	0	1	1	2	1	2	2	4	1
1189	0	1	0	4	0	0	3	2	0	0	2	2	2	1	0	0	0	20	0	1	0	3	2	2	2	4	0
1190	1	3	0	3	0	0	3	2	0	1	2	3	3	1	0	0	0	20	0	1	0	3	2	3	3	6	0
1191	1	2	0	3	2	0	3	2	0	0	2	2	2	1	0	0	0	20	0	1	0	3	2	2	2	4	0
1192	1	4	0	2	1	1		1	1	1	1	3	3	1	0	0	1	20	0	1	1		1	3	3	6	1
1193	1	4	0	1	0	1	2	1	1	0	2	2	1	1	0	0	0	20	0	1	0	2	1	2	1	3	0
1194	0	4	0	2	0	1		1	1	1	1	3	3	1	0	0	1	20	0	1	1		1	3	3	6	1
1195	1	4	0	3	2	0	3	2	0	1	2	3	3	1	0	0	0	20	0	1	0	3	2	3	3	6	0
1196	1	1	0	3	0	0	3	3	0	0	2	3	3	1	0	0	0	20	0	1	0	3	3	3	3	6	0
1197	1	2	0	3	0	0	3	2	0	0	2	2	2	1	0	0	0	20	0	1	0	3	2	2	2	4	0
1198	0	1	0	4	0	0	3	2	0	0	2	2	2	1	0	0	0	20	0	1	0	3	2	2	2	4	0
1199	0	2	0	3	3	1	3	2	1	1	2	3	3	1	1	0	0	20	0	1	1	3	2	3	3	6	1
1200	1	2	0	3	0	0	3	2	0	0	2	2	2	1	0	0	0	20	0	1	0	3	2	2	2	4	0
1201	0	4	0	1	0	0	3	2	1	0	2	3	2	1	1	0	0	20	0	1	1	3	2	3	2	5	1
1202	1	3	0	4	0	0	3	3	0	0	2	3	3	1	0	0	0	20	0	1	0	3	3	3	3	6	0
1203	1	2	0	3	0	0	3	2	0	0	2	2	2	1	0	0	0	20	0	1	0	3	2	2	2	4	0
1204	0	4	0	1	0	0		2	0	1	2	3	3	1	0	0	1	20	0	1	1		2	3	3	6	1
1205	1	3	0	3	0	0		2	0	1	2	3	3	1	0	0	0	20	0	1	0		2	3	3	6	0
1206	1	5	0	2	1	0	2	1	1	0	2	2	2	1	0	0	0	20	0	1	0	2	1	2	2	4	0
1207	0	3	0	1	4	1	1	2	0	1	1	1	2	1	0	0	1	20	0	1	1	1	2	1	2	3	1
1208	0	2	0	2	0	0	3	2	0	1	2	2	2	1	1	0	0	20	0	1	1	3	2	2	2	4	1
1209	0	4	0	1	1	1	2	1	1	0	2	2	1	1	0	0	0	20	0	1	0	2	1	2	1	3	0
1210	0	4	0	1	0	0		2	0	1	2	3	3	1	0	0	1	20	0	1	1		2	3	3	6	1
1211	1	1	0	3	0	0	3	2	1	0	2	3	3	1	0	0	0	20	0	1	0	3	2	3	3	6	0
1212	1	2	0	4	0	0	3	3	0	0	2	3	3	1	0	0	0	20	0	1	0	3	3	3	3	6	0
1213	1	3	0	1	0	0	1	2	0	1	2	2	2	1	0	0	1	16	4	1	1	1	2	2	2	4	5
1214	1	2	0	3	1	1	3	2	0	1	2	2	2	1	0	0	0	20	0	1	0	3	2	2	2	4	0
1215	0	2	0	4	1	0	3	3	0	0	2	3	3	1	0	0	0	20	0	1	0	3	3	3	3	6	0
1216	0	5	0	2	0	1	3	2	1	1	1	2	2	1	0	0	0	20	0	1	0	3	2	2	2	4	0
1217	1	4	0	1	2	0	2	1	0	0	2	2	2	1	0	0	0	20	0	1	0	2	1	2	2	4	0
1218	1	2	0	3	2	0	3	3	1	1	2	3	4	1	1	0	0	20	0	1	1	3	3	3	3	6	1
1219	0	1	0	3	3	0	3	3	1	0	2	3	3	1	1	0	0	20	0	1	1	3	3	3	3	6	1
1220	0	3	0	2	0	1	3	3	1	1	2	3	3	1	1	0	0	20	0	1	1	3	3	3	3	6	1
1221	1	1	0	3	2	0	3	2	0	0	2	3	3	1	0	0	0	20	0	1	0	3	2	3	3	6	0
1222	1	2	0	3	1	1	3	2	0	1	2	2	2	1	0	0	0	20	0	1	0	3	2	2	2	4	0
1223	1	2	0	3	0	0	3	2	0	0	2	3	3	1	0	0	0	20	0	1	0	3	2	3	3	6	0
1224	1	3	0	4	0	0	3	3	0	0	2	3	3	1	0	0	0	20	0	1	0	3	3	3	3	6	0
1225	0	5	0	1	3	1	2	2	0	1	1	2	2	1	0	0	1	20	0	1	1	2	2	2	2	4	1
1226	0	5	0	3	1	0	3	1	1	1	2	3	3	1	0	0	0	20	0	1	0	3	1	3	3	6	0
1227	1	3	0	3	1	0	3	3	0	0	2	3	2	1	0	0	0	20	0	1	0	3	3	3	2	5	0
1228	0	5	0	2	0	1	3	2	1	1	1	2	2	1	1	0	0	20	0	1	1	3	2	2	2	4	1
1229	1	1	0	3	2	0	3	2	0	1	2	3	3	1	0	0	0	20	0	1	0	3	2	3	3	6	0
1230	0	3	0	1	0	1	1	2	0	1	1	1	2	1	0	0	0	20	0	1	0	1	2	1	2	3	0
1231	1	2	0	3	0	0	3	3	0	0	2	3	3	1	0	0	0	20	0	1	0	3	3	3	3	6	0
1232	1	3	0	1	0	0	3	3	1	0	2	3	3	1	0	0	0	20	0	1	0	3	3	3	3	6	0
1233	0	2	0	2	3	0	3	2	1	1	1	2	2	1	0	1	0	20	0	1	1	3	2	2	2	4	1
1234	0	3	0	3	4	0	3	3	0	0	2	3	2	1	0	0	0	20	0	1	0	3	3	3	2	5	0
1235	0	1	0	2	0	0	2	2	0	1	2	3	3	1	1	0	0	20	0	1	1	2	2	3	3	6	1
1236	0	4	0	2	3	0	2	1	1	1	1	2	1	1	0	0	1	20	0	1	1	2	1	2	1	3	1
1237	1	3	0	1	2	0	1	1	1	0	2	1	1	1	0	0	0	20	0	1	0	1	1	1	1	2	0
1238	1	1	0	3	1	0	3	3	0	1	2	3	3	1	0	0	0	20	0	1	0	3	3	3	3	6	0
1239	0	1	0	1	3	0	3	2	1	0	2	3	3	1	0	0	0	20	0	1	0	3	2	3	3	6	0
1240	0	3	0	3	1	0	3	3	0	0	2	3	2	1	0	0	0	20	0	1	0	3	3	3	2	5	0
1241	0	1	0	3	3	0	3	3	1	0	2	3	3	1	1	0	0	20	0	1	1	3	3	3	3	6	1
1242	0	4	0	1	0	0	2	2	1	0	2	2	2	1	1	0	0	20	0	1	1	2	2	2	2	4	1
1243	1	5	0	2	1	0	2	1	1	0	2	2	2	1	0	0	0	20	0	1	0	2	1	2	2	4	0
1244	1	3	0	2	1	1		2	0	1	2	3	3	1	0	0	0	20	0	1	0		2	3	3	6	0
1245	0	4	0	2	0	1		1	1	1	1	3	3	1	0	0	1	20	0	1	1		1	3	3	6	1
1246	1	3	0	3	2	0	3	3	0	0	2	3	3	1	0	0	0	20	0	1	0	3	3	3	3	6	0
1247	1	3	0	3	2	0	3	3	0	0	2	3	2	1	0	0	0	20	0	1	0	3	3	3	2	5	0
1248	1	4	0	3	1	0		2	0	1	2	3	3	1	0	0	0	20	0	1	0		2	3	3	6	0
1249	1	1	0	3	0	0	3	2	0	1	2	3	3	1	0	0	0	20	0	1	0	3	2	3	3	6	0
1250	1	5	0	3	0	1	3	2	1	1	2	3	3	1	0	0	0	20	0	1	0	3	2	3	3	6	0
1251	1	3	0	2	2	0	3	3	1	0	2	3	4	1	1	0	0	20	0	1	1	3	3	3	3	6	1
1252	0	1	0	1	4	1	2	1	1	1	1	2	2	1	0	1	0	20	0	1	1	2	1	2	2	4	1
1253	0	2	0	4	1	0	3	3	0	0	2	3	3	1	0	0	0	20	0	1	0	3	3	3	3	6	0
1254	0	2	0	3	3	1	3	3	1	1	2	3	3	1	1	0	0	20	0	1	1	3	3	3	3	6	1
1255	1	2	0	1	0	1	2	2	0	1	2	2	2	1	1	0	0	20	0	1	1	2	2	2	2	4	1
1256	0	4	0	2	3	1	2	1	1	1	1	2	2	1	0	1	0	20	0	1	1	2	1	2	2	4	1
1257	1	3	0	3	2	0	3	3	0	0	2	3	3	1	0	0	0	20	0	1	0	3	3	3	3	6	0
1258	0	5	0	2	0	1	2	1	0	0	1	1	2	1	0	0	0	20	0	1	0	2	1	1	2	3	0
1259	0	2	0	3	3	1	2	2	1	1	2	3	3	1	1	0	0	20	0	1	1	2	2	3	3	6	1
1260	1	1	1	2	0	1	1	1	1	1	0	2	1	1	0	1	0	20	0	1	1	1	1	2	1	3	1
1261	1	1	1	2	1	1	2	1	0	1	0	2	1	1	0	0	1	20	0	1	1	2	1	2	1	3	1
1262	0	3	1	2	2	0	1	2	0	1	2	3	2	1	0	1	0	20	0	1	1	1	2	3	2	5	1
1263	1	1	1	1	1	0	1	1	0	1	2	1	1	1	0	1	0	20	0	1	1	1	1	1	1	2	1
1264	0	1	1	2	3	0	3	1	1	1	2	2	1	1	0	0	1	20	0	1	1	3	1	2	1	3	1
1265	0	2	1	2	2	0	2	2	1	1	2	1	1	1	0	0	1	20	0	1	1	2	2	1	1	2	1
1266	1	1	1	1	3	0	1	1	0	0	2	1	1	1	0	0	0	20	0	1	0	1	1	1	1	2	0
1267	0	5	1	1	2	1	1	1	0	1	1	1	1	1	0	0	1	20	0	1	1	1	1	1	1	2	1
1268	1	1	1	2	1	1	1	1	0	1	0	2	1	1	0	0	1	20	0	1	1	1	1	2	1	3	1
1269	0	1	1	2	2	0	1	1	1	1	2	2	1	1	0	0	1	20	0	1	1	1	1	2	1	3	1
1270	0	1	1	3	3	0	1	1	0	0	2	1	1	1	0	0	0	20	0	1	0	1	1	1	1	2	0
1271	1	1	1	2	0	1	1	1	1	0	1	2	1	1	0	1	0	20	0	1	1	1	1	2	1	3	1
1272	0	4	1	1	2	0	1	1	0	1	2	1	1	1	0	0	0	20	0	1	0	1	1	1	1	2	0
1273	1	4	1	2	0	1	1	1	1	1	2	1	1	1	0	1	0	20	0	1	1	1	1	1	1	2	1
1274	0	1	1	1	2	0	1	1	0	1	2	1	1	1	0	0	0	20	0	1	0	1	1	1	1	2	0
1275	0	5	1	1	2	1	1	1	0	1	1	1	1	1	0	0	1	20	0	1	1	1	1	1	1	2	1
1276	1	1	1	2	4	1	3	1	1	1	0	1	1	1	0	0	1	20	0	1	1	3	1	1	1	2	1
1277	1	1	1	1	4	0	2	1	1	1	1	1	1	1	0	0	1	14	0	1	1	2	1	1	1	2	1
1278	0	5	1	1	2	1	1	1	0	1	1	1	1	1	0	0	1	20	0	1	1	1	1	1	1	2	1
1279	0	4	1	3	3	0	1	2	0	1	2	1	1	1	0	0	0	20	0	1	0	1	2	1	1	2	0
1280	0	1	1	2	3	0	1	1	0	0	2	2	1	1	0	0	0	20	0	1	0	1	1	2	1	3	0
1281	0	4	1	1	2	0	1	1	0	1	2	1	1	1	0	0	0	20	0	1	0	1	1	1	1	2	0
1282	1	1	1	2	0	1	1	1	1	1	2	2	1	1	0	1	0	20	0	1	1	1	1	2	1	3	1
1283	1	4	1	2	1	1	1	2	0	1	0	3	2	1	0	0	1	20	0	1	1	1	2	3	2	5	1
1284	0	1	1	1	2	1	1	1	0	1	1	1	1	1	0	1	0	20	0	1	1	1	1	1	1	2	1
1285	1	1	1	1	4	1	1	1	1	1	0	1	1	1	0	0	1	20	0	1	1	1	1	1	1	2	1
1286	0	4	1	1	2	0	1	1	0	1	2	1	1	1	0	0	0	20	0	1	0	1	1	1	1	2	0
1287	0	1	1	1	3	0	1	1	0	0	2	1	1	1	0	0	0	20	0	1	0	1	1	1	1	2	0
1288	0	3	1	2	2	0	1	2	0	1	2	3	2	1	0	1	0	20	0	1	1	1	2	3	2	5	1
1289	1	4	1	2	1	1	1	2	0	1	0	3	2	1	0	0	1	20	0	1	1	1	2	3	2	5	1
1290	0	5	1	1	2	1	1	1	0	1	1	1	1	1	0	0	1	20	0	1	1	1	1	1	1	2	1
1291	1	4	1	2	2	0	1	2	0	1	2	3	2	1	0	0	1	14	0	1	1	1	2	3	2	5	1
1292	1	4	1	1	2	0	1	1	0	1	2	1	1	1	0	0	1	14	0	1	1	1	1	1	1	2	1
1293	0	5	1	1	2	1	1	1	0	1	1	1	1	1	0	0	1	20	0	1	1	1	1	1	1	2	1
1294	0	1	1	1	1	0	2	1	1	1	2	1	1	1	0	0	1	14	0	1	1	2	1	1	1	2	1
1295	1	3	1	2	0	1	1	2	1	0	2	3	2	1	0	1	0	20	0	1	1	1	2	3	2	5	1
1296	0	4	1	2	0	1	2	2	1	1	2	1	1	1	0	1	0	20	0	1	1	2	2	1	1	2	1
1297	0	2	1	2	2	0	2	3	1	1	2	1	1	1	0	0	1	20	0	1	1	2	3	1	1	2	1
1298	0	5	1	1	4	0	1	1	0	0	2	1	1	1	0	0	0	20	0	1	0	1	1	1	1	2	0
1299	1	1	1	1	1	0	1	1	0	1	2	1	1	1	0	1	0	20	0	1	1	1	1	1	1	2	1
1300	0	1	1	2	3	0	1	1	1	1	2	2	1	1	0	0	1	20	0	1	1	1	1	2	1	3	1
1301	0	5	1	1	2	1	1	1	0	1	1	1	1	1	0	0	1	20	0	1	1	1	1	1	1	2	1
1302	0	4	1	1	0	0	1	1	0	1	2	1	2	1	0	0	1	20	0	1	1	1	1	1	2	3	1
1303	0	5	1	1	2	1	1	1	0	1	1	1	1	1	0	0	1	20	0	1	1	1	1	1	1	2	1
1304	0	4	1	1	2	0	1	1	0	1	2	1	1	1	0	0	0	20	0	1	0	1	1	1	1	2	0
1305	1	3	1	1	0	1	2	3	1	0	2	1	1	1	0	1	0	20	0	1	1	2	3	1	1	2	1
1306	1	1	1	1	1	0	1	1	0	1	2	1	1	1	0	1	0	20	0	1	1	1	1	1	1	2	1
1307	1	4	1	2	0	1	1	1	1	1	2	1	1	1	0	1	0	20	0	1	1	1	1	1	1	2	1
1308	0	2	1	2	2	0	3	3	1	1	2	1	1	1	0	0	1	20	0	1	1	3	3	1	1	2	1
1309	0	5	1	1	2	1	1	1	0	1	1	1	1	1	0	0	1	20	0	1	1	1	1	1	1	2	1
1310	0	1	1	1	2	0	1	1	0	1	2	1	1	1	0	1	0	20	0	1	1	1	1	1	1	2	1
1311	1	4	1	2	0	1	1	1	1	1	2	1	1	1	0	1	0	20	0	1	1	1	1	1	1	2	1
1312	0	1	1	2	2	1	1	1	0	1	1	2	1	1	0	1	0	20	0	1	1	1	1	2	1	3	1
1313	0	3	1	1	0	0	2	3	0	1	2	2	2	1	0	1	0	20	0	1	1	2	3	2	2	4	1
1314	1	1	1	1	4	1	1	2	1	1	0	1	2	1	0	0	1	20	0	1	1	1	2	1	2	3	1
1315	0	3	1	2	2	0	1	2	0	1	2	3	2	1	0	1	0	20	0	1	1	1	2	3	2	5	1
1316	0	4	1	1	2	0	1	1	0	1	2	1	1	1	0	0	0	20	0	1	0	1	1	1	1	2	0
1317	1	4	1	2	2	0	1	2	1	1	2	3	2	1	0	0	1	12	0	1	1	1	2	3	2	5	1
1318	0	5	1	1	2	1	1	1	1	1	1	1	2	1	0	0	1	16	0	1	1	1	1	1	2	3	1
1319	1	3	1	1	0	1	2	3	1	0	2	1	1	1	0	1	0	20	0	1	1	2	3	1	1	2	1
1320	1	3	1	2	4	1	1	2	1	1	0	3	2	1	0	0	1	20	0	1	1	1	2	3	2	5	1
1321	1	1	1	1	0	1	1	1	1	1	2	1	1	1	0	1	0	20	0	1	1	1	1	1	1	2	1
1322	0	1	1	1	3	1	1	1	0	1	0	1	1	1	0	0	1	20	0	1	1	1	1	1	1	2	1
1323	1	4	1	2	0	1	1	1	1	1	2	1	1	1	0	1	0	20	0	1	1	1	1	1	1	2	1
1324	0	1	1	1	0	1	1	1	0	1	2	1	1	1	0	1	0	20	0	1	1	1	1	1	1	2	1
1325	0	3	1	2	2	0	1	2	0	1	2	3	2	1	0	1	0	20	0	1	1	1	2	3	2	5	1
1326	0	1	1	1	4	1	1	1	1	1	0	1	1	1	0	0	1	20	0	1	1	1	1	1	1	2	1
1327	0	5	1	1	2	1	1	1	1	1	1	1	2	1	0	0	1	16	0	1	1	1	1	1	2	3	1
1328	0	1	1	1	2	0	1	1	0	1	2	1	1	1	0	0	0	20	0	1	0	1	1	1	1	2	0
1329	0	5	1	1	2	1	1	1	1	1	1	1	2	1	0	0	1	16	0	1	1	1	1	1	2	3	1
1330	1	1	1	2	0	1	1	1	1	1	2	2	1	1	0	1	0	20	0	1	1	1	1	2	1	3	1
1331	1	4	1	2	3	0	1	1	0	1	2	1	1	1	0	0	0	20	0	1	0	1	1	1	1	2	0
1332	1	1	1	1	4	1	1	1	1	1	0	1	1	1	0	0	1	20	0	1	1	1	1	1	1	2	1
1333	0	1	1	1	4	1	1	1	1	1	0	1	1	1	0	0	1	20	0	1	1	1	1	1	1	2	1
1334	0	3	1	2	2	0	1	2	0	1	2	3	2	1	0	1	0	20	0	1	1	1	2	3	2	5	1
1335	1	1	1	2	0	1	1	1	1	1	2	2	1	1	0	1	0	20	0	1	1	1	1	2	1	3	1
1336	1	2	1	1	0	1	2	1	1	0	2	2	2	1	0	1	0	20	0	1	1	2	1	2	2	4	1
1337	0	1	1	2	2	0	1	1	0	1	2	2	1	1	0	0	0	20	0	1	0	1	1	2	1	3	0
1338	1	4	1	2	2	0	1	2	0	1	2	3	2	1	0	0	1	14	0	1	1	1	2	3	2	5	1
1339	1	1	1	2	3	0	1	1	0	0	2	2	1	1	0	0	0	20	0	1	0	1	1	2	1	3	0
1340	1	1	1	2	3	0	1	1	0	1	2	2	1	1	0	0	0	20	0	1	0	1	1	2	1	3	0
1341	0	5	1	1	4	0	1	1	0	0	2	1	1	1	0	0	0	20	0	1	0	1	1	1	1	2	0
1342	0	1	1	1	2	0	1	1	0	1	2	1	1	1	0	0	0	20	0	1	0	1	1	1	1	2	0
1343	0	4	1	1	2	0	1	1	0	1	2	1	1	1	0	0	0	20	0	1	0	1	1	1	1	2	0
1344	0	5	1	1	3	0	1	1	0	0	2	1	1	1	0	0	0	20	0	1	0	1	1	1	1	2	0
1345	0	5	1	1	2	1	1	1	1	1	1	1	2	1	0	0	1	16	0	1	1	1	1	1	2	3	1
1346	0	1	1	2	2	1	1	1	0	1	1	2	1	1	0	1	0	20	0	1	1	1	1	2	1	3	1
1347	1	1	1	3	2	0	3	1	0	1	2	1	1	1	0	0	0	20	0	1	0	3	1	1	1	2	0
1348	0	1	1	2	3	0	1	1	0	0	2	2	1	1	0	0	0	20	0	1	0	1	1	2	1	3	0
1349	0	5	1	1	4	0	1	1	0	0	2	1	1	1	0	0	0	20	0	1	0	1	1	1	1	2	0
1350	1	5	1	2	4	1	2	1	1	1	1	1	1	1	0	0	1	20	0	1	1	2	1	1	1	2	1
1351	1	1	1	2	0	1	1	1	0	0	1	2	1	1	0	1	0	20	0	1	1	1	1	2	1	3	1
1352	0	5	1	1	2	1	1	1	0	1	1	1	1	1	0	0	1	20	0	1	1	1	1	1	1	2	1
1353	0	5	1	1	4	0	1	1	0	0	2	1	1	1	0	0	0	20	0	1	0	1	1	1	1	2	0
1354	0	1	1	2	3	0	1	1	1	1	2	2	1	1	0	0	1	20	0	1	1	1	1	2	1	3	1
1355	0	1	1	2	3	0	1	1	0	0	2	2	1	1	0	0	0	20	0	1	0	1	1	2	1	3	0
1356	0	3	1	1	0	0	2	2	0	0	2	2	2	1	0	1	0	20	0	1	1	2	2	2	2	4	1
1357	0	4	1	1	2	0	1	1	0	1	2	1	1	1	0	0	0	20	0	1	0	1	1	1	1	2	0
1358	0	4	1	1	2	0	1	1	0	1	2	1	1	1	0	0	0	20	0	1	0	1	1	1	1	2	0
1359	0	1	1	2	3	0	2	1	1	1	2	2	1	1	0	0	1	20	0	1	1	2	1	2	1	3	1
1360	0	3	1	1	0	0	2	2	0	0	2	2	2	1	0	1	0	20	0	1	1	2	2	2	2	4	1
1361	0	4	1	1	2	0	1	1	0	1	2	1	1	1	0	0	0	20	0	1	0	1	1	1	1	2	0
1362	0	4	1	1	2	0	1	1	0	1	2	1	1	1	0	0	0	20	0	1	0	1	1	1	1	2	0
1363	0	2	1	2	2	0	2	2	1	1	2	1	1	1	0	0	1	20	0	1	1	2	2	1	1	2	1
1364	1	2	1	2	4	1	1	2	1	1	0	1	1	1	0	0	1	20	0	1	1	1	2	1	1	2	1
1365	0	1	1	2	2	0	1	1	1	1	2	2	1	1	0	0	1	20	0	1	1	1	1	2	1	3	1
1366	0	5	1	1	4	0	1	1	0	1	2	1	1	1	0	0	0	20	0	1	0	1	1	1	1	2	0
1367	0	5	1	1	4	0	1	1	0	0	2	1	1	1	0	0	0	20	0	1	0	1	1	1	1	2	0
1368	0	4	1	1	2	0	1	1	0	1	2	1	1	1	0	0	0	20	0	1	0	1	1	1	1	2	0
1369	0	4	1	1	2	0	1	2	0	1	2	3	2	1	0	0	0	20	0	1	0	1	2	3	2	5	0
1370	1	1	1	2	0	1	1	1	1	1	2	2	1	1	0	1	0	20	0	1	1	1	1	2	1	3	1
1371	0	3	1	3	3	0	1	2	0	1	2	3	2	1	0	0	0	20	0	1	0	1	2	3	2	5	0
1372	1	3	1	1	0	1	2	3	1	0	2	2	2	1	0	1	0	20	0	1	1	2	3	2	2	4	1
1373	0	5	1	1	4	0	1	1	0	0	2	1	1	1	0	0	0	20	0	1	0	1	1	1	1	2	0
1374	1	4	1	3	2	0	1	2	0	1	2	1	1	1	0	0	0	20	0	1	0	1	2	1	1	2	0
1375	0	2	1	2	2	0	1	2	1	1	2	1	1	1	0	0	1	20	0	1	1	1	2	1	1	2	1
1376	1	3	1	2	2	0	1	2	0	0	2	2	2	1	0	0	0	20	0	1	0	1	2	2	2	4	0
1377	0	5	1	1	2	1	1	1	0	1	1	1	1	1	0	0	1	20	0	1	1	1	1	1	1	2	1
1378	1	1	1	2	0	1	1	1	1	1	2	2	1	1	0	1	0	20	0	1	1	1	1	2	1	3	1
1379	0	3	1	1	0	0	2	2	0	0	2	2	2	1	0	1	0	20	0	1	1	2	2	2	2	4	1
1380	1	1	0	1	3	0	2	2	1	1	1	2	2	2	1	0	0	20	0	1	1	2	2	2	2	4	1
1381	0	1	0	1	3	0	2	2	1	0	2	2	2	2	0	0	0	20	0	1	0	2	2	2	2	4	0
1382	0	5	0	1	3	1	2	3	0	1	1	3	3	2	0	0	1	20	0	1	1	2	3	3	3	6	1
1383	1	3	0	4	3	0	3	3	0	0	2	3	3	2	1	0	0	20	0	1	1	3	3	3	3	6	1
1384	0	1	0	1	1	0	2	2	1	0	2	2	2	2	0	0	0	20	0	1	0	2	2	2	2	4	0
1385	0	4	0	2	0	0	3	2	0	0	2	3	2	2	0	0	0	20	0	1	0	3	2	3	2	5	0
1386	1	2	0	3	2	0	2	3	1	1	2	3	1	2	1	0	0	20	0	1	1	2	3	3	1	4	1
1387	0	5	0	2	3	0	2	2	1	1	1	2	2	2	1	0	0	20	0	1	1	2	2	2	2	4	1
1388	0	5	0	4	3	0	2	2	1	1	1	2	2	2	1	0	0	20	0	1	1	2	2	2	2	4	1
1389	0	4	0	1	0	0	3	2	1	0	2	3	2	2	1	0	0	20	0	1	1	3	2	3	2	5	1
1390	0	4	0	2	3	1	2	1	1	1	1	2	2	2	0	1	0	20	0	1	1	2	1	2	2	4	1
1391	0	3	0	2	4	1	1	1	1	1	0	1	1	2	0	1	0	20	0	1	1	1	1	1	1	2	1
1392	0	3	0	2	4	1	1	1	1	1	0	1	1	2	0	1	0	20	0	1	1	1	1	1	1	2	1
1393	0	5	0	2	3	0	2	1	0	0	2	2	2	2	0	0	0	20	0	1	0	2	1	2	2	4	0
1394	0	3	0	3	0	1	3	3	1	1	1	3	3	2	0	0	0	20	1	1	0	3	3	3	3	6	1
1395	0	3	0	1	0	0	3	2	1	0	2	3	2	2	1	0	0	20	0	1	1	3	2	3	2	5	1
1396	0	1	0	1	3	0	2	2	0	1	1	2	2	2	1	0	0	20	0	1	1	2	2	2	2	4	1
1397	0	1	0	3	0	1	2	2	0	1	2	2	3	2	0	0	0	20	1	1	0	2	2	2	3	5	1
1398	0	5	0	4	3	0	2	2	1	1	1	2	2	2	1	0	0	20	0	1	1	2	2	2	2	4	1
1399	1	1	0	2	1	0	2	2	0	0	2	2	2	2	0	0	0	20	0	1	0	2	2	2	2	4	0
1400	0	4	1	2	0	1	2	1	1	1	2	1	1	2	0	1	0	20	0	1	1	2	1	1	1	2	1
1401	1	3	1	1	1	0	1	2	0	1	2	1	2	2	0	1	0	20	0	1	1	1	2	1	2	3	1
1402	1	3	1	1	1	0	1	2	0	1	2	1	2	2	0	1	0	20	0	1	1	1	2	1	2	3	1
1403	1	3	1	1	1	0	1	2	0	1	2	1	2	2	0	1	0	20	0	1	1	1	2	1	2	3	1
1404	0	3	1	1	2	0	1	1	0	0	2	1	1	2	0	0	0	20	0	1	0	1	1	1	1	2	0
1405	0	3	1	1	0	1	1	2	0	1	1	3	2	2	0	0	1	20	0	1	1	1	2	3	2	5	1
1406	0	2	1	1	2	0	2	1	0	0	2	2	2	2	0	0	0	20	0	1	0	2	1	2	2	4	0
1407	0	5	1	1	4	0	1	1	1	1	1	1	1	2	0	0	1	20	0	1	1	1	1	1	1	2	1
1408	0	2	1	1	3	0	1	2	0	0	2	1	2	2	0	1	0	20	0	1	1	1	2	1	2	3	1
1409	1	5	1	2	4	1	2	1	1	1	1	1	1	2	0	0	1	20	0	1	1	2	1	1	1	2	1
1410	0	3	1	1	2	0	1	1	0	0	2	1	1	2	0	0	0	20	0	1	0	1	1	1	1	2	0
1411	1	3	1	1	1	0	1	2	0	1	2	3	2	2	0	1	0	20	0	1	1	1	2	3	2	5	1
1412	0	4	1	1	2	0	1	1	1	1	2	1	1	2	0	0	1	12	0	1	1	1	1	1	1	2	1
1413	1	1	1	2	4	1	2	1	1	1	0	1	1	2	0	0	1	20	0	1	1	2	1	1	1	2	1
1414	1	1	1	1	4	1	1	2	1	1	0	1	2	2	0	0	1	20	0	1	1	1	2	1	2	3	1
1415	1	1	1	2	2	0	3	1	1	1	2	1	1	2	0	0	1	20	0	1	1	3	1	1	1	2	1
1416	0	3	1	1	0	1	1	2	0	1	2	1	2	2	0	1	0	20	0	1	1	1	2	1	2	3	1
1417	1	3	1	1	1	0	1	2	0	1	2	1	2	2	0	1	0	20	0	1	1	1	2	1	2	3	1
1418	0	4	1	2	2	0	1	1	0	1	2	1	1	2	0	0	0	20	0	1	0	1	1	1	1	2	0
1419	0	4	1	1	0	1	1	1	0	1	0	1	1	2	0	0	1	20	0	1	1	1	1	1	1	2	1
1420	1	2	1	2	3	0	1	1	0	0	2	2	2	3	0	1	0	20	0	1	1	1	1	2	2	4	1
1421	1	2	1	2	0	1	2	1	1	1	0	2	2	3	0	1	0	20	0	1	1	2	1	2	2	4	1
1422	0	4	1	1	0	0	1	1	0	1	2	1	2	3	0	0	1	18	0	1	1	1	1	1	2	3	1
1423	1	2	1	2	3	0	1	1	0	0	2	1	2	3	0	1	0	20	0	1	1	1	1	1	2	3	1
1424	0	1	1	3	3	0	1	1	0	0	2	1	1	3	0	0	0	20	0	1	0	1	1	1	1	2	0
1425	1	2	1	2	3	0	1	1	0	0	2	1	2	3	0	1	0	20	0	1	1	1	1	1	2	3	1
1426	1	5	1	2	4	0	2	2	1	1	1	1	1	3	0	0	1	20	0	1	1	2	2	1	1	2	1
1427	0	5	1	1	4	0	1	2	1	1	1	1	2	3	0	0	1	20	0	1	1	1	2	1	2	3	1
1428	1	2	1	2	3	0	1	1	0	0	2	2	2	3	0	1	0	20	0	1	1	1	1	2	2	4	1
1429	1	1	1	2	2	0	3	1	1	1	2	1	1	3	0	0	1	12	0	1	1	3	1	1	1	2	1
1430	1	1	1	3	2	0	1	1	0	0	2	1	1	3	0	0	0	20	0	1	0	1	1	1	1	2	0
1431	1	4	1	1	0	1	1	1	1	1	2	1	1	3	0	1	0	20	0	1	1	1	1	1	1	2	1
1432	1	2	1	2	3	0	1	1	0	0	2	1	2	3	0	1	0	20	0	1	1	1	1	1	2	3	1
1433	1	2	1	2	3	0	1	1	0	0	2	1	2	3	0	1	0	20	0	1	1	1	1	1	2	3	1
1434	1	1	1	2	2	0	3	1	1	1	2	1	1	3	0	0	1	20	4	1	1	3	1	1	1	2	5
1435	0	1	1	1	3	0	1	1	1	1	2	1	1	3	0	0	1	20	4	1	1	1	1	1	1	2	5
1436	1	2	1	2	0	1	2	1	1	1	2	2	2	3	0	1	0	20	0	1	1	2	1	2	2	4	1
1437	1	5	1	2	4	0	2	2	1	1	1	1	1	3	0	0	1	20	0	1	1	2	2	1	1	2	1
1438	0	3	1	1	0	0	2	2	0	0	2	1	2	3	0	1	0	20	0	1	1	2	2	1	2	3	1
1439	0	1	1	2	3	0	2	1	1	1	2	2	1	3	0	0	1	20	0	1	1	2	1	2	1	3	1
1440	1	1	1	1	4	1	1	1	1	1	0	1	1	3	0	1	0	20	0	1	1	1	1	1	1	2	1
1441	0	1	1	2	3	0	1	1	1	1	2	2	1	3	0	0	1	20	0	1	1	1	1	2	1	3	1
1442	1	2	1	3	3	0	1	1	0	0	2	1	2	3	0	1	0	20	0	1	1	1	1	1	2	3	1
1443	1	1	1	3	2	0	3	1	0	1	2	1	1	3	0	0	0	20	0	1	0	3	1	1	1	2	0
1444	1	2	1	2	3	0	2	1	0	0	2	2	2	3	0	1	0	20	0	1	1	2	1	2	2	4	1
1445	0	4	1	1	0	0	1	1	0	1	2	1	1	3	0	1	0	20	0	1	1	1	1	1	1	2	1
1446	0	3	1	1	0	0	2	2	0	0	2	1	1	3	0	1	0	20	0	1	1	2	2	1	1	2	1
1447	0	3	1	1	0	0	2	2	0	0	2	1	1	3	0	1	0	20	0	1	1	2	2	1	1	2	1
1448	1	2	1	2	3	0	2	1	0	0	2	2	2	3	0	1	0	20	0	1	1	2	1	2	2	4	1
1449	1	2	1	2	0	0	2	1	0	1	2	2	2	3	0	1	0	20	0	1	1	2	1	2	2	4	1
1450	0	3	1	1	0	0	2	2	0	0	2	1	1	3	0	1	0	20	0	1	1	2	2	1	1	2	1
1451	0	4	1	1	0	1	1	1	0	1	0	1	1	3	0	0	1	20	0	1	1	1	1	1	1	2	1
1452	0	2	1	2	2	0	2	2	1	1	2	3	3	3	0	0	1	20	0	1	1	2	2	3	3	6	1
1453	1	2	1	2	0	1	2	1	1	1	2	2	2	3	0	1	0	20	0	1	1	2	1	2	2	4	1
1454	1	3	1	2	2	0	1	2	0	0	2	1	2	3	0	0	0	20	0	1	0	1	2	1	2	3	0
1455	0	4	1	2	0	1	2	2	1	1	2	1	1	3	0	1	0	20	0	1	1	2	2	1	1	2	1
1456	1	2	1	2	3	0	1	1	0	0	2	2	2	3	0	1	0	20	0	1	1	1	1	2	2	4	1
1457	1	2	1	2	3	0	1	1	0	0	2	1	2	3	0	1	0	20	0	1	1	1	1	1	2	3	1
1458	0	3	1	1	0	0	2	2	0	0	2	1	2	3	0	1	0	20	0	1	1	2	2	1	2	3	1
1459	1	2	1	2	3	0	1	1	0	0	2	2	2	3	0	1	0	20	0	1	1	1	1	2	2	4	1
1460	1	5	1	2	4	1	2	1	1	1	1	1	1	4	0	0	1	20	0	1	1	2	1	1	1	2	1
1461	0	4	1	3	3	1	2	2	0	1	1	1	1	4	0	1	0	20	0	1	1	2	2	1	1	2	1
1462	0	4	1	1	0	0	1	1	0	1	2	1	2	4	0	0	1	20	0	1	1	1	1	1	2	3	1
1463	0	5	1	1	4	0	1	2	1	1	1	1	2	4	0	0	1	20	0	1	1	1	2	1	2	3	1
1464	0	1	1	1	0	0	1	1	0	0	2	1	2	4	0	1	0	20	0	1	1	1	1	1	2	3	1
1465	1	4	1	1	2	0	1	1	0	1	2	1	1	4	0	0	1	14	0	1	1	1	1	1	1	2	1
1466	1	4	1	1	2	0	1	1	0	1	2	1	1	4	0	0	1	14	0	1	1	1	1	1	1	2	1
1467	1	4	1	1	2	0	1	1	0	1	2	1	1	4	0	0	1	14	0	1	1	1	1	1	1	2	1
1468	0	4	1	1	0	1	1	1	0	1	0	1	1	4	0	0	1	20	0	1	1	1	1	1	1	2	1
1469	1	2	1	1	1	0	2	1	0	1	2	2	2	4	0	1	0	20	0	1	1	2	1	2	2	4	1
1470	1	2	1	2	3	0	2	1	0	0	2	2	2	4	0	0	0	20	0	1	0	2	1	2	2	4	0
1471	1	4	1	1	2	0	1	1	0	1	2	1	1	4	0	0	1	14	0	1	1	1	1	1	1	2	1
1472	1	2	1	1	1	0	2	1	0	1	2	2	2	4	0	1	0	20	0	1	1	2	1	2	2	4	1
1473	1	2	1	1	1	0	2	1	0	1	2	2	2	4	0	1	0	20	0	1	1	2	1	2	2	4	1
1474	0	5	1	1	4	0	1	1	1	1	1	1	1	4	0	0	1	20	0	1	1	1	1	1	1	2	1
1475	1	4	1	1	2	0	1	1	0	1	2	1	1	4	0	0	1	14	0	1	1	1	1	1	1	2	1
1476	1	4	1	1	2	0	1	1	0	1	2	1	1	4	0	0	1	14	0	1	1	1	1	1	1	2	1
1477	1	4	1	1	2	0	1	1	0	1	2	1	1	4	0	0	1	14	0	1	1	1	1	1	1	2	1
1478	0	4	1	1	0	0	1	1	0	1	2	1	1	4	0	1	0	20	0	1	1	1	1	1	1	2	1
1479	1	1	1	2	4	1	3	1	1	1	0	1	1	5	0	0	1	20	0	1	1	3	1	1	1	2	1
1480	1	2	0	2	0	1	3	2	0	0	2	2	2	1	1	0	0	20	0	0	1	3	2	2	2	4	1
1481	0	1	0	1	3	0	2	2	1	1	2	2	2	1	1	0	0	20	0	0	1	2	2	2	2	4	1
1482	0	3	0	2	2	0	2	2	0	0	2	2	2	1	0	0	0	20	0	0	0	2	2	2	2	4	0
1483	1	1	0	1	3	0	2	2	0	1	1	2	2	1	1	0	0	20	0	0	1	2	2	2	2	4	1
1484	1	2	0	3	0	0	3	2	0	0	2	3	3	1	0	0	0	20	0	0	0	3	2	3	3	6	0
1485	1	4	0	1	1	1		2	1	1	1	3	3	1	0	0	1	20	0	0	1		2	3	3	6	1
1486	1	2	0	2	1	1	1	2	1	1	1	2	2	1	0	0	1	20	0	0	1	1	2	2	2	4	1
1487	1	1	0	3	0	0	3	3	0	0	2	3	3	1	0	0	0	20	0	0	0	3	3	3	3	6	0
1488	1	1	0	4	2	0	3	2	0	0	2	3	2	1	0	0	0	20	0	0	0	3	2	3	2	5	0
1489	0	4	0	2	3	0	3	1	1	1	1	3	2	1	0	0	1	20	0	0	1	3	1	3	2	5	1
1490	0	4	0	1	0	1	2	1	0	1	1	2	2	1	0	0	0	20	0	0	0	2	1	2	2	4	0
1491	0	1	0	2	1	1	2	2	0	1	0	2	2	1	1	0	0	20	0	0	1	2	2	2	2	4	1
1492	0	5	0	2	1	0	3	2	1	0	2	3	3	1	0	0	0	20	0	0	0	3	2	3	3	6	0
1493	0	3	0	3	0	0	4	2	1	1	2	4	2	1	1	0	0	20	0	0	1	3	2	3	2	5	1
1494	1	3	0	4	0	0	3	3	0	0	2	3	3	1	0	0	0	20	0	0	0	3	3	3	3	6	0
1495	0	1	0	4	4	0	4	4	0	0	2	3	3	1	1	0	0	20	0	0	1	3	3	3	3	6	1
1496	1	1	0	3	0	0	3	3	0	0	2	3	3	1	0	0	0	20	0	0	0	3	3	3	3	6	0
1497	1	1	0	3	2	0	3	2	0	0	2	3	3	1	0	0	0	20	0	0	0	3	2	3	3	6	0
1498	1	3	0	3	4	0	3	3	0	0	2	3	2	1	0	0	0	20	0	0	0	3	3	3	2	5	0
1499	0	2	0	3	0	1	2	1	0	1	2	2	2	1	0	0	0	20	1	0	0	2	1	2	2	4	1
1500	1	5	0	3	1	0	3	3	1	1	2	3	2	1	0	0	0	20	0	0	0	3	3	3	2	5	0
1501	1	3	0	3	2	0	3	3	0	0	2	3	3	1	0	0	0	20	0	0	0	3	3	3	3	6	0
1502	1	4	0	2	2	0	1	2	0	0	2	2	2	1	0	0	0	20	0	0	0	1	2	2	2	4	0
1503	1	2	0	3	3	0	3	2	0	1	2	2	2	1	0	0	0	20	0	0	0	3	2	2	2	4	0
1504	1	2	0	3	0	0	3	2	1	0	2	3	3	1	0	0	0	20	0	0	0	3	2	3	3	6	0
1505	0	4	0	2	0	0		1	0	1	2	3	3	1	0	0	1	20	0	0	1		1	3	3	6	1
1506	0	5	0	1	4	0	3	3	0	0	2	3	3	1	0	0	0	20	0	0	0	3	3	3	3	6	0
1507	1	1	0	4	0	0	3	4	0	0	2	3	3	1	0	0	0	20	0	0	0	3	3	3	3	6	0
1508	0	1	0	4	3	0	3	2	0	0	2	2	2	1	0	0	0	20	0	0	0	3	2	2	2	4	0
1509	0	5	0	2	0	1	3	2	1	1	1	2	2	1	1	0	0	20	0	0	1	3	2	2	2	4	1
1510	1	3	0	2	2	0		2	0	0	2	3	3	1	0	0	0	20	0	0	0		2	3	3	6	0
1511	1	2	0	4	0	0	3	3	0	0	2	3	3	1	0	0	0	20	0	0	0	3	3	3	3	6	0
1512	1	3	0	1	4	0	1	2	1	1	1	1	2	1	0	1	0	20	0	0	1	1	2	1	2	3	1
1513	1	2	0	2	0	1	3	2	0	0	2	2	2	1	1	0	0	20	0	0	1	3	2	2	2	4	1
1514	1	1	0	2	2	0	2	2	0	0	2	2	2	1	0	0	0	20	0	0	0	2	2	2	2	4	0
1515	1	4	0	3	2	0	3	2	0	0	2	3	2	1	0	0	0	20	0	0	0	3	2	3	2	5	0
1516	0	3	0	2	3	1	3	3	1	1	2	3	3	1	1	0	0	20	0	0	1	3	3	3	3	6	1
1517	1	2	0	4	0	0	3	3	0	0	2	3	3	1	0	0	0	20	0	0	0	3	3	3	3	6	0
1518	0	1	0	3	3	0	3	3	1	0	2	3	3	1	1	0	0	20	0	0	1	3	3	3	3	6	1
1519	1	1	0	2	2	0	2	2	0	0	2	2	2	1	0	0	0	20	0	0	0	2	2	2	2	4	0
1520	0	5	0	1	0	1	2	1	0	0	2	2	2	1	0	0	0	20	0	0	0	2	1	2	2	4	0
1521	0	2	0	3	3	1	2	3	1	1	2	3	3	1	1	0	0	20	0	0	1	2	3	3	3	6	1
1522	0	1	0	1	3	0	2	2	1	1	2	2	2	1	1	0	0	20	0	0	1	2	2	2	2	4	1
1523	1	2	0	3	0	0	3	2	0	0	2	2	2	1	0	0	0	20	0	0	0	3	2	2	2	4	0
1524	0	3	0	2	3	1	2	2	1	1	1	2	2	1	0	0	1	20	0	0	1	2	2	2	2	4	1
1525	0	1	0	3	4	0	3	3	0	1	2	3	3	1	0	0	0	20	0	0	0	3	3	3	3	6	0
1526	1	4	0	1	2	0	2	1	0	0	2	2	2	1	0	0	0	20	0	0	0	2	1	2	2	4	0
1527	0	5	0	2	4	0	3	2	0	0	2	2	2	1	0	0	0	20	0	0	0	3	2	2	2	4	0
1528	0	1	0	2	0	1	2	2	1	1	1	2	2	1	0	0	1	20	0	0	1	2	2	2	2	4	1
1529	1	5	0	4	1	0	3	3	1	1	2	3	3	1	0	0	0	20	0	0	0	3	3	3	3	6	0
1530	0	3	0	3	4	1	3	3	1	1	0	3	2	1	0	1	0	20	0	0	1	3	3	3	2	5	1
1531	0	2	0	3	3	0	3	2	1	0	2	3	3	1	1	0	0	20	0	0	1	3	2	3	3	6	1
1532	1	4	0	1	1	1		2	1	1	1	3	3	1	0	0	1	20	0	0	1		2	3	3	6	1
1533	0	2	0	3	1	0	3	2	0	1	2	2	2	1	0	0	0	20	0	0	0	3	2	2	2	4	0
1534	1	4	0	2	0	0	2	1	0	1	2	2	1	1	0	0	0	20	0	0	0	2	1	2	1	3	0
1535	0	5	0	2	0	1	2	1	1	0	1	1	2	1	0	0	0	20	0	0	0	2	1	1	2	3	0
1536	1	5	0	3	1	0	3	3	1	1	2	3	3	1	0	0	0	20	0	0	0	3	3	3	3	6	0
1537	1	1	0	3	2	0	3	2	0	0	2	3	3	1	0	0	0	20	0	0	0	3	2	3	3	6	0
1538	1	2	0	3	0	0	3	3	0	0	2	3	3	1	0	0	0	20	0	0	0	3	3	3	3	6	0
1539	1	2	0	4	2	0	3	3	0	0	2	3	3	1	0	0	0	20	0	0	0	3	3	3	3	6	0
1540	1	3	0	2	3	0	2	2	0	0	2	2	2	1	0	0	0	20	0	0	0	2	2	2	2	4	0
1541	0	4	0	1	0	1	2	1	0	1	1	2	2	1	0	0	0	20	0	0	0	2	1	2	2	4	0
1542	0	3	0	4	0	1	3	3	0	1	2	3	3	1	1	0	0	20	0	0	1	3	3	3	3	6	1
1543	0	4	0	2	3	1		1	1	1	1	3	3	1	0	0	1	20	0	0	1		1	3	3	6	1
1544	0	1	0	4	0	0	3	2	0	0	2	2	2	1	0	0	0	20	0	0	0	3	2	2	2	4	0
1545	1	3	0	2	3	0		2	0	1	2	3	3	1	0	0	0	20	0	0	0		2	3	3	6	0
1546	1	1	0	3	0	0	3	2	0	1	2	3	3	1	0	0	0	20	0	0	0	3	2	3	3	6	0
1547	0	5	0	1	1	0	3	3	1	0	2	3	3	1	0	0	0	20	0	0	0	3	3	3	3	6	0
1548	1	5	0	3	1	0	3	2	1	1	2	3	3	1	0	0	0	20	0	0	0	3	2	3	3	6	0
1549	0	5	0	2	0	1	3	2	0	0	1	2	2	1	0	0	0	20	0	0	0	3	2	2	2	4	0
1550	1	2	0	3	0	0	3	2	0	0	2	2	2	1	0	0	0	20	0	0	0	3	2	2	2	4	0
1551	0	2	0	2	0	1	3	2	1	1	1	3	3	1	0	0	1	20	0	0	1	3	2	3	3	6	1
1552	0	1	0	2	3	1	2	2	1	1	2	3	3	1	1	0	0	20	0	0	1	2	2	3	3	6	1
1553	1	1	0	2	4	1	2	2	1	1	1	2	1	1	0	1	0	20	0	0	1	2	2	2	1	3	1
1554	0	4	0	3	1	0	3	1	0	0	2	3	2	1	0	0	0	20	0	0	0	3	1	3	2	5	0
1555	0	2	0	2	1	1	3	3	0	1	1	3	2	1	0	0	1	20	0	0	1	3	3	3	2	5	1
1556	0	5	0	2	4	0	3	2	0	0	2	2	2	1	0	0	0	20	0	0	0	3	2	2	2	4	0
1557	0	5	0	1	1	0	3	3	1	0	2	3	3	1	0	0	0	20	0	0	0	3	3	3	3	6	0
1558	1	1	0	3	0	0	3	2	0	0	2	2	2	1	0	0	0	20	0	0	0	3	2	2	2	4	0
1559	0	4	0	2	3	1	2	1	1	1	1	2	2	1	0	1	0	20	0	0	1	2	1	2	2	4	1
1560	1	5	0	3	0	1	3	2	1	1	2	3	3	1	0	0	0	20	0	0	0	3	2	3	3	6	0
1561	0	2	0	1	3	0	2	2	1	0	2	2	2	1	0	0	0	20	0	0	0	2	2	2	2	4	0
1562	0	1	0	3	3	0	3	3	1	0	2	3	3	1	1	0	0	20	0	0	1	3	3	3	3	6	1
1563	0	4	0	1	3	0		2	1	0	1	3	3	1	1	0	0	20	0	0	1		2	3	3	6	1
1564	0	4	0	3	3	1		1	1	1	2	3	3	1	1	0	0	20	0	0	1		1	3	3	6	1
1565	0	2	0	1	3	1	3	2	0	1	1	3	2	1	0	0	1	20	0	0	1	3	2	3	2	5	1
1566	0	4	0	2	3	1		1	1	1	1	3	3	1	0	0	1	20	0	0	1		1	3	3	6	1
1567	0	4	0	2	0	1		1	1	1	1	3	3	1	0	0	1	20	0	0	1		1	3	3	6	1
1568	1	1	0	4	2	0	3	2	0	1	2	2	2	1	0	0	0	20	0	0	0	3	2	2	2	4	0
1569	0	5	0	2	0	1	3	2	1	0	1	2	2	1	0	0	0	20	0	0	0	3	2	2	2	4	0
1570	1	1	0	3	2	0	3	2	1	1	2	3	3	1	0	0	0	20	0	0	0	3	2	3	3	6	0
1571	1	5	0	3	1	0	3	3	1	1	2	3	2	1	0	0	0	20	0	0	0	3	3	3	2	5	0
1572	1	3	0	1	1	1	1	2	1	1	1	1	2	1	0	0	1	20	0	0	1	1	2	1	2	3	1
1573	0	2	0	3	1	0	3	2	0	1	2	2	2	1	0	0	0	20	0	0	0	3	2	2	2	4	0
1574	1	3	0	2	1	1	2	2	0	1	1	2	2	1	0	0	1	20	0	0	1	2	2	2	2	4	1
1575	0	2	0	1	3	0	2	2	1	0	2	2	2	1	0	0	0	20	0	0	0	2	2	2	2	4	0
1576	0	5	0	1	3	1	2	1	0	1	1	2	2	1	0	0	1	20	0	0	1	2	1	2	2	4	1
1577	0	2	0	3	3	1	2	2	1	1	2	3	3	1	1	0	0	20	0	0	1	2	2	3	3	6	1
1578	0	5	0	4	1	0	3	3	1	1	2	3	3	1	0	0	0	20	0	0	0	3	3	3	3	6	0
1579	0	2	0	1	3	0	1	2	1	1	1	2	2	1	1	0	0	20	0	0	1	1	2	2	2	4	1
1580	0	4	0	1	0	1	3	1	1	1	1	3	3	1	0	0	0	20	1	0	0	3	1	3	3	6	1
1581	0	1	0	3	1	1	3	2	1	1	1	3	3	1	0	0	1	20	0	0	1	3	2	3	3	6	1
1582	1	5	0	2	3	0	2	1	0	0	2	2	2	1	0	0	0	20	0	0	0	2	1	2	2	4	0
1583	0	5	0	2	3	0	2	1	0	0	2	2	2	1	0	0	0	20	0	0	0	2	1	2	2	4	0
1584	1	1	0	4	2	0	3	2	1	0	2	2	2	1	0	0	0	20	0	0	0	3	2	2	2	4	0
1585	0	1	0	3	2	0	3	2	0	0	2	3	3	1	0	0	0	20	0	0	0	3	2	3	3	6	0
1586	0	2	0	4	0	0	3	3	0	0	2	3	3	1	0	0	0	20	0	0	0	3	3	3	3	6	0
1587	1	5	0	2	1	0	2	1	1	0	2	2	2	1	0	0	0	20	0	0	0	2	1	2	2	4	0
1588	0	2	0	2	1	1	3	2	0	1	1	3	2	1	0	0	1	20	0	0	1	3	2	3	2	5	1
1589	1	5	0	2	3	0	2	1	0	0	2	2	2	1	0	0	0	20	0	0	0	2	1	2	2	4	0
1590	0	1	0	4	1	0	3	3	0	0	2	3	3	1	0	0	0	20	0	0	0	3	3	3	3	6	0
1591	0	4	0	1	3	0		1	1	0	1	3	3	1	1	0	0	20	0	0	1		1	3	3	6	1
1592	0	2	0	1	0	0	1	2	0	1	2	2	2	1	1	0	0	20	0	0	1	1	2	2	2	4	1
1593	1	5	0	2	1	0	3	2	1	0	2	2	2	1	0	0	0	20	0	0	0	3	2	2	2	4	0
1594	1	3	0	3	1	0	3	3	0	0	2	3	2	1	0	0	0	20	0	0	0	3	3	3	2	5	0
1595	1	2	0	3	0	0	3	2	0	0	2	2	2	1	0	0	0	20	0	0	0	3	2	2	2	4	0
1596	1	5	0	3	1	0	3	3	1	1	2	3	2	1	0	0	0	20	0	0	0	3	3	3	2	5	0
1597	1	4	0	2	2	0	1	2	0	0	2	2	2	1	0	0	0	20	0	0	0	1	2	2	2	4	0
1598	0	4	0	3	4	0	2	1	1	0	1	2	1	1	0	1	0	20	0	0	1	2	1	2	1	3	1
1599	0	4	0	4	0	0	2	1	1	1	1	2	2	1	0	0	1	20	0	0	1	2	1	2	2	4	1
1600	0	4	0	3	2	0	3	2	0	0	2	3	2	1	0	0	0	20	0	0	0	3	2	3	2	5	0
1601	1	1	0	4	2	0	3	2	0	0	2	3	2	1	0	0	0	20	0	0	0	3	2	3	2	5	0
1602	1	3	0	2	0	0	2	1	0	0	2	2	2	1	0	0	0	20	0	0	0	2	1	2	2	4	0
1603	0	1	0	3	3	0	3	3	1	0	2	3	3	1	1	0	0	20	0	0	1	3	3	3	3	6	1
1604	0	5	0	2	0	1	3	2	1	1	1	3	2	1	1	0	0	20	0	0	1	3	2	3	2	5	1
1605	1	3	0	2	2	0	2	1	1	0	2	2	1	1	1	0	0	20	0	0	1	2	1	2	1	3	1
1606	0	5	0	2	0	1	3	2	1	1	1	2	2	1	1	0	0	20	0	0	1	3	2	2	2	4	1
1607	1	1	0	3	0	0	3	3	0	1	2	3	3	1	0	0	0	20	0	0	0	3	3	3	3	6	0
1608	0	4	0	1	0	0	2	1	0	0	2	2	1	1	0	0	0	20	0	0	0	2	1	2	1	3	0
1609	1	4	0	2	0	0	2	1	0	1	2	2	1	1	0	0	0	20	0	0	0	2	1	2	1	3	0
1610	1	3	0	3	2	0	3	3	1	0	2	3	3	1	0	0	0	20	0	0	0	3	3	3	3	6	0
1611	0	2	0	2	0	1	3	2	0	0	2	2	2	1	1	0	0	20	0	0	1	3	2	2	2	4	1
1612	0	1	0	1	3	0	3	1	1	1	2	3	3	1	1	0	0	20	0	0	1	3	1	3	3	6	1
1613	0	5	0	3	1	0	3	2	1	1	2	3	3	1	0	0	0	20	0	0	0	3	2	3	3	6	0
1614	1	3	0	2	2	0		2	1	1	2	3	3	1	0	0	1	20	0	0	1		2	3	3	6	1
1615	1	5	0	3	1	0	3	2	1	1	2	3	3	1	0	0	0	20	0	0	0	3	2	3	3	6	0
1616	0	3	0	3	0	1	3	3	1	0	2	3	3	1	0	0	0	20	0	0	0	3	3	3	3	6	0
1617	0	1	0	3	2	0	3	2	0	0	2	3	3	1	0	0	0	20	0	0	0	3	2	3	3	6	0
1618	0	2	0	1	3	1	3	2	0	1	1	3	2	1	0	0	1	20	0	0	1	3	2	3	2	5	1
1619	0	1	0	1	0	0	3	2	1	1	2	3	3	1	0	0	1	20	0	0	1	3	2	3	3	6	1
1620	0	5	0	3	0	1	2	1	0	1	2	1	2	1	0	0	0	20	1	0	0	2	1	1	2	3	1
1621	0	4	0	3	2	0	3	2	0	0	2	3	2	1	0	0	0	20	0	0	0	3	2	3	2	5	0
1622	0	4	0	2	0	1		1	1	1	1	3	3	1	0	0	1	20	0	0	1		1	3	3	6	1
1623	0	4	0	1	3	0		2	0	1	2	3	3	1	0	0	1	20	0	0	1		2	3	3	6	1
1624	0	1	0	2	4	0	2	2	0	0	2	2	2	1	0	0	1	20	0	0	1	2	2	2	2	4	1
1625	0	2	0	2	0	1	4	2	1	1	1	3	2	1	0	0	1	20	0	0	1	3	2	3	2	5	1
1626	0	1	0	4	0	0	3	2	0	0	2	2	2	1	0	0	0	20	0	0	0	3	2	2	2	4	0
1627	1	2	0	1	4	0	2	2	1	1	1	2	1	1	0	1	0	20	0	0	1	2	2	2	1	3	1
1628	1	4	0	1	1	0	2	1	0	1	2	2	2	1	0	0	0	20	0	0	0	2	1	2	2	4	0
1629	1	1	0	3	1	0	3	3	0	1	2	3	3	1	0	0	0	20	0	0	0	3	3	3	3	6	0
1630	0	1	0	4	0	0	3	2	0	0	2	2	2	1	0	0	0	20	0	0	0	3	2	2	2	4	0
1631	0	1	0	3	3	0	3	2	1	0	2	3	3	1	0	0	0	20	0	0	0	3	2	3	3	6	0
1632	1	1	0	1	1	1	2	2	0	1	1	2	2	1	0	0	1	20	0	0	1	2	2	2	2	4	1
1633	1	2	0	3	0	0	3	2	0	0	2	2	2	1	0	0	0	20	0	0	0	3	2	2	2	4	0
1634	1	1	0	3	0	0	3	1	0	0	2	3	3	1	0	0	0	20	0	0	0	3	1	3	3	6	0
1635	1	3	0	3	0	0	3	3	0	0	2	3	3	1	0	0	0	20	0	0	0	3	3	3	3	6	0
1636	0	3	0	2	0	0	3	1	1	0	1	3	2	1	0	0	1	20	0	0	1	3	1	3	2	5	1
1637	1	1	0	3	0	0	3	2	0	0	2	2	2	1	0	0	0	20	0	0	0	3	2	2	2	4	0
1638	1	3	0	3	2	0	3	3	0	0	2	3	2	1	0	0	0	20	0	0	0	3	3	3	2	5	0
1639	1	3	0	1	2	1	1	2	1	1	1	1	2	1	0	0	1	20	0	0	1	1	2	1	2	3	1
1640	1	4	0	1	0	1	2	1	0	0	2	3	2	1	0	0	0	20	0	0	0	2	1	3	2	5	0
1641	1	5	0	2	4	0	3	3	0	0	2	3	2	1	0	0	0	20	0	0	0	3	3	3	2	5	0
1642	0	4	0	2	3	1		1	1	1	1	3	3	1	0	0	1	20	0	0	1		1	3	3	6	1
1643	0	3	0	3	0	1	3	3	0	0	2	3	3	1	1	0	0	20	0	0	1	3	3	3	3	6	1
1644	1	4	0	1	1	1		2	1	1	1	3	3	1	0	0	1	20	0	0	1		2	3	3	6	1
1645	1	2	0	3	2	1	3	3	0	1	2	2	2	1	0	0	0	20	0	0	0	3	3	2	2	4	0
1646	1	5	0	2	4	0	3	2	0	0	2	2	2	1	0	0	0	20	0	0	0	3	2	2	2	4	0
1647	0	4	0	1	0	0	3	2	0	0	2	2	1	1	0	0	0	20	0	0	0	3	2	2	1	3	0
1648	1	2	0	3	1	1	3	2	0	1	2	2	2	1	0	0	0	20	0	0	0	3	2	2	2	4	0
1649	1	1	0	3	0	0	3	2	1	0	2	3	3	1	0	0	0	20	0	0	0	3	2	3	3	6	0
1650	1	5	0	2	4	0	3	2	0	0	2	2	2	1	0	0	0	20	0	0	0	3	2	2	2	4	0
1651	1	1	0	4	1	0	3	2	0	0	2	2	2	1	0	0	0	20	0	0	0	3	2	2	2	4	0
1652	0	4	0	1	0	0		2	0	1	2	3	3	1	0	0	1	20	0	0	1		2	3	3	6	1
1653	1	4	0	2	2	0		1	0	1	2	3	3	1	0	0	1	20	0	0	1		1	3	3	6	1
1654	0	3	0	2	0	0	3	1	1	0	1	3	2	1	0	0	1	20	0	0	1	3	1	3	2	5	1
1655	0	4	0	2	0	1		1	1	1	1	3	3	1	0	0	1	20	0	0	1		1	3	3	6	1
1656	0	4	0	2	0	1		1	1	1	1	3	3	1	0	0	1	20	0	0	1		1	3	3	6	1
1657	0	4	0	3	0	1	2	1	0	1	2	2	2	1	0	0	0	20	1	0	0	2	1	2	2	4	1
1658	0	1	0	3	0	0	3	1	0	1	2	3	3	1	0	0	0	20	0	0	0	3	1	3	3	6	0
1659	0	5	0	1	3	1	2	1	0	1	1	2	2	1	0	0	1	20	0	0	1	2	1	2	2	4	1
1660	1	1	0	2	2	0	2	2	0	0	2	2	2	1	0	0	0	20	0	0	0	2	2	2	2	4	0
1661	0	3	0	2	1	1	2	1	0	1	1	2	1	1	0	0	1	20	0	0	1	2	1	2	1	3	1
1662	0	1	0	2	4	0	2	2	0	0	2	2	2	1	0	0	1	20	0	0	1	2	2	2	2	4	1
1663	0	5	0	1	3	1	2	1	0	1	1	2	2	1	0	0	1	20	0	0	1	2	1	2	2	4	1
1664	1	1	0	2	2	0	2	2	0	0	2	2	2	1	0	0	0	20	0	0	0	2	2	2	2	4	0
1665	0	4	0	1	0	0	2	1	0	0	2	2	1	1	0	0	0	20	0	0	0	2	1	2	1	3	0
1666	1	4	0	2	0	0	2	1	0	1	2	2	1	1	0	0	0	20	0	0	0	2	1	2	1	3	0
1667	1	1	0	4	2	0	3	2	0	0	2	3	2	1	0	0	0	20	0	0	0	3	2	3	2	5	0
1668	0	2	0	3	3	0	3	3	1	1	1	3	3	1	1	0	0	20	0	0	1	3	3	3	3	6	1
1669	0	1	0	1	3	0	2	2	1	0	1	2	2	1	1	0	0	20	0	0	1	2	2	2	2	4	1
1670	1	3	0	1	3	0	1	2	0	1	2	2	2	1	0	0	1	20	3	0	1	1	2	2	2	4	4
1671	0	5	0	2	0	1	3	2	1	1	1	2	2	1	0	0	0	20	0	0	0	3	2	2	2	4	0
1672	1	1	0	3	0	0	3	2	0	0	2	2	2	1	0	0	0	20	0	0	0	3	2	2	2	4	0
1673	0	5	0	1	3	1	2	1	0	1	1	2	2	1	0	0	1	20	0	0	1	2	1	2	2	4	1
1674	1	2	0	4	2	0	3	3	0	0	2	3	3	1	0	0	0	20	0	0	0	3	3	3	3	6	0
1675	0	3	0	2	3	1	3	2	1	1	1	3	3	1	0	0	1	20	0	0	1	3	2	3	3	6	1
1676	1	2	0	3	0	0	3	3	0	0	2	3	3	1	0	0	0	20	0	0	0	3	3	3	3	6	0
1677	1	2	0	4	0	0	3	3	0	0	2	3	3	1	0	0	0	20	0	0	0	3	3	3	3	6	0
1678	0	3	0	2	0	1	3	3	1	1	2	3	3	1	1	0	0	20	0	0	1	3	3	3	3	6	1
1679	1	3	0	2	0	0	1	2	0	0	2	1	2	1	0	0	0	20	0	0	0	1	2	1	2	3	0
1680	1	3	0	3	2	0	3	3	0	0	2	3	3	1	0	0	0	20	0	0	0	3	3	3	3	6	0
1681	1	2	0	2	1	1	1	2	1	1	1	2	2	1	0	0	1	20	0	0	1	1	2	2	2	4	1
1682	1	3	0	2	0	0	1	2	0	0	2	1	2	1	0	0	0	20	0	0	0	1	2	1	2	3	0
1683	1	5	0	2	4	0	3	2	0	0	2	2	2	1	0	0	0	20	0	0	0	3	2	2	2	4	0
1684	0	1	0	3	0	0	3	3	0	0	2	3	3	1	1	0	0	20	0	0	1	3	3	3	3	6	1
1685	1	3	0	3	2	0	3	3	0	0	2	3	2	1	0	0	0	20	0	0	0	3	3	3	2	5	0
1686	1	2	0	3	0	0	3	2	0	0	2	2	2	1	0	0	0	20	0	0	0	3	2	2	2	4	0
1687	0	5	0	2	1	0	3	2	1	0	2	3	3	1	0	0	0	20	0	0	0	3	2	3	3	6	0
1688	0	2	0	3	4	0	2	2	0	0	2	2	2	1	0	0	1	20	0	0	1	2	2	2	2	4	1
1689	0	2	0	3	3	1	2	2	1	1	2	3	3	1	1	0	0	20	0	0	1	2	2	3	3	6	1
1690	0	5	0	1	3	1	2	1	0	1	1	2	2	1	0	0	1	20	0	0	1	2	1	2	2	4	1
1691	0	4	0	2	3	1	2	1	1	1	1	2	2	1	0	1	0	20	0	0	1	2	1	2	2	4	1
1692	0	2	0	2	1	1	3	2	0	1	1	3	2	1	0	0	1	20	0	0	1	3	2	3	2	5	1
1693	1	2	0	3	2	0	3	2	0	1	2	2	2	1	0	0	0	20	0	0	0	3	2	2	2	4	0
1694	1	1	0	4	0	0	3	4	0	0	2	3	3	1	0	0	0	20	0	0	0	3	3	3	3	6	0
1695	0	5	0	1	0	1	2	1	0	0	2	2	2	1	0	0	0	20	0	0	0	2	1	2	2	4	0
1696	0	5	0	3	3	0	1	1	1	0	1	1	2	1	1	0	0	20	0	0	1	1	1	1	2	3	1
1697	1	4	0	1	2	1		2	1	1	1	3	3	1	0	0	1	20	0	0	1		2	3	3	6	1
1698	0	4	0	3	3	0		1	0	1	2	3	3	1	0	0	0	20	0	0	0		1	3	3	6	0
1699	1	4	0	2	1	0	2	1	0	0	2	2	1	1	0	0	0	20	0	0	0	2	1	2	1	3	0
1700	1	3	0	2	3	0	2	1	0	1	2	2	2	1	0	0	0	20	0	0	0	2	1	2	2	4	0
1701	0	4	0	3	1	0	3	2	0	0	2	3	2	1	0	0	0	20	0	0	0	3	2	3	2	5	0
1702	0	5	0	2	0	1	2	1	0	0	1	1	2	1	0	0	0	20	0	0	0	2	1	1	2	3	0
1703	0	2	0	3	3	0	2	1	0	1	2	2	2	1	0	0	1	20	0	0	1	2	1	2	2	4	1
1704	0	5	0	3	1	0	3	2	1	1	2	3	3	1	0	0	0	20	0	0	0	3	2	3	3	6	0
1705	0	1	0	2	1	0	2	2	0	0	2	2	2	1	0	0	0	20	0	0	0	2	2	2	2	4	0
1706	0	2	0	2	0	1	3	2	0	0	2	2	2	1	1	0	0	20	0	0	1	3	2	2	2	4	1
1707	0	5	0	2	0	1	3	2	0	1	1	2	2	1	0	0	0	20	0	0	0	3	2	2	2	4	0
1708	1	1	0	4	2	0	3	2	1	0	2	2	2	1	0	0	0	20	0	0	0	3	2	2	2	4	0
1709	0	1	0	3	0	0	3	3	0	1	2	3	3	1	0	0	0	20	0	0	0	3	3	3	3	6	0
1710	1	2	0	3	0	0	3	2	0	0	2	2	2	1	0	0	0	20	0	0	0	3	2	2	2	4	0
1711	1	5	0	2	3	0	3	2	0	0	2	2	2	1	0	0	0	20	0	0	0	3	2	2	2	4	0
1712	1	3	0	2	2	0		2	0	0	2	3	3	1	0	0	0	20	0	0	0		2	3	3	6	0
1713	0	1	0	3	0	0	3	1	0	1	2	3	3	1	0	0	0	20	0	0	0	3	1	3	3	6	0
1714	1	3	0	1	4	0	1	2	1	1	1	1	2	1	0	1	0	20	0	0	1	1	2	1	2	3	1
1715	0	1	0	3	0	0	3	3	0	0	2	3	3	1	1	0	0	20	0	0	1	3	3	3	3	6	1
1716	1	1	0	2	2	0	2	2	0	0	2	2	2	1	0	0	0	20	0	0	0	2	2	2	2	4	0
1717	0	5	0	1	3	1	2	1	0	1	1	2	2	1	0	0	1	20	0	0	1	2	1	2	2	4	1
1718	1	3	0	2	2	0	3	3	1	0	2	3	4	1	1	0	0	20	0	0	1	3	3	3	3	6	1
1719	0	5	0	3	3	0	3	2	1	0	1	3	2	1	1	0	0	20	0	0	1	3	2	3	2	5	1
1720	1	1	0	3	1	0	3	2	0	1	2	3	3	1	0	0	0	20	0	0	0	3	2	3	3	6	0
1721	0	1	0	1	0	0	2	2	0	1	2	2	2	1	0	0	0	20	0	0	0	2	2	2	2	4	0
1722	0	3	0	2	0	1		2	0	1	2	3	3	1	1	0	0	20	0	0	1		2	3	3	6	1
1723	1	2	0	4	0	0	3	3	0	0	2	3	3	1	0	0	0	20	0	0	0	3	3	3	3	6	0
1724	0	2	0	3	1	1	3	3	1	1	2	2	2	1	0	0	0	20	0	0	0	3	3	2	2	4	0
1725	0	1	0	3	0	1	3	1	0	1	2	3	3	1	0	0	0	20	0	0	0	3	1	3	3	6	0
1726	0	1	0	2	1	1	2	2	0	1	0	2	2	1	1	0	0	20	0	0	1	2	2	2	2	4	1
1727	0	1	0	2	3	0	2	2	0	0	2	3	3	1	1	0	0	20	0	0	1	2	2	3	3	6	1
1728	0	2	0	1	3	0	1	2	1	1	1	2	2	1	1	0	0	20	0	0	1	1	2	2	2	4	1
1729	0	1	0	3	4	0	2	1	1	1	2	3	2	1	1	0	0	20	0	0	1	2	1	3	2	5	1
1730	0	5	0	3	0	1	3	2	0	1	1	3	2	1	0	0	0	20	0	0	0	3	2	3	2	5	0
1731	0	2	0	1	3	0	1	2	1	0	1	2	2	1	0	1	0	20	0	0	1	1	2	2	2	4	1
1732	0	5	0	4	1	0	3	3	1	1	2	3	3	1	0	0	0	20	0	0	0	3	3	3	3	6	0
1733	0	4	0	3	1	0	3	1	0	0	2	3	3	1	1	0	0	20	0	0	1	3	1	3	3	6	1
1734	0	5	0	1	3	1	2	1	0	1	1	2	2	1	0	0	1	20	0	0	1	2	1	2	2	4	1
1735	0	5	0	2	0	1	3	2	0	1	1	2	2	1	0	0	0	20	0	0	0	3	2	2	2	4	0
1736	1	3	0	3	2	0	4	3	0	0	2	3	3	1	0	0	0	20	0	0	0	3	3	3	3	6	0
1737	0	5	0	2	0	1	3	2	1	1	1	2	2	1	1	0	0	20	0	0	1	3	2	2	2	4	1
1738	0	5	0	2	0	1	3	2	1	1	1	2	2	1	1	0	0	20	0	0	1	3	2	2	2	4	1
1739	0	2	0	3	1	1	3	3	0	1	2	2	2	1	0	0	0	20	0	0	0	3	3	2	2	4	0
1740	0	4	0	1	3	0		1	1	1	2	3	3	1	0	0	0	20	0	0	0		1	3	3	6	0
1741	0	5	0	2	0	1	2	1	1	0	1	1	2	1	0	0	0	20	0	0	0	2	1	1	2	3	0
1742	0	5	0	1	0	1	2	1	0	1	2	2	2	1	0	0	0	20	0	0	0	2	1	2	2	4	0
1743	0	5	0	1	1	0	3	3	1	0	2	3	3	1	0	0	0	20	0	0	0	3	3	3	3	6	0
1744	1	3	0	3	1	0	4	1	0	0	2	4	3	1	0	0	0	20	0	0	0	3	1	3	3	6	0
1745	0	5	0	1	4	0	3	3	0	0	2	3	3	1	0	0	0	20	0	0	0	3	3	3	3	6	0
[truncated: 5,080 more rows]

## Sheet: Foglio3 (2)
Households	European	St Dev European	Immigrant	Dev st Immigrant
[truncated: 27 more rows]
